# Supplementary material for: HNRNPM controls circRNA biogenesis and splicing fidelity to sustain cancer cell fitness
Source: eLife. 2021 Jun 2;10:e59654. doi: 10.7554/eLife.59654 (PMC8346284; doi:10.7554/eLife.59654)
Supplement: Figure 1—source data 1. [file elife-59654-fig1-data1.xlsx]

## Sheet: Source Data 1
Source Data 1: Rotational Gene Set Analysis (ROAST) results: Tumor verus Input (P1)
	NGenes	Direction	P-value	FDR
HNRNPL, LOC644390	4	Down	0.001	0.01275
CLK1	7	Down	0.001	0.01275
SYNCRIP	5	Up	0.002	0.02125
HNRNPU	5	Down	0.003	0.02125
HNRNPM	4	Down	0.003	0.02125
HNRNPF	5	Down	0.003	0.02125
SF3A1	3	Down	0.009	0.0541875
SF3B1	5	Down	0.009	0.0541875
PCBP1	4	Down	0.013	0.0708333
SFRS2	22	Down	0.015	0.07395
SFRS1	5	Down	0.017	0.0765
U2AF2	4	Down	0.022	0.091375
SON	4	Down	0.034	0.125679
PHF5A	5	Down	0.035	0.125679
ZRSR2	4	Down	0.04	0.1343
FBXO10, SHB, TOMM5	3	Down	0.047	0.148219
SFRS11	5	Down	0.073	0.2175
HNRNPD	5	Up	0.092	0.253658
SF1	4	Down	0.095	0.253658
HNRPLL	5	Down	0.106	0.269025
SFRS3	5	Down	0.135	0.304937
HNRNPUL1	3	Down	0.138	0.304937
ARL6IP4	8	Down	0.14	0.304937
SFRS4	5	Down	0.144	0.304937
PRPF8	3	Down	0.183	0.3723
LUC7L2	4	Down	0.201	0.393288
HNRNPR	5	Down	0.209	0.393833
RBM35B	5	Down	0.23	0.418018
ESRP1	3	Down	0.293	0.51085
SFRS7	5	Down	0.301	0.51085
CLK3	5	Up	0.317	0.520694
SFRS9	4	Down	0.33	0.525141
LOC644422, SFRS6	3	Down	0.41	0.632864
HNRPDL	5	Down	0.444	0.66525
HNRNPH1	3	Down	0.574	0.793115
CLK4	7	Down	0.58	0.793115
RSRC1	6	Down	0.587	0.793115
SFRS12	5	Up	0.595	0.793115
PRPF40B	4	Up	0.607	0.793115
NSUN5, NSUN5B, NSUN5C	4	Down	0.686	0.874012
CLK2	4	Down	0.716	0.890012
RBMY1A1, RBMY1B, RBMY1D, RBMY1E, RBMY1F, RBMY1J	14	Down	0.76	0.92225
SRPK2	5	Down	0.835	0.9755
CLK2, CLK2P	4	Up	0.901	0.9755
HNRNPH2	5	Down	0.908	0.9755
SFRS5	5	Up	0.936	0.9755
SRPK1	4	Up	0.949	0.9755
RBM9	4	Down	0.949	0.9755
PTBP1	3	Down	0.956	0.9755
HNRNPAB	5	Up	0.975	0.9755
FUS	10	Down	0.976	0.976
