# Supplementary material for: HNRNPM controls circRNA biogenesis and splicing fidelity to sustain cancer cell fitness
Source: eLife. 2021 Jun 2;10:e59654. doi: 10.7554/eLife.59654 (PMC8346284; doi:10.7554/eLife.59654)
Supplement: Figure 1—source data 2. [file elife-59654-fig1-data2.xlsx]

## Sheet: Source Data 2
Source Data 2: Rotational Gene Set Analysis (ROAST) results: In vitro
	NGenes	Direction	P-value	FDR
SYNCRIP	5	Up	0.001	0.002125
HNRPDL	5	Up	0.001	0.002125
LUC7L2	4	Down	0.001	0.002125
RBM9	4	Up	0.001	0.002125
ZRSR2	4	Up	0.001	0.002125
SFRS2	22	Down	0.001	0.002125
CLK3	5	Down	0.001	0.002125
HNRNPAB	5	Up	0.001	0.002125
SFRS11	5	Up	0.001	0.002125
SFRS12	5	Up	0.001	0.002125
PHF5A	5	Down	0.001	0.002125
CLK2	4	Up	0.001	0.002125
FUS	10	Up	0.002	0.0051
CLK2, CLK2P	4	Down	0.002	0.0051
HNRNPUL1	3	Up	0.002	0.0051
NSUN5, NSUN5B, NSUN5C	4	Up	0.003	0.00708333
RBMY1A1, RBMY1B, RBMY1D, RBMY1E, RBMY1F, RBMY1J	14	Up	0.003	0.00708333
SF3A1	3	Down	0.003	0.00708333
LOC644422, SFRS6	3	Down	0.004	0.00939474
ARL6IP4	8	Up	0.005	0.0109286
HNRPLL	5	Up	0.005	0.0109286
HNRNPF	5	Down	0.006	0.0121957
RSRC1	6	Up	0.006	0.0121957
SFRS4	5	Down	0.007	0.0138125
SF1	4	Up	0.01	0.01938
HNRNPM	4	Down	0.011	0.0205962
SFRS3	5	Up	0.013	0.0236111
SRPK1	4	Up	0.017	0.0300536
PTBP1	3	Up	0.023	0.039569
SRPK2	5	Up	0.033	0.05525
HNRNPL, LOC644390	4	Down	0.035	0.0567581
CLK4	7	Up	0.039	0.0610455
HNRNPH2	5	Up	0.04	0.0610455
SFRS1	5	Down	0.049	0.07275
HNRNPD	5	Up	0.053	0.074375
SFRS7	5	Down	0.053	0.074375
CLK1	7	Down	0.06	0.0820135
PRPF40B	4	Up	0.073	0.0973026
SF3B1	5	Down	0.089	0.112837
HNRNPH1	3	Up	0.089	0.112837
FBXO10, SHB, TOMM5	3	Down	0.097	0.120037
HNRNPR	5	Up	0.164	0.198536
HNRNPU	5	Up	0.207	0.244919
PCBP1	4	Down	0.24	0.2771
SFRS5	5	Up	0.245	0.2771
U2AF2	4	Down	0.271	0.299902
PRPF8	3	Up	0.33	0.357543
ESRP1	3	Up	0.358	0.379844
SON	4	Down	0.583	0.606276
SFRS9	4	Up	0.761	0.77571
RBM35B	5	Up	0.824	0.824
