# Supplementary material for: HNRNPM controls circRNA biogenesis and splicing fidelity to sustain cancer cell fitness
Source: eLife. 2021 Jun 2;10:e59654. doi: 10.7554/eLife.59654 (PMC8346284; doi:10.7554/eLife.59654)
Supplement: Figure 4—source data 1. [file elife-59654-fig4-data1.xlsx]

## Sheet: Source Data 3
Source Data 3: Gene Expression Changes in all HNRNPM bound genes (Figure 4A)
Ensembl_gene_id	B7/SCR Log2(fold_change)	B7/SCR Test_Stat	B7/SCR p_value	B7/SCR q_value	B7/SCR significant	B9/SCR Log2(fold_change)	B9/SCR Test_Stat	B9/SCR p_value	B9/SCR q_value	B9/SCR significant
ENSG00000000457	0.441931	1.77161	0.00265	0.0129582	yes	0.190537	0.747563	0.19095	0.385724	no
ENSG00000001629	-0.077165	-0.311161	0.5863	0.791938	no	0.188958	0.784379	0.1701	0.356708	no
ENSG00000001630	0.233317	1.81751	0.00135	0.00733226	yes	0.366083	2.82151	5e-05	0.000394466	yes
ENSG00000001631	-0.185191	-0.968823	0.0911	0.225714	no	0.0499853	0.263017	0.64455	0.833538	no
ENSG00000002016	-0.300525	-0.610733	0.26885	0.486735	no	-0.454429	-0.890328	0.1222	0.280938	no
ENSG00000002549	-0.0139245	-0.107914	0.8503	0.940319	no	-0.0137068	-0.10414	0.86095	0.944422	no
ENSG00000002822	-0.1593	-0.808809	0.14975	0.326122	no	0.0876769	0.310146	0.56665	0.777648	no
ENSG00000003056	-0.181958	-0.963153	0.08955	0.222891	no	0.126437	0.677613	0.2331	0.442313	no
ENSG00000003096	-0.0108702	-0.0771749	0.88555	0.953596	no	0.141527	1.1303	0.04305	0.126626	no
ENSG00000003137	0.820126	1.12616	0.02935	0.0935319	no	0.795559	1.06239	0.04195	0.124016	no
ENSG00000003147	0.00517395	0.0306515	0.95515	0.97983	no	-0.344763	-2.30537	0.0001	0.000748217	yes
ENSG00000003436	0.344237	2.14522	0.00025	0.00169574	yes	0.778459	4.88572	5e-05	0.000394466	yes
ENSG00000003756	0.181229	0.694006	0.22675	0.434281	no	0.224931	0.856907	0.14135	0.312498	no
ENSG00000003987	3.05926	0	1	1	no	1.67932	0	1	1	no
ENSG00000004534	-0.287433	-1.0267	0.0462	0.133781	no	-0.116066	-0.436664	0.40755	0.640503	no
ENSG00000004660	0.261441	2.28429	5e-05	0.000394466	yes	0.646107	5.67657	5e-05	0.000394466	yes
ENSG00000004766	0.0520245	0.272924	0.63	0.823918	no	-0.0611302	-0.341327	0.53345	0.752178	no
ENSG00000004779	0.0609382	0.513432	0.36875	0.600944	no	0.281891	2.37821	5e-05	0.000394466	yes
ENSG00000004864	-0.129344	-0.613666	0.18405	0.376315	no	0.147392	0.677936	0.1594	0.34097	no
ENSG00000004866	-0.304851	-1.98682	0.0003	0.00199267	yes	-0.458787	-2.96935	5e-05	0.000394466	yes
ENSG00000004897	0.240552	1.22152	0.02975	0.0945889	no	0.398149	2.0443	0.0006	0.00365163	yes
ENSG00000004961	-0.531507	-1.51593	0.0091	0.0362684	yes	0.4349	1.45735	0.01365	0.0504355	no
ENSG00000004975	0.0773782	0.443519	0.4409	0.673517	no	0.193158	1.08183	0.0598	0.163478	no
ENSG00000005007	0.093058	0.496063	0.37665	0.609336	no	0.345827	1.80739	0.0019	0.00979865	yes
ENSG00000005020	0.111493	0.518914	0.3653	0.597625	no	-0.278614	-1.27673	0.02395	0.0794408	no
ENSG00000005175	0.163044	0.921929	0.10795	0.256262	no	0.215512	1.21229	0.03555	0.109006	no
ENSG00000005206	-0.172791	-0.702315	0.21765	0.422196	no	-0.312512	-1.13319	0.05055	0.143401	no
ENSG00000005339	0.226777	0.747989	0.1832	0.375325	no	0.186805	0.567569	0.31425	0.541358	no
ENSG00000005436	-0.551007	-2.10165	0.0003	0.00199267	yes	-0.480095	-1.80302	0.0019	0.00979865	yes
ENSG00000005469	-0.522366	-2.95157	5e-05	0.000394466	yes	-0.186929	-1.02486	0.07405	0.192703	no
ENSG00000005483	0.0733157	0.227531	0.6785	0.854614	no	0.225608	0.687978	0.21375	0.41707	no
ENSG00000005700	-0.0226927	-0.183161	0.7431	0.891753	no	-0.0309909	-0.252046	0.6596	0.842749	no
ENSG00000005801	-0.0369333	-0.228496	0.69215	0.863558	no	0.0931995	0.59383	0.3044	0.529828	no
ENSG00000005810	-0.0757363	-0.266793	0.5172	0.739851	no	0.29311	1.00447	0.0197	0.067906	no
ENSG00000005889	0.032345	0.154899	0.78005	0.909678	no	0.334495	1.58807	0.0046	0.0205619	yes
ENSG00000006062	0.419499	1.55303	0.0085	0.0343066	yes	0.756708	2.65197	5e-05	0.000394466	yes
ENSG00000006125	0.0461923	0.295914	0.5831	0.789793	no	-0.0750468	-0.495375	0.3657	0.597997	no
ENSG00000006194	-0.286627	-1.27208	0.02705	0.0876857	no	-0.459831	-2.01624	0.0003	0.00199267	yes
ENSG00000006282	0.248182	1.72413	0.00175	0.0091262	yes	-0.131337	-0.875992	0.1086	0.257397	no
ENSG00000006432	-0.114141	-0.605486	0.28555	0.507611	no	0.714534	3.72002	5e-05	0.000394466	yes
ENSG00000006451	0.175759	1.01879	0.0681	0.180718	no	0.134481	0.79593	0.16215	0.34504	no
ENSG00000006453	0.254119	1.311	0.0219	0.0739656	no	0.263407	1.35062	0.01655	0.0589143	no
ENSG00000006459	0.569422	2.28613	5e-05	0.000394466	yes	0.42879	1.82403	0.00115	0.00640105	yes
ENSG00000006468	0.296734	1.67204	0.00305	0.0145908	yes	0.205847	1.16446	0.0397	0.11901	no
ENSG00000006530	-0.0621043	-0.267854	0.63355	0.826278	no	-0.110698	-0.464321	0.40885	0.641945	no
ENSG00000006576	-0.420601	-2.55684	5e-05	0.000394466	yes	-0.117415	-0.668606	0.2346	0.444204	no
ENSG00000006607	0.282706	0.80617	0.15025	0.326877	no	0.359988	0.982719	0.077	0.198441	no
ENSG00000006634	-0.355881	-1.56255	0.00685	0.028723	yes	0.22025	1.09877	0.05475	0.152595	no
ENSG00000006652	-0.314661	-2.20369	5e-05	0.000394466	yes	-0.384339	-2.61045	5e-05	0.000394466	yes
ENSG00000006704	-0.247995	-1.57818	0.00825	0.0334634	yes	-0.17885	-1.1141	0.05265	0.148091	no
ENSG00000006715	-0.126379	-0.592971	0.29725	0.521348	no	-0.399499	-1.89356	0.0005	0.00312122	yes
ENSG00000006740	-0.148368	-0.742243	0.1912	0.386074	no	-0.287835	-1.41164	0.0143	0.0523656	no
ENSG00000006744	0.182592	0.906945	0.11435	0.267488	no	0.306433	1.61531	0.00665	0.0280372	yes
ENSG00000006831	0.199565	1.41856	0.00915	0.0364309	yes	0.0977748	0.680763	0.20595	0.406694	no
ENSG00000007168	0.32759	1.54357	0.00695	0.0290653	yes	0.280938	1.28978	0.0255	0.083492	no
ENSG00000007202	0.0851585	0.333883	0.4092	0.642113	no	0.288793	1.18533	0.0047	0.0209396	yes
ENSG00000007255	-0.12389	-0.428146	0.44955	0.681636	no	-0.951015	-2.68989	5e-05	0.000394466	yes
ENSG00000007341	0.143891	0.27101	0.6572	0.841104	no	-0.0424126	-0.077354	0.8972	0.958057	no
ENSG00000007372	0.971974	0	1	1	no	#NAME?	0	1	1	no
ENSG00000007392	-0.127955	-0.829062	0.14565	0.319391	no	-0.12023	-0.77622	0.1756	0.364747	no
ENSG00000007541	0.0754633	0.350417	0.4617	0.692738	no	-0.241904	-1.46766	0.00895	0.0357555	yes
ENSG00000007545	0.463637	0.471755	0.1644	0.348515	no	0.775901	0.792479	0.02295	0.0767629	no
ENSG00000007923	-0.00179785	-0.00982898	0.9853	0.991512	no	0.200257	1.0742	0.0594	0.16265	no
ENSG00000008018	0.247093	2.08221	0.0003	0.00199267	yes	0.126764	1.06634	0.0632	0.170567	no
ENSG00000008083	0.127864	0.964104	0.07965	0.203575	no	0.177525	1.38508	0.013	0.0485063	yes
ENSG00000008128	0.291584	1.23649	0.03235	0.101063	no	0.00857996	0.036453	0.9493	0.978123	no
ENSG00000008130	0.0855396	0.430496	0.4486	0.680661	no	0.044117	0.221943	0.69495	0.86532	no
ENSG00000008226	0.352691	0	1	1	no	0.221276	0	1	1	no
ENSG00000008256	0.294474	1.81972	0.00105	0.00591759	yes	-0.432215	-2.69182	5e-05	0.000394466	yes
ENSG00000008277	-0.0817309	-0.448362	0.42775	0.660314	no	-0.418678	-2.21099	0.00015	0.00108114	yes
ENSG00000008283	0.117692	0.800327	0.1523	0.330027	no	0.106257	0.710269	0.20455	0.404549	no
ENSG00000008294	0.304301	1.60402	0.0031	0.0147981	yes	0.158498	0.865443	0.11615	0.270351	no
ENSG00000008394	-0.0456468	-0.330822	0.5543	0.768796	no	-0.118286	-0.854516	0.13095	0.295679	no
ENSG00000008405	0.119747	0.797361	0.16245	0.345479	no	0.223109	1.44352	0.0122	0.0460644	yes
ENSG00000008441	0.0570253	0.345755	0.5406	0.757631	no	0.178743	1.12293	0.04775	0.137144	no
ENSG00000008513	0.0246769	0.109292	0.83615	0.934468	no	0.341814	1.5262	0.0054	0.0235043	yes
ENSG00000008710	-0.204211	-0.511823	0.33565	0.565626	no	-0.273567	-0.712198	0.16675	0.351774	no
ENSG00000008869	0.162314	0.877574	0.1045	0.249979	no	0.118728	0.608155	0.26485	0.481746	no
ENSG00000009307	0.0822893	0.542391	0.31855	0.546014	no	-0.0530703	-0.372098	0.48245	0.710777	no
ENSG00000009335	0.0635358	0.324368	0.56205	0.774502	no	0.487465	2.53908	5e-05	0.000394466	yes
ENSG00000009413	-0.218768	-0.426063	0.3542	0.585607	no	0.0582907	0.0990282	0.82965	0.931867	no
ENSG00000009844	0.25844	1.73093	0.0026	0.0127622	yes	0.0291701	0.192953	0.73045	0.885045	no
ENSG00000009954	-0.068025	-0.539119	0.33025	0.559574	no	0.0838643	0.652471	0.2523	0.466268	no
ENSG00000010017	0.217713	1.11465	0.05295	0.148746	no	0.141024	0.725356	0.2033	0.402782	no
ENSG00000010244	0.095208	0.592168	0.27575	0.495598	no	0.223964	1.41961	0.00995	0.0389552	yes
ENSG00000010270	-0.00401114	-0.0315375	0.9571	0.980647	no	0.393056	3.11203	5e-05	0.000394466	yes
ENSG00000010278	-0.138367	-1.13162	0.04785	0.137345	no	0.0553884	0.455191	0.43185	0.664568	no
ENSG00000010292	-0.435244	-1.34144	0.00125	0.0068727	yes	0.0981494	0.323757	0.4431	0.675722	no
ENSG00000010318	-0.71425	-3.39487	5e-05	0.000394466	yes	-0.886256	-3.4756	5e-05	0.000394466	yes
ENSG00000010322	-0.239959	-1.28011	0.0245	0.0808728	no	-0.282443	-1.4045	0.0128	0.0479053	yes
ENSG00000010404	0.479529	2.1711	0.0001	0.000748217	yes	0.0788494	0.35106	0.5378	0.755657	no
ENSG00000010803	-0.0604843	-0.290186	0.60775	0.808633	no	-0.328859	-1.47284	0.01005	0.0392746	yes
ENSG00000010818	-0.500366	-1.00578	0.0763	0.197068	no	-1.08208	-2.42943	0.0001	0.000748217	yes
ENSG00000011007	0.352327	2.53968	5e-05	0.000394466	yes	0.562251	4.12738	5e-05	0.000394466	yes
ENSG00000011028	-0.546767	0	1	1	no	-0.969178	0	1	1	no
ENSG00000011105	0.0695162	0.320433	0.57435	0.783392	no	0.263489	1.1545	0.0424	0.125113	no
ENSG00000011114	-0.0291305	-0.174372	0.76205	0.901254	no	0.437949	2.83152	5e-05	0.000394466	yes
ENSG00000011198	0.174716	0.69949	0.2067	0.407738	no	-0.203065	-0.782529	0.16215	0.34504	no
ENSG00000011243	0.238273	1.25845	0.0279	0.0898573	no	0.418137	2.13151	0.0002	0.00139451	yes
ENSG00000011258	-0.0198289	-0.101767	0.85385	0.941724	no	0.0557878	0.299984	0.5969	0.800594	no
ENSG00000011275	0.0930962	0.613568	0.26145	0.477553	no	0.305103	2.11598	0.0003	0.00199267	yes
ENSG00000011295	-0.0238835	-0.10668	0.84865	0.939843	no	-0.111484	-0.501151	0.3715	0.60411	no
ENSG00000011304	-0.099837	-0.56636	0.31615	0.543211	no	0.139907	0.823985	0.1443	0.31726	no
ENSG00000011376	-0.225319	-1.61726	0.00235	0.0117337	yes	-0.138174	-1.02309	0.0522	0.147072	no
ENSG00000011405	0.268746	0.470517	0.29175	0.514848	no	0.288753	0.500711	0.27755	0.4978	no
ENSG00000011451	0.0461825	0.351027	0.5372	0.755178	no	0.260516	1.99593	0.00065	0.00390953	yes
ENSG00000011454	0.204295	1.06608	0.05235	0.14742	no	0.221114	1.10534	0.0519	0.146413	no
ENSG00000011485	-0.0205921	-0.12355	0.82665	0.93046	no	-8.5107e-06	-5.10697e-05	0.99995	0.99995	no
ENSG00000011523	-0.106212	-0.324166	0.54315	0.759705	no	0.0682564	0.198173	0.7058	0.871777	no
ENSG00000011566	0.304539	1.34436	0.0136	0.0502776	no	0.321712	1.42586	0.0102	0.0397458	yes
ENSG00000012048	-0.665165	-3.03556	5e-05	0.000394466	yes	-0.649328	-2.96302	5e-05	0.000394466	yes
ENSG00000012232	0.135007	0.600198	0.2736	0.492966	no	0.214199	1.01314	0.06825	0.181029	no
ENSG00000012817	-0.239433	-1.39636	0.015	0.0544323	no	-0.215765	-1.25172	0.03065	0.096861	no
ENSG00000012983	-0.132905	-0.484099	0.38775	0.621053	no	-0.320167	-1.13696	0.0393	0.118105	no
ENSG00000013306	0.163776	1.32655	0.0211	0.0717625	no	0.176952	1.42486	0.01395	0.0513317	no
ENSG00000013374	0.157327	0.878129	0.12145	0.279644	no	-0.169705	-0.934989	0.0998	0.241754	no
ENSG00000013375	0.174801	0.58778	0.26485	0.481746	no	0.256224	0.880742	0.0942	0.231418	no
ENSG00000013441	0.158166	0.920808	0.1109	0.261372	no	-0.166971	-1.01024	0.07785	0.200045	no
ENSG00000013503	0.127264	0.850527	0.1324	0.298102	no	-0.1866	-1.19158	0.03745	0.113661	no
ENSG00000013523	-0.363234	-2.51966	5e-05	0.000394466	yes	-0.292645	-1.95246	0.0007	0.00417041	yes
ENSG00000013573	-0.556472	-3.11099	5e-05	0.000394466	yes	-0.321458	-1.81241	0.00225	0.0113068	yes
ENSG00000013810	-0.33313	-1.90403	0.00075	0.00442828	yes	0.236986	1.38382	0.0175	0.0616698	no
ENSG00000014164	0.0590207	0.366407	0.5094	0.733601	no	0.357417	2.13363	0.0003	0.00199267	yes
ENSG00000014216	0.0617387	0.376543	0.49405	0.720694	no	0.0140066	0.0857822	0.87865	0.951679	no
ENSG00000014641	0.0449638	0.36286	0.5277	0.747917	no	0.246239	1.9969	0.00065	0.00390953	yes
ENSG00000014824	-0.257211	-1.66095	0.00365	0.0170029	yes	-0.486353	-3.11991	5e-05	0.000394466	yes
ENSG00000015133	-0.147113	-0.495653	0.3955	0.628612	no	0.253898	0.930613	0.1115	0.262373	no
ENSG00000015153	-0.273042	-1.12931	0.04615	0.133699	no	-0.0616024	-0.234276	0.678	0.85428	no
ENSG00000015171	0.0395348	0.29447	0.5992	0.802183	no	-0.464859	-3.41445	5e-05	0.000394466	yes
ENSG00000015479	-0.0236604	-0.12887	0.79055	0.914662	no	0.359592	1.92077	0.00015	0.00108114	yes
ENSG00000015676	-0.839511	-3.72931	5e-05	0.000394466	yes	-1.0066	-4.92213	5e-05	0.000394466	yes
ENSG00000016391	-0.129367	-0.442624	0.43825	0.670968	no	-0.379438	-1.34501	0.0169	0.0599291	no
ENSG00000016864	-0.0959669	-0.168994	0.7613	0.90092	no	-0.199352	-0.356834	0.52435	0.745357	no
ENSG00000017260	0.174077	0.923456	0.0966	0.235755	no	-0.154832	-0.809896	0.1416	0.312826	no
ENSG00000017797	0.122845	0.644634	0.2611	0.477071	no	0.478766	2.60632	5e-05	0.000394466	yes
ENSG00000018189	0.0406451	0.242198	0.67195	0.850076	no	-0.0209212	-0.115415	0.84065	0.936605	no
ENSG00000018510	-0.139995	-0.469288	0.39835	0.631276	no	-0.17093	-0.523454	0.34825	0.579489	no
ENSG00000019144	-0.119732	-0.520886	0.35585	0.587528	no	-0.286822	-1.31431	0.0216	0.0731263	no
ENSG00000019485	-0.0906993	-0.188291	0.7293	0.884309	no	0.164393	0.38346	0.47915	0.708081	no
ENSG00000019995	0.103183	0.377349	0.44085	0.673459	no	0.213198	0.781686	0.1195	0.276395	no
ENSG00000020426	-0.0747118	-0.365471	0.5183	0.740769	no	0.0768121	0.385804	0.49275	0.719521	no
ENSG00000020922	-0.537014	-2.49661	5e-05	0.000394466	yes	-0.38523	-1.66294	0.00445	0.0199963	yes
ENSG00000021574	-0.343767	-3.02001	5e-05	0.000394466	yes	-0.0677217	-0.541327	0.3452	0.576457	no
ENSG00000021762	-0.197477	-1.05701	0.06195	0.16802	no	0.198819	1.09345	0.05335	0.14968	no
ENSG00000022277	0.133701	1.06784	0.05995	0.163727	no	0.0960978	0.766192	0.1753	0.364302	no
ENSG00000022567	-0.031736	-0.120234	0.8236	0.929293	no	0.209009	0.768101	0.17775	0.367902	no
ENSG00000023191	0.202114	1.41198	0.0134	0.0496941	yes	0.00934199	0.0655804	0.90985	0.963705	no
ENSG00000023287	0.422395	2.51429	5e-05	0.000394466	yes	0.383026	2.26654	5e-05	0.000394466	yes
ENSG00000023318	-0.000117182	-0.000953996	0.99875	0.999183	no	0.197025	1.60941	0.00525	0.0229379	yes
ENSG00000023516	-0.165452	-1.39246	0.0159	0.0570293	no	0.064808	0.546708	0.34175	0.572561	no
ENSG00000023608	0.140344	0.407138	0.47765	0.706808	no	0.231511	0.658573	0.2469	0.459663	no
ENSG00000023697	-0.142726	-1.19548	0.037	0.112579	no	-0.332159	-2.53013	5e-05	0.000394466	yes
ENSG00000024048	0.125198	0.836235	0.14405	0.316873	no	0.121606	0.819393	0.1525	0.33037	no
ENSG00000025293	0.0957582	0.502914	0.3455	0.576785	no	-0.0352538	-0.172391	0.74075	0.890685	no
ENSG00000025770	-0.0688452	-0.544325	0.33895	0.569282	no	0.0547046	0.394781	0.49125	0.718125	no
ENSG00000025772	0.0477485	0.326456	0.5702	0.780393	no	0.472262	3.35755	5e-05	0.000394466	yes
ENSG00000025796	-0.165871	-0.57692	0.3091	0.5354	no	-0.345682	-1.3431	0.0193	0.0668141	no
ENSG00000025800	0.301153	1.75291	0.0022	0.0110897	yes	0.334341	2.01281	0.00065	0.00390953	yes
ENSG00000026036	0.152587	0.232374	0.68675	0.859881	no	0.328317	0.531037	0.35395	0.585368	no
ENSG00000026297	0.520314	3.09268	5e-05	0.000394466	yes	0.473402	2.80969	5e-05	0.000394466	yes
ENSG00000027697	0.0632155	0.58262	0.3029	0.528047	no	0.118487	1.05146	0.0649	0.174052	no
ENSG00000028203	0.119233	0.690383	0.2307	0.439052	no	0.0531045	0.308716	0.59545	0.79954	no
ENSG00000028310	-0.120561	-0.567853	0.3154	0.542546	no	0.0473956	0.229591	0.69135	0.862968	no
ENSG00000028839	-0.302686	-1.9973	0.0008	0.00468454	yes	0.135375	0.762462	0.1747	0.363396	no
ENSG00000029153	0.00634628	0.0382443	0.94005	0.974612	no	-0.182227	-1.20894	0.0313	0.0985496	no
ENSG00000029363	0.140149	0.685402	0.2307	0.439052	no	0.206967	1.02676	0.0703	0.185181	no
ENSG00000029364	0.0546328	0.279378	0.62385	0.819494	no	-0.0798082	-0.399333	0.4821	0.710526	no
ENSG00000029534	0.457346	0.547146	0.1943	0.390497	no	1.79932	2.49635	5e-05	0.000394466	yes
ENSG00000029639	-0.131433	-0.295957	0.5934	0.797831	no	-0.0978034	-0.224851	0.6761	0.852832	no
ENSG00000029725	0.086911	0.259551	0.5727	0.782144	no	0.404202	1.1739	0.01145	0.0437667	yes
ENSG00000030066	0.0205423	0.112525	0.83755	0.935273	no	0.361465	1.92443	0.0006	0.00365163	yes
ENSG00000030582	0.547057	4.0656	5e-05	0.000394466	yes	0.561073	4.11494	5e-05	0.000394466	yes
ENSG00000031003	0.333706	1.66686	0.0045	0.0201898	yes	0.704097	3.36742	5e-05	0.000394466	yes
ENSG00000031698	-0.352376	-2.79084	5e-05	0.000394466	yes	-1.03996	-8.19692	5e-05	0.000394466	yes
ENSG00000031823	-0.0164117	-0.0831647	0.88235	0.952781	no	0.289172	1.3061	0.0232	0.0774121	no
ENSG00000032389	-0.192471	-1.6756	0.0034	0.0160162	yes	-0.290149	-2.1667	0.00055	0.00339017	yes
ENSG00000032742	-0.1684	-1.10895	0.0529	0.148651	no	-0.468903	-2.81408	5e-05	0.000394466	yes
ENSG00000033030	-0.185417	-1.56364	0.00635	0.0269509	yes	-0.0633411	-0.533703	0.3533	0.584747	no
ENSG00000033100	0.360633	1.84043	0.0015	0.00802265	yes	0.411537	2.08343	0.0002	0.00139451	yes
ENSG00000033170	0.0343876	0.234325	0.67355	0.851011	no	-0.905635	-5.40563	5e-05	0.000394466	yes
ENSG00000033178	0.0502004	0.182727	0.75215	0.896355	no	0.183247	0.688882	0.23075	0.439132	no
ENSG00000033327	-0.0355148	-0.0237493	0.9437	0.975911	no	0.0787243	0.057281	0.86705	0.946949	no
ENSG00000033627	0.101555	0.584613	0.29865	0.522859	no	0.144537	0.887751	0.11715	0.272175	no
ENSG00000033800	0.0102003	0.0359977	0.9516	0.97889	no	0.0292878	0.102422	0.8535	0.941656	no
ENSG00000033867	-0.479915	-2.67958	5e-05	0.000394466	yes	-0.0722264	-0.405378	0.4754	0.705098	no
ENSG00000034053	-0.333398	-2.10317	0.00025	0.00169574	yes	-0.0947221	-0.618564	0.2732	0.492373	no
ENSG00000034152	0.159959	1.37081	0.01615	0.0577241	no	0.313741	2.50718	5e-05	0.000394466	yes
ENSG00000035115	-0.200456	-0.396714	0.45785	0.689295	no	-0.582517	-1.04235	0.0524	0.147523	no
ENSG00000035403	0.0247206	0.157455	0.7535	0.897115	no	0.213471	1.28369	0.00515	0.0225883	yes
ENSG00000035499	-0.859281	-6.50289	5e-05	0.000394466	yes	-0.573721	-4.45455	5e-05	0.000394466	yes
ENSG00000035681	-0.208514	-0.930504	0.10395	0.249083	no	-0.166537	-0.754816	0.1838	0.37604	no
ENSG00000035687	-0.214103	-1.57049	0.00705	0.0293726	yes	0.0780061	0.584917	0.3095	0.535825	no
ENSG00000036257	-0.0542793	-0.355078	0.5345	0.753154	no	-0.0656691	-0.423161	0.45585	0.687443	no
ENSG00000036530	0.401164	0.638169	0.1759	0.365165	no	0.0458591	0.0626996	0.894	0.956815	no
ENSG00000036549	0.085798	0.438428	0.434	0.666821	no	-0.0883027	-0.447422	0.43055	0.663194	no
ENSG00000037042	0.245862	1.80214	0.002	0.0102249	yes	-0.122448	-0.86759	0.1336	0.299974	no
ENSG00000037474	0.011613	0.0868395	0.8786	0.951679	no	0.215481	1.58706	0.0034	0.0160162	yes
ENSG00000037637	-0.15009	-0.774912	0.17335	0.361375	no	-0.53996	-2.76524	5e-05	0.000394466	yes
ENSG00000037897	-0.11894	-0.373464	0.5201	0.742083	no	-0.242219	-0.729668	0.2079	0.40926	no
ENSG00000038210	-0.440241	-1.71068	0.00255	0.0125635	yes	-0.807275	-3.62549	5e-05	0.000394466	yes
ENSG00000038274	-0.528354	-4.46804	5e-05	0.000394466	yes	0.0458143	0.364772	0.519	0.741278	no
ENSG00000038295	2.16545	5.57161	5e-05	0.000394466	yes	-0.431633	-0.974493	0.08255	0.209335	no
ENSG00000038358	0.0400192	0.174106	0.74905	0.894567	no	0.386288	1.63351	0.0053	0.0231253	yes
ENSG00000038382	-0.289589	-0.964239	0.07565	0.195855	no	0.157368	0.547481	0.31445	0.541534	no
ENSG00000038532	-0.0088774	-0.0349435	0.9424	0.97535	no	0.132329	0.571766	0.28675	0.509123	no
ENSG00000039068	0.0501884	0.335256	0.48765	0.715166	no	0.175148	1.15478	0.01765	0.0620523	no
ENSG00000039123	0.00461617	0.0184294	0.9734	0.986456	no	0.0869244	0.36145	0.5286	0.748599	no
ENSG00000039139	-0.317354	-1.56328	0.0059	0.0253499	yes	-1.11586	-4.49895	5e-05	0.000394466	yes
ENSG00000039319	0.263373	1.08686	0.0407	0.121148	no	-0.20274	-0.871221	0.0936	0.230291	no
ENSG00000039560	-0.311607	-0.71161	0.2005	0.399234	no	-0.627504	-1.39652	0.0126	0.0472942	yes
ENSG00000039650	-0.0396699	-0.279171	0.6183	0.816055	no	-0.120625	-0.828064	0.14465	0.317852	no
ENSG00000040341	-0.0809626	-0.339297	0.54995	0.765139	no	-0.262035	-1.06299	0.0606	0.165152	no
ENSG00000040487	0.0735125	0.434542	0.44305	0.675665	no	0.362701	2.14558	0.0001	0.000748217	yes
ENSG00000040933	0.219156	1.2733	0.02635	0.0857932	no	-0.286713	-1.70835	0.00375	0.0173767	yes
ENSG00000041988	0.128761	0.405998	0.46015	0.691405	no	0.0606852	0.186496	0.73675	0.888312	no
ENSG00000042088	0.0768484	0.499369	0.36645	0.598693	no	0.414174	2.61067	5e-05	0.000394466	yes
ENSG00000042286	-1.80228	-2.49601	0.0002	0.00139451	yes	-2.77432	-3.05378	5e-05	0.000394466	yes
ENSG00000042317	0.126236	0.636493	0.2497	0.462962	no	0.398898	2.39973	5e-05	0.000394466	yes
ENSG00000043093	0.197825	0.916732	0.1084	0.257044	no	-0.124952	-0.579914	0.3166	0.543765	no
ENSG00000043143	0.16958	0.607373	0.2769	0.497036	no	0.342768	1.19116	0.04115	0.122186	no
ENSG00000043514	-0.199154	-1.35624	0.01675	0.0595115	no	0.0510294	0.356318	0.5333	0.752133	no
ENSG00000044115	0.112707	0.721972	0.15005	0.326621	no	0.198052	1.16585	0.02585	0.0844582	no
ENSG00000044459	-0.518542	-4.29586	5e-05	0.000394466	yes	-0.800696	-6.37445	5e-05	0.000394466	yes
ENSG00000046651	0.413822	2.38247	5e-05	0.000394466	yes	0.40971	2.30325	0.0001	0.000748217	yes
ENSG00000047056	0.699714	3.6376	5e-05	0.000394466	yes	1.51449	8.51632	5e-05	0.000394466	yes
ENSG00000047188	-0.215985	-1.13553	0.047	0.135467	no	0.0483164	0.263137	0.6475	0.83548	no
ENSG00000047249	0.487894	3.80642	5e-05	0.000394466	yes	0.291921	2.23575	0.0001	0.000748217	yes
ENSG00000047315	-0.00603845	-0.0331397	0.94945	0.978186	no	0.0978589	0.528886	0.30765	0.533743	no
ENSG00000047346	0.278228	1.61283	0.00475	0.0211284	yes	0.638989	3.68795	5e-05	0.000394466	yes
ENSG00000047578	-0.0484796	-0.224742	0.69225	0.863644	no	0.0729952	0.339318	0.55015	0.765244	no
ENSG00000047579	-0.06174	-0.443328	0.421	0.653922	no	-0.0172499	-0.125417	0.8197	0.927842	no
ENSG00000047617	-0.238007	-0.151198	0.63895	0.829803	no	-0.734848	-0.391295	0.21075	0.413094	no
ENSG00000047621	-0.107599	-0.633666	0.27065	0.489067	no	-0.00951086	-0.0566462	0.91905	0.967253	no
ENSG00000047634	-0.732981	-5.86649	5e-05	0.000394466	yes	-0.177596	-1.3285	0.0208	0.0709426	no
ENSG00000047648	0.0895676	0.611691	0.2827	0.503968	no	0.0877652	0.59238	0.2978	0.522064	no
ENSG00000047849	-0.0285362	-0.149901	0.78275	0.9111	no	0.00121917	0.00675461	0.9901	0.993706	no
ENSG00000047932	-0.424079	-3.00794	5e-05	0.000394466	yes	-0.0670551	-0.491675	0.3875	0.620814	no
ENSG00000048405	0.0144597	0.0916068	0.8734	0.949895	no	0.203263	1.24511	0.0302	0.0956955	no
ENSG00000048471	0.304562	0.879878	0.11885	0.275317	no	0.0891837	0.366414	0.51085	0.734925	no
ENSG00000048649	0.0336639	0.142375	0.80425	0.920836	no	0.0186866	0.0793013	0.88825	0.954942	no
ENSG00000048707	0.0252344	0.0844884	0.81565	0.925679	no	-0.210327	-0.783709	0.04605	0.133493	no
ENSG00000048828	0.052185	0.336533	0.55315	0.767797	no	0.181452	1.19828	0.0345	0.10647	no
ENSG00000048991	-0.252844	-0.954142	0.07915	0.202633	no	0.212514	0.725704	0.1914	0.386323	no
ENSG00000049239	-0.112701	-0.905138	0.1112	0.261856	no	-0.466716	-3.6981	5e-05	0.000394466	yes
ENSG00000049283	-0.0223112	-0.0528454	0.92145	0.968435	no	0.350585	0.923135	0.09695	0.236422	no
ENSG00000049449	-0.573062	-3.6454	5e-05	0.000394466	yes	-0.720144	-4.55498	5e-05	0.000394466	yes
ENSG00000049618	-0.107151	-0.692267	0.22285	0.429067	no	0.0360863	0.215797	0.70555	0.871598	no
ENSG00000049656	0.0592644	0.35118	0.53185	0.751108	no	0.353616	2.19511	0.00025	0.00169574	yes
ENSG00000049759	0.574675	2.43241	5e-05	0.000394466	yes	0.304448	1.27631	0.0257	0.0840425	no
ENSG00000049769	-0.91199	-1.86694	0.00265	0.0129582	yes	-1.17493	-2.54039	5e-05	0.000394466	yes
ENSG00000049860	0.111672	0.493739	0.36745	0.599602	no	0.139043	0.618224	0.2587	0.473827	no
ENSG00000049883	-0.134512	-0.391801	0.47315	0.703117	no	-0.305286	-0.833915	0.13505	0.30225	no
ENSG00000050327	-0.145778	-0.475975	0.4089	0.641951	no	-0.0303404	-0.11109	0.84635	0.938857	no
ENSG00000050748	-0.186046	-1.19263	0.0358	0.109639	no	-0.2245	-1.44405	0.01255	0.0471385	yes
ENSG00000050820	0.195853	1.38393	0.01455	0.0531055	no	0.43824	3.06205	5e-05	0.000394466	yes
ENSG00000051009	0.0418396	0.228845	0.6839	0.858331	no	0.164309	0.93417	0.10115	0.244159	no
ENSG00000051341	-0.808533	-3.04725	5e-05	0.000394466	yes	-0.438238	-1.83657	0.0011	0.00616363	yes
ENSG00000051382	0.0487191	0.245835	0.661	0.843487	no	0.0456445	0.255047	0.654	0.839195	no
ENSG00000052126	-0.107758	-0.569419	0.3048	0.530374	no	-0.0655383	-0.36415	0.50355	0.728663	no
ENSG00000052749	0.10949	0.548665	0.31785	0.545168	no	0.0134895	0.0675857	0.9071	0.962449	no
ENSG00000052795	0.623796	2.8864	5e-05	0.000394466	yes	0.0773888	0.351206	0.5291	0.749	no
ENSG00000052841	-0.032195	-0.110499	0.841	0.93675	no	-0.17661	-0.573319	0.26685	0.484191	no
ENSG00000052850	0.077894	0.574075	0.31645	0.543626	no	-0.159685	-1.14743	0.0479	0.137432	no
ENSG00000053254	-0.0154865	-0.0468463	0.9275	0.97098	no	-0.0788878	-0.224637	0.65135	0.8378	no
ENSG00000053438	#NAME?	0	1	1	no	0.214779	0	1	1	no
ENSG00000053702	-0.173225	0	1	1	no	0.104406	0	1	1	no
ENSG00000053747	0.755797	3.55308	5e-05	0.000394466	yes	1.13487	5.17636	5e-05	0.000394466	yes
ENSG00000053770	-0.102027	-0.349546	0.5085	0.732877	no	0.0477043	0.164075	0.7607	0.90058	no
ENSG00000053900	-0.301222	-1.8705	0.00305	0.0145908	yes	-0.279975	-1.66732	0.00485	0.0214903	yes
ENSG00000053918	0.198555	0.392325	0.44885	0.680873	no	-0.626657	-1.192	0.0207	0.0706625	no
ENSG00000054116	-0.014104	-0.0689406	0.8993	0.959061	no	0.0691078	0.35094	0.532	0.751186	no
ENSG00000054118	0.146912	0.958203	0.0753	0.195186	no	0.154251	1.01725	0.065	0.17427	no
ENSG00000054267	0.483065	1.64085	0.0009	0.00518136	yes	0.454731	1.5037	0.0017	0.00891245	yes
ENSG00000054282	-0.283829	-1.80366	0.0014	0.00756525	yes	-0.106631	-0.678106	0.2323	0.441263	no
ENSG00000054523	-0.0419806	-0.223143	0.62155	0.818375	no	0.158707	0.851192	0.0636	0.171396	no
ENSG00000054598	-0.000153999	0	1	1	no	-0.00806391	0	1	1	no
ENSG00000054611	0.03449	0.266799	0.64	0.830485	no	-0.55329	-4.1741	5e-05	0.000394466	yes
ENSG00000054654	-0.245366	-0.715254	0.2045	0.404508	no	-0.0313466	-0.0941737	0.8647	0.946024	no
ENSG00000054690	0.0862821	0.310895	0.55015	0.765244	no	-0.226654	-0.755303	0.16365	0.347271	no
ENSG00000054793	0.3556	2.59907	5e-05	0.000394466	yes	-0.114082	-0.809143	0.1407	0.311509	no
ENSG00000054965	0.303472	1.74308	0.00285	0.0137829	yes	0.337999	1.96468	0.00085	0.00494128	yes
ENSG00000054967	-0.209172	-1.2102	0.02765	0.0892077	no	0.273891	1.72801	0.0025	0.0123557	yes
ENSG00000055044	-0.205288	-1.44719	0.01305	0.0486372	yes	0.0289782	0.205246	0.7219	0.880735	no
ENSG00000055070	0.204677	1.34995	0.01705	0.060376	no	0.495175	3.24974	5e-05	0.000394466	yes
ENSG00000055118	0.328974	2.47411	5e-05	0.000394466	yes	0.216125	1.60475	0.00565	0.0244483	yes
ENSG00000055130	-0.201037	-1.62663	0.0036	0.0168082	yes	0.101119	0.825974	0.15065	0.327464	no
ENSG00000055147	-0.0436869	-0.122894	0.8236	0.929293	no	-0.368218	-0.931512	0.0926	0.228419	no
ENSG00000055163	-0.0526091	-0.293186	0.58365	0.790248	no	-0.431857	-2.2823	5e-05	0.000394466	yes
ENSG00000055208	0.11985	0.729914	0.19945	0.397801	no	0.243393	1.47483	0.0074	0.0305641	yes
ENSG00000055332	0.24178	0.981956	0.08255	0.209335	no	-0.385121	-1.47566	0.0096	0.0379146	yes
ENSG00000055483	0.126147	0.464845	0.382	0.615224	no	0.511064	1.49235	0.006	0.0256898	yes
ENSG00000055609	0.267006	0.621023	0.284	0.505651	no	0.333925	0.794168	0.1654	0.349899	no
ENSG00000055917	-0.0918328	-0.424797	0.4588	0.690181	no	0.0849272	0.389465	0.49555	0.72201	no
ENSG00000056097	0.09262	0.636976	0.2492	0.462468	no	0.0522988	0.363007	0.51415	0.737469	no
ENSG00000056277	-0.0675952	-0.399613	0.47305	0.703044	no	0.16577	1.0523	0.0678	0.180103	no
ENSG00000056487	-0.548372	-0.43386	0.2383	0.448995	no	-1.1996	-0.78494	0.0169	0.0599291	no
ENSG00000056998	0.0109592	0.0687266	0.9029	0.960643	no	-0.264559	-1.40579	0.0189	0.0656509	no
ENSG00000057252	0.242853	1.39972	0.01545	0.0557692	no	-0.236724	-1.32469	0.02115	0.0719061	no
ENSG00000057468	0.232602	0.646117	0.2644	0.481085	no	0.284373	0.792416	0.16595	0.35066	no
ENSG00000057608	0.000469543	0.00391157	0.99385	0.99608	no	0.034132	0.283909	0.6177	0.815613	no
ENSG00000057663	-0.104962	-0.654363	0.2518	0.465702	no	0.178598	1.09112	0.05585	0.154905	no
ENSG00000057935	0.226157	1.59129	0.00605	0.0258719	yes	0.173377	1.19787	0.0369	0.112318	no
ENSG00000058056	-0.148672	-0.974302	0.0847	0.213487	no	0.102356	0.675064	0.23325	0.442537	no
ENSG00000058085	1.34483	0	1	1	no	1.82187	0.941378	0.00495	0.0218443	yes
ENSG00000058091	0.345633	0.837905	0.1273	0.289621	no	0.187829	0.462617	0.40055	0.633511	no
ENSG00000058262	0.104314	0.664303	0.2089	0.410616	no	0.150645	0.951872	0.07315	0.190872	no
ENSG00000058272	0.3331	1.19002	0.03885	0.11707	no	0.268899	0.89703	0.11365	0.266255	no
ENSG00000058404	-0.269282	-1.7676	0.0012	0.00663203	yes	-0.0993654	-0.611262	0.2652	0.482176	no
ENSG00000058600	-0.142979	-0.774252	0.1766	0.366247	no	-0.00155665	-0.00844219	0.9889	0.993186	no
ENSG00000058673	-0.0892803	-0.402128	0.43955	0.671955	no	0.0493269	0.228269	0.668	0.848023	no
ENSG00000058729	0.100864	0.500107	0.3847	0.617775	no	0.396412	1.99671	0.0004	0.00256373	yes
ENSG00000058799	0.10121	0.91184	0.11115	0.261794	no	-0.0189174	-0.173014	0.7634	0.901979	no
ENSG00000058804	-0.613543	-4.59493	5e-05	0.000394466	yes	-0.206838	-1.54971	0.0067	0.0282137	yes
ENSG00000059122	0.106524	0.556947	0.30345	0.528772	no	0.189141	0.917668	0.10565	0.252023	no
ENSG00000059145	-0.241783	-0.736492	0.101	0.243904	no	0.0510157	0.141022	0.74605	0.893238	no
ENSG00000059378	0.300843	1.82886	0.00175	0.0091262	yes	0.00845734	0.05816	0.9195	0.967487	no
ENSG00000059573	-0.160161	-1.14477	0.04605	0.133493	no	-0.000215105	-0.00159689	0.998	0.998703	no
ENSG00000059588	-0.0287661	-0.126799	0.81745	0.926678	no	-0.3282	-1.45337	0.01215	0.0459257	yes
ENSG00000059691	-0.393112	-3.03436	5e-05	0.000394466	yes	-0.211829	-1.76273	0.002	0.0102249	yes
ENSG00000059758	0.241172	1.56603	0.00645	0.0273313	yes	0.159727	1.04268	0.0625	0.169049	no
ENSG00000060069	0.0219008	0.14707	0.7957	0.917171	no	0.325318	2.39765	5e-05	0.000394466	yes
ENSG00000060138	-0.13999	-0.95462	0.09255	0.228418	no	-0.0231717	-0.155678	0.7858	0.912655	no
ENSG00000060237	0.464847	1.46716	0.00995	0.0389552	yes	0.324373	1.0407	0.06705	0.178573	no
ENSG00000060339	0.00303463	0.0175263	0.97705	0.988148	no	0.0225866	0.120766	0.82975	0.931923	no
ENSG00000060642	-0.192492	-1.59519	0.005	0.0220281	yes	-0.617311	-4.72207	5e-05	0.000394466	yes
ENSG00000060656	-0.241939	-1.23857	0.0289	0.0923743	no	-0.405156	-1.70286	0.00505	0.0222042	yes
ENSG00000060749	-0.475565	-2.21663	0.0001	0.000748217	yes	-0.191419	-0.915571	0.07115	0.186886	no
ENSG00000061273	-0.101724	-0.338055	0.52535	0.746248	no	0.0484722	0.155926	0.7679	0.90396	no
ENSG00000061676	0.0340631	0.215082	0.6833	0.858123	no	0.181545	1.13643	0.0319	0.100058	no
ENSG00000061936	-0.047845	-0.253716	0.65595	0.840412	no	0.195083	0.908728	0.1089	0.257876	no
ENSG00000061938	0.129534	0.714917	0.208	0.40937	no	-0.206219	-1.11713	0.0483	0.1383	no
ENSG00000061987	-0.0776614	-0.374081	0.49745	0.723712	no	-0.153666	-0.783117	0.16045	0.342462	no
ENSG00000062194	0.0348624	0.234245	0.6829	0.857951	no	0.0693863	0.459404	0.4271	0.659697	no
ENSG00000062485	-0.276942	-1.18264	0.02535	0.0830942	no	0.0349382	0.154782	0.77385	0.906935	no
ENSG00000062650	0.00778835	0.046505	0.9351	0.973196	no	0.286415	1.80574	0.0024	0.0119296	yes
ENSG00000062716	0.302825	0.704579	0.187	0.380506	no	0.203617	0.448961	0.398	0.630992	no
ENSG00000063046	0.127584	0.914129	0.09795	0.238179	no	0.322145	2.29333	5e-05	0.000394466	yes
ENSG00000063127	-0.49767	-0.549638	0.24715	0.460051	no	0.478858	0.615809	0.187	0.380506	no
ENSG00000063169	0.605228	1.3077	0.02915	0.0930391	no	0.654057	1.40117	0.0199	0.0684973	no
ENSG00000063176	0.132082	0.132735	0.80165	0.919609	no	0.169675	0.173592	0.7475	0.893949	no
ENSG00000063244	0.252135	1.75645	0.00215	0.0108713	yes	0.396802	2.81999	5e-05	0.000394466	yes
ENSG00000063245	0.86519	6.61025	5e-05	0.000394466	yes	1.21373	9.45273	5e-05	0.000394466	yes
ENSG00000063438	-0.360145	-0.141394	0.5469	0.76267	no	-0.428641	-0.138176	0.5234	0.74449	no
ENSG00000063587	-0.196512	-1.49762	0.0095	0.0376082	yes	0.242418	2.0198	0.0005	0.00312122	yes
ENSG00000063601	0.0374725	0.18691	0.74285	0.891642	no	0.304083	1.51846	0.00855	0.0344758	yes
ENSG00000063761	-0.0282552	-0.166744	0.7678	0.903919	no	-0.830911	-4.52787	5e-05	0.000394466	yes
ENSG00000063854	-0.399325	-1.84689	0.00135	0.00733226	yes	-0.784642	-3.38931	5e-05	0.000394466	yes
ENSG00000063978	0.124087	0.650646	0.2438	0.455699	no	0.338018	1.70882	0.0018	0.00935173	yes
ENSG00000064042	0.620216	2.76462	5e-05	0.000394466	yes	0.39437	1.77992	0.0017	0.00891245	yes
ENSG00000064102	0.093521	0.457622	0.4237	0.656422	no	0.266436	1.466	0.0093	0.0369299	yes
ENSG00000064115	-0.00284708	-0.0118715	0.98385	0.990899	no	-0.829706	-3.8266	5e-05	0.000394466	yes
ENSG00000064270	-0.192696	-0.978572	0.0862	0.216401	no	-0.47028	-2.37583	5e-05	0.000394466	yes
ENSG00000064309	-0.188343	-1.1402	0.04755	0.136711	no	-0.620142	-3.51774	5e-05	0.000394466	yes
ENSG00000064313	-0.155793	-0.81724	0.1545	0.333386	no	0.130281	0.594729	0.2915	0.514571	no
ENSG00000064393	0.022413	0.13308	0.81305	0.924471	no	0.328416	2.04088	0.0004	0.00256373	yes
ENSG00000064419	-0.072734	-0.604475	0.29835	0.522598	no	0.0689487	0.58033	0.31585	0.54295	no
ENSG00000064545	0.00304023	0.0165447	0.97675	0.987971	no	-0.0363668	-0.214766	0.6923	0.863667	no
ENSG00000064651	0.0500821	0.281455	0.59755	0.801136	no	-0.419531	-2.32702	0.00035	0.00228343	yes
ENSG00000064932	0.154526	0.741732	0.2001	0.398724	no	0.210146	1.02456	0.07625	0.196984	no
ENSG00000064933	-0.673069	-3.79802	5e-05	0.000394466	yes	-0.749599	-4.87377	5e-05	0.000394466	yes
ENSG00000064999	-0.30008	-2.22817	0.0001	0.000748217	yes	-0.0679878	-0.50586	0.3725	0.605328	no
ENSG00000065000	0.240479	1.13124	0.0326	0.101695	no	0.320633	1.53887	0.00285	0.0137829	yes
ENSG00000065054	-0.0477871	-0.423958	0.45935	0.690596	no	0.312141	2.67364	5e-05	0.000394466	yes
ENSG00000065060	-0.103063	-0.740754	0.1938	0.389845	no	-0.501038	-3.50941	5e-05	0.000394466	yes
ENSG00000065135	0.258287	2.17853	0.0001	0.000748217	yes	0.317225	2.67682	5e-05	0.000394466	yes
ENSG00000065183	0.0651437	0.290623	0.61055	0.810617	no	0.280194	1.25535	0.0268	0.0870179	no
ENSG00000065243	0.190466	0.93077	0.0803	0.204886	no	0.294683	1.47088	0.00585	0.0251702	yes
ENSG00000065413	0.800382	2.81852	5e-05	0.000394466	yes	-0.204505	-0.694608	0.2074	0.408712	no
ENSG00000065485	-0.376282	-2.17508	0.00025	0.00169574	yes	0.095976	0.502783	0.381	0.614024	no
ENSG00000065491	-0.160683	-1.27649	0.0265	0.0862359	no	-0.0305432	-0.24675	0.66575	0.846564	no
ENSG00000065518	0.223466	1.88239	0.0011	0.00616363	yes	0.0165292	0.139092	0.8125	0.924339	no
ENSG00000065526	0.0829697	0.277612	0.62475	0.820132	no	0.105929	0.354684	0.5329	0.751862	no
ENSG00000065534	0.875624	2.43423	5e-05	0.000394466	yes	1.14809	3.273	5e-05	0.000394466	yes
ENSG00000065559	0.278314	1.56878	0.0067	0.0282137	yes	0.347347	1.84161	0.00155	0.00824944	yes
ENSG00000065600	-0.180065	-1.11427	0.0515	0.145477	no	0.110165	0.727998	0.20445	0.404453	no
ENSG00000065613	0.104491	0.56449	0.3114	0.538055	no	0.130711	0.723883	0.1977	0.395421	no
ENSG00000065665	0.364272	0.423379	0.36555	0.597911	no	0.502717	0.524926	0.2673	0.484833	no
ENSG00000065802	0.312958	1.30782	0.0235	0.0782434	no	0.406334	1.7308	0.0023	0.0115225	yes
ENSG00000065809	-0.645179	-3.478	5e-05	0.000394466	yes	-0.634724	-3.17135	5e-05	0.000394466	yes
ENSG00000065833	0.0652359	0.500865	0.3755	0.608222	no	0.505415	3.90469	5e-05	0.000394466	yes
ENSG00000065882	0.47106	2.51482	5e-05	0.000394466	yes	0.327102	1.76318	0.00175	0.0091262	yes
ENSG00000065883	-0.0476045	-0.330051	0.5605	0.773579	no	0.105994	0.743233	0.187	0.380506	no
ENSG00000065923	0.443615	2.36093	0.0001	0.000748217	yes	0.0914026	0.497285	0.3767	0.609381	no
ENSG00000065978	-0.073412	-0.626225	0.2709	0.489407	no	0.368884	3.14431	5e-05	0.000394466	yes
ENSG00000065989	-0.480013	-0.353232	0.4872	0.714714	no	0.276501	0.226751	0.6639	0.845298	no
ENSG00000066027	0.582709	4.43091	5e-05	0.000394466	yes	0.817033	6.1941	5e-05	0.000394466	yes
ENSG00000066044	-0.172391	-1.14144	0.0458	0.132963	no	0.100943	0.657632	0.25005	0.463394	no
ENSG00000066084	0.358042	2.47672	5e-05	0.000394466	yes	0.29636	1.95997	0.0001	0.000748217	yes
ENSG00000066135	-0.107654	-0.605091	0.27315	0.492315	no	-0.0212561	-0.119966	0.82575	0.930014	no
ENSG00000066136	0.0531998	0.324381	0.56595	0.777015	no	-0.129207	-0.83495	0.13965	0.309828	no
ENSG00000066279	-0.631343	-4.96039	5e-05	0.000394466	yes	-0.216911	-1.76823	0.00175	0.0091262	yes
ENSG00000066322	0.0637106	0.480447	0.4036	0.636427	no	0.285077	2.15997	5e-05	0.000394466	yes
ENSG00000066455	0.144971	1.16715	0.0401	0.119839	no	-0.0428669	-0.339487	0.5474	0.763067	no
ENSG00000066468	-0.623401	-3.4645	5e-05	0.000394466	yes	0.626592	4.22075	5e-05	0.000394466	yes
ENSG00000066557	-0.0568557	-0.45891	0.42445	0.65718	no	0.203018	1.64297	0.00405	0.0185143	yes
ENSG00000066629	0.191887	0.894692	0.11585	0.269914	no	0.37255	1.52226	0.0142	0.0520648	no
ENSG00000066651	-0.310059	-1.97996	0.00115	0.00640105	yes	-0.0546728	-0.353987	0.51315	0.736646	no
ENSG00000066739	0.164575	0.38319	0.38485	0.617927	no	-0.548142	-1.20969	0.00985	0.0386484	yes
ENSG00000066777	0.178647	0.510199	0.35145	0.582835	no	-0.00249355	-0.00655158	0.98895	0.993211	no
ENSG00000066827	-0.0840106	-0.437937	0.4216	0.654524	no	-0.0947602	-0.51961	0.3441	0.57528	no
ENSG00000066855	-0.0613457	-0.340883	0.54785	0.763291	no	0.160028	0.906282	0.10005	0.242158	no
ENSG00000066926	-0.0700172	-0.411638	0.46755	0.698111	no	-0.0437417	-0.265076	0.6382	0.829283	no
ENSG00000066933	0.132086	0.34054	0.54205	0.75876	no	0.257501	0.656957	0.2392	0.450048	no
ENSG00000067048	0.322723	1.51588	0.00865	0.0347903	yes	0.466568	2.15355	0.0003	0.00199267	yes
ENSG00000067057	-0.105662	-0.583173	0.30775	0.533796	no	-0.198089	-1.10454	0.0514	0.145276	no
ENSG00000067064	0.474847	2.3704	5e-05	0.000394466	yes	0.617531	3.03775	5e-05	0.000394466	yes
ENSG00000067141	-0.125227	-0.50726	0.3571	0.589012	no	-0.149746	-0.710253	0.2026	0.401941	no
ENSG00000067167	0.0103217	0.0728063	0.901	0.959834	no	-0.20441	-1.42713	0.01435	0.0525001	no
ENSG00000067177	-0.622312	-5.36089	5e-05	0.000394466	yes	-0.893312	-7.59749	5e-05	0.000394466	yes
ENSG00000067182	-0.044133	-0.298335	0.60715	0.808215	no	-0.167877	-1.11329	0.05105	0.144449	no
ENSG00000067208	0.214043	0.874934	0.1193	0.27607	no	-0.458272	-2.11742	0.0006	0.00365163	yes
ENSG00000067225	0.306128	2.48308	5e-05	0.000394466	yes	0.287996	2.33998	5e-05	0.000394466	yes
ENSG00000067369	0.00635069	0.0264696	0.9631	0.982561	no	0.218938	0.959247	0.08215	0.208588	no
ENSG00000067560	0.0092196	0.0715849	0.90175	0.960174	no	-0.205428	-1.60458	0.00505	0.0222042	yes
ENSG00000067606	0.15254	0.732131	0.17215	0.359767	no	0.276607	1.38491	0.0088	0.0352656	yes
ENSG00000067646	0.375449	1.85017	0.0022	0.0110897	yes	0.0251632	0.140101	0.80615	0.921526	no
ENSG00000067900	0.169614	0.600905	0.2868	0.509179	no	0.207362	0.726137	0.20125	0.400238	no
ENSG00000067955	-0.0758453	-0.331686	0.5728	0.782154	no	0.107873	0.51954	0.3679	0.600053	no
ENSG00000067992	-0.0818716	-0.685021	0.23385	0.44328	no	0.0502974	0.432434	0.45075	0.682708	no
ENSG00000068024	-1.49998	-3.07445	5e-05	0.000394466	yes	-2.41673	-2.90016	5e-05	0.000394466	yes
ENSG00000068028	-0.18634	-1.68697	0.0036	0.0168082	yes	-0.21082	-1.91241	0.0009	0.00518136	yes
ENSG00000068305	0.0185733	0.0790835	0.8888	0.955128	no	-0.409312	-1.67476	0.0038	0.0175716	yes
ENSG00000068308	0.186627	1.21213	0.03505	0.107873	no	0.0803065	0.56228	0.31395	0.541009	no
ENSG00000068383	0.372893	2.42623	5e-05	0.000394466	yes	0.195229	1.2693	0.02405	0.0797152	no
ENSG00000068438	-0.0794877	-0.55041	0.33375	0.563711	no	-0.0181232	-0.128699	0.8157	0.925679	no
ENSG00000068650	0.0826688	0.276949	0.61505	0.813958	no	-0.300053	-0.962876	0.0877	0.219242	no
ENSG00000068654	-0.130774	-0.593556	0.19975	0.398242	no	0.151233	0.699443	0.12685	0.288823	no
ENSG00000068745	0.307937	2.32242	5e-05	0.000394466	yes	0.353517	2.66932	5e-05	0.000394466	yes
ENSG00000068784	-0.0736217	-0.419071	0.4616	0.692681	no	0.341756	1.78113	0.0013	0.00709758	yes
ENSG00000068796	-0.238399	-0.758654	0.13755	0.306396	no	0.184567	0.633134	0.22775	0.435473	no
ENSG00000068878	0.161879	0.748937	0.1629	0.346184	no	0.282945	1.29627	0.0184	0.0642	no
ENSG00000068885	-0.17649	-0.472305	0.35195	0.583245	no	-0.72861	-1.69487	0.0014	0.00756525	yes
ENSG00000069011	0.671335	1.94764	0.0011	0.00616363	yes	0.241406	0.648551	0.25125	0.464995	no
ENSG00000069020	0.644218	2.00107	0.00035	0.00228343	yes	0.148424	0.441076	0.4089	0.641951	no
ENSG00000069206	-0.0485966	-0.39575	0.48505	0.71292	no	1.23291	10.2413	5e-05	0.000394466	yes
ENSG00000069329	0.0894712	0.498671	0.3626	0.594772	no	0.0714707	0.377304	0.5	0.725459	no
ENSG00000069345	0.106966	0.861926	0.12835	0.291352	no	0.158665	1.27427	0.0254	0.0832285	no
ENSG00000069424	-0.0247966	-0.106679	0.85225	0.941215	no	0.213395	0.771294	0.16835	0.354151	no
ENSG00000069493	-0.421015	-0.72889	0.0855	0.215092	no	-0.545933	-0.866027	0.04625	0.133891	no
ENSG00000069667	0.127733	0.383632	0.4834	0.711514	no	-0.041663	-0.128243	0.8096	0.922936	no
ENSG00000069696	-0.827368	0	1	1	no	-2.61732	0	1	1	no
ENSG00000069702	0.309363	1.3934	0.0145	0.0529649	no	0.279498	1.2932	0.0219	0.0739656	no
ENSG00000069849	0.0525239	0.381911	0.50255	0.727729	no	0.32702	2.42492	5e-05	0.000394466	yes
ENSG00000069869	0.332884	1.40511	0.0123	0.0463882	yes	-0.523893	-1.75793	0.0032	0.0151942	yes
ENSG00000069943	0.0298161	0.0804254	0.8908	0.955923	no	-0.0499588	-0.132074	0.82575	0.930014	no
ENSG00000069956	0.176446	0.809153	0.13835	0.307609	no	-0.759565	-3.36729	5e-05	0.000394466	yes
ENSG00000069966	0.44276	1.37605	0.0129	0.0482046	yes	-0.106048	-0.307134	0.57925	0.787042	no
ENSG00000069974	-0.0294811	-0.0716657	0.89405	0.956815	no	0.688032	1.88355	0.0013	0.00709758	yes
ENSG00000069998	0.0416884	0.341972	0.54845	0.763915	no	0.404666	3.32423	5e-05	0.000394466	yes
ENSG00000070018	0.0711923	0.27547	0.6201	0.817484	no	0.128632	0.521012	0.3439	0.575067	no
ENSG00000070047	0.080048	0.580786	0.3024	0.527507	no	0.26948	1.93224	0.0013	0.00709758	yes
ENSG00000070061	0.57306	4.2914	5e-05	0.000394466	yes	0.654898	5.00402	5e-05	0.000394466	yes
ENSG00000070081	0.663044	4.57504	5e-05	0.000394466	yes	0.300202	2.07231	0.0002	0.00139451	yes
ENSG00000070087	0.288238	1.61923	0.0052	0.0227715	yes	0.496973	2.6613	5e-05	0.000394466	yes
ENSG00000070159	-0.0130906	-0.0620278	0.9143	0.965828	no	0.17221	0.752359	0.18215	0.373838	no
ENSG00000070214	0.367414	2.23223	5e-05	0.000394466	yes	0.339334	2.07913	5e-05	0.000394466	yes
ENSG00000070366	0.0358607	0.0502375	0.88895	0.955176	no	-0.0101892	-0.0144507	0.967	0.983461	no
ENSG00000070367	0.08875	0.439403	0.4312	0.663863	no	0.371262	1.84011	0.0013	0.00709758	yes
ENSG00000070371	-0.0788694	-0.352635	0.50185	0.727115	no	-0.159556	-0.680952	0.20935	0.411165	no
ENSG00000070413	0.0710563	0.354853	0.53545	0.753847	no	0.241368	1.21338	0.03255	0.101579	no
ENSG00000070423	-0.000428074	-0.00321698	0.99515	0.996838	no	0.16318	1.27485	0.0252	0.0826808	no
ENSG00000070444	-0.084219	-0.386847	0.48845	0.715903	no	0.103355	0.491512	0.3798	0.612749	no
ENSG00000070476	0.178774	1.39156	0.01455	0.0531055	no	-0.0266832	-0.2078	0.72155	0.880483	no
ENSG00000070614	-0.203273	-0.815872	0.1442	0.31709	no	0.232592	0.9241	0.102	0.245686	no
ENSG00000070669	-0.69793	-5.12817	5e-05	0.000394466	yes	-1.4247	-10.4305	5e-05	0.000394466	yes
ENSG00000070761	-0.635756	-4.46498	5e-05	0.000394466	yes	0.0207591	0.145588	0.7974	0.918042	no
ENSG00000070770	-0.0629211	-0.351776	0.53515	0.753616	no	0.115172	0.612405	0.28	0.500702	no
ENSG00000070831	0.0557911	0.458987	0.432	0.664707	no	0.302228	2.45972	5e-05	0.000394466	yes
ENSG00000070882	-0.473208	-2.34821	5e-05	0.000394466	yes	-0.145273	-0.595638	0.27515	0.494825	no
ENSG00000070950	-0.567122	-3.09856	5e-05	0.000394466	yes	-0.205666	-0.883951	0.1197	0.276695	no
ENSG00000071051	-0.427659	-2.28884	0.00015	0.00108114	yes	-0.484907	-3.04949	5e-05	0.000394466	yes
ENSG00000071054	-0.138471	-0.93511	0.07955	0.203403	no	-0.0919422	-0.623293	0.2405	0.451681	no
ENSG00000071082	-0.0566632	-0.398165	0.48325	0.71135	no	0.228641	1.61405	0.0043	0.0194374	yes
ENSG00000071127	0.203828	1.38284	0.0135	0.0499847	yes	0.279643	1.93558	0.0007	0.00417041	yes
ENSG00000071189	0.240181	1.4373	0.01245	0.0468391	yes	0.208539	1.19262	0.0336	0.104221	no
ENSG00000071205	-0.201406	-1.44232	0.01315	0.0489374	yes	0.286916	2.05558	0.0002	0.00139451	yes
ENSG00000071242	-0.453568	-1.33085	0.0168	0.0596662	no	-0.520269	-1.27908	0.0223	0.0750329	no
ENSG00000071462	0.230012	1.50475	0.00795	0.0324295	yes	0.464887	3.07701	5e-05	0.000394466	yes
ENSG00000071537	-0.0470879	-0.177629	0.75435	0.897529	no	0.200317	0.798297	0.162	0.34488	no
ENSG00000071539	-0.405452	-1.56914	0.00365	0.0170029	yes	0.177451	0.748566	0.15075	0.327591	no
ENSG00000071564	-0.535035	-3.27001	5e-05	0.000394466	yes	-0.0946265	-0.536829	0.3395	0.569894	no
ENSG00000071626	-0.132831	-0.705256	0.21485	0.418435	no	0.29842	1.67103	0.00335	0.0158116	yes
ENSG00000071655	-0.231558	-1.0912	0.05175	0.146086	no	-0.512833	-2.43024	5e-05	0.000394466	yes
ENSG00000071859	0.278839	2.10194	0.00045	0.00285055	yes	0.292168	2.16542	0.00015	0.00108114	yes
ENSG00000072042	0.292823	2.023	0.0003	0.00199267	yes	-0.316807	-2.13437	0.00015	0.00108114	yes
ENSG00000072071	-0.00412763	-0.0183645	0.9724	0.986038	no	0.0876557	0.407245	0.4619	0.692925	no
ENSG00000072110	0.125869	0.835872	0.1215	0.279724	no	0.331935	2.26525	5e-05	0.000394466	yes
ENSG00000072133	-0.0414134	-0.300454	0.60275	0.804853	no	-0.358128	-2.6333	5e-05	0.000394466	yes
ENSG00000072134	-0.414722	-1.97807	0.00095	0.00542971	yes	0.0364924	0.159706	0.77995	0.909619	no
ENSG00000072135	-0.124621	-0.678727	0.23835	0.449044	no	-0.313966	-1.70474	0.00335	0.0158116	yes
ENSG00000072210	0.248784	1.44917	0.01075	0.0415701	yes	-0.0518993	-0.311391	0.58445	0.790809	no
ENSG00000072310	0.192999	0.876894	0.1249	0.285392	no	0.507455	2.3736	5e-05	0.000394466	yes
ENSG00000072364	0.183487	0.767438	0.1464	0.320604	no	0.0989135	0.415783	0.43135	0.664002	no
ENSG00000072401	-0.434277	-2.96069	5e-05	0.000394466	yes	0.130089	0.858138	0.13215	0.297624	no
ENSG00000072415	0.302327	0.958373	0.0402	0.120073	no	0.349551	1.02164	0.0279	0.0898573	no
ENSG00000072501	-0.334746	-1.50277	0.00965	0.0380578	yes	-0.00733987	-0.0326995	0.95475	0.979747	no
ENSG00000072518	0.152177	0.864385	0.12815	0.291053	no	0.220072	1.21324	0.0325	0.101451	no
ENSG00000072609	-0.0272732	-0.0538276	0.9095	0.963574	no	0.0914189	0.178647	0.7144	0.876878	no
ENSG00000072682	0.392011	1.63269	0.00335	0.0158116	yes	-0.581449	-2.14456	0.00025	0.00169574	yes
ENSG00000072736	-0.131405	-0.388872	0.448	0.680291	no	0.184263	0.560534	0.27615	0.49614	no
ENSG00000072756	0.282246	1.51774	0.00755	0.0310586	yes	0.0590002	0.314015	0.5769	0.785255	no
ENSG00000072778	0.252836	1.60454	0.0036	0.0168082	yes	-0.223303	-1.40135	0.0122	0.0460644	yes
ENSG00000072786	-0.46631	-1.10357	0.02785	0.089738	no	-0.0433749	-0.0968706	0.8478	0.939446	no
ENSG00000072803	-0.0680135	-0.418688	0.43775	0.670425	no	0.255217	1.52594	0.00555	0.0240664	yes
ENSG00000072840	-0.128722	-0.574106	0.3212	0.549213	no	-0.226224	-0.811058	0.14715	0.321903	no
ENSG00000072958	-0.156821	-1.02608	0.06415	0.172526	no	0.127553	0.838921	0.12835	0.291352	no
ENSG00000073060	-0.184409	-1.38391	0.01765	0.0620523	no	0.196325	1.43206	0.01245	0.0468391	yes
ENSG00000073169	-0.099879	-0.86428	0.13	0.294121	no	-0.492847	-4.02604	5e-05	0.000394466	yes
ENSG00000073350	0.225431	1.18192	0.03785	0.114656	no	0.531398	2.90884	5e-05	0.000394466	yes
ENSG00000073417	-0.116279	-0.643267	0.2446	0.456794	no	-0.120805	-0.739606	0.1833	0.375377	no
ENSG00000073614	0.17934	0.579714	0.27615	0.49614	no	0.384077	1.25722	0.0208	0.0709426	no
ENSG00000073711	0.0256269	0.163071	0.76785	0.90394	no	0.11654	0.64073	0.2638	0.480372	no
ENSG00000073803	0.178172	0.870573	0.12595	0.287211	no	0.387003	2.00642	0.0005	0.00312122	yes
ENSG00000073849	-0.693285	-1.85704	0.00035	0.00228343	yes	-1.33167	-2.92197	5e-05	0.000394466	yes
ENSG00000073910	0.0479757	0.179096	0.75215	0.896355	no	-0.451321	-1.66362	0.00355	0.0166083	yes
ENSG00000073921	0.112449	0.676417	0.2352	0.44488	no	0.274819	1.6398	0.00425	0.0192412	yes
ENSG00000074054	-0.132995	-0.459276	0.4232	0.655868	no	-0.135642	-0.464102	0.4204	0.65343	no
ENSG00000074181	0.160781	0.629717	0.26115	0.477099	no	0.229589	0.870623	0.12485	0.285325	no
ENSG00000074211	-0.00878063	-0.0672269	0.9031	0.960764	no	-0.10798	-0.795437	0.15785	0.338543	no
ENSG00000074219	-0.0857848	-0.413798	0.44825	0.680522	no	0.465715	2.11272	0.00025	0.00169574	yes
ENSG00000074266	-0.0193786	-0.157652	0.77675	0.908105	no	0.266778	2.30387	5e-05	0.000394466	yes
ENSG00000074356	0.126136	0.581339	0.28745	0.50981	no	0.294279	1.32255	0.02065	0.0705179	no
ENSG00000074657	0.358833	1.48766	0.0082	0.0332948	yes	0.692506	2.93079	5e-05	0.000394466	yes
ENSG00000074695	-0.38692	-2.46095	5e-05	0.000394466	yes	0.186106	1.17884	0.02005	0.0689237	no
ENSG00000074696	-0.0723899	-0.604802	0.28555	0.507611	no	-0.220676	-1.8218	0.00105	0.00591759	yes
ENSG00000074706	-1.15816	-0.486136	0.05425	0.151568	no	-0.0872269	-0.050019	0.8652	0.946198	no
ENSG00000074755	0.283532	1.13767	0.0397	0.11901	no	0.139677	0.559511	0.3219	0.550054	no
ENSG00000074800	0.304352	2.54349	5e-05	0.000394466	yes	0.216359	1.80087	0.0016	0.00848051	yes
ENSG00000075073	-0.272936	0	1	1	no	-0.588401	0	1	1	no
ENSG00000075151	-1.22092	-7.43352	5e-05	0.000394466	yes	-2.10286	-10.5455	5e-05	0.000394466	yes
ENSG00000075218	-0.540648	-4.03613	5e-05	0.000394466	yes	0.117005	0.888629	0.1221	0.280743	no
ENSG00000075223	0.196572	1.1279	0.04025	0.120177	no	1.50702	9.0024	5e-05	0.000394466	yes
ENSG00000075239	0.0612685	0.384843	0.485	0.712884	no	0.0221954	0.141869	0.798	0.918332	no
ENSG00000075240	-0.488662	-1.4202	0.00955	0.0377414	yes	-0.972544	-2.61574	5e-05	0.000394466	yes
ENSG00000075275	0.0502971	0.213006	0.69805	0.867168	no	-0.189409	-0.858679	0.13335	0.299559	no
ENSG00000075292	0.20264	0.853526	0.1279	0.29064	no	0.0206418	0.0851935	0.8798	0.952125	no
ENSG00000075303	-0.17382	-0.494159	0.38375	0.616876	no	-0.297284	-0.805176	0.15035	0.327043	no
ENSG00000075336	-0.281728	-2.49469	5e-05	0.000394466	yes	0.473139	3.77937	5e-05	0.000394466	yes
ENSG00000075391	-0.376988	-1.87336	0.001	0.00567333	yes	0.153802	0.770848	0.1837	0.375946	no
ENSG00000075407	-0.0995199	-0.503698	0.3492	0.580459	no	-0.254083	-1.29147	0.0187	0.0650828	no
ENSG00000075413	0.0324353	0.208437	0.7151	0.877096	no	0.217214	1.3921	0.01585	0.0568794	no
ENSG00000075415	-0.0919208	-0.766409	0.18045	0.371616	no	0.0814215	0.680376	0.2329	0.4421	no
ENSG00000075420	0.469732	1.66192	0.0036	0.0168082	yes	0.383609	1.26731	0.02635	0.0857932	no
ENSG00000075539	-0.0942332	-0.292225	0.60415	0.806004	no	-0.120549	-0.377426	0.49715	0.72339	no
ENSG00000075568	-0.121823	-0.432284	0.45205	0.683835	no	0.0463301	0.194814	0.7302	0.884858	no
ENSG00000075618	-0.460081	-3.587	5e-05	0.000394466	yes	-0.3583	-2.94413	5e-05	0.000394466	yes
ENSG00000075624	0.113031	0.836163	0.14495	0.318347	no	0.269128	1.99447	0.00025	0.00169574	yes
ENSG00000075643	-0.644991	-2.2557	5e-05	0.000394466	yes	-1.11069	-3.29539	5e-05	0.000394466	yes
ENSG00000075711	0.0905414	0.445614	0.4226	0.655396	no	0.324202	1.61876	0.0037	0.0171896	yes
ENSG00000075785	0.183965	1.0543	0.06395	0.17213	no	-0.0468682	-0.256674	0.6527	0.838634	no
ENSG00000075790	0.552759	3.16272	5e-05	0.000394466	yes	0.181455	1.04522	0.06	0.163839	no
ENSG00000075856	-0.130232	-0.68255	0.22985	0.438082	no	0.102071	0.507055	0.367	0.59915	no
ENSG00000075914	0.0393887	0.202377	0.72485	0.882219	no	0.496005	2.57215	0.0001	0.000748217	yes
ENSG00000075975	0.183066	0.610631	0.29425	0.517775	no	0.135423	0.448892	0.4404	0.672939	no
ENSG00000076043	1.08301	7.09171	5e-05	0.000394466	yes	0.726152	4.69785	5e-05	0.000394466	yes
ENSG00000076108	0.0972676	0.316434	0.57775	0.785871	no	0.376663	1.24849	0.0313	0.0985496	no
ENSG00000076201	-0.455161	-0.815267	0.14755	0.32251	no	-0.502995	-1.05046	0.06545	0.175281	no
ENSG00000076242	-0.0792799	-0.386271	0.4788	0.707753	no	-0.161629	-0.826563	0.1394	0.309397	no
ENSG00000076321	0.375767	2.11766	0.00025	0.00169574	yes	0.445808	2.436	5e-05	0.000394466	yes
ENSG00000076513	-0.112641	-0.600975	0.29375	0.517026	no	-0.610209	-3.16469	5e-05	0.000394466	yes
ENSG00000076554	0.424922	1.97141	0.0005	0.00312122	yes	-0.210714	-0.950384	0.0963	0.235148	no
ENSG00000076604	0.289739	1.77817	0.00165	0.00869476	yes	0.213155	1.29056	0.0261	0.0850943	no
ENSG00000076641	-0.324602	-1.01608	0.0399	0.119441	no	-0.336716	-1.04241	0.03435	0.106078	no
ENSG00000076685	0.231453	1.14364	0.0336	0.104221	no	0.266294	1.32453	0.01505	0.0545744	no
ENSG00000076706	-0.108371	-0.177776	0.6525	0.838552	no	-0.0459196	-0.0843767	0.8276	0.930924	no
ENSG00000076826	-0.310927	-1.49519	0.0137	0.0505764	no	0.00831388	0.0357966	0.9462	0.97691	no
ENSG00000076864	-0.223759	-1.03587	0.06075	0.165511	no	0.133683	0.667339	0.2302	0.438523	no
ENSG00000076924	-0.0423472	-0.389295	0.4915	0.71832	no	0.0218755	0.197369	0.7298	0.884567	no
ENSG00000076984	0.00589388	0.0359401	0.9457	0.97674	no	0.029786	0.18293	0.7317	0.885649	no
ENSG00000077044	-0.0219138	-0.0738846	0.894	0.956815	no	0.168119	0.496382	0.3885	0.621715	no
ENSG00000077092	-0.21808	-0.824965	0.1323	0.297913	no	-0.885646	-2.95772	5e-05	0.000394466	yes
ENSG00000077097	-0.232218	-1.07236	0.0661	0.176595	no	0.117597	0.526762	0.34335	0.574338	no
ENSG00000077147	0.370703	1.78282	0.00215	0.0108713	yes	0.116229	0.562778	0.3191	0.546686	no
ENSG00000077150	0.0929089	0.567336	0.3159	0.54295	no	0.590317	3.43255	5e-05	0.000394466	yes
ENSG00000077157	-0.0254352	-0.0773621	0.88745	0.954751	no	-0.0560954	-0.197848	0.72405	0.881708	no
ENSG00000077232	-0.379016	-2.08666	5e-05	0.000394466	yes	-0.349332	-1.93197	0.00105	0.00591759	yes
ENSG00000077235	0.267232	1.3543	0.01345	0.0498462	yes	0.303522	1.60413	0.0037	0.0171896	yes
ENSG00000077254	0.949075	5.76445	5e-05	0.000394466	yes	1.11165	6.81295	5e-05	0.000394466	yes
ENSG00000077380	0.0934342	0.652263	0.254	0.468192	no	0.138526	0.927983	0.0979	0.238089	no
ENSG00000077549	0.140636	1.0084	0.0803	0.204886	no	0.254132	1.87568	0.00115	0.00640105	yes
ENSG00000077585	0.605535	2.28783	5e-05	0.000394466	yes	0.445865	2.18018	0.0003	0.00199267	yes
ENSG00000077684	-0.267075	-1.08195	0.0515	0.145477	no	-0.716231	-2.78151	5e-05	0.000394466	yes
ENSG00000077782	0.387503	1.73689	0.00175	0.0091262	yes	0.61211	2.4541	5e-05	0.000394466	yes
ENSG00000077984	0	0	1	1	no	0	0	1	1	no
ENSG00000078043	0.215784	1.14954	0.0395	0.118577	no	0.338398	1.82538	0.0011	0.00616363	yes
ENSG00000078061	0.118578	0.771088	0.17535	0.364378	no	0.0341669	0.222861	0.6912	0.862859	no
ENSG00000078070	-0.0849147	-0.612911	0.2336	0.442943	no	0.164939	1.19854	0.02025	0.0694603	no
ENSG00000078114	-0.14186	-0.706641	0.208	0.40937	no	-0.829076	-3.5348	5e-05	0.000394466	yes
ENSG00000078124	0.208652	0.89969	0.1187	0.275084	no	0.214279	0.975959	0.09275	0.228687	no
ENSG00000078140	0.143084	0.650594	0.2528	0.466756	no	0.346335	1.62	0.00505	0.0222042	yes
ENSG00000078177	-0.0364655	-0.1822	0.72265	0.881185	no	-0.0853361	-0.391246	0.47815	0.707151	no
ENSG00000078246	0.57149	0.72893	0.10845	0.257107	no	0.724425	0.889954	0.0411	0.122083	no
ENSG00000078304	0.188173	1.27697	0.01995	0.0686396	no	0.440874	3.06672	5e-05	0.000394466	yes
ENSG00000078369	0.181259	0.966422	0.08865	0.221068	no	0.126929	0.683153	0.2259	0.433057	no
ENSG00000078399	-0.758552	-0.519353	0.25815	0.473148	no	-0.810193	-0.596516	0.2031	0.402544	no
ENSG00000078403	0.250634	1.07924	0.04925	0.140447	no	0.526348	2.17652	0.0002	0.00139451	yes
ENSG00000078618	0.0231683	0.121518	0.82525	0.929884	no	-0.10384	-0.548229	0.3255	0.554188	no
ENSG00000078674	0.010449	0.0477239	0.9269	0.97081	no	-0.178373	-0.79119	0.1417	0.312959	no
ENSG00000078687	0.262448	0.42508	0.4373	0.670051	no	-0.0590466	-0.0881688	0.8688	0.947908	no
ENSG00000078699	0.317531	1.86325	0.00125	0.0068727	yes	-0.233946	-1.32404	0.021	0.0714839	no
ENSG00000078747	-0.00333342	-0.0160838	0.97385	0.986677	no	0.0840555	0.370108	0.4622	0.693169	no
ENSG00000078795	0.384871	0.168391	0.7844	0.911928	no	-0.46596	-0.17373	0.7048	0.871277	no
ENSG00000078808	0.264917	1.98367	0.00035	0.00228343	yes	0.199736	1.50453	0.00885	0.0354173	yes
ENSG00000078902	0.325083	2.17211	0.0001	0.000748217	yes	0.640163	3.49908	5e-05	0.000394466	yes
ENSG00000079134	-0.0608295	-0.243432	0.67025	0.849419	no	-0.0348065	-0.140348	0.8069	0.921869	no
ENSG00000079246	0.0699259	0.406652	0.46825	0.69876	no	0.115507	0.643138	0.2492	0.462468	no
ENSG00000079257	Inf	0	1	1	no	0	0	1	1	no
ENSG00000079277	0.215995	0.953449	0.09525	0.233345	no	0.217057	0.968346	0.0888	0.221372	no
ENSG00000079313	0.0791796	0.298896	0.5603	0.773476	no	0.531265	2.0142	0.00075	0.00442828	yes
ENSG00000079332	0.0595393	0.411865	0.45705	0.688578	no	0.280065	1.95964	0.0007	0.00417041	yes
ENSG00000079335	-0.689928	-3.10524	5e-05	0.000394466	yes	-0.902983	-5.25709	5e-05	0.000394466	yes
ENSG00000079387	-0.213328	-0.415315	0.3708	0.603344	no	0.206081	0.439157	0.36605	0.598216	no
ENSG00000079435	1.09935	0	1	1	no	1.06585	0	1	1	no
ENSG00000079459	0.372771	2.7878	5e-05	0.000394466	yes	0.413284	3.06974	5e-05	0.000394466	yes
ENSG00000079482	0.442232	0.387492	0.21575	0.419657	no	0.491027	0.465004	0.17565	0.36481	no
ENSG00000079691	0.315645	2.44136	5e-05	0.000394466	yes	-0.107641	-0.870488	0.12915	0.29276	no
ENSG00000079805	0.0614767	0.297307	0.6025	0.804617	no	0.211372	1.0527	0.0624	0.168861	no
ENSG00000079841	0.166081	1.32493	0.0215	0.0728501	no	-0.42266	-3.2311	5e-05	0.000394466	yes
ENSG00000080189	0.00946636	0.0744863	0.889	0.955176	no	-0.51211	-3.80957	5e-05	0.000394466	yes
ENSG00000080200	-0.262865	-1.0706	0.05015	0.142529	no	-0.0946773	-0.396998	0.4715	0.701606	no
ENSG00000080224	-0.923953	-6.49287	5e-05	0.000394466	yes	0.908599	6.53509	5e-05	0.000394466	yes
ENSG00000080298	-0.221631	-0.834384	0.12365	0.283378	no	0.299179	0.839364	0.12695	0.28898	no
ENSG00000080345	-0.212907	-1.19294	0.0101	0.039431	yes	0.0263557	0.151176	0.74385	0.892056	no
ENSG00000080371	0.0613434	0.313212	0.5815	0.788648	no	0.0942335	0.477021	0.41175	0.644598	no
ENSG00000080493	0.857273	6.69666	5e-05	0.000394466	yes	1.04874	8.25849	5e-05	0.000394466	yes
ENSG00000080503	0.00821513	0.0480242	0.9332	0.972719	no	-0.4007	-2.21684	5e-05	0.000394466	yes
ENSG00000080546	0.0552919	0.365498	0.52575	0.74651	no	1.03439	7.07149	5e-05	0.000394466	yes
ENSG00000080561	0.55555	2.78809	5e-05	0.000394466	yes	0.668917	3.40758	5e-05	0.000394466	yes
ENSG00000080603	0.125642	0.171428	0.7559	0.898331	no	0.0259988	0.0350525	0.95235	0.979164	no
ENSG00000080608	-0.320868	-1.91968	0.00055	0.00339017	yes	0.0490616	0.27991	0.6236	0.819494	no
ENSG00000080709	-0.271699	-1.39423	0.01485	0.0540224	no	-0.0607432	-0.341332	0.5491	0.764532	no
ENSG00000080802	0.02091	0.101837	0.8559	0.942392	no	0.0717414	0.391693	0.4759	0.705405	no
ENSG00000080815	0.174313	1.03905	0.06415	0.172526	no	-0.192315	-1.14076	0.0437	0.128136	no
ENSG00000080823	-0.288181	-0.190082	0.5111	0.73517	no	0.316506	0.210268	0.43985	0.672303	no
ENSG00000080839	-0.233177	-1.22401	0.0336	0.104221	no	-0.31853	-1.60624	0.00515	0.0225883	yes
ENSG00000080845	0.282357	0.454217	0.4063	0.639283	no	-0.0997087	-0.15152	0.7727	0.906378	no
ENSG00000080854	0.0242346	0.050467	0.91485	0.966064	no	0.497623	1.02048	0.0456	0.132563	no
ENSG00000081014	0.161838	1.1369	0.04785	0.137345	no	-0.0661219	-0.458679	0.41985	0.652941	no
ENSG00000081026	0.0963464	0.587217	0.3099	0.536316	no	0.331843	1.93541	0.00065	0.00390953	yes
ENSG00000081087	0.562201	2.12632	0.00025	0.00169574	yes	-0.101639	-0.35232	0.53975	0.757052	no
ENSG00000081177	-0.0307945	-0.225314	0.6839	0.858331	no	-0.109674	-0.786416	0.16295	0.346263	no
ENSG00000081320	-0.502237	-2.84593	5e-05	0.000394466	yes	-0.83878	-4.99222	5e-05	0.000394466	yes
ENSG00000081377	-0.37052	-1.51176	0.00595	0.0255172	yes	-0.0748415	-0.26873	0.59875	0.80191	no
ENSG00000081692	0.132076	0.650517	0.24605	0.458512	no	-0.0252208	-0.126469	0.8238	0.929406	no
ENSG00000081760	-0.51169	-3.7018	5e-05	0.000394466	yes	0.0383476	0.284089	0.60225	0.804438	no
ENSG00000081791	0.0718778	0.485034	0.39825	0.631171	no	-0.124934	-0.835011	0.1438	0.316437	no
ENSG00000081803	2.33977	18.843	5e-05	0.000394466	yes	1.0877	8.50717	5e-05	0.000394466	yes
ENSG00000081913	0.111871	0.314356	0.5831	0.789793	no	0.302767	0.82282	0.1456	0.319344	no
ENSG00000081923	0.42594	1.85041	0.0014	0.00756525	yes	0.244625	1.1264	0.04875	0.139308	no
ENSG00000082014	0.378412	1.84729	0.00185	0.00957288	yes	-0.16652	-0.754685	0.1863	0.379612	no
ENSG00000082068	-0.0176326	-0.097277	0.8635	0.945497	no	0.153828	0.843422	0.13355	0.299911	no
ENSG00000082196	1.12048	1.86051	0.003	0.0143914	yes	0.690981	1.07962	0.0722	0.189044	no
ENSG00000082212	0.0567723	0.383655	0.49605	0.722415	no	-0.331672	-2.13261	0.00025	0.00169574	yes
ENSG00000082258	0.11402	0.524442	0.3587	0.590912	no	0.137925	0.647188	0.2576	0.472641	no
ENSG00000082438	1.00888	4.63346	5e-05	0.000394466	yes	0.334638	1.42289	0.01215	0.0459257	yes
ENSG00000082458	-0.0353073	-0.186891	0.74235	0.891373	no	0.155012	0.836243	0.1474	0.322271	no
ENSG00000082515	-0.169346	-1.50313	0.00955	0.0377414	yes	0.120047	1.06615	0.0643	0.172837	no
ENSG00000082641	0.315938	1.32235	0.01985	0.0683507	no	0.271182	1.21396	0.03375	0.104599	no
ENSG00000082701	0.389951	1.83935	0.00155	0.00824944	yes	0.418891	2.00059	0.00085	0.00494128	yes
ENSG00000082781	-0.45241	-2.30548	5e-05	0.000394466	yes	-0.55613	-2.79061	5e-05	0.000394466	yes
ENSG00000082805	1.19315	3.1677	5e-05	0.000394466	yes	2.20748	6.26625	5e-05	0.000394466	yes
ENSG00000082898	-0.0218928	-0.110703	0.81445	0.925038	no	0.116963	0.591151	0.1879	0.381749	no
ENSG00000082996	0.079409	0.29388	0.60015	0.802814	no	0.329311	1.20868	0.0354	0.108654	no
ENSG00000083123	-0.3147	-1.86835	0.00085	0.00494128	yes	-0.578839	-3.41133	5e-05	0.000394466	yes
ENSG00000083168	0.15023	0.545379	0.3331	0.56287	no	0.28576	1.05411	0.06375	0.171733	no
ENSG00000083290	-0.417273	-1.6879	0.0021	0.0106535	yes	-0.603671	-2.75786	5e-05	0.000394466	yes
ENSG00000083307	0.079046	0.434353	0.35495	0.586427	no	0.276105	1.52792	0.00185	0.00957288	yes
ENSG00000083520	-0.0328243	-0.216285	0.70375	0.870792	no	-0.0349147	-0.224047	0.68915	0.861449	no
ENSG00000083544	-0.0258825	-0.159395	0.78105	0.910058	no	-0.266114	-1.63198	0.0048	0.0213063	yes
ENSG00000083635	-0.104695	-0.531109	0.35395	0.585368	no	0.317613	1.67577	0.00405	0.0185143	yes
ENSG00000083642	-0.0603396	-0.294121	0.6113	0.811213	no	-0.164847	-0.808808	0.15465	0.333592	no
ENSG00000083720	-2.10538	-11.9212	5e-05	0.000394466	yes	-3.80472	-21.4725	5e-05	0.000394466	yes
ENSG00000083750	-0.2177	-0.892357	0.1165	0.270984	no	-0.445133	-1.89127	0.00055	0.00339017	yes
ENSG00000083799	0.438105	2.18262	0.0001	0.000748217	yes	0.639449	3.15183	5e-05	0.000394466	yes
ENSG00000083807	0.111856	0.728154	0.19935	0.397673	no	0.386546	2.37381	0.0001	0.000748217	yes
ENSG00000083828	0.0121556	0.0307655	0.9509	0.978764	no	0.353158	0.920091	0.0831	0.21045	no
ENSG00000083844	0.200206	1.47447	0.00915	0.0364309	yes	0.303388	2.11406	0.0001	0.000748217	yes
ENSG00000083857	-0.175997	-0.795294	0.1117	0.262743	no	-0.126121	-0.572536	0.26175	0.477912	no
ENSG00000084070	0.0907434	0.551045	0.3336	0.563526	no	-0.00773584	-0.0518597	0.9285	0.971347	no
ENSG00000084073	0.545041	4.39268	5e-05	0.000394466	yes	0.273086	2.2079	5e-05	0.000394466	yes
ENSG00000084112	-0.0917209	-0.428215	0.4416	0.674177	no	0.310428	1.63803	0.0044	0.0198021	yes
ENSG00000084234	0.328253	2.53187	5e-05	0.000394466	yes	0.231218	1.78169	0.00095	0.00542971	yes
ENSG00000084444	0.742057	5.27863	5e-05	0.000394466	yes	-0.154037	-1.0655	0.0494	0.140795	no
ENSG00000084652	-0.266863	-2.24714	5e-05	0.000394466	yes	0.208456	1.75767	0.00215	0.0108713	yes
ENSG00000084676	0.200536	0.901514	0.1027	0.246932	no	0.341221	1.46039	0.0093	0.0369299	yes
ENSG00000084733	0.415916	2.36294	5e-05	0.000394466	yes	0.453655	2.56111	5e-05	0.000394466	yes
ENSG00000085063	0.278848	1.89221	0.00075	0.00442828	yes	0.242566	1.69003	0.0025	0.0123557	yes
ENSG00000085224	0.0966901	0.238627	0.63575	0.827763	no	0.176873	0.465176	0.36425	0.596577	no
ENSG00000085276	-0.0848831	-0.199054	0.6681	0.84813	no	-0.139506	-0.301276	0.52155	0.743156	no
ENSG00000085365	-0.118776	-0.779564	0.1646	0.348806	no	-0.458982	-2.94112	5e-05	0.000394466	yes
ENSG00000085377	0.48126	3.84756	5e-05	0.000394466	yes	-0.2109	-1.76029	0.00265	0.0129582	yes
ENSG00000085382	-0.097411	-0.627628	0.27275	0.491754	no	-0.49868	-2.1456	0.0005	0.00312122	yes
ENSG00000085415	-0.242329	-1.43565	0.0115	0.0439305	yes	-0.0681873	-0.411065	0.4714	0.701552	no
ENSG00000085449	0.196214	1.09992	0.0313	0.0985496	no	-0.0929983	-0.490354	0.3436	0.574704	no
ENSG00000085491	-0.14047	-1.10519	0.05405	0.151146	no	-0.128817	-1.01487	0.0777	0.19978	no
ENSG00000085511	-0.0182013	-0.035605	0.9483	0.977729	no	0.0425624	0.0854615	0.87375	0.950089	no
ENSG00000085552	-0.655963	-5.57344	5e-05	0.000394466	yes	-0.473192	-4.1061	5e-05	0.000394466	yes
ENSG00000085721	0.296651	1.42254	0.01125	0.043166	yes	0.283912	1.33063	0.01605	0.0574594	no
ENSG00000085733	0.00585231	0.0338999	0.9493	0.978123	no	0.238918	1.40832	0.011	0.0423859	yes
ENSG00000085788	-0.168234	-0.420134	0.46385	0.694796	no	-0.173381	-0.444556	0.42805	0.660666	no
ENSG00000085831	0.465484	3.37556	5e-05	0.000394466	yes	0.426907	3.06667	5e-05	0.000394466	yes
ENSG00000085832	-0.162282	-1.00083	0.0749	0.194376	no	-0.31658	-1.99808	0.00035	0.00228343	yes
ENSG00000085871	0.0999805	0.661711	0.2495	0.462731	no	-0.146346	-0.949699	0.0986	0.239444	no
ENSG00000085872	-0.000486571	-0.000722453	0.9992	0.999525	no	0.290518	0.468111	0.3211	0.549161	no
ENSG00000085982	-0.453963	-1.92755	0.0009	0.00518136	yes	-0.532963	-2.5093	5e-05	0.000394466	yes
ENSG00000085999	-0.795692	-1.57991	0.00245	0.0121508	yes	-0.524891	-1.18902	0.02675	0.0868912	no
ENSG00000086015	-0.128023	-0.580118	0.31445	0.541534	no	0.277312	1.2705	0.0298	0.0947044	no
ENSG00000086061	0.100042	0.800961	0.15945	0.34105	no	0.0983833	0.779513	0.1762	0.365637	no
ENSG00000086062	-0.0935133	-0.562694	0.31925	0.546909	no	-0.248901	-1.54092	0.0095	0.0376082	yes
ENSG00000086102	0.0579451	0.428566	0.4443	0.676732	no	0.0197052	0.147798	0.7899	0.914406	no
ENSG00000086200	-0.398118	-1.35652	0.0121	0.0457679	yes	-0.272294	-0.941799	0.06645	0.177257	no
ENSG00000086205	-0.118117	-0.716251	0.21285	0.415841	no	-0.58371	-3.58696	5e-05	0.000394466	yes
ENSG00000086300	0.175349	1.08808	0.05995	0.163727	no	-0.200037	-1.24954	0.02935	0.0935319	no
ENSG00000086506	-0.953176	-0.964345	0.10565	0.252023	no	-0.456456	-0.528763	0.357	0.58897	no
ENSG00000086570	0.975551	0	1	1	no	-0.742806	0	1	1	no
ENSG00000086598	0.152785	1.23641	0.0278	0.0895925	no	0.340935	2.7292	5e-05	0.000394466	yes
ENSG00000086619	0.318842	1.56441	0.007	0.029217	yes	-0.587846	-2.33575	0.0001	0.000748217	yes
ENSG00000086666	0.0487942	0.35177	0.5377	0.755593	no	0.00651837	0.0461926	0.9326	0.972712	no
ENSG00000086758	0.0830107	0.305877	0.5544	0.768877	no	0.232597	0.853384	0.10555	0.25186	no
ENSG00000086848	0.190898	0.888388	0.1142	0.267261	no	0.00589379	0.0256831	0.96665	0.98333	no
ENSG00000087008	0.252118	1.59979	0.00515	0.0225883	yes	0.377342	1.95592	0.0009	0.00518136	yes
ENSG00000087053	0.141025	0.922342	0.09375	0.230578	no	0.0548654	0.353492	0.51505	0.738168	no
ENSG00000087095	0.0506806	0.372933	0.50905	0.733288	no	0.445595	3.54804	5e-05	0.000394466	yes
ENSG00000087157	0.00887997	0.0609651	0.9187	0.967197	no	0.236944	1.67487	0.00355	0.0166083	yes
ENSG00000087206	-0.156568	-0.84091	0.1295	0.293313	no	0.147028	0.81144	0.1497	0.326064	no
ENSG00000087266	-0.213245	-0.954109	0.09035	0.224408	no	0.173764	0.819166	0.14425	0.317162	no
ENSG00000087269	-0.0923739	-0.727997	0.202	0.401153	no	0.0839276	0.66918	0.2492	0.462468	no
ENSG00000087274	0.240372	1.43164	0.0075	0.0308919	yes	0.308504	1.92804	0.0004	0.00256373	yes
ENSG00000087299	-0.0298019	-0.143021	0.80085	0.919357	no	-0.000836333	-0.00421843	0.9944	0.996397	no
ENSG00000087301	0.024836	0.128946	0.8149	0.925264	no	-0.237483	-1.28771	0.02265	0.0759889	no
ENSG00000087338	-0.00860916	-0.0673557	0.90395	0.961093	no	-0.0668771	-0.522377	0.3585	0.590636	no
ENSG00000087448	-0.0751894	-0.380821	0.5083	0.732779	no	-0.722347	-3.45928	5e-05	0.000394466	yes
ENSG00000087460	0.132132	1.03893	0.0646	0.173458	no	-0.0563907	-0.441494	0.43065	0.663275	no
ENSG00000087884	-0.00139196	-0.00426276	0.9943	0.996351	no	-0.0371069	-0.118994	0.83585	0.934397	no
ENSG00000087903	-0.337041	-1.08786	0.0287	0.0918888	no	0.290327	0.857987	0.0996	0.241375	no
ENSG00000088035	0.0741947	0.510745	0.3753	0.608004	no	-0.368021	-2.82965	5e-05	0.000394466	yes
ENSG00000088038	-0.0230891	-0.132064	0.8162	0.925981	no	0.304543	1.71873	0.0025	0.0123557	yes
ENSG00000088053	-0.422995	0	1	1	no	-2.28723	0	1	1	no
ENSG00000088179	-0.00447335	-0.015696	0.9792	0.988874	no	0.150504	0.537865	0.3457	0.576962	no
ENSG00000088247	-0.00648957	-0.0420245	0.94365	0.975896	no	0.332133	2.17368	0.0002	0.00139451	yes
ENSG00000088256	-0.0870052	-0.466627	0.3807	0.613719	no	-0.0831733	-0.402404	0.4408	0.673402	no
ENSG00000088298	-0.0469217	-0.139478	0.80655	0.921755	no	-0.112079	-0.340145	0.5514	0.766348	no
ENSG00000088325	-0.475847	-3.95911	5e-05	0.000394466	yes	0.0287868	0.241489	0.6717	0.849992	no
ENSG00000088387	-0.161279	-0.477834	0.3991	0.632157	no	-0.607566	-1.93261	0.0007	0.00417041	yes
ENSG00000088448	-0.368469	-2.0725	0.00035	0.00228343	yes	-0.278304	-1.52449	0.0089	0.0355916	yes
ENSG00000088682	-0.335878	-1.6123	0.00495	0.0218443	yes	-0.0224828	-0.115012	0.83695	0.934909	no
ENSG00000088727	0.0110745	0.0333688	0.9498	0.97831	no	0.339439	1.02629	0.0773	0.199038	no
ENSG00000088766	-0.0605063	-0.427646	0.4564	0.687935	no	0.217229	1.53853	0.0073	0.0302255	yes
ENSG00000088808	0.306821	1.09173	0.0516	0.145715	no	0.89714	3.25414	5e-05	0.000394466	yes
ENSG00000088812	0.296262	2.23387	5e-05	0.000394466	yes	0.103875	0.781055	0.171	0.357985	no
ENSG00000088832	0.599945	4.11777	5e-05	0.000394466	yes	0.616524	4.24563	5e-05	0.000394466	yes
ENSG00000088854	0.336407	2.0248	0.00045	0.00285055	yes	0.0521867	0.32398	0.5675	0.778179	no
ENSG00000088876	-0.206591	-0.465242	0.4051	0.638011	no	0.0529525	0.110831	0.8446	0.938288	no
ENSG00000088888	0.154111	1.116	0.05265	0.148091	no	0.237917	1.62333	0.0043	0.0194374	yes
ENSG00000088930	0.0457912	0.390605	0.50365	0.728693	no	-0.135168	-1.15744	0.0435	0.127692	no
ENSG00000088992	0.0340171	0.249743	0.66165	0.843947	no	0.0767796	0.580681	0.3039	0.529223	no
ENSG00000089006	0.0643138	0.309354	0.589	0.794268	no	0.281272	1.36958	0.0179	0.0627639	no
ENSG00000089009	-0.0394464	-0.306225	0.58985	0.794862	no	0.183768	1.42774	0.01345	0.0498462	yes
ENSG00000089053	-0.0726115	-0.49924	0.36715	0.599253	no	-0.035864	-0.236114	0.67185	0.850027	no
ENSG00000089057	-0.207473	-1.24236	0.02995	0.0950339	no	0.0281841	0.158609	0.7794	0.909284	no
ENSG00000089063	-0.0226129	-0.180685	0.75195	0.896271	no	-0.288963	-2.28777	5e-05	0.000394466	yes
ENSG00000089094	-0.14463	-0.605245	0.2423	0.453845	no	0.247636	1.0806	0.039	0.11742	no
ENSG00000089123	-0.081264	-0.445496	0.4367	0.669595	no	0.557616	3.51829	5e-05	0.000394466	yes
ENSG00000089154	-0.00607955	-0.0173217	0.96365	0.982634	no	0.373688	1.05697	0.01495	0.0543077	no
ENSG00000089159	0.337478	1.62651	0.0043	0.0194374	yes	0.535401	2.57364	5e-05	0.000394466	yes
ENSG00000089177	0.407827	2.2512	0.00025	0.00169574	yes	-0.0529313	-0.399337	0.4812	0.709861	no
ENSG00000089248	0.0661223	0.535197	0.335	0.564926	no	-0.0162833	-0.131455	0.81675	0.926339	no
ENSG00000089250	-4.82891	0	1	1	no	-3.45761	0	1	1	no
ENSG00000089280	-0.0685948	-0.392792	0.4941	0.720694	no	0.218464	1.27586	0.0256	0.0837402	no
ENSG00000089335	-0.21655	-1.30991	0.0214	0.0725734	no	-0.259822	-1.57675	0.0059	0.0253499	yes
ENSG00000089351	-0.0927587	-0.654577	0.24335	0.455273	no	0.0019836	0.0137031	0.9809	0.989746	no
ENSG00000089486	-0.32187	-2.5396	5e-05	0.000394466	yes	-0.673834	-5.28434	5e-05	0.000394466	yes
ENSG00000089597	-0.0188443	-0.130228	0.81235	0.924301	no	0.0583702	0.397099	0.45045	0.682533	no
ENSG00000089682	-0.117549	-0.794554	0.1566	0.33654	no	-0.111236	-0.864	0.1246	0.284918	no
ENSG00000089693	0.154417	0.915119	0.10345	0.248154	no	-0.0440344	-0.255827	0.64745	0.835455	no
ENSG00000089737	0.24187	1.62854	0.00475	0.0211284	yes	-0.0356289	-0.234386	0.6832	0.858055	no
ENSG00000089775	0.105548	0.198717	0.70135	0.869065	no	-0.206683	-0.385086	0.4629	0.693805	no
ENSG00000089818	0.559391	4.22723	5e-05	0.000394466	yes	0.376411	2.7871	5e-05	0.000394466	yes
ENSG00000089847	0.41511	1.52664	0.0033	0.0156062	yes	-0.592246	-1.3539	0.0156	0.0561935	no
ENSG00000089876	-0.0731166	-0.314659	0.5883	0.79373	no	-0.185693	-0.75837	0.18345	0.375615	no
ENSG00000089902	-0.0678475	-0.387157	0.4369	0.669716	no	-0.12889	-0.631133	0.2116	0.414305	no
ENSG00000089916	-0.218045	-0.903425	0.11085	0.261287	no	0.0454193	0.19463	0.72925	0.884307	no
ENSG00000090020	0.60248	2.12219	0.0003	0.00199267	yes	0.320282	1.16477	0.0407	0.121148	no
ENSG00000090054	-0.4413	-3.17975	5e-05	0.000394466	yes	-0.458447	-3.38552	5e-05	0.000394466	yes
ENSG00000090060	-0.0387903	-0.210233	0.70625	0.872045	no	0.0486565	0.262902	0.63685	0.828436	no
ENSG00000090061	-0.121907	-0.182723	0.74395	0.892056	no	-0.0551424	-0.0801016	0.883	0.952851	no
ENSG00000090316	-0.000861042	-0.00662318	0.99045	0.993986	no	0.383266	2.97124	5e-05	0.000394466	yes
ENSG00000090372	-0.0291701	-0.0949091	0.8637	0.945566	no	-0.245484	-0.845546	0.12225	0.281042	no
ENSG00000090447	-0.448525	-2.33777	5e-05	0.000394466	yes	-0.281684	-1.58304	0.0062	0.0263992	yes
ENSG00000090487	0.0765087	0.577855	0.3107	0.537147	no	0.0124188	0.0925432	0.87375	0.950089	no
ENSG00000090565	-0.0373217	-0.240522	0.6689	0.848698	no	0.0446854	0.267406	0.62975	0.823708	no
ENSG00000090581	0.370274	1.78069	0.00195	0.0100062	yes	0.214134	1.0018	0.0775	0.199414	no
ENSG00000090615	0.475987	1.33999	0.00425	0.0192412	yes	0.651025	1.84328	0.0007	0.00417041	yes
ENSG00000090621	-0.237589	-1.33452	0.0139	0.0511987	no	0.527926	3.03646	5e-05	0.000394466	yes
ENSG00000090686	0.10727	0.595844	0.27765	0.497882	no	0.102766	0.532644	0.3389	0.569267	no
ENSG00000090857	0.221331	1.11071	0.044	0.128866	no	0.398709	2.23336	5e-05	0.000394466	yes
ENSG00000090861	-0.0177068	-0.140061	0.79555	0.917152	no	-0.509592	-3.97737	5e-05	0.000394466	yes
ENSG00000090863	0.304701	1.87744	0.00085	0.00494128	yes	0.156996	1.01402	0.05805	0.159743	no
ENSG00000090905	0.364683	1.25573	0.00895	0.0357555	yes	0.431322	1.4164	0.01165	0.0443902	yes
ENSG00000090975	0.300838	1.03169	0.05595	0.155128	no	0.1962	0.729471	0.16855	0.354397	no
ENSG00000091039	-0.266546	-1.5609	0.00175	0.0091262	yes	0.176266	1.03317	0.03725	0.11316	no
ENSG00000091073	0.167483	0.648188	0.19985	0.398355	no	0.494593	1.94973	5e-05	0.000394466	yes
ENSG00000091106	1.27656	0	1	1	no	-0.582336	0	1	1	no
ENSG00000091127	-0.520804	-2.1104	0.00015	0.00108114	yes	-0.232793	-0.921776	0.10455	0.250023	no
ENSG00000091140	0.106054	0.778043	0.1646	0.348806	no	-0.493841	-3.53452	5e-05	0.000394466	yes
ENSG00000091157	0.164641	0.440786	0.4197	0.652837	no	-0.0725277	-0.192678	0.73065	0.885132	no
ENSG00000091164	0.0636736	0.367529	0.51965	0.741842	no	0.137704	0.813228	0.15105	0.32805	no
ENSG00000091409	-0.272174	-1.10888	0.018	0.0630467	no	-0.682391	-2.79044	5e-05	0.000394466	yes
ENSG00000091436	-0.821689	-5.57097	5e-05	0.000394466	yes	-0.426131	-2.94026	5e-05	0.000394466	yes
ENSG00000091490	0.0754308	0.366565	0.51045	0.73454	no	-0.107071	-0.553353	0.3195	0.547185	no
ENSG00000091527	-0.0770428	-0.513559	0.34895	0.5802	no	0.0818681	0.542427	0.3272	0.556107	no
ENSG00000091542	0.0138656	0.117159	0.8345	0.933773	no	0.163201	1.37698	0.01575	0.056616	no
ENSG00000091622	0.502666	1.07988	0.03725	0.11316	no	-0.357677	-0.62763	0.17375	0.361977	no
ENSG00000091879	0.532214	0.985023	0.0861	0.216218	no	1.46167	2.87657	5e-05	0.000394466	yes
ENSG00000092108	0.378868	2.57756	5e-05	0.000394466	yes	0.338463	2.17722	0.00015	0.00108114	yes
ENSG00000092140	-0.303264	-2.02389	0.0002	0.00139451	yes	0.0423646	0.279081	0.6199	0.817329	no
ENSG00000092148	0.237236	1.21712	0.00915	0.0364309	yes	0.122839	0.645443	0.1703	0.356911	no
ENSG00000092199	0.0391499	0.30617	0.59755	0.801136	no	0.267232	2.08313	0.00025	0.00169574	yes
ENSG00000092201	-0.0501022	-0.348048	0.52745	0.747831	no	-0.359052	-2.5261	5e-05	0.000394466	yes
ENSG00000092377	-0.314802	-1.72201	0.0027	0.0131678	yes	-0.459809	-2.42027	5e-05	0.000394466	yes
ENSG00000092421	-0.313574	-1.06106	0.07155	0.187759	no	-0.494168	-1.70899	0.00775	0.0317375	yes
ENSG00000092439	-0.00327592	-0.020881	0.96905	0.984497	no	0.0759528	0.482379	0.35655	0.588386	no
ENSG00000092529	1.16588	0.468855	0.0571	0.157638	no	-0.114673	-0.0402675	0.86805	0.9475	no
ENSG00000092621	-0.356553	-3.0091	5e-05	0.000394466	yes	-1.02618	-8.60249	5e-05	0.000394466	yes
ENSG00000092871	-0.115335	-0.268503	0.6378	0.829165	no	-0.444376	-1.03765	0.07545	0.195465	no
ENSG00000092978	-0.183081	-0.852857	0.1317	0.296912	no	0.107988	0.463053	0.4119	0.644797	no
ENSG00000093000	-0.0775149	-0.406804	0.45505	0.68661	no	0.18867	0.97848	0.0766	0.197649	no
ENSG00000093183	-0.0716743	-0.24853	0.6509	0.837487	no	-0.0565402	-0.193254	0.7234	0.881401	no
ENSG00000093217	0.0622736	0.268202	0.64485	0.833764	no	0.391187	1.50566	0.00965	0.0380578	yes
ENSG00000094631	-0.367439	-1.72778	0.00225	0.0113068	yes	-0.529772	-2.40263	5e-05	0.000394466	yes
ENSG00000094841	-0.0311445	-0.253144	0.6514	0.8378	no	0.0140206	0.118475	0.83325	0.93328	no
ENSG00000094880	-0.000858869	-0.00326485	0.9953	0.996884	no	0.0230457	0.088193	0.87415	0.950207	no
ENSG00000094916	-0.16354	-0.357361	0.50635	0.730996	no	-0.0278103	-0.058881	0.9111	0.964218	no
ENSG00000094975	0.273644	1.65084	0.003	0.0143914	yes	-0.00389464	-0.0218209	0.969	0.984465	no
ENSG00000095015	0.302023	2.55972	5e-05	0.000394466	yes	0.015397	0.139616	0.8071	0.922003	no
ENSG00000095059	0.226671	0.912616	0.11805	0.273899	no	-0.445562	-1.59214	0.007	0.029217	yes
ENSG00000095203	-0.322191	-2.66743	5e-05	0.000394466	yes	0.481966	4.02838	5e-05	0.000394466	yes
ENSG00000095209	-0.236226	-1.23872	0.0299	0.0949187	no	-2.06703	-10.7955	5e-05	0.000394466	yes
ENSG00000095564	-0.204605	-1.38713	0.01485	0.0540224	no	-0.0340558	-0.228548	0.68315	0.858051	no
ENSG00000095574	-0.095407	-0.248444	0.62385	0.819494	no	-0.219331	-0.616377	0.24155	0.452915	no
ENSG00000095585	0.220781	0.486894	0.3592	0.591296	no	-0.376679	-0.768186	0.1517	0.3291	no
ENSG00000095587	-0.16457	-0.505866	0.36395	0.596227	no	0.238956	0.747871	0.1862	0.379478	no
ENSG00000095739	0.564986	4.75943	5e-05	0.000394466	yes	0.693117	5.85881	5e-05	0.000394466	yes
ENSG00000095794	0.111691	0.666565	0.2269	0.434448	no	0.0428236	0.253167	0.6483	0.835987	no
ENSG00000095906	-0.0292122	-0.144251	0.80545	0.92122	no	-0.135202	-0.702911	0.22455	0.431365	no
ENSG00000095932	0	0	1	1	no	0	0	1	1	no
ENSG00000095951	0.417552	1.40099	0.01305	0.0486372	yes	0.374531	1.32675	0.0189	0.0656509	no
ENSG00000096060	-0.308033	-2.34109	0.0001	0.000748217	yes	0.351736	2.708	5e-05	0.000394466	yes
ENSG00000096063	-0.0568627	-0.310931	0.57805	0.786163	no	0.199086	1.0578	0.05815	0.15997	no
ENSG00000096070	-0.12798	-0.352887	0.51695	0.739685	no	-0.111004	-0.29694	0.58395	0.79048	no
ENSG00000096080	0.136942	1.30193	0.0233	0.0776849	no	0.262311	2.50015	5e-05	0.000394466	yes
ENSG00000096384	0.168605	1.44185	0.01015	0.0395871	yes	0.557379	4.76282	5e-05	0.000394466	yes
ENSG00000096401	0.00403813	0.0333384	0.95475	0.979747	no	-0.0125348	-0.103455	0.8555	0.942307	no
ENSG00000096433	0.0335542	0.179843	0.75595	0.898332	no	-0.289673	-1.5489	0.00735	0.0303984	yes
ENSG00000096746	-0.0747147	-0.348455	0.54655	0.762323	no	-0.0437826	-0.203998	0.72255	0.88116	no
ENSG00000096872	0.238162	1.23835	0.0245	0.0808728	no	0.212588	1.10874	0.04895	0.139757	no
ENSG00000096968	0.166428	1.02141	0.0752	0.195009	no	-0.187636	-1.06665	0.0605	0.164936	no
ENSG00000096996	0	0	1	1	no	Inf	0	1	1	no
ENSG00000097007	-0.0578622	-0.253792	0.6512	0.837723	no	0.276018	1.24595	0.0276	0.0890879	no
ENSG00000097046	-0.43448	-2.89398	5e-05	0.000394466	yes	0.0283611	0.190978	0.74075	0.890685	no
ENSG00000099204	-0.417064	-2.08872	5e-05	0.000394466	yes	-0.184732	-0.935298	0.0886	0.220973	no
ENSG00000099219	-0.0997538	-0.598169	0.29585	0.519666	no	0.0182655	0.104761	0.84915	0.939892	no
ENSG00000099250	0.567191	2.63735	5e-05	0.000394466	yes	0.163709	0.76459	0.1708	0.357715	no
ENSG00000099251	-0.100152	-0.651743	0.24785	0.460797	no	-0.135772	-0.865648	0.1288	0.29217	no
ENSG00000099282	0.0758526	0.54973	0.3368	0.566926	no	0.274776	2.02232	0.0003	0.00199267	yes
ENSG00000099377	-0.0534502	-0.476662	0.40315	0.635862	no	-0.332526	-2.99911	5e-05	0.000394466	yes
ENSG00000099399	0	0	1	1	no	0	0	1	1	no
ENSG00000099622	-0.0287044	-0.227385	0.69075	0.862589	no	-0.0627184	-0.496941	0.37995	0.61292	no
ENSG00000099625	0.18913	0.220274	0.7173	0.878335	no	0.316748	0.376109	0.5318	0.751076	no
ENSG00000099725	-0.277794	-1.06823	0.06095	0.165967	no	0.093779	0.371055	0.51205	0.735906	no
ENSG00000099783	-1.62962	-11.6654	5e-05	0.000394466	yes	-2.27455	-15.707	5e-05	0.000394466	yes
ENSG00000099797	0.177619	0.976223	0.0834	0.210988	no	-0.0535402	-0.29474	0.59915	0.802154	no
ENSG00000099810	-0.507806	-2.63853	5e-05	0.000394466	yes	-0.510599	-2.62077	5e-05	0.000394466	yes
ENSG00000099814	-0.313044	-2.22268	0.00015	0.00108114	yes	0.246275	1.80634	0.00245	0.0121508	yes
ENSG00000099821	-0.0514815	-0.307302	0.5859	0.791726	no	0.111951	0.548573	0.32815	0.557038	no
ENSG00000099840	0.600751	1.05186	0.04435	0.129658	no	0.563495	0.902942	0.08045	0.205174	no
ENSG00000099875	0.235659	1.36195	0.0167	0.0593605	no	0.514266	2.98451	5e-05	0.000394466	yes
ENSG00000099889	0.0589986	0.173987	0.7469	0.893676	no	0.137531	0.422853	0.423	0.655686	no
ENSG00000099899	0.116265	0.314081	0.5773	0.785529	no	-0.132696	-0.343344	0.5453	0.761481	no
ENSG00000099901	-0.333715	-2.06541	0.0003	0.00199267	yes	0.101573	0.658383	0.24925	0.462499	no
ENSG00000099904	-0.128639	-0.656227	0.24425	0.45631	no	-0.332866	-1.6252	0.00555	0.0240664	yes
ENSG00000099910	0.0917382	0.533894	0.34295	0.573929	no	0.0939333	0.553035	0.3242	0.552824	no
ENSG00000099917	0.661492	3.17106	5e-05	0.000394466	yes	0.979275	4.57407	5e-05	0.000394466	yes
ENSG00000099937	-0.556729	0	1	1	no	1.63154	0.587986	0.24935	0.462576	no
ENSG00000099942	-0.11962	-1.00257	0.07955	0.203403	no	0.357862	3.01271	5e-05	0.000394466	yes
ENSG00000099949	0.0980534	0.426689	0.46175	0.692794	no	0.129541	0.606055	0.2893	0.512156	no
ENSG00000099954	0.191147	0.626281	0.25225	0.466238	no	0.395457	1.69242	0.0028	0.0135814	yes
ENSG00000099956	-0.0733746	-0.578434	0.30945	0.535789	no	-0.0244765	-0.192863	0.7341	0.886966	no
ENSG00000099958	-0.512747	-0.580091	0.24295	0.454709	no	-0.427544	-0.459341	0.35515	0.586687	no
ENSG00000099991	0.145348	0.676086	0.2232	0.429531	no	0.412895	1.95583	0.00095	0.00542971	yes
ENSG00000100003	-0.100812	-0.197051	0.71395	0.876656	no	-0.179692	-0.346189	0.52095	0.742703	no
ENSG00000100014	0.480973	3.44447	5e-05	0.000394466	yes	0.527547	3.76484	5e-05	0.000394466	yes
ENSG00000100023	0.0683848	0.361103	0.5244	0.745357	no	0.173622	0.89866	0.11205	0.263365	no
ENSG00000100027	-0.178567	-0.279276	0.62495	0.820219	no	-0.909374	-1.36512	0.0184	0.0642	no
ENSG00000100030	0.0355649	0.152417	0.786	0.912811	no	-0.0040104	-0.0172308	0.97395	0.986717	no
ENSG00000100038	-0.0926229	-0.50535	0.3635	0.595631	no	0.269508	1.67157	0.0034	0.0160162	yes
ENSG00000100058	-0.618922	-3.79551	5e-05	0.000394466	yes	-0.664716	-4.20494	5e-05	0.000394466	yes
ENSG00000100068	-0.0287071	-0.160512	0.7781	0.908858	no	0.186976	1.17385	0.03735	0.113414	no
ENSG00000100084	0.00283748	0.00982598	0.9875	0.992482	no	0.403246	1.4717	0.00435	0.0196218	yes
ENSG00000100092	-0.224883	-0.788549	0.12585	0.287006	no	0.0158894	0.0547529	0.915	0.966093	no
ENSG00000100099	-0.345026	-1.916	0.0008	0.00468454	yes	0.00970669	0.0546227	0.92165	0.968535	no
ENSG00000100105	0.102458	0.599773	0.29635	0.520165	no	-0.133404	-0.782849	0.177	0.366802	no
ENSG00000100106	-1.25037	-5.30071	5e-05	0.000394466	yes	-0.337826	-1.66857	0.0029	0.0139832	yes
ENSG00000100129	0.0192996	0.110711	0.8427	0.937531	no	0.313724	1.80278	0.002	0.0102249	yes
ENSG00000100138	-0.00161527	-0.00948575	0.987	0.992267	no	0.13156	0.786264	0.17435	0.362927	no
ENSG00000100139	-0.00876043	-0.0513627	0.9264	0.97069	no	0.00905633	0.0492647	0.92855	0.971363	no
ENSG00000100151	0.0311181	0.193314	0.7372	0.888539	no	0.013156	0.0807526	0.89165	0.95624	no
ENSG00000100154	0.194731	0.271238	0.60715	0.808215	no	0.231815	0.285049	0.60855	0.809126	no
ENSG00000100162	-0.664765	-5.77967	5e-05	0.000394466	yes	-0.688649	-5.93035	5e-05	0.000394466	yes
ENSG00000100197	0.290623	0.14541	0.81775	0.926866	no	0.690546	0.352369	0.59195	0.796423	no
ENSG00000100201	0.0604029	0.421704	0.4218	0.654779	no	0.0924922	0.655716	0.21745	0.421926	no
ENSG00000100206	0.42914	0	1	1	no	0.129748	0	1	1	no
ENSG00000100207	-0.042736	-0.26595	0.6371	0.828606	no	0.208065	1.30902	0.0217	0.0733975	no
ENSG00000100211	-0.356235	-2.83006	5e-05	0.000394466	yes	0.228774	1.67858	0.0039	0.0179486	yes
ENSG00000100219	-0.156444	-1.30586	0.02235	0.0751783	no	0.0936974	0.774161	0.17575	0.364949	no
ENSG00000100225	0.236153	1.82522	0.00135	0.00733226	yes	-0.0108877	-0.0834112	0.8807	0.952466	no
ENSG00000100226	0.267712	0.613651	0.22465	0.431482	no	0.213764	0.494087	0.3377	0.567888	no
ENSG00000100227	-0.063151	-0.444913	0.42925	0.661781	no	-0.195101	-1.36908	0.0165	0.0587741	no
ENSG00000100239	0.064021	0.253723	0.64295	0.832577	no	0.206065	0.7977	0.1418	0.313105	no
ENSG00000100241	-0.191501	-0.918341	0.0744	0.193305	no	0.149058	0.732388	0.149	0.324885	no
ENSG00000100242	-0.00813648	-0.0401813	0.9424	0.97535	no	-0.206386	-1.0074	0.08315	0.210528	no
ENSG00000100263	0.0871696	0.206494	0.71885	0.879203	no	-0.0145691	-0.0332897	0.95335	0.979362	no
ENSG00000100266	-0.105595	-0.565657	0.2926	0.515921	no	-0.316576	-1.69918	0.00245	0.0121508	yes
ENSG00000100280	0.501245	3.859	5e-05	0.000394466	yes	0.373093	2.89948	5e-05	0.000394466	yes
ENSG00000100281	-0.114293	-0.652354	0.25535	0.469865	no	-0.039282	-0.221311	0.7016	0.869239	no
ENSG00000100290	0.528798	4.50449	5e-05	0.000394466	yes	0.533337	4.54338	5e-05	0.000394466	yes
ENSG00000100294	-0.0320768	-0.260034	0.65135	0.8378	no	0.449407	3.34525	5e-05	0.000394466	yes
ENSG00000100296	0.0879987	0.315897	0.565	0.77623	no	0.0672426	0.254429	0.646	0.834537	no
ENSG00000100304	0.0099896	0.0788143	0.89065	0.955923	no	0.0410704	0.327715	0.5621	0.774513	no
ENSG00000100312	0.221465	0	1	1	no	-0.872324	0	1	1	no
ENSG00000100320	0.027994	0.164008	0.7748	0.907244	no	0.224304	1.2576	0.02835	0.0910577	no
ENSG00000100321	0.342485	2.22201	0.0001	0.000748217	yes	0.217684	1.28706	0.0238	0.0790521	no
ENSG00000100324	0.0715738	0.448978	0.42335	0.656008	no	-0.0236691	-0.159157	0.77925	0.909224	no
ENSG00000100330	-0.141099	-0.591949	0.28655	0.50885	no	-0.341392	-1.39099	0.0176	0.0619316	no
ENSG00000100345	0.215553	1.21562	0.00265	0.0129582	yes	0.409944	2.29966	5e-05	0.000394466	yes
ENSG00000100347	-0.0288735	-0.181269	0.74375	0.892056	no	-0.0233978	-0.150018	0.7913	0.914976	no
ENSG00000100348	0.00724342	0.0511451	0.92835	0.9713	no	0.12522	0.892484	0.11805	0.273899	no
ENSG00000100354	0.330987	0.977637	0.0781	0.20051	no	0.205931	0.592197	0.29145	0.514499	no
ENSG00000100359	0.0232297	0.0812804	0.88465	0.953421	no	-0.0977215	-0.332027	0.5495	0.76482	no
ENSG00000100364	0.064287	0.351112	0.53	0.749815	no	0.122268	0.674818	0.23315	0.442377	no
ENSG00000100372	0.162481	1.22262	0.032	0.100252	no	-0.0133246	-0.0991417	0.86325	0.945447	no
ENSG00000100376	-0.0312301	-0.20139	0.72695	0.883302	no	0.0416786	0.269409	0.6417	0.831659	no
ENSG00000100380	0.0981918	0.550888	0.3353	0.565312	no	0.0783461	0.451745	0.433	0.665894	no
ENSG00000100387	0.115486	0.631273	0.2769	0.497036	no	0.0348711	0.185214	0.7452	0.892799	no
ENSG00000100393	-0.0380352	-0.302029	0.6019	0.804145	no	0.156791	1.25156	0.0286	0.0916746	no
ENSG00000100401	-0.212579	-1.54473	0.00645	0.0273313	yes	0.199387	1.50443	0.00915	0.0364309	yes
ENSG00000100403	0.0471405	0.389549	0.49325	0.719909	no	0.0837527	0.696039	0.22515	0.432038	no
ENSG00000100412	-0.461941	-2.61868	5e-05	0.000394466	yes	-0.80353	-4.26503	5e-05	0.000394466	yes
ENSG00000100413	-0.0403321	-0.172809	0.7556	0.89823	no	0.0726891	0.325539	0.56295	0.774913	no
ENSG00000100416	0.0143961	0.102911	0.8595	0.943935	no	0.402219	2.93233	5e-05	0.000394466	yes
ENSG00000100425	0.179021	0.777576	0.1723	0.359999	no	0.471074	2.14296	0.0003	0.00199267	yes
ENSG00000100426	-0.787971	-6.47135	5e-05	0.000394466	yes	-0.363753	-3.01044	5e-05	0.000394466	yes
ENSG00000100429	0.231987	0.575932	0.33865	0.569037	no	0.167537	0.404497	0.49595	0.722346	no
ENSG00000100478	0.159145	0.251962	0.66015	0.843024	no	0.484637	0.857007	0.13085	0.295537	no
ENSG00000100483	-0.290194	-1.91181	0.0006	0.00365163	yes	-0.310105	-2.0874	0.0001	0.000748217	yes
ENSG00000100485	0.078384	0.519747	0.34915	0.580446	no	-0.188565	-1.23831	0.02875	0.0920223	no
ENSG00000100503	-0.0682197	-0.322584	0.5498	0.764988	no	0.135907	0.671093	0.2034	0.402908	no
ENSG00000100522	-0.182117	-0.907811	0.0534	0.149767	no	-0.0155619	-0.0774297	0.8672	0.94702	no
ENSG00000100523	-0.227484	-1.06563	0.0618	0.167745	no	-0.464156	-2.25427	5e-05	0.000394466	yes
ENSG00000100526	-0.322901	-3.00625	5e-05	0.000394466	yes	-0.219085	-2.07415	0.00025	0.00169574	yes
ENSG00000100528	0.0977987	0.755584	0.18915	0.38329	no	-0.114469	-0.887868	0.12485	0.285325	no
ENSG00000100554	0.39893	1.32585	0.0188	0.0653897	no	0.452357	1.49406	0.0085	0.0343066	yes
ENSG00000100567	-0.0250773	-0.155464	0.78715	0.913189	no	0.269559	1.69397	0.0035	0.016423	yes
ENSG00000100568	0.0738992	0.158345	0.77635	0.908078	no	-0.118541	-0.263144	0.64665	0.834987	no
ENSG00000100578	-0.308937	-1.11565	0.05265	0.148091	no	0.0496635	0.183545	0.7425	0.891454	no
ENSG00000100580	-0.603258	-4.47777	5e-05	0.000394466	yes	0.0308541	0.232336	0.683	0.857979	no
ENSG00000100592	0.176559	0.544217	0.32475	0.553336	no	0.0250496	0.0920091	0.86425	0.945925	no
ENSG00000100596	-0.0157915	-0.0618811	0.9101	0.963823	no	0.415144	1.65424	0.00475	0.0211284	yes
ENSG00000100600	0.613179	4.80163	5e-05	0.000394466	yes	0.407064	3.1457	5e-05	0.000394466	yes
ENSG00000100604	2.164	0	1	1	no	0.606795	0	1	1	no
ENSG00000100612	0.321341	2.10564	5e-05	0.000394466	yes	0.0633842	0.404998	0.4749	0.704621	no
ENSG00000100614	-0.247438	-1.54797	0.00825	0.0334634	yes	0.265877	1.67893	0.00415	0.0188795	yes
ENSG00000100625	-0.297732	-1.83365	0.00155	0.00824944	yes	-0.080231	-0.495057	0.3912	0.624429	no
ENSG00000100629	-0.549526	-2.41582	0.0001	0.000748217	yes	-0.148117	-0.76957	0.15965	0.341267	no
ENSG00000100632	0.00437129	0.0237016	0.96365	0.982635	no	0.023336	0.129359	0.8157	0.925679	no
ENSG00000100644	0.0169036	0.0845952	0.8839	0.953189	no	0.295942	1.49255	0.0087	0.0349407	yes
ENSG00000100647	-0.0128657	-0.0596438	0.9159	0.966527	no	-0.256483	-1.31791	0.02145	0.0727073	no
ENSG00000100650	0.332114	2.1626	0.0002	0.00139451	yes	0.110843	0.740705	0.19795	0.395764	no
ENSG00000100664	-0.147547	-0.756345	0.18905	0.383143	no	0.164884	0.855198	0.13705	0.305565	no
ENSG00000100697	0.460989	1.70372	0.0029	0.0139832	yes	0.729828	2.70103	5e-05	0.000394466	yes
ENSG00000100711	-0.216614	-1.64762	0.00485	0.0214903	yes	0.0474974	0.366241	0.5189	0.74123	no
ENSG00000100714	-0.364601	-1.71731	0.0011	0.00616363	yes	-0.0562475	-0.27894	0.5989	0.802014	no
ENSG00000100722	0.0577753	0.357475	0.52205	0.743596	no	-0.236996	-1.4857	0.0073	0.0302255	yes
ENSG00000100726	-0.21892	-0.869328	0.12745	0.289927	no	0.020015	0.0762046	0.90235	0.960427	no
ENSG00000100731	0.0850323	0.318725	0.54635	0.76216	no	0.17379	0.608262	0.2465	0.459135	no
ENSG00000100749	-0.413357	-2.9386	5e-05	0.000394466	yes	0.207902	1.34167	0.01395	0.0513317	no
ENSG00000100764	0.210162	1.48038	0.0109	0.0420474	yes	0.253885	1.80995	0.0017	0.00891245	yes
ENSG00000100784	0.0527463	0.312327	0.56485	0.776178	no	-0.315784	-1.80202	0.00145	0.00779664	yes
ENSG00000100796	-0.0677261	-0.447609	0.43645	0.66936	no	0.258886	1.7359	0.0033	0.0156062	yes
ENSG00000100811	0.121146	0.591786	0.2943	0.51783	no	0.189121	0.941754	0.099	0.240205	no
ENSG00000100813	0.0969781	0.401245	0.48015	0.709067	no	0.0938169	0.396402	0.4882	0.715745	no
ENSG00000100814	-0.701906	-4.39789	5e-05	0.000394466	yes	-0.462312	-2.91753	5e-05	0.000394466	yes
ENSG00000100836	-0.214726	-1.00157	0.07805	0.200419	no	-0.105857	-0.512561	0.36715	0.599253	no
ENSG00000100852	0.586108	4.48169	5e-05	0.000394466	yes	1.20659	8.87976	5e-05	0.000394466	yes
ENSG00000100890	-0.0721025	-0.239528	0.6484	0.836038	no	-0.0438061	-0.147183	0.78585	0.912694	no
ENSG00000100897	0.140967	0.634921	0.2526	0.466574	no	-0.203833	-0.962607	0.08245	0.209167	no
ENSG00000100902	0.0873577	0.523062	0.3644	0.596717	no	0.0606487	0.372084	0.5181	0.740661	no
ENSG00000100916	0.198665	1.07969	0.0568	0.157013	no	0.179297	1.028	0.0727	0.190029	no
ENSG00000100938	-0.81369	-1.96651	0.00035	0.00228343	yes	-1.18054	-2.59851	5e-05	0.000394466	yes
ENSG00000100991	0.166501	1.39787	0.0154	0.0556431	no	0.0647911	0.547595	0.3451	0.57636	no
ENSG00000100994	0.282318	1.95021	0.0008	0.00468454	yes	-0.120253	-0.782086	0.168	0.353616	no
ENSG00000100997	0.220976	0.835913	0.1302	0.294429	no	0.496187	2.04483	0.00025	0.00169574	yes
ENSG00000101019	-0.592428	-2.73274	5e-05	0.000394466	yes	-0.367566	-1.61905	0.00285	0.0137829	yes
ENSG00000101040	0.0421593	0.219318	0.63215	0.825346	no	0.226414	1.27754	0.0085	0.0343066	yes
ENSG00000101049	0.896454	1.04589	0.0091	0.0362684	yes	2.03262	2.65146	5e-05	0.000394466	yes
ENSG00000101052	-0.110261	-0.889778	0.11365	0.266255	no	0.0891869	0.684379	0.22465	0.431482	no
ENSG00000101057	-1.00444	-8.88249	5e-05	0.000394466	yes	-0.47809	-3.86852	5e-05	0.000394466	yes
ENSG00000101096	-0.820168	0	1	1	no	-2.05354	0	1	1	no
ENSG00000101104	-0.332951	-1.00322	0.07525	0.195111	no	-0.308442	-0.947439	0.0901	0.223968	no
ENSG00000101109	0.0283085	0.15347	0.78235	0.910941	no	0.22844	1.3026	0.01985	0.0683507	no
ENSG00000101126	0.0898542	0.42279	0.4485	0.680584	no	0.188226	0.867931	0.13215	0.297624	no
ENSG00000101150	0.222723	1.7704	0.0019	0.00979865	yes	0.107952	0.867438	0.13035	0.294708	no
ENSG00000101152	0.182729	1.11891	0.0503	0.142823	no	0.0110798	0.0673629	0.9045	0.961237	no
ENSG00000101158	0.0371328	0.266122	0.6362	0.828038	no	0.285606	2.09487	0.00025	0.00169574	yes
ENSG00000101160	0.398749	3.26644	5e-05	0.000394466	yes	0.181928	1.48307	0.01025	0.0399069	yes
ENSG00000101161	0.405362	2.90996	5e-05	0.000394466	yes	0.0632543	0.441549	0.4408	0.673402	no
ENSG00000101166	0.00428575	0.0283723	0.9616	0.982027	no	0.257264	1.72344	0.0024	0.0119296	yes
ENSG00000101181	-0.102387	-0.599209	0.2973	0.521402	no	0.425959	2.55267	5e-05	0.000394466	yes
ENSG00000101182	0.0611139	0.515533	0.368	0.600181	no	0.0574762	0.485062	0.3942	0.627572	no
ENSG00000101187	0.0905223	0.499201	0.37615	0.608954	no	0.618691	4.07354	5e-05	0.000394466	yes
ENSG00000101190	0.0852486	0.727859	0.20335	0.402838	no	0.408028	3.17426	5e-05	0.000394466	yes
ENSG00000101191	0.123893	0.820747	0.1537	0.332125	no	0.273182	1.82916	0.00185	0.00957288	yes
ENSG00000101193	0.0343596	0.250784	0.6543	0.839405	no	0.282001	2.09079	0.0003	0.00199267	yes
ENSG00000101199	-0.0150728	-0.0968408	0.86615	0.946639	no	0.190963	1.2664	0.0263	0.0856505	no
ENSG00000101210	0.0775495	0.658997	0.25555	0.470063	no	0.135574	1.15111	0.04465	0.13028	no
ENSG00000101216	-0.0605851	-0.605525	0.2924	0.515634	no	0.197362	1.74528	0.0037	0.0171896	yes
ENSG00000101236	0.103014	0.567222	0.318	0.545358	no	0.294971	1.71958	0.0023	0.0115225	yes
ENSG00000101247	-0.586365	-4.07062	5e-05	0.000394466	yes	-0.156852	-1.11932	0.05435	0.151778	no
ENSG00000101265	-0.511841	-4.89773	5e-05	0.000394466	yes	-0.284098	-2.74489	5e-05	0.000394466	yes
ENSG00000101266	-0.0602979	-0.405643	0.4696	0.700058	no	0.126806	0.84046	0.1335	0.299823	no
ENSG00000101290	0.229438	1.14346	0.047	0.135467	no	0.805099	4.1123	5e-05	0.000394466	yes
ENSG00000101310	0.269904	1.91239	0.00055	0.00339017	yes	0.186393	1.31303	0.0196	0.0676202	no
ENSG00000101331	0.15516	0.31338	0.5661	0.777125	no	-0.187401	-0.343549	0.53005	0.749847	no
ENSG00000101333	-0.226518	-0.975608	0.08585	0.215698	no	-0.685861	-3.01485	5e-05	0.000394466	yes
ENSG00000101337	-0.788716	-5.06931	5e-05	0.000394466	yes	-0.971762	-5.75177	5e-05	0.000394466	yes
ENSG00000101350	0.171151	1.41883	0.01225	0.0462091	yes	0.258141	2.11268	0.00015	0.00108114	yes
ENSG00000101353	-0.274124	-0.0459752	0.77325	0.906616	no	-0.684408	-0.108103	0.4617	0.692738	no
ENSG00000101363	-0.736634	-6.70138	5e-05	0.000394466	yes	-1.34672	-11.3032	5e-05	0.000394466	yes
ENSG00000101367	0.283673	2.37214	5e-05	0.000394466	yes	0.684934	5.74738	5e-05	0.000394466	yes
ENSG00000101384	0.926015	7.8231	5e-05	0.000394466	yes	-0.0124818	-0.104884	0.85365	0.941656	no
ENSG00000101391	-0.0875272	-0.60693	0.2884	0.511037	no	0.0556568	0.384191	0.4983	0.724162	no
ENSG00000101407	-0.166212	-1.5732	0.0057	0.0246243	yes	0.0995124	0.893975	0.1197	0.276695	no
ENSG00000101413	0.145153	0.692097	0.2169	0.421302	no	0.239791	1.02512	0.0721	0.188871	no
ENSG00000101421	0.156882	1.26675	0.02545	0.0833677	no	0.153018	1.23551	0.03035	0.0960884	no
ENSG00000101440	#NAME?	0	1	1	no	1.19268	0	1	1	no
ENSG00000101444	-0.136443	-1.12258	0.04435	0.129658	no	-0.043371	-0.357595	0.52495	0.745948	no
ENSG00000101452	-0.349052	-2.43992	5e-05	0.000394466	yes	0.0753498	0.600518	0.29175	0.514848	no
ENSG00000101460	0.27556	1.92636	0.00065	0.00390953	yes	0.0385519	0.270196	0.6387	0.829634	no
ENSG00000101474	-0.0660132	-0.555869	0.3319	0.561494	no	-0.276007	-2.32208	0.0001	0.000748217	yes
ENSG00000101493	-0.722508	-0.765904	0.09595	0.234438	no	-0.403615	-0.384125	0.3988	0.63179	no
ENSG00000101544	-0.0507226	-0.32786	0.5502	0.765256	no	0.217702	1.3304	0.01645	0.0586488	no
ENSG00000101546	-0.173565	-1.59446	0.00565	0.0244483	yes	0.0227052	0.208031	0.71515	0.877138	no
ENSG00000101557	-0.0171845	-0.0894493	0.8735	0.949948	no	0.19836	1.03126	0.06025	0.164384	no
ENSG00000101558	0.252681	1.68491	0.0028	0.0135814	yes	0.186638	1.2241	0.03045	0.0963499	no
ENSG00000101577	0.161168	0.861304	0.125	0.285562	no	-0.00221266	-0.0117576	0.9837	0.990838	no
ENSG00000101596	-0.213086	-0.886968	0.1072	0.254973	no	-0.300206	-1.26377	0.02045	0.0699773	no
ENSG00000101638	3.47354	0	1	1	no	4.67478	0	1	1	no
ENSG00000101639	0.450482	2.6854	5e-05	0.000394466	yes	0.815604	5.11291	5e-05	0.000394466	yes
ENSG00000101654	0.0898073	0.375832	0.5079	0.732393	no	0.247856	1.02628	0.0685	0.181527	no
ENSG00000101665	0.358217	1.60366	0.00655	0.0276809	yes	0.13532	0.581971	0.28975	0.512576	no
ENSG00000101745	0.582273	1.11816	0.0283	0.0909393	no	0.975584	1.95686	0.00015	0.00108114	yes
ENSG00000101752	0.0113459	0.0653782	0.9082	0.963171	no	0.265289	1.55051	0.00585	0.0251702	yes
ENSG00000101846	0.189286	1.38662	0.01625	0.0580254	no	-0.116576	-0.836111	0.1473	0.322116	no
ENSG00000101849	-0.353415	-1.66768	0.00355	0.0166083	yes	-0.112344	-0.50792	0.3756	0.60833	no
ENSG00000101868	-0.427367	-2.49876	5e-05	0.000394466	yes	0.0936023	0.5692	0.30605	0.53173	no
ENSG00000101901	0.150044	1.02178	0.07085	0.186266	no	0.087995	0.595597	0.29265	0.515927	no
ENSG00000101911	-0.277938	-2.13878	0.0002	0.00139451	yes	-0.248166	-1.97717	0.0004	0.00256373	yes
ENSG00000101945	-0.452873	-3.1437	5e-05	0.000394466	yes	0.00539829	0.0411591	0.9388	0.974191	no
ENSG00000101966	0.0893781	0.339026	0.54275	0.759356	no	-0.3313	-1.30915	0.021	0.0714839	no
ENSG00000101972	0.00286454	0.0152061	0.9724	0.986038	no	-0.120948	-0.638238	0.1951	0.391721	no
ENSG00000101986	0.248083	1.57888	0.00605	0.0258719	yes	-0.080308	-0.490324	0.39025	0.623416	no
ENSG00000102032	0.805675	0.95524	0.00795	0.0324295	yes	0.189555	0.201482	0.5694	0.779818	no
ENSG00000102096	0.0268045	0.218992	0.70995	0.874167	no	0.372455	3.17314	5e-05	0.000394466	yes
ENSG00000102098	-1.00392	-7.15295	5e-05	0.000394466	yes	-0.450217	-3.11462	5e-05	0.000394466	yes
ENSG00000102144	0.459766	3.4069	5e-05	0.000394466	yes	0.204584	1.51877	0.0078	0.0318998	yes
ENSG00000102172	-0.0206751	-0.173367	0.76375	0.902085	no	0.124182	1.04273	0.06935	0.183227	no
ENSG00000102181	-0.384189	-1.96041	0.00135	0.00733226	yes	-0.735797	-3.43185	5e-05	0.000394466	yes
ENSG00000102189	0.261138	1.26337	0.02635	0.0857932	no	0.538713	2.51145	5e-05	0.000394466	yes
ENSG00000102221	-0.0301838	-0.1999	0.7249	0.882219	no	0.0676225	0.38947	0.4971	0.723355	no
ENSG00000102287	-0.520423	-1.38349	0.00745	0.0307179	yes	0.140098	0.336531	0.516	0.738936	no
ENSG00000102312	0.156736	0.876224	0.11485	0.268352	no	-0.0203084	-0.0807194	0.8767	0.951275	no
ENSG00000102317	-0.0697989	-0.496225	0.37725	0.60995	no	-0.230754	-1.63334	0.00415	0.0188795	yes
ENSG00000102362	0.177682	0.439273	0.43135	0.664002	no	-0.407512	-0.950852	0.0855	0.215092	no
ENSG00000102471	0.338216	2.41478	5e-05	0.000394466	yes	0.0777548	0.552146	0.33245	0.562184	no
ENSG00000102531	0.255465	1.92729	0.00085	0.00494128	yes	-0.290877	-2.08482	0.0003	0.00199267	yes
ENSG00000102539	#NAME?	0	1	1	no	#NAME?	0	1	1	no
ENSG00000102543	-0.00234596	-0.0102171	0.9857	0.991753	no	0.00810987	0.0371019	0.94885	0.978002	no
ENSG00000102547	0.772696	4.28386	5e-05	0.000394466	yes	0.490818	2.73402	5e-05	0.000394466	yes
ENSG00000102572	-0.444899	-2.59596	5e-05	0.000394466	yes	-0.247385	-1.46789	0.0097	0.0381979	yes
ENSG00000102580	0.215046	1.74779	0.00285	0.0137829	yes	0.416507	3.37241	5e-05	0.000394466	yes
ENSG00000102595	-0.436351	-2.00277	0.0007	0.00417041	yes	-0.299659	-1.32302	0.02115	0.0719061	no
ENSG00000102606	0.275538	1.29933	0.0253	0.0829745	no	0.48878	2.3581	0.0001	0.000748217	yes
ENSG00000102699	-0.123753	-0.852613	0.123	0.28232	no	-0.404768	-2.77096	5e-05	0.000394466	yes
ENSG00000102710	-0.369224	-1.29193	0.02285	0.0764931	no	0.115631	0.401152	0.4887	0.716137	no
ENSG00000102743	-0.388696	-3.48152	5e-05	0.000394466	yes	-0.372838	-3.32797	5e-05	0.000394466	yes
ENSG00000102753	0.201325	1.90821	0.0009	0.00518136	yes	0.424451	3.72495	5e-05	0.000394466	yes
ENSG00000102755	1.45041	0	1	1	no	1.0366	0	1	1	no
ENSG00000102763	-0.251047	-1.58776	0.0046	0.0205619	yes	-0.141407	-0.866303	0.1123	0.263796	no
ENSG00000102780	0.305889	1.75845	0.0024	0.0119296	yes	0.321819	1.93415	0.00065	0.00390953	yes
ENSG00000102781	0.174971	0.892473	0.1153	0.268994	no	-0.13718	-0.695041	0.21945	0.424587	no
ENSG00000102786	0.0690553	0.402771	0.4652	0.696084	no	0.298057	1.7624	0.0016	0.00848051	yes
ENSG00000102804	0.341573	2.66266	5e-05	0.000394466	yes	0.468622	3.68495	5e-05	0.000394466	yes
ENSG00000102858	0.151614	0.693786	0.2261	0.433336	no	0.232777	1.1749	0.0387	0.116688	no
ENSG00000102893	-0.179306	-0.749762	0.1768	0.366552	no	-0.0898266	-0.373805	0.5028	0.728034	no
ENSG00000102897	0	0	1	1	no	0	0	1	1	no
ENSG00000102900	-0.349465	-1.99601	0.0004	0.00256373	yes	-0.359562	-1.99363	0.00045	0.00285055	yes
ENSG00000102901	0.0166031	0.0460098	0.9283	0.971285	no	0.171791	0.462944	0.37515	0.607904	no
ENSG00000102908	0.127568	0.598734	0.30275	0.527868	no	0.098321	0.44591	0.4368	0.669655	no
ENSG00000102921	0.186618	0.879087	0.12555	0.286476	no	0.446554	2.14841	0.0005	0.00312122	yes
ENSG00000102931	0.0857603	0.685451	0.23195	0.440825	no	-0.00668957	-0.0532558	0.92475	0.969971	no
ENSG00000102934	0.112735	0.859665	0.13135	0.296352	no	0.0642194	0.487205	0.38415	0.61725	no
ENSG00000102967	-0.219895	-1.74598	0.00195	0.0100062	yes	-0.123335	-0.983726	0.0867	0.21735	no
ENSG00000102974	-0.11231	-0.912181	0.1106	0.260787	no	-0.1017	-0.825653	0.1488	0.324589	no
ENSG00000102978	0.330701	1.2759	0.02325	0.0775369	no	0.275926	1.02044	0.06885	0.182315	no
ENSG00000103018	-0.131103	-0.84745	0.13515	0.3024	no	0.0843338	0.546699	0.33845	0.568822	no
ENSG00000103023	0.182125	0	1	1	no	1.2326	0	1	1	no
ENSG00000103035	0.124719	0.903964	0.11525	0.268912	no	-0.104758	-0.779725	0.17545	0.364518	no
ENSG00000103043	-0.235193	-1.62721	0.00335	0.0158116	yes	-0.0574045	-0.397029	0.4792	0.708099	no
ENSG00000103047	-0.23926	-1.0169	0.0781	0.20051	no	-0.221847	-0.789469	0.16445	0.348555	no
ENSG00000103064	0.0635699	0.192533	0.7317	0.885649	no	0.448438	1.33612	0.01795	0.0629153	no
ENSG00000103067	0.00504535	0.0180937	0.97115	0.985492	no	0.0852643	0.304384	0.57115	0.781076	no
ENSG00000103091	-0.0925276	-0.325551	0.5574	0.771261	no	0.320358	1.04061	0.0659	0.176188	no
ENSG00000103121	-0.0833494	-0.350935	0.5457	0.761713	no	-0.230999	-0.971266	0.0895	0.222797	no
ENSG00000103126	-0.277324	-1.95957	0.0004	0.00256373	yes	0.195453	1.41522	0.01415	0.0519158	no
ENSG00000103148	-0.126489	-0.335076	0.5624	0.774638	no	0.0666332	0.179104	0.7502	0.895264	no
ENSG00000103150	-0.115961	-0.888888	0.11785	0.273492	no	0.221233	1.75088	0.0027	0.0131678	yes
ENSG00000103152	0.0483414	0.325074	0.57165	0.781547	no	-0.186121	-1.24276	0.0312	0.0983186	no
ENSG00000103168	-0.157477	-0.679545	0.2261	0.433336	no	0.000870612	0.0035156	0.9956	0.99704	no
ENSG00000103194	0.0975114	0.634013	0.2524	0.46636	no	0.0782842	0.511699	0.35025	0.581576	no
ENSG00000103196	-0.367884	-1.68419	0.0047	0.0209396	yes	-1.16382	-5.67359	5e-05	0.000394466	yes
ENSG00000103197	0.167374	0.586437	0.257	0.471993	no	-0.194723	-0.645392	0.2165	0.420776	no
ENSG00000103222	0.0679807	0.381126	0.49825	0.724162	no	0.290095	1.65049	0.00325	0.0154039	yes
ENSG00000103227	0.127971	0.561954	0.3196	0.547305	no	-0.249062	-1.15976	0.04055	0.120806	no
ENSG00000103248	-0.0940088	-0.526588	0.35285	0.584247	no	-0.192901	-1.05042	0.06405	0.172349	no
ENSG00000103249	0.0690871	0.337797	0.5547	0.76912	no	-0.354417	-1.90183	0.0011	0.00616363	yes
ENSG00000103253	-0.218327	-0.779782	0.17145	0.358737	no	-0.6919	-2.40134	5e-05	0.000394466	yes
ENSG00000103260	0.0585341	0.416161	0.4651	0.695991	no	-0.162868	-1.11114	0.05565	0.154497	no
ENSG00000103264	-0.187549	-0.553371	0.3147	0.54183	no	0.189821	0.659712	0.2305	0.438883	no
ENSG00000103275	-0.120939	-0.841532	0.14235	0.314094	no	0.049879	0.323455	0.5652	0.776428	no
ENSG00000103326	-0.300534	-2.04301	0.0004	0.00256373	yes	0.614283	3.66259	5e-05	0.000394466	yes
ENSG00000103335	0.326976	1.39585	0.01265	0.0474465	yes	0.280972	1.20749	0.03015	0.0955699	no
ENSG00000103342	0.0301049	0.188278	0.7479	0.894177	no	0.209703	1.28544	0.0245	0.0808728	no
ENSG00000103353	0.212533	0.817379	0.16015	0.342059	no	0.288128	1.09393	0.0602	0.164288	no
ENSG00000103363	0.348006	1.70421	0.003	0.0143914	yes	0.0935033	0.458084	0.4225	0.655374	no
ENSG00000103365	-0.0404118	-0.165455	0.76685	0.903454	no	0.323459	1.38595	0.01505	0.0545744	no
ENSG00000103404	0.0706098	0.257471	0.654	0.839195	no	0.462584	1.72354	0.00205	0.010441	yes
ENSG00000103415	0.229917	1.11194	0.05375	0.15049	no	0.255118	1.27616	0.02865	0.0917977	no
ENSG00000103460	-0.270178	-1.03028	0.0722	0.189044	no	0.524398	2.19378	0.00015	0.00108114	yes
ENSG00000103479	0.291019	1.47021	0.0093	0.0369299	yes	0.00456793	0.023334	0.9661	0.983214	no
ENSG00000103495	-0.221943	-1.43732	0.012	0.0454611	yes	-0.150768	-0.966291	0.092	0.227486	no
ENSG00000103510	0.0371216	0.33806	0.55635	0.770405	no	0.137651	1.28047	0.02595	0.0847149	no
ENSG00000103544	-0.00498735	-0.0190415	0.97255	0.9861	no	-0.232169	-0.844778	0.10455	0.250023	no
ENSG00000103549	0.560212	2.36386	5e-05	0.000394466	yes	0.681997	2.83383	5e-05	0.000394466	yes
ENSG00000103591	-0.0731659	-0.417964	0.4639	0.694834	no	0.416573	2.52597	5e-05	0.000394466	yes
ENSG00000103657	0.334373	0.925134	0.09255	0.228418	no	0.221877	0.616223	0.2627	0.479046	no
ENSG00000103852	-0.0870887	-0.433895	0.4488	0.680871	no	-0.0386563	-0.200839	0.72955	0.884419	no
ENSG00000103855	0.0956424	0.646118	0.2473	0.460269	no	0.309983	2.09274	5e-05	0.000394466	yes
ENSG00000103876	-0.25323	-1.78922	0.00145	0.00779664	yes	-0.395538	-2.92092	5e-05	0.000394466	yes
ENSG00000103942	-0.637575	-2.39604	5e-05	0.000394466	yes	0.0736585	0.301642	0.59525	0.799348	no
ENSG00000103978	0.545109	3.36895	5e-05	0.000394466	yes	0.0946703	0.588648	0.3039	0.529223	no
ENSG00000104047	-0.202127	-1.64475	0.0027	0.0131678	yes	-0.0856657	-0.688396	0.2301	0.438407	no
ENSG00000104067	0.209815	1.17956	0.02245	0.0754093	no	0.190915	1.04569	0.0411	0.122083	no
ENSG00000104081	0.150218	0.747618	0.1833	0.375377	no	-0.0755892	-0.45388	0.4257	0.658324	no
ENSG00000104093	0.0838249	0.293297	0.59155	0.796126	no	0.0270083	0.0942788	0.8617	0.944815	no
ENSG00000104131	0.233846	1.03148	0.068	0.180487	no	0.321048	1.45747	0.0105	0.0407371	yes
ENSG00000104133	-0.0839994	-0.273616	0.50515	0.730043	no	-0.466339	-1.42042	0.0008	0.00468454	yes
ENSG00000104164	0.0114506	0.0621277	0.91085	0.964174	no	0.116073	0.630729	0.25585	0.470474	no
ENSG00000104205	-0.0814324	-0.469541	0.4067	0.639658	no	-0.189874	-0.933986	0.1028	0.247087	no
ENSG00000104218	-0.053623	-0.0796846	0.8644	0.946024	no	0.333832	0.535156	0.2815	0.502427	no
ENSG00000104228	-0.106895	-0.451313	0.43055	0.663194	no	0.147687	0.61184	0.28335	0.504818	no
ENSG00000104231	-0.243852	-1.55457	0.00665	0.0280372	yes	-0.769745	-4.86398	5e-05	0.000394466	yes
ENSG00000104331	-0.303606	-1.35335	0.02035	0.0697213	no	-0.476633	-2.14567	0.00015	0.00108114	yes
ENSG00000104343	0.270706	1.35877	0.0149	0.0541652	no	0.252482	1.33768	0.01675	0.0595115	no
ENSG00000104365	-0.0897472	-0.404691	0.4769	0.706281	no	0.110495	0.479076	0.3944	0.627692	no
ENSG00000104375	0.422488	2.31376	0.00015	0.00108114	yes	0.386675	2.10248	0.00035	0.00228343	yes
ENSG00000104388	0.138537	0.741935	0.1931	0.38879	no	-0.121918	-0.638306	0.2667	0.483982	no
ENSG00000104408	-0.0555448	-0.46181	0.42415	0.656844	no	-0.0351293	-0.29256	0.6076	0.808581	no
ENSG00000104412	0.00288981	0.0224188	0.9691	0.98453	no	-0.216184	-1.6437	0.0041	0.0186935	yes
ENSG00000104413	-0.228819	-0.999226	0.08305	0.210362	no	-0.410293	-1.75162	0.00195	0.0100062	yes
ENSG00000104419	0.992002	5.6271	5e-05	0.000394466	yes	0.260598	1.4297	0.00935	0.0371045	yes
ENSG00000104442	0.0444563	0.3376	0.5454	0.761506	no	0.111933	0.850912	0.13305	0.299103	no
ENSG00000104447	0.0389468	0.216206	0.68325	0.858099	no	0.132928	0.759106	0.1481	0.323393	no
ENSG00000104472	0.00944277	0.0462448	0.93415	0.972774	no	0.344954	1.6702	0.00415	0.0188795	yes
ENSG00000104490	1.79646	0.874177	5e-05	0.000394466	yes	1.65142	0.808975	5e-05	0.000394466	yes
ENSG00000104497	-0.154909	-0.883132	0.1199	0.276973	no	-0.222525	-1.55806	0.00625	0.0265855	yes
ENSG00000104517	0.158201	0.665089	0.19545	0.392267	no	0.208553	0.964957	0.04815	0.137956	no
ENSG00000104524	-0.131473	-0.921503	0.10535	0.25147	no	-0.310001	-2.25658	5e-05	0.000394466	yes
ENSG00000104529	-0.0314834	-0.229386	0.68885	0.861206	no	0.306456	2.23638	5e-05	0.000394466	yes
ENSG00000104549	0.212393	1.67119	0.0029	0.0139832	yes	0.538888	4.19823	5e-05	0.000394466	yes
ENSG00000104611	-0.164315	-0.968318	0.09145	0.226409	no	-0.261964	-1.57579	0.00675	0.0283811	yes
ENSG00000104635	-0.70127	-4.7584	5e-05	0.000394466	yes	0.383278	2.65021	5e-05	0.000394466	yes
ENSG00000104643	-0.027314	-0.172002	0.7625	0.901474	no	-0.0429404	-0.268202	0.641	0.831102	no
ENSG00000104671	0.12854	0.826849	0.14875	0.324506	no	0.0485649	0.321574	0.57235	0.781983	no
ENSG00000104679	0.148714	1.10767	0.054	0.151037	no	0.197601	1.4655	0.00945	0.037437	yes
ENSG00000104687	-0.00659551	-0.0542649	0.92115	0.96832	no	0.177577	1.45068	0.0113	0.0433009	yes
ENSG00000104689	0.107267	0.644768	0.2499	0.463209	no	0.412856	2.16955	0.0004	0.00256373	yes
ENSG00000104695	0.12854	0.807327	0.15625	0.336036	no	0.204921	1.29566	0.02305	0.0770415	no
ENSG00000104714	-0.588792	-3.31006	5e-05	0.000394466	yes	-0.598243	-3.29635	5e-05	0.000394466	yes
ENSG00000104723	-0.0830605	-0.567862	0.32805	0.557022	no	-0.134903	-0.923243	0.10565	0.252023	no
ENSG00000104728	-0.918397	-6.16333	5e-05	0.000394466	yes	-1.36756	-7.77336	5e-05	0.000394466	yes
ENSG00000104731	-0.0480804	-0.305926	0.58	0.787558	no	0.0478357	0.301672	0.58935	0.794469	no
ENSG00000104765	0.472583	3.09925	5e-05	0.000394466	yes	0.200784	1.28612	0.0249	0.0818905	no
ENSG00000104823	0.29044	1.16694	0.03565	0.10927	no	-0.0971831	-0.373577	0.50155	0.726775	no
ENSG00000104824	-0.0316867	-0.185779	0.7481	0.894281	no	-0.0284003	-0.166903	0.7744	0.90712	no
ENSG00000104852	-0.0548601	-0.414947	0.47135	0.701496	no	0.167675	1.2764	0.0235	0.0782434	no
ENSG00000104853	0.131188	0.350605	0.5109	0.734959	no	0.0972623	0.257669	0.6259	0.821018	no
ENSG00000104859	0.133836	0.69751	0.21865	0.423542	no	0.242275	1.24413	0.02855	0.0915355	no
ENSG00000104866	-0.143135	-0.473544	0.35185	0.583166	no	0.0864023	0.280288	0.6033	0.805374	no
ENSG00000104880	-0.138838	-0.886556	0.12055	0.278091	no	0.164288	0.970813	0.087	0.217886	no
ENSG00000104883	0.142468	0.663834	0.2465	0.459135	no	-0.784846	-3.37248	5e-05	0.000394466	yes
ENSG00000104884	-0.146001	-0.83232	0.1416	0.312826	no	0.0207848	0.105859	0.84775	0.939432	no
ENSG00000104885	-0.366554	-0.424009	0.46515	0.696047	no	0.557455	0.665102	0.25165	0.465533	no
ENSG00000104886	-0.103085	-0.324871	0.5705	0.780583	no	0.10616	0.340148	0.54545	0.761549	no
ENSG00000104899	-0.213287	-0.686794	0.1944	0.390641	no	-0.0993045	-0.462167	0.4094	0.642317	no
ENSG00000104903	0	0	1	1	no	0	0	1	1	no
ENSG00000104969	-0.123232	-0.974083	0.0857	0.215438	no	0.316351	2.49267	5e-05	0.000394466	yes
ENSG00000104973	-0.072027	-0.180231	0.74845	0.894442	no	0.238106	0.611568	0.2779	0.498169	no
ENSG00000104983	0.00641909	0.0187672	0.97115	0.985492	no	0.132015	0.317225	0.5557	0.769986	no
ENSG00000105063	0.229931	1.55724	0.0067	0.0282137	yes	0.649461	4.4425	5e-05	0.000394466	yes
ENSG00000105085	0.292485	0.391635	0.39225	0.625511	no	0.378229	0.546225	0.2265	0.433922	no
ENSG00000105127	0.0606948	0.247927	0.6664	0.84706	no	0.0630243	0.233847	0.682	0.857131	no
ENSG00000105131	-0.977602	0	1	1	no	-0.540937	0	1	1	no
ENSG00000105135	-0.0295424	-0.19281	0.73105	0.885346	no	-0.397357	-2.74911	5e-05	0.000394466	yes
ENSG00000105176	0.0162194	0.12787	0.82555	0.929921	no	0.0520731	0.41153	0.46825	0.69876	no
ENSG00000105185	-0.138621	-1.08348	0.0565	0.156316	no	-0.017212	-0.133689	0.81335	0.92468	no
ENSG00000105186	-0.172246	-0.843961	0.1307	0.295259	no	0.447374	2.46532	5e-05	0.000394466	yes
ENSG00000105193	-0.128736	-1.08509	0.0606	0.165152	no	0.0317893	0.267362	0.6426	0.832319	no
ENSG00000105202	-0.412516	-3.22311	5e-05	0.000394466	yes	0.19278	1.49098	0.00995	0.0389552	yes
ENSG00000105204	0.356355	1.87039	0.00095	0.00542971	yes	0.25313	1.38188	0.01555	0.0560462	no
ENSG00000105219	0.737549	0	1	1	no	1.46333	1.03379	0.01765	0.0620523	no
ENSG00000105220	0.28877	2.06171	0.00055	0.00339017	yes	0.0200241	0.142925	0.79355	0.9162	no
ENSG00000105221	0.0283767	0.16528	0.7784	0.908979	no	-0.135581	-0.773986	0.18145	0.373023	no
ENSG00000105223	0.223809	1.27049	0.0247	0.0813778	no	-0.14115	-0.75637	0.18405	0.376315	no
ENSG00000105245	0.0588008	0.272995	0.6195	0.816938	no	0.11788	0.578856	0.2936	0.516949	no
ENSG00000105298	-0.24195	-2.07312	0.00025	0.00169574	yes	0.120013	1.03839	0.0646	0.173458	no
ENSG00000105323	-0.0498067	-0.203935	0.6813	0.856465	no	-0.0871685	-0.369936	0.48995	0.717247	no
ENSG00000105325	-0.149906	-0.316832	0.5814	0.788589	no	0.0564577	0.119119	0.8349	0.933995	no
ENSG00000105327	-0.108724	-0.724273	0.20455	0.404549	no	-0.111712	-0.759824	0.1788	0.369316	no
ENSG00000105339	0.276379	0.913213	0.0975	0.237366	no	0.164988	0.423577	0.42255	0.655374	no
ENSG00000105379	0.0915804	0.755703	0.1876	0.381419	no	-0.211138	-1.73352	0.0024	0.0119296	yes
ENSG00000105397	-0.00228878	-0.00982763	0.98605	0.991871	no	-0.076924	-0.345489	0.54485	0.761122	no
ENSG00000105426	-0.110884	-0.514931	0.35625	0.588048	no	-0.0186855	-0.0893385	0.872	0.94923	no
ENSG00000105518	0.0988136	0.517657	0.3707	0.603234	no	-0.758325	-3.73154	5e-05	0.000394466	yes
ENSG00000105520	0.319405	2.46603	5e-05	0.000394466	yes	0.261879	2.0499	0.00065	0.00390953	yes
ENSG00000105552	0.141832	1.1155	0.05315	0.14921	no	0.378746	3.01943	5e-05	0.000394466	yes
ENSG00000105556	0.0735233	0.305559	0.5567	0.770639	no	0.225712	1.21631	0.03045	0.0963499	no
ENSG00000105640	-0.0771313	-0.630539	0.26755	0.485095	no	-0.0500254	-0.411813	0.47225	0.702383	no
ENSG00000105649	-0.0806955	-0.286388	0.60925	0.809629	no	-0.104865	-0.33209	0.55605	0.770259	no
ENSG00000105655	0.278588	0.406764	0.4156	0.648517	no	0.183001	0.253979	0.60865	0.809181	no
ENSG00000105656	0.129067	0.840427	0.13135	0.296352	no	0.510438	3.56741	5e-05	0.000394466	yes
ENSG00000105662	-0.179109	-1.0547	0.0657	0.175832	no	0.16391	1.01768	0.07985	0.203954	no
ENSG00000105664	0.695111	2.01986	0.00025	0.00169574	yes	-0.499866	-1.21969	0.0154	0.0556431	no
ENSG00000105698	-0.10559	-0.569195	0.32365	0.552243	no	-0.177279	-0.917884	0.10765	0.255747	no
ENSG00000105700	-0.155867	-1.05679	0.06505	0.174387	no	0.0342611	0.236575	0.6804	0.856014	no
ENSG00000105707	0.235263	1.62851	0.0045	0.0201898	yes	0.217815	1.52486	0.0075	0.0308919	yes
ENSG00000105708	0.0204159	0.186436	0.7475	0.893949	no	-0.0644675	-0.585457	0.3113	0.537915	no
ENSG00000105726	-0.234168	-1.23561	0.0299	0.0949187	no	-0.0778044	-0.402706	0.4828	0.711005	no
ENSG00000105738	0.33598	0.61155	0.21225	0.415138	no	0.579775	1.24893	0.0089	0.0355916	yes
ENSG00000105778	-0.292622	-0.822041	0.1379	0.30683	no	0.137809	0.399118	0.47345	0.703317	no
ENSG00000105792	0.53713	1.89006	0.0005	0.00312122	yes	0.246219	0.896329	0.1096	0.25908	no
ENSG00000105793	0.00484281	0.0131662	0.98285	0.990569	no	0.0339393	0.0957911	0.86625	0.946655	no
ENSG00000105856	0.585009	2.47715	5e-05	0.000394466	yes	-0.00362761	-0.0145469	0.97925	0.988874	no
ENSG00000105865	-0.207188	-0.511017	0.3661	0.598245	no	-0.249569	-0.665	0.244	0.455919	no
ENSG00000105866	-0.206945	-0.831291	0.0696	0.183739	no	-0.291089	-1.16886	0.0187	0.0650828	no
ENSG00000105875	0.598588	2.52068	5e-05	0.000394466	yes	0.440788	2.1047	0.00035	0.00228343	yes
ENSG00000105877	0.204681	0	1	1	no	0.0166162	0	1	1	no
ENSG00000105926	-0.218832	-1.08183	0.0616	0.167366	no	0.566429	2.92734	5e-05	0.000394466	yes
ENSG00000105928	-0.226846	-0.817527	0.08925	0.222254	no	-0.75098	-2.3533	5e-05	0.000394466	yes
ENSG00000105953	-0.17442	-1.32757	0.0169	0.0599291	no	-0.0549094	-0.40779	0.4725	0.702547	no
ENSG00000105963	0.706675	2.39472	5e-05	0.000394466	yes	0.466032	1.54058	0.0047	0.0209396	yes
ENSG00000105968	-0.204031	-1.375	0.0172	0.0607944	no	-0.101424	-0.700036	0.22315	0.429525	no
ENSG00000105982	-0.586883	-0.519087	0.3695	0.601883	no	-1.42993	-1.09403	0.07795	0.2002	no
ENSG00000105983	-0.140149	-0.652587	0.25745	0.472506	no	0.0295538	0.137571	0.81115	0.923828	no
ENSG00000105993	0.201806	1.37727	0.01545	0.0557692	no	0.52913	3.57845	5e-05	0.000394466	yes
ENSG00000106009	0.0110157	0.0735798	0.89675	0.957946	no	0.111953	0.77146	0.1819	0.373574	no
ENSG00000106012	-0.130153	-0.582601	0.3116	0.538249	no	0.16934	0.828777	0.1402	0.310787	no
ENSG00000106049	-0.121359	-0.989555	0.0868	0.217532	no	-0.497366	-4.09061	5e-05	0.000394466	yes
ENSG00000106052	0.365497	2.86069	5e-05	0.000394466	yes	0.268767	2.09493	0.00025	0.00169574	yes
ENSG00000106070	0.0968267	0.556361	0.29235	0.515611	no	-0.132504	-0.743883	0.17105	0.358036	no
ENSG00000106078	0.0428241	0.27043	0.6273	0.821882	no	-0.181745	-1.18123	0.03845	0.116098	no
ENSG00000106105	-0.818917	-4.94129	5e-05	0.000394466	yes	-1.12099	-6.44074	5e-05	0.000394466	yes
ENSG00000106133	-0.00396819	-0.0148324	0.97915	0.988874	no	-0.151171	-0.611039	0.281	0.501891	no
ENSG00000106244	0.155934	0.495366	0.3733	0.606183	no	0.279704	0.886944	0.11875	0.275177	no
ENSG00000106245	-0.0704101	-0.183413	0.7471	0.893799	no	-0.0651847	-0.165947	0.77665	0.908105	no
ENSG00000106261	-0.144341	-0.573112	0.31745	0.544718	no	-0.189859	-0.707226	0.2172	0.421648	no
ENSG00000106263	0.0470555	0.293838	0.6015	0.803805	no	0.158204	0.968532	0.0887	0.221173	no
ENSG00000106266	0.0373929	0.0401078	0.9445	0.976247	no	0.0600606	0.0643201	0.9128	0.965187	no
ENSG00000106268	-0.611359	-5.05475	5e-05	0.000394466	yes	-0.353081	-3.02274	5e-05	0.000394466	yes
ENSG00000106299	0.363423	2.9776	5e-05	0.000394466	yes	-0.0744442	-0.605585	0.2862	0.508424	no
ENSG00000106346	0.189682	1.40336	0.01145	0.0437667	yes	0.439905	3.34229	5e-05	0.000394466	yes
ENSG00000106351	0.133205	1.03904	0.06975	0.184065	no	0.357117	2.81101	5e-05	0.000394466	yes
ENSG00000106392	0.257795	1.37257	0.0179	0.0627639	no	0.396132	2.25677	5e-05	0.000394466	yes
ENSG00000106399	-0.350444	-1.90047	0.0008	0.00468454	yes	-0.452187	-2.50424	5e-05	0.000394466	yes
ENSG00000106404	-0.148374	-0.734057	0.1769	0.366664	no	-0.0164769	-0.0814467	0.8836	0.953085	no
ENSG00000106415	0.379259	0.550374	0.3048	0.530374	no	0.707041	1.0968	0.03955	0.118656	no
ENSG00000106443	-0.140392	-0.974913	0.0792	0.202724	no	0.193301	1.34204	0.0169	0.0599291	no
ENSG00000106459	-0.263518	-1.45712	0.01245	0.0468391	yes	-0.152018	-0.822467	0.14575	0.319484	no
ENSG00000106460	0.186684	0.92519	0.1098	0.259442	no	-0.607911	-3.24678	5e-05	0.000394466	yes
ENSG00000106462	-0.752742	-5.75954	5e-05	0.000394466	yes	-0.514076	-3.57935	5e-05	0.000394466	yes
ENSG00000106479	-0.273222	-1.03073	0.074	0.192618	no	-0.467535	-1.72713	0.00355	0.0166083	yes
ENSG00000106484	-0.268669	-1.63294	0.00345	0.0162172	yes	0.230793	1.51861	0.00705	0.0293726	yes
ENSG00000106526	-0.199211	-0.658644	0.2451	0.457358	no	-0.261819	-0.792768	0.168	0.353616	no
ENSG00000106537	0.0732557	0.620627	0.2775	0.497758	no	0.175579	1.48843	0.00955	0.0377414	yes
ENSG00000106554	-0.36039	-2.57976	5e-05	0.000394466	yes	-0.0718122	-0.510007	0.37655	0.609281	no
ENSG00000106571	0.0934242	0.184911	0.73945	0.889972	no	-0.340191	-0.610921	0.27385	0.493304	no
ENSG00000106603	-0.405129	-2.60633	5e-05	0.000394466	yes	-0.168756	-1.05003	0.06625	0.176902	no
ENSG00000106605	0.113287	0.90569	0.1115	0.262373	no	-0.149169	-1.18864	0.03755	0.113934	no
ENSG00000106608	-0.139211	-0.560756	0.2822	0.503303	no	0.102778	0.405697	0.4493	0.681387	no
ENSG00000106609	0.197851	1.12869	0.0486	0.13903	no	0.408102	2.38685	0.0001	0.000748217	yes
ENSG00000106610	-0.413054	-2.60616	5e-05	0.000394466	yes	-0.313794	-1.51935	0.01385	0.0510451	no
ENSG00000106615	-0.00666155	-0.0480314	0.934	0.972741	no	0.100633	0.719866	0.2074	0.408712	no
ENSG00000106628	-0.169328	-1.1514	0.03805	0.115047	no	0.0411351	0.276482	0.6214	0.818255	no
ENSG00000106636	0.152207	1.0571	0.0597	0.163293	no	0.0897644	0.608748	0.28475	0.506611	no
ENSG00000106682	0.0913923	0.705393	0.2151	0.418775	no	0.109012	0.82529	0.14955	0.325789	no
ENSG00000106701	-0.260318	-0.865306	0.1249	0.285392	no	-0.0556568	-0.170714	0.76045	0.900376	no
ENSG00000106723	-0.142219	-0.76346	0.18515	0.378006	no	-0.577378	-3.02999	5e-05	0.000394466	yes
ENSG00000106771	0.285529	1.84053	0.001	0.00567333	yes	0.310496	2.02003	0.00015	0.00108114	yes
ENSG00000106772	0.378326	1.71729	0.0007	0.00417041	yes	0.107008	0.481023	0.34935	0.580534	no
ENSG00000106789	-0.0737657	-0.615784	0.28285	0.504187	no	0.334576	2.79602	5e-05	0.000394466	yes
ENSG00000106799	-0.220026	-1.06056	0.0603	0.164488	no	-0.652644	-3.23782	5e-05	0.000394466	yes
ENSG00000106803	-0.00371529	-0.0309267	0.9567	0.980567	no	0.187884	1.5637	0.00625	0.0265855	yes
ENSG00000106809	-0.707677	0	1	1	no	1.61389	0	1	1	no
ENSG00000106819	-0.47905	0	1	1	no	0.896159	0	1	1	no
ENSG00000106823	0.0991476	0	1	1	no	1.33714	0	1	1	no
ENSG00000106948	-0.570488	-2.06517	0.0002	0.00139451	yes	-0.442667	-1.65329	0.0019	0.00979865	yes
ENSG00000106992	0.0816118	0.430226	0.4513	0.683186	no	-0.0348322	-0.1731	0.76345	0.901981	no
ENSG00000106993	0.237173	1.57148	0.00605	0.0258719	yes	0.262074	1.72076	0.0024	0.0119296	yes
ENSG00000107020	0.0180994	0.167302	0.7749	0.907244	no	-1.40656	-11.8155	5e-05	0.000394466	yes
ENSG00000107036	-0.0855282	-0.339651	0.52745	0.747831	no	0.418947	1.60593	0.0048	0.0213063	yes
ENSG00000107077	0.401035	2.0535	0.0002	0.00139451	yes	0.261409	1.33994	0.01475	0.0537151	no
ENSG00000107130	-0.490211	-3.91505	5e-05	0.000394466	yes	0.136248	1.11236	0.04855	0.138908	no
ENSG00000107147	2.3429	0	1	1	no	-0.0104568	0	1	1	no
ENSG00000107164	0.185628	1.05411	0.0499	0.141942	no	0.143186	0.838876	0.12125	0.279334	no
ENSG00000107186	-0.00785246	-0.0288689	0.9576	0.980753	no	-0.379637	-1.02785	0.0768	0.198091	no
ENSG00000107187	-0.768685	0	1	1	no	-0.222047	0	1	1	no
ENSG00000107201	-0.0234428	-0.174743	0.7621	0.901254	no	-0.132564	-0.913192	0.10825	0.256809	no
ENSG00000107262	-0.44121	-3.65674	5e-05	0.000394466	yes	0.120972	0.921552	0.10455	0.250023	no
ENSG00000107263	-0.387372	-1.08912	0.06075	0.165511	no	-0.164496	-0.548155	0.33765	0.567888	no
ENSG00000107281	-0.0472831	-0.298515	0.60445	0.806229	no	-0.441112	-2.95664	5e-05	0.000394466	yes
ENSG00000107282	-0.012507	-0.0112145	0.9837	0.990838	no	-0.990906	-0.65128	0.1838	0.37604	no
ENSG00000107290	0.171739	0.869466	0.09095	0.225464	no	0.347533	1.75106	0.002	0.0102249	yes
ENSG00000107295	-0.511987	-0.668741	0.10965	0.259165	no	-2.30015	-1.39842	0.00045	0.00285055	yes
ENSG00000107338	0.11787	0.171063	0.77005	0.905032	no	0.0560213	0.076709	0.89945	0.959126	no
ENSG00000107341	0.0869072	0.704421	0.21445	0.417876	no	0.225724	1.8405	0.00155	0.00824944	yes
ENSG00000107362	0.019208	0.17374	0.76255	0.901494	no	0.19061	1.72707	0.0025	0.0123557	yes
ENSG00000107372	-0.111477	-0.649368	0.2575	0.472536	no	0.0212118	0.122846	0.83215	0.932783	no
ENSG00000107404	0.11455	0.864953	0.134	0.300556	no	0.295938	2.24418	0.0001	0.000748217	yes
ENSG00000107438	-0.105667	-0.858995	0.1292	0.292814	no	0.117106	0.972161	0.0891	0.22197	no
ENSG00000107560	0.0407427	0.180246	0.7482	0.894362	no	-0.345967	-1.65859	0.00375	0.0173767	yes
ENSG00000107566	-1.25404	-3.58862	5e-05	0.000394466	yes	-1.39207	-3.75392	5e-05	0.000394466	yes
ENSG00000107581	0.0162432	0.135645	0.81575	0.925717	no	0.0933825	0.776393	0.17905	0.36964	no
ENSG00000107614	-0.435341	-1.8434	0.00045	0.00285055	yes	-0.929888	-3.54288	5e-05	0.000394466	yes
ENSG00000107625	-0.10532	-0.784874	0.16135	0.343879	no	-0.139783	-1.02503	0.07355	0.191636	no
ENSG00000107643	-0.0614972	-0.283792	0.624	0.819594	no	0.0268425	0.133058	0.8107	0.923506	no
ENSG00000107669	-0.136684	-0.762624	0.143	0.315165	no	-0.231808	-1.26767	0.0132	0.0490839	yes
ENSG00000107672	-0.0526455	-0.377118	0.50785	0.732393	no	-0.0725682	-0.523682	0.3592	0.591296	no
ENSG00000107679	0.228586	1.22907	0.03175	0.0996831	no	0.257615	1.34778	0.0193	0.0668141	no
ENSG00000107736	0.0864673	0.199135	0.7196	0.879654	no	-0.523298	-1.13894	0.03065	0.096861	no
ENSG00000107745	0.236598	1.68712	0.0028	0.0135814	yes	0.150222	1.06355	0.06125	0.166571	no
ENSG00000107771	0.0598771	0.258073	0.6486	0.836121	no	0.239023	1.00233	0.0759	0.1963	no
ENSG00000107779	0.158548	0.394736	0.48535	0.713171	no	0.0651602	0.157863	0.78285	0.91114	no
ENSG00000107816	-0.0771337	-0.470806	0.4156	0.648517	no	-0.0793087	-0.529562	0.34735	0.57853	no
ENSG00000107829	-0.482846	-3.01132	5e-05	0.000394466	yes	-0.840875	-4.63518	5e-05	0.000394466	yes
ENSG00000107833	-0.326012	-2.31369	5e-05	0.000394466	yes	0.362065	2.58903	5e-05	0.000394466	yes
ENSG00000107862	0.0206122	0.126883	0.8184	0.927071	no	0.296692	1.83653	0.0026	0.0127622	yes
ENSG00000107863	-0.127763	-0.645261	0.22545	0.432479	no	-0.27177	-1.29273	0.01475	0.0537151	no
ENSG00000107864	0.0889417	0.635098	0.2636	0.480103	no	0.140658	1.05458	0.06845	0.181473	no
ENSG00000107872	0.181397	0.977165	0.08465	0.21339	no	0.0062469	0.0293659	0.9585	0.981062	no
ENSG00000107882	-0.228834	-1.26637	0.0221	0.0744866	no	0.128843	0.68692	0.21345	0.416676	no
ENSG00000107890	-0.202538	-0.987511	0.0801	0.204479	no	-0.334536	-1.50408	0.00995	0.0389552	yes
ENSG00000107902	0.12165	0.244562	0.64015	0.830563	no	-0.913254	-1.45335	0.00945	0.037437	yes
ENSG00000107929	-0.12603	-0.629254	0.264	0.480594	no	-0.204038	-1.01156	0.07025	0.185067	no
ENSG00000107937	0.0682939	0.411945	0.45945	0.690709	no	0.361824	2.24752	0.0001	0.000748217	yes
ENSG00000107938	0.254434	1.53804	0.00665	0.0280372	yes	0.108414	0.656731	0.24015	0.451192	no
ENSG00000107949	0.220872	1.43971	0.0126	0.0472942	yes	0.363184	2.39463	0.0001	0.000748217	yes
ENSG00000107951	-0.0820254	-0.37192	0.50935	0.733548	no	0.295856	1.39111	0.01355	0.0501329	no
ENSG00000107968	0.381801	2.52208	5e-05	0.000394466	yes	-0.203584	-1.34089	0.0199	0.0684973	no
ENSG00000108010	0.138425	1.11806	0.04405	0.128971	no	0.354049	2.87064	5e-05	0.000394466	yes
ENSG00000108021	-0.148422	-0.503254	0.38665	0.619757	no	0.26904	0.914246	0.1174	0.272665	no
ENSG00000108039	-0.0175744	-0.116091	0.83845	0.935585	no	0.272392	1.8036	0.00095	0.00542971	yes
ENSG00000108061	0.1514	0.693871	0.20395	0.403737	no	0.385768	1.93428	0.0006	0.00365163	yes
ENSG00000108091	-0.261571	-1.91169	0.0011	0.00616363	yes	0.288629	2.12664	0.00025	0.00169574	yes
ENSG00000108094	-0.0497128	-0.30664	0.5879	0.793384	no	0.173094	1.0571	0.06215	0.168414	no
ENSG00000108100	0.130813	0.632314	0.2682	0.48586	no	0.337182	1.60168	0.00525	0.0229379	yes
ENSG00000108107	-0.0476301	-0.280652	0.6173	0.815318	no	0.217389	1.29021	0.0252	0.0826808	no
ENSG00000108175	0.1649	0.580818	0.2919	0.515014	no	0.445049	1.83038	0.00505	0.0222042	yes
ENSG00000108179	-0.302029	-2.23341	5e-05	0.000394466	yes	0.222046	1.63954	0.0044	0.0198021	yes
ENSG00000108187	0.379479	0.976692	0.06995	0.184461	no	-0.511587	-1.19066	0.03005	0.0953239	no
ENSG00000108219	-0.341718	-2.15495	0.00015	0.00108114	yes	0.0972255	0.566748	0.32215	0.550345	no
ENSG00000108239	-0.0752425	-0.603891	0.278	0.498268	no	-0.0938512	-0.751362	0.17465	0.363346	no
ENSG00000108256	0.0506712	0.182386	0.7406	0.89064	no	0.238712	0.904227	0.10335	0.247978	no
ENSG00000108298	0.0620707	0.526405	0.35665	0.588498	no	0.13607	1.15227	0.04425	0.129447	no
ENSG00000108306	-0.307075	-0.746592	0.19035	0.384961	no	0.251774	0.66169	0.2436	0.455495	no
ENSG00000108349	0.0214727	0.12061	0.8263	0.930331	no	-0.0598991	-0.350617	0.5318	0.751076	no
ENSG00000108352	-0.192436	-0.696504	0.1834	0.37554	no	0.43737	2.08502	5e-05	0.000394466	yes
ENSG00000108379	0.59544	3.62091	5e-05	0.000394466	yes	0.348183	2.00346	0.0004	0.00256373	yes
ENSG00000108424	0.114703	0.611755	0.27625	0.496271	no	0.213219	1.15458	0.03985	0.119317	no
ENSG00000108433	0.231685	1.43516	0.0119	0.0451471	yes	0.346737	2.16876	5e-05	0.000394466	yes
ENSG00000108443	0.133752	0.572033	0.3152	0.542319	no	0.115613	0.501743	0.38115	0.614194	no
ENSG00000108465	-0.033693	-0.137317	0.8126	0.924396	no	-0.138865	-0.567501	0.323	0.55144	no
ENSG00000108468	0.00898065	0.0699001	0.89915	0.959009	no	0.20589	1.56494	0.0059	0.0253499	yes
ENSG00000108506	-0.141206	-0.901264	0.0892	0.22215	no	0.00560729	0.0367896	0.94165	0.975188	no
ENSG00000108510	0.225809	1.01667	0.0607	0.165416	no	0.0321527	0.137586	0.80145	0.919551	no
ENSG00000108557	-0.0640676	-0.119791	0.798	0.918332	no	-0.112003	-0.196906	0.66815	0.848155	no
ENSG00000108576	-0.486882	0	1	1	no	-0.566548	0	1	1	no
ENSG00000108582	0.016265	0.0766888	0.8724	0.94933	no	-1.04566	-5.02749	5e-05	0.000394466	yes
ENSG00000108587	0.254809	1.29147	0.0253	0.0829745	no	0.00130554	0.00677799	0.99085	0.994225	no
ENSG00000108592	0.00634633	0.0247832	0.96335	0.982561	no	0.0966363	0.379984	0.45665	0.688162	no
ENSG00000108599	0.113707	0.622133	0.25565	0.470184	no	0.0172488	0.0882101	0.8755	0.950742	no
ENSG00000108602	-1.31554	0	1	1	no	-1.41143	0	1	1	no
ENSG00000108604	-0.0119896	-0.086418	0.878	0.951535	no	-0.0414572	-0.302201	0.58925	0.794431	no
ENSG00000108622	Inf	0	1	1	no	Inf	0	1	1	no
ENSG00000108639	0.170649	1.37755	0.0178	0.0624726	no	0.00617292	0.0496237	0.933	0.972719	no
ENSG00000108641	-0.303321	-1.53331	0.00595	0.0255172	yes	-0.54709	-2.51791	5e-05	0.000394466	yes
ENSG00000108654	0.0873475	0.498954	0.38245	0.615662	no	-0.0904669	-0.508776	0.36585	0.598083	no
ENSG00000108669	0.0160084	0.112276	0.84615	0.938843	no	0.151029	0.95672	0.0928	0.22877	no
ENSG00000108671	0.103124	0.572469	0.32175	0.549899	no	0.192294	1.04312	0.0708	0.18617	no
ENSG00000108774	0.0785169	0.441539	0.4352	0.668071	no	0.468345	2.62182	5e-05	0.000394466	yes
ENSG00000108784	0.137239	0.505649	0.3742	0.606986	no	-0.0809077	-0.294533	0.60865	0.809181	no
ENSG00000108819	-0.0125435	-0.0820992	0.88645	0.95412	no	0.187897	1.23954	0.02865	0.0917977	no
ENSG00000108826	0.153377	1.191	0.03985	0.119317	no	0.0689078	0.533273	0.34705	0.578204	no
ENSG00000108848	0.0144694	0.0889596	0.868	0.947464	no	0.146939	0.882944	0.1064	0.253517	no
ENSG00000108854	-0.0311756	-0.0499814	0.9227	0.969069	no	-0.172179	-0.28018	0.5862	0.791919	no
ENSG00000108932	0.0548529	0.065538	0.8986	0.958776	no	0.466772	0.668829	0.1894	0.383656	no
ENSG00000108946	0.788521	4.53586	5e-05	0.000394466	yes	0.244288	1.39086	0.0141	0.0517667	no
ENSG00000108953	0.157915	1.01684	0.0761	0.196716	no	0.14039	0.900098	0.11605	0.270243	no
ENSG00000108984	-0.341309	-2.3519	5e-05	0.000394466	yes	-0.357854	-2.09509	0.00035	0.00228343	yes
ENSG00000109046	-0.0507323	-0.348411	0.53735	0.755274	no	-0.0628003	-0.439249	0.4411	0.673655	no
ENSG00000109062	0.265981	1.75427	0.0026	0.0127622	yes	0.611861	4.14764	5e-05	0.000394466	yes
ENSG00000109066	0.25683	0.455504	0.34095	0.571601	no	0.426364	1.21092	0.0224	0.075287	no
ENSG00000109084	-0.209837	-1.27262	0.02585	0.0844582	no	0.210223	1.30717	0.02045	0.0699773	no
ENSG00000109111	0.269946	1.26197	0.01625	0.0580254	no	0.46991	2.16091	0.00015	0.00108114	yes
ENSG00000109118	0.421889	1.8637	0.00155	0.00824944	yes	-0.087682	-0.405721	0.4773	0.706535	no
ENSG00000109171	0.0565095	0.18024	0.75325	0.896991	no	0.339241	1.07695	0.0597	0.163293	no
ENSG00000109180	0.105878	0.843241	0.1404	0.311068	no	-0.0255124	-0.201576	0.726	0.882879	no
ENSG00000109184	-0.598142	-2.74845	5e-05	0.000394466	yes	-0.359661	-1.75744	0.00205	0.010441	yes
ENSG00000109189	0.0298587	0.153603	0.78355	0.911591	no	-0.0908099	-0.476585	0.4054	0.638302	no
ENSG00000109220	-0.169128	-0.507873	0.3805	0.613566	no	0.238274	0.757053	0.1904	0.384964	no
ENSG00000109270	0.242189	1.67264	0.00345	0.0162172	yes	0.367064	2.57039	5e-05	0.000394466	yes
ENSG00000109320	-0.00402786	-0.0244884	0.96505	0.983002	no	0.298567	1.65353	0.00425	0.0192412	yes
ENSG00000109323	0.237826	1.1731	0.04145	0.122886	no	0.0538646	0.260587	0.65225	0.838387	no
ENSG00000109332	0.336144	2.10984	0.0001	0.000748217	yes	0.212299	1.35255	0.0176	0.0619316	no
ENSG00000109390	-0.0278688	-0.112868	0.8448	0.93836	no	-0.048731	-0.191171	0.7427	0.891539	no
ENSG00000109445	-0.0570748	-0.432644	0.4501	0.682152	no	0.248759	1.72098	0.00265	0.0129582	yes
ENSG00000109452	0.424075	2.12625	0.0002	0.00139451	yes	0.436618	2.31773	0.00015	0.00108114	yes
ENSG00000109458	0.160883	0.492718	0.36715	0.599253	no	-0.408832	-1.12762	0.03475	0.107098	no
ENSG00000109466	0.296736	0.866894	0.127	0.289081	no	0.0900739	0.277547	0.623	0.819174	no
ENSG00000109501	0.407375	2.3787	5e-05	0.000394466	yes	0.4867	3.04059	5e-05	0.000394466	yes
ENSG00000109536	-0.143898	-1.2371	0.03025	0.0958156	no	-0.0964571	-0.826142	0.1492	0.325218	no
ENSG00000109572	0.305334	1.72733	0.0024	0.0119296	yes	0.0269869	0.151836	0.78165	0.91047	no
ENSG00000109576	-0.43427	-3.16081	5e-05	0.000394466	yes	0.278437	2.0613	0.00055	0.00339017	yes
ENSG00000109586	0.42741	2.82454	5e-05	0.000394466	yes	-0.362038	-2.45414	5e-05	0.000394466	yes
ENSG00000109606	-0.113895	-0.817151	0.14785	0.323	no	0.146851	1.05584	0.06035	0.164584	no
ENSG00000109618	0.077512	0.430091	0.4412	0.673734	no	-0.253077	-1.38215	0.01425	0.052217	no
ENSG00000109670	0.0340535	0.210208	0.7179	0.87874	no	0.375615	1.89204	0.00195	0.0100062	yes
ENSG00000109680	0.0208815	0.135615	0.8101	0.923259	no	0.00883958	0.0580847	0.9165	0.966603	no
ENSG00000109685	0.139051	0.688048	0.22465	0.431482	no	0.698399	3.58418	5e-05	0.000394466	yes
ENSG00000109686	0.0236217	0.0359795	0.9372	0.973596	no	-0.25685	-0.345581	0.44555	0.677891	no
ENSG00000109689	-0.156863	-0.739985	0.1933	0.389023	no	-0.226238	-1.14568	0.04505	0.131288	no
ENSG00000109736	0.0665026	0.556782	0.3275	0.55643	no	-0.277652	-2.23612	5e-05	0.000394466	yes
ENSG00000109756	-0.147076	-0.609757	0.28645	0.508737	no	-0.0890389	-0.354991	0.5387	0.756359	no
ENSG00000109805	-0.494645	-2.45884	5e-05	0.000394466	yes	-0.235616	-1.27965	0.0259	0.0845816	no
ENSG00000109861	-0.541283	-3.56314	5e-05	0.000394466	yes	0.0266393	0.150256	0.7943	0.916512	no
ENSG00000109881	-0.585819	-4.08631	5e-05	0.000394466	yes	-0.184167	-1.36745	0.01705	0.060376	no
ENSG00000109906	0.532738	3.34733	5e-05	0.000394466	yes	0.489616	2.93678	5e-05	0.000394466	yes
ENSG00000109920	-0.123592	-0.576037	0.31625	0.54335	no	-0.123707	-0.576371	0.32065	0.548595	no
ENSG00000109927	0.16995	0	1	1	no	-0.785643	0	1	1	no
ENSG00000110047	-0.0111197	-0.0356007	0.9486	0.977908	no	0.325626	1.34856	0.0149	0.0541652	no
ENSG00000110063	-0.2244	-1.56433	0.00775	0.0317375	yes	-0.118361	-0.759983	0.18325	0.375358	no
ENSG00000110066	0.323898	2.04794	0.00035	0.00228343	yes	0.33364	2.0342	0.0001	0.000748217	yes
ENSG00000110074	-0.346765	-1.29688	0.01865	0.0649332	no	-0.0642514	-0.244813	0.64305	0.832629	no
ENSG00000110075	0.234766	1.26694	0.0261	0.0850943	no	0.446869	2.4201	5e-05	0.000394466	yes
ENSG00000110090	0.302152	2.15984	5e-05	0.000394466	yes	-0.170815	-1.23558	0.02095	0.0713663	no
ENSG00000110092	0.430706	2.23115	0.0002	0.00139451	yes	0.177807	0.957405	0.08985	0.223497	no
ENSG00000110107	0.0387162	0.306005	0.5867	0.792247	no	0.095799	0.755202	0.17515	0.364113	no
ENSG00000110172	-0.271537	-1.66694	0.0035	0.016423	yes	0.313546	1.96651	0.0006	0.00365163	yes
ENSG00000110218	-0.0747423	-0.677252	0.2374	0.447894	no	-0.0169049	-0.14714	0.79795	0.918331	no
ENSG00000110237	-0.0649405	-0.278107	0.63245	0.825504	no	0.0197362	0.0831658	0.88585	0.953825	no
ENSG00000110274	0.00569282	0.0143144	0.98065	0.989656	no	0.18578	0.484788	0.39565	0.628688	no
ENSG00000110321	0.142581	0.864628	0.09585	0.234266	no	0.270118	1.65953	0.00135	0.00733226	yes
ENSG00000110328	0.216585	1.99866	0.0005	0.00312122	yes	0.207388	1.88454	0.0007	0.00417041	yes
ENSG00000110330	0.379018	2.40254	5e-05	0.000394466	yes	0.535951	3.67902	5e-05	0.000394466	yes
ENSG00000110344	0.132505	0.817865	0.15605	0.335723	no	0.0799324	0.488322	0.3864	0.619589	no
ENSG00000110367	0.0279873	0.206726	0.7117	0.875193	no	0.188625	1.40026	0.01295	0.0483556	yes
ENSG00000110395	-0.0783501	-0.719215	0.20795	0.409344	no	0.0951822	0.883148	0.1217	0.280079	no
ENSG00000110422	0.348633	2.60252	5e-05	0.000394466	yes	0.128549	0.943675	0.0953	0.233354	no
ENSG00000110429	0.0996043	0.639079	0.2572	0.472173	no	-0.0592735	-0.36822	0.5112	0.735295	no
ENSG00000110435	0.297306	1.68921	0.00265	0.0129582	yes	0.45812	2.71507	5e-05	0.000394466	yes
ENSG00000110448	Inf	0	1	1	no	Inf	0	1	1	no
ENSG00000110497	0.298028	1.14527	0.041	0.121845	no	0.336936	1.32167	0.0196	0.0676202	no
ENSG00000110514	0.192661	0.698913	0.1372	0.305789	no	0.257732	0.943981	0.0482	0.138071	no
ENSG00000110583	-0.0162048	-0.0777037	0.89485	0.95726	no	0.375963	1.8642	0.00135	0.00733226	yes
ENSG00000110619	-0.264283	-1.97381	0.0007	0.00417041	yes	-0.640653	-4.78051	5e-05	0.000394466	yes
ENSG00000110651	-0.0533693	-0.418946	0.46735	0.697981	no	0.0655963	0.516546	0.36725	0.599399	no
ENSG00000110660	0.00573495	0.0434096	0.9368	0.973596	no	0.412424	3.18995	5e-05	0.000394466	yes
ENSG00000110696	0.0509843	0.361077	0.5244	0.745357	no	0.0937827	0.649762	0.25355	0.467704	no
ENSG00000110721	-0.305874	-1.29083	0.02245	0.0754093	no	-0.351999	-1.45778	0.01105	0.0425401	yes
ENSG00000110841	0.22526	0.97591	0.08965	0.2231	no	0.0874346	0.386998	0.48725	0.714768	no
ENSG00000110876	-2.97382	0	1	1	no	-0.212666	0	1	1	no
ENSG00000110880	-0.13311	-0.760183	0.1808	0.372101	no	0.410129	2.4236	5e-05	0.000394466	yes
ENSG00000110888	0.201681	1.09532	0.05495	0.153022	no	0.0758456	0.412765	0.4641	0.695058	no
ENSG00000110906	-0.0100769	-0.0394996	0.9445	0.976247	no	0.555426	2.29241	0.00015	0.00108114	yes
ENSG00000110911	-0.16665	-0.861697	0.1229	0.282149	no	-0.0846641	-0.469485	0.40005	0.633046	no
ENSG00000110917	0.0652093	0.265127	0.6409	0.83105	no	0.492721	2.01391	0.00025	0.00169574	yes
ENSG00000110925	0.0758602	0.393516	0.48925	0.716582	no	-0.00170691	-0.00958093	0.9859	0.991828	no
ENSG00000110931	-0.291836	-2.03332	0.00025	0.00169574	yes	-0.229781	-1.63348	0.0029	0.0139832	yes
ENSG00000110944	0.550743	2.14204	0.0005	0.00312122	yes	0.87682	3.58193	5e-05	0.000394466	yes
ENSG00000110958	-0.145832	-1.23087	0.03405	0.105363	no	0.0832589	0.70152	0.2216	0.427462	no
ENSG00000111110	0.230941	0.868483	0.1307	0.295259	no	0.21104	0.841193	0.1431	0.315285	no
ENSG00000111142	0.154648	1.02206	0.05405	0.151146	no	0.583416	3.95703	5e-05	0.000394466	yes
ENSG00000111215	0.0643966	0.222679	0.68835	0.860717	no	0.0458702	0.167267	0.75365	0.897162	no
ENSG00000111224	0.263001	0.862327	0.1361	0.303973	no	-0.291357	-0.980811	0.09155	0.226606	no
ENSG00000111249	-0.529082	-0.654697	0.2109	0.413315	no	-0.641606	-0.792301	0.11675	0.271406	no
ENSG00000111266	0.432682	2.17256	0.0001	0.000748217	yes	0.49669	2.5018	5e-05	0.000394466	yes
ENSG00000111275	-0.275684	-1.59255	0.00595	0.0255172	yes	-0.541466	-3.07779	5e-05	0.000394466	yes
ENSG00000111300	-0.0315453	-0.105468	0.85235	0.941215	no	0.12078	0.443151	0.42655	0.65916	no
ENSG00000111305	0.11309	0	1	1	no	-0.133527	0	1	1	no
ENSG00000111319	0.502812	1.51961	0.0038	0.0175716	yes	0.424608	1.2496	0.0184	0.0642	no
ENSG00000111364	0.110106	0.439844	0.4112	0.644047	no	0.257769	1.01891	0.05315	0.14921	no
ENSG00000111371	-0.294547	-1.7931	0.00015	0.00108114	yes	-0.435783	-2.71297	5e-05	0.000394466	yes
ENSG00000111445	-0.635356	-2.05645	0.0004	0.00256373	yes	-0.0944382	-0.366035	0.5103	0.734458	no
ENSG00000111450	-0.741244	-4.65583	5e-05	0.000394466	yes	-0.715956	-4.61469	5e-05	0.000394466	yes
ENSG00000111481	0.299621	0.920401	0.10795	0.256262	no	-0.0429576	-0.121196	0.834	0.933535	no
ENSG00000111490	-0.136033	-0.55957	0.33085	0.560333	no	0.189251	0.784222	0.1724	0.360113	no
ENSG00000111554	-0.213626	-1.17403	0.0357	0.109399	no	0.186285	1.13961	0.04595	0.133315	no
ENSG00000111596	-0.076518	-0.301917	0.60535	0.807022	no	0.158114	0.658815	0.2492	0.462468	no
ENSG00000111605	-0.0621397	-0.395724	0.47845	0.707424	no	0.163482	1.04826	0.0637	0.171632	no
ENSG00000111615	-0.0327698	-0.191675	0.73815	0.88918	no	0.568988	3.3379	5e-05	0.000394466	yes
ENSG00000111640	0.293084	2.38493	5e-05	0.000394466	yes	0.251592	2.05842	0.0004	0.00256373	yes
ENSG00000111642	-0.0236618	-0.0725533	0.88045	0.952438	no	0.19167	0.566257	0.24315	0.455022	no
ENSG00000111647	0.101424	0.594725	0.2894	0.512252	no	0.13003	0.714055	0.20395	0.403737	no
ENSG00000111666	0.156972	1.27762	0.023	0.0769115	no	0.136101	1.09905	0.05215	0.146998	no
ENSG00000111667	0.085468	0.447325	0.43375	0.666603	no	-0.0773611	-0.3961	0.48585	0.713622	no
ENSG00000111670	-0.117494	-0.490064	0.3848	0.617864	no	0.276967	1.20849	0.0332	0.103235	no
ENSG00000111676	0.0951012	0.573049	0.31335	0.540244	no	-0.0841199	-0.507171	0.37355	0.606482	no
ENSG00000111678	-0.00654207	-0.0539261	0.92485	0.970021	no	-0.560574	-4.59473	5e-05	0.000394466	yes
ENSG00000111679	0.309936	1.93627	0.0009	0.00518136	yes	-0.0124862	-0.07728	0.88935	0.955348	no
ENSG00000111696	0.171041	0.96037	0.0689	0.182421	no	0.274065	1.41316	0.01075	0.0415701	yes
ENSG00000111707	0.012118	0.0608844	0.9165	0.966603	no	-0.106314	-0.580109	0.30375	0.529029	no
ENSG00000111731	-0.199152	-0.988268	0.07385	0.1923	no	-0.319799	-1.57651	0.00375	0.0173767	yes
ENSG00000111737	-0.077463	-0.453806	0.4249	0.657619	no	0.0273838	0.172594	0.7651	0.902698	no
ENSG00000111752	0.0979874	0.164435	0.77665	0.908105	no	-0.0649898	-0.0941386	0.87255	0.949381	no
ENSG00000111783	-0.35734	0	1	1	no	0.807778	0	1	1	no
ENSG00000111785	0.219307	0.762073	0.15565	0.335097	no	0.4824	1.69483	0.00295	0.0141872	yes
ENSG00000111786	-0.0230063	-0.181357	0.7542	0.897427	no	0.11442	0.898622	0.1193	0.27607	no
ENSG00000111790	0.101575	0.715037	0.2099	0.411865	no	0.0182317	0.14712	0.79825	0.91839	no
ENSG00000111817	0.847066	0.908461	0.1354	0.302825	no	0.914506	0.987404	0.11465	0.267997	no
ENSG00000111834	0.292454	0	1	1	no	1.73697	2.62104	5e-05	0.000394466	yes
ENSG00000111837	-0.26176	-0.445599	0.4218	0.654779	no	0.289258	0.542528	0.34485	0.576116	no
ENSG00000111875	-0.0459682	-0.278039	0.6262	0.821217	no	-0.525239	-2.97186	5e-05	0.000394466	yes
ENSG00000111879	-0.170804	-0.416249	0.42205	0.655002	no	-0.164524	-0.426707	0.41715	0.650185	no
ENSG00000111897	0.126735	1.07496	0.05985	0.163566	no	0.0722632	0.612769	0.28325	0.504705	no
ENSG00000111906	-0.158979	-0.835949	0.1414	0.312596	no	0.153151	0.832273	0.14245	0.314265	no
ENSG00000111907	-0.029161	-0.166752	0.76985	0.905027	no	-0.0169649	-0.0924387	0.87105	0.948849	no
ENSG00000111961	0.0865366	0.494064	0.3457	0.576962	no	-0.586086	-3.62876	5e-05	0.000394466	yes
ENSG00000112033	0.303994	1.95381	0.00085	0.00494128	yes	0.522114	3.4126	5e-05	0.000394466	yes
ENSG00000112079	0.359745	3.47981	5e-05	0.000394466	yes	0.313184	3.02249	5e-05	0.000394466	yes
ENSG00000112081	-0.118324	-0.808993	0.1621	0.344987	no	0.167248	1.15011	0.04205	0.124279	no
ENSG00000112096	-0.456646	-0.656983	0.20445	0.404453	no	-0.00396528	-0.00586531	0.98975	0.993499	no
ENSG00000112130	-0.226773	-1.86592	0.0012	0.00663203	yes	0.45619	3.85681	5e-05	0.000394466	yes
ENSG00000112210	-0.275476	-0.684629	0.2321	0.441035	no	-0.657735	-1.58562	0.0067	0.0282137	yes
ENSG00000112218	-0.151639	-0.916291	0.11015	0.260002	no	-0.60939	-4.05562	5e-05	0.000394466	yes
ENSG00000112234	-0.355875	-2.59909	5e-05	0.000394466	yes	-0.95264	-6.67559	5e-05	0.000394466	yes
ENSG00000112237	0.244087	1.63814	0.00195	0.0100062	yes	0.695865	4.78409	5e-05	0.000394466	yes
ENSG00000112242	-0.316653	-2.61421	5e-05	0.000394466	yes	0.195255	1.48005	0.0111	0.042697	yes
ENSG00000112249	0.0215651	0.137523	0.8019	0.919705	no	0.081112	0.501474	0.36805	0.600227	no
ENSG00000112290	-0.258836	-1.09246	0.0527	0.148217	no	0.0953123	0.403392	0.45465	0.68625	no
ENSG00000112294	-0.0419574	-0.1343	0.80635	0.92164	no	-0.507025	-1.35137	0.02045	0.0699773	no
ENSG00000112304	0.00370465	0.00909874	0.98725	0.992403	no	-0.276377	-0.662029	0.24755	0.460548	no
ENSG00000112305	0.191843	1.3495	0.01795	0.0629153	no	-0.116767	-0.75214	0.1825	0.374265	no
ENSG00000112320	0.367543	1.1747	0.0352	0.108202	no	0.38527	1.29748	0.0193	0.0668141	no
ENSG00000112339	-0.110791	-0.61756	0.28075	0.501606	no	-0.144875	-0.799364	0.1635	0.347139	no
ENSG00000112357	0.145932	1.28604	0.0244	0.0806003	no	-0.706009	-5.80719	5e-05	0.000394466	yes
ENSG00000112367	-0.276291	-1.33639	0.02035	0.0697213	no	-0.413385	-2.15363	0.0002	0.00139451	yes
ENSG00000112379	0.220206	1.87982	0.0007	0.00417041	yes	0.00749664	0.0639951	0.91045	0.963898	no
ENSG00000112394	-0.134787	-0.617951	0.28345	0.504931	no	0.108485	0.518172	0.36715	0.599253	no
ENSG00000112414	0.749602	3.23981	5e-05	0.000394466	yes	0.129896	0.531924	0.34085	0.571502	no
ENSG00000112419	0.146816	0.448913	0.4101	0.642997	no	-0.0585514	-0.166549	0.7566	0.898547	no
ENSG00000112425	-0.0624753	-0.255686	0.6418	0.831691	no	-0.251289	-1.24125	0.0259	0.0845816	no
ENSG00000112486	0	0	1	1	no	0	0	1	1	no
ENSG00000112530	0.938185	0.704773	0.0309	0.0975175	no	2.01391	1.63551	5e-05	0.000394466	yes
ENSG00000112531	-0.24648	-0.914306	0.10775	0.255919	no	-0.151889	-0.756129	0.1817	0.373357	no
ENSG00000112539	-0.779626	0	1	1	no	-1.41863	0	1	1	no
ENSG00000112541	-0.221905	-1.9288	0.00125	0.0068727	yes	-0.571259	-4.70788	5e-05	0.000394466	yes
ENSG00000112584	0.276906	2.37877	5e-05	0.000394466	yes	0.238863	2.12349	0.0002	0.00139451	yes
ENSG00000112624	-0.0637716	-0.539996	0.34065	0.571236	no	-0.37552	-3.07546	5e-05	0.000394466	yes
ENSG00000112679	-0.0755338	-0.409036	0.4534	0.684998	no	-0.101424	-0.41741	0.4175	0.650529	no
ENSG00000112685	0.0486569	0.289202	0.5974	0.801012	no	0.114485	0.663334	0.2362	0.446344	no
ENSG00000112699	-0.10687	-0.600831	0.2869	0.509324	no	0.455327	2.76955	5e-05	0.000394466	yes
ENSG00000112701	-0.116324	-0.66638	0.2458	0.458231	no	-0.0755388	-0.429031	0.45225	0.683951	no
ENSG00000112715	0.414057	2.21944	5e-05	0.000394466	yes	0.340588	1.83469	0.0014	0.00756525	yes
ENSG00000112739	-0.0058607	-0.0276802	0.9614	0.981931	no	0.192917	0.919015	0.10175	0.245233	no
ENSG00000112787	-0.243281	-0.681532	0.2262	0.433452	no	0.272173	0.86405	0.12235	0.281166	no
ENSG00000112851	0.338183	1.77094	0.00025	0.00169574	yes	0.409206	2.00963	5e-05	0.000394466	yes
ENSG00000112877	0.270258	1.35907	0.01845	0.0643583	no	1.165	6.1552	5e-05	0.000394466	yes
ENSG00000112893	-0.248521	-1.25831	0.0268	0.0870179	no	-0.0422643	-0.192481	0.7217	0.880608	no
ENSG00000112941	-0.214878	-1.33228	0.01955	0.0674897	no	0.313131	1.7692	0.00215	0.0108713	yes
ENSG00000112964	-0.0344539	-0.252968	0.65415	0.839329	no	0.415393	3.06343	5e-05	0.000394466	yes
ENSG00000112977	0.00519117	0.0369221	0.94575	0.976767	no	-0.334224	-2.48638	5e-05	0.000394466	yes
ENSG00000113013	-0.175849	-1.13153	0.04615	0.133699	no	-0.223687	-1.45029	0.01055	0.0408995	yes
ENSG00000113048	-0.345113	-1.26808	0.03105	0.0979295	no	-0.154387	-0.570821	0.3216	0.549728	no
ENSG00000113068	0.142403	0.738161	0.18565	0.378692	no	0.339018	2.02824	0.0005	0.00312122	yes
ENSG00000113161	0.071367	0.379912	0.47715	0.706426	no	0.32753	1.82694	0.00085	0.00494128	yes
ENSG00000113163	0.343754	1.67907	0.0034	0.0160162	yes	0.184547	0.878445	0.1257	0.286747	no
ENSG00000113194	0.267176	1.64422	0.0029	0.0139832	yes	0.359201	2.20697	5e-05	0.000394466	yes
ENSG00000113240	0.305563	2.16635	5e-05	0.000394466	yes	0.101816	0.675818	0.2371	0.447404	no
ENSG00000113269	-0.144872	-1.08332	0.06025	0.164384	no	-0.162607	-1.2153	0.0336	0.104221	no
ENSG00000113296	0.207515	0.274622	0.595	0.799245	no	-0.101396	-0.135329	0.79505	0.916881	no
ENSG00000113300	-0.253852	-1.01296	0.07275	0.190088	no	0.0182868	0.0783781	0.886	0.953858	no
ENSG00000113319	0.424351	0	1	1	no	0.941422	0	1	1	no
ENSG00000113360	-0.0831844	-0.333637	0.5605	0.773579	no	0.187892	0.816663	0.143	0.315165	no
ENSG00000113368	-0.623771	-4.04676	5e-05	0.000394466	yes	-0.0781713	-0.495927	0.38355	0.616644	no
ENSG00000113369	0.329008	1.61815	0.00475	0.0211284	yes	0.884434	4.39421	5e-05	0.000394466	yes
ENSG00000113384	0.19902	1.66189	0.003	0.0143914	yes	-0.0101658	-0.0847682	0.8835	0.953038	no
ENSG00000113387	0.120712	0.856631	0.13625	0.30421	no	0.369635	2.62661	5e-05	0.000394466	yes
ENSG00000113391	0.145854	0.474749	0.39335	0.626705	no	-0.0549065	-0.193986	0.7274	0.883514	no
ENSG00000113448	-0.159729	-0.789879	0.1497	0.326064	no	0.825878	4.18793	5e-05	0.000394466	yes
ENSG00000113504	0.131357	0.63683	0.258	0.472999	no	0.197646	0.955909	0.09615	0.234823	no
ENSG00000113522	-0.225926	-1.27771	0.0225	0.0755406	no	-0.383133	-2.16406	0.0001	0.000748217	yes
ENSG00000113558	0.18559	1.12694	0.0508	0.143918	no	0.0417612	0.248654	0.66895	0.848742	no
ENSG00000113583	0.320917	2.4839	5e-05	0.000394466	yes	0.211255	1.61597	0.0049	0.0216772	yes
ENSG00000113594	-0.116021	-0.541525	0.2556	0.470139	no	-0.403233	-1.84903	0.0006	0.00365163	yes
ENSG00000113621	0.423821	2.32548	5e-05	0.000394466	yes	0.24809	1.38558	0.016	0.0573212	no
ENSG00000113638	0.309242	1.66216	0.0062	0.0263992	yes	0.162834	1.11597	0.0496	0.141256	no
ENSG00000113645	-0.192792	-1.0409	0.06095	0.165967	no	0.195806	1.16275	0.03785	0.114656	no
ENSG00000113648	0.214577	1.41484	0.0106	0.0410531	yes	0.491527	3.42831	5e-05	0.000394466	yes
ENSG00000113649	-0.198317	-1.0618	0.0642	0.172618	no	0.0506334	0.277382	0.6231	0.819208	no
ENSG00000113658	0.117409	0.490702	0.3823	0.615492	no	0.0690526	0.282367	0.6186	0.816276	no
ENSG00000113712	0.218278	1.27611	0.02485	0.0817552	no	0.187865	1.13694	0.04595	0.133315	no
ENSG00000113719	-0.147693	-1.12422	0.0352	0.108202	no	-0.162228	-1.23998	0.01715	0.060668	no
ENSG00000113734	0.0287949	0.255228	0.6593	0.842521	no	0.181554	1.63227	0.0056	0.0242585	yes
ENSG00000113758	0.00339826	0.0238501	0.96545	0.983073	no	0.161042	1.1269	0.04225	0.124736	no
ENSG00000113761	0.073086	0.383612	0.4998	0.72534	no	0.406516	2.28504	0.00015	0.00108114	yes
ENSG00000113810	-0.59548	-2.13192	0.0002	0.00139451	yes	-0.157617	-0.609981	0.27515	0.494825	no
ENSG00000113838	0.053998	0.185444	0.7294	0.884353	no	0.220601	0.787899	0.13875	0.308288	no
ENSG00000113845	-0.150173	-1.13609	0.0475	0.136581	no	-0.103184	-0.78706	0.17205	0.359639	no
ENSG00000113916	0.0827402	0.552868	0.3275	0.55643	no	0.327154	2.076	0.0002	0.00139451	yes
ENSG00000113924	0.120184	0.372456	0.49075	0.71783	no	1.16563	4.03306	5e-05	0.000394466	yes
ENSG00000113966	-0.29111	-1.2873	0.03045	0.0963499	no	-0.0524369	-0.319065	0.57825	0.786204	no
ENSG00000114021	0.0170138	0.1219	0.8285	0.931331	no	-0.678537	-4.80518	5e-05	0.000394466	yes
ENSG00000114030	0.138019	0.640256	0.26375	0.480297	no	0.280692	1.37237	0.0166	0.0590543	no
ENSG00000114054	0.00469603	0.0353872	0.9496	0.978214	no	-0.0683298	-0.517454	0.3676	0.59974	no
ENSG00000114062	0.158763	1.19511	0.03675	0.111966	no	0.333961	2.52781	5e-05	0.000394466	yes
ENSG00000114098	-0.290173	-1.48643	0.0077	0.0315631	yes	0.186199	1.00269	0.0754	0.195372	no
ENSG00000114107	-0.0512896	-0.336001	0.5563	0.770374	no	0.199327	1.32147	0.0213	0.0722962	no
ENSG00000114120	-0.491023	-2.5798	5e-05	0.000394466	yes	-0.783685	-4.01169	5e-05	0.000394466	yes
ENSG00000114126	-0.0232576	-0.10588	0.85255	0.941248	no	0.0945297	0.374671	0.50085	0.726141	no
ENSG00000114127	0.240956	0.909404	0.0852	0.214474	no	-0.246453	-0.946412	0.0782	0.200693	no
ENSG00000114166	0.503271	1.99723	0.00045	0.00285055	yes	0.203333	0.824564	0.1456	0.319344	no
ENSG00000114200	0.00441489	0.0326444	0.9539	0.979524	no	0.77112	5.68989	5e-05	0.000394466	yes
ENSG00000114209	-0.0495771	-0.346709	0.53865	0.756333	no	0.232172	1.72586	0.00215	0.0108713	yes
ENSG00000114268	0.314928	2.03349	0.00015	0.00108114	yes	0.65558	4.33876	5e-05	0.000394466	yes
ENSG00000114302	0.212722	1.08901	0.053	0.148856	no	0.436989	2.09987	0.0002	0.00139451	yes
ENSG00000114316	0.0231324	0.113384	0.8406	0.936605	no	0.141803	0.701669	0.21975	0.425034	no
ENSG00000114331	-0.13938	-0.592111	0.2525	0.466498	no	0.141467	0.563677	0.27755	0.4978	no
ENSG00000114346	-0.509176	-3.28426	5e-05	0.000394466	yes	-0.23082	-1.51516	0.00705	0.0293726	yes
ENSG00000114353	0.0753365	0.554899	0.32895	0.55802	no	0.141196	1.04052	0.06525	0.174822	no
ENSG00000114354	0.253108	2.04182	0.0005	0.00312122	yes	0.272963	2.20455	5e-05	0.000394466	yes
ENSG00000114374	-0.145184	-0.774031	0.1679	0.353526	no	-0.30226	-1.54626	0.00685	0.028723	yes
ENSG00000114416	0.057774	0.33514	0.549	0.764489	no	0.12553	0.739829	0.1858	0.378914	no
ENSG00000114423	-0.0758438	-0.257888	0.6427	0.832409	no	-0.0895365	-0.306653	0.5854	0.791572	no
ENSG00000114439	0.0425237	0.155995	0.74645	0.893388	no	-0.0764787	-0.269403	0.59185	0.796366	no
ENSG00000114480	0.0951277	0.6791	0.2307	0.439052	no	-0.156728	-1.10582	0.0522	0.147072	no
ENSG00000114544	-0.262096	-1.84184	0.0017	0.00891245	yes	-0.615629	-4.25912	5e-05	0.000394466	yes
ENSG00000114554	-0.023938	-0.0827206	0.8437	0.937909	no	0.502217	2.17305	0.0002	0.00139451	yes
ENSG00000114573	0.376713	2.4068	5e-05	0.000394466	yes	0.581818	3.72858	5e-05	0.000394466	yes
ENSG00000114626	0.690746	2.41695	5e-05	0.000394466	yes	0.0334373	0.100592	0.8335	0.93337	no
ENSG00000114631	-0.0281763	-0.239132	0.676	0.852803	no	-0.205825	-1.74489	0.0025	0.0123557	yes
ENSG00000114646	-0.130082	-1.04346	0.0685	0.181527	no	-0.029754	-0.24123	0.6772	0.853617	no
ENSG00000114650	-0.130708	-0.639066	0.2683	0.485978	no	0.0329286	0.162289	0.77925	0.909224	no
ENSG00000114654	-0.116997	-0.207728	0.71695	0.87814	no	-0.8815	-1.27978	0.0377	0.114276	no
ENSG00000114656	-0.389305	-0.823934	0.14975	0.326122	no	-0.394198	-0.794143	0.16575	0.350398	no
ENSG00000114670	0.582319	0.485041	0.27075	0.489232	no	1.07242	0.99351	0.03765	0.114175	no
ENSG00000114686	-0.14642	-1.20716	0.0359	0.109878	no	0.0270509	0.223406	0.70055	0.868482	no
ENSG00000114742	0.103959	0.322834	0.58105	0.788308	no	-0.115777	-0.373068	0.51265	0.736367	no
ENSG00000114745	0.0107514	0.0368187	0.94585	0.976767	no	-0.039619	-0.134285	0.8118	0.924074	no
ENSG00000114767	-0.106382	-0.875702	0.12355	0.283219	no	0.0559688	0.449538	0.42705	0.659693	no
ENSG00000114784	0.0476252	0.404997	0.47715	0.706426	no	0.0388196	0.329846	0.56495	0.7762	no
ENSG00000114790	0.126548	1.0663	0.0637	0.171632	no	0.260999	2.20373	0.00015	0.00108114	yes
ENSG00000114796	0.243044	1.11996	0.04235	0.124998	no	-0.609134	-2.69539	5e-05	0.000394466	yes
ENSG00000114805	-0.305138	-2.12804	0.0001	0.000748217	yes	-0.160089	-0.94945	0.092	0.227486	no
ENSG00000114850	-0.0701744	-0.400244	0.482	0.710511	no	-0.023206	-0.135684	0.8096	0.922936	no
ENSG00000114857	-0.100698	-0.378506	0.4661	0.696904	no	-0.136548	-0.503241	0.3275	0.55643	no
ENSG00000114861	-0.0865752	-0.330188	0.5485	0.763947	no	-0.295957	-1.13901	0.0477	0.137057	no
ENSG00000114867	0.0634646	0.259076	0.55365	0.768164	no	0.296552	1.21532	0.006	0.0256898	yes
ENSG00000114933	0.16831	0.699933	0.2192	0.424311	no	-0.118673	-0.511309	0.36185	0.594087	no
ENSG00000114956	-0.250871	-2.24735	0.0001	0.000748217	yes	-0.227352	-2.01584	0.0004	0.00256373	yes
ENSG00000114982	-0.0618312	-0.345847	0.5286	0.748599	no	-0.0924724	-0.505728	0.3496	0.58081	no
ENSG00000114988	0.0242751	0.167632	0.76185	0.901228	no	0.361048	2.65907	5e-05	0.000394466	yes
ENSG00000115020	0.0902628	0.504345	0.3634	0.59552	no	0.20304	1.14121	0.0438	0.128389	no
ENSG00000115041	0.0468678	0.279719	0.62095	0.818001	no	-0.237944	-1.42659	0.0134	0.0496941	yes
ENSG00000115053	-0.107563	-0.609282	0.28705	0.509443	no	0.26241	1.48974	0.00955	0.0377414	yes
ENSG00000115073	0.0936829	0.740581	0.1941	0.390265	no	-0.241849	-1.87585	0.00095	0.00542971	yes
ENSG00000115091	0.210175	1.27491	0.0248	0.0816198	no	0.34924	2.16665	0.0001	0.000748217	yes
ENSG00000115109	0.25853	1.68021	0.00325	0.0154039	yes	0.106214	0.668642	0.2398	0.450871	no
ENSG00000115159	-0.990528	-5.29232	5e-05	0.000394466	yes	-0.433527	-2.31138	0.0001	0.000748217	yes
ENSG00000115170	0.317404	1.35565	0.0076	0.0312318	yes	-0.0704329	-0.264561	0.58615	0.791909	no
ENSG00000115183	0.662807	5.21988	5e-05	0.000394466	yes	0.0907703	0.705843	0.2219	0.427877	no
ENSG00000115207	-0.0482719	-0.223937	0.67605	0.852827	no	0.148166	0.697427	0.19305	0.388746	no
ENSG00000115233	0.093717	0.721104	0.2086	0.410215	no	0.0434041	0.343969	0.54615	0.761938	no
ENSG00000115239	0.144207	0.39501	0.47605	0.70559	no	0.168429	0.464397	0.4042	0.637101	no
ENSG00000115241	-0.0982704	-0.83028	0.1437	0.316279	no	0.201738	1.69664	0.0031	0.0147981	yes
ENSG00000115268	0.108664	0.911837	0.10785	0.256069	no	0.142958	1.2021	0.03855	0.116312	no
ENSG00000115271	0.0100942	0.055161	0.9174	0.966929	no	0.15238	1.07622	0.0579	0.159417	no
ENSG00000115286	0.00413886	0.0316347	0.95345	0.979411	no	-0.00593406	-0.044765	0.93715	0.973596	no
ENSG00000115310	0.188831	1.46832	0.0098	0.0385095	yes	-0.273107	-2.03921	0.00015	0.00108114	yes
ENSG00000115350	-0.421998	-3.23304	5e-05	0.000394466	yes	-0.361246	-2.84627	5e-05	0.000394466	yes
ENSG00000115364	-0.531684	-2.70149	5e-05	0.000394466	yes	0.11927	0.627786	0.2673	0.484833	no
ENSG00000115365	-0.0674245	-0.451391	0.42155	0.654501	no	-0.326188	-2.12649	5e-05	0.000394466	yes
ENSG00000115368	-0.0440287	-0.312297	0.58685	0.792372	no	0.325418	2.35818	0.00015	0.00108114	yes
ENSG00000115392	0.0237174	0.111903	0.8442	0.938123	no	0.0399011	0.17501	0.75745	0.898977	no
ENSG00000115419	0.0153179	0.0528054	0.92375	0.969601	no	0.177605	0.627547	0.2633	0.479714	no
ENSG00000115446	0.212584	1.69944	0.0037	0.0171896	yes	-0.0722432	-0.617664	0.27915	0.499585	no
ENSG00000115459	0.0450739	0.114166	0.8435	0.9378	no	0.172522	0.468457	0.42765	0.660233	no
ENSG00000115464	0.0681119	0.172255	0.64935	0.83662	no	-0.0551867	-0.142768	0.71055	0.874595	no
ENSG00000115468	0.494633	0	1	1	no	-0.0518997	0	1	1	no
ENSG00000115474	3.10222	0.488804	0.0116	0.0442271	yes	2.89632	0	1	1	no
ENSG00000115504	0.112156	0.606227	0.2689	0.486762	no	0.13818	0.713481	0.19595	0.393	no
ENSG00000115514	-0.153653	-0.391453	0.48175	0.710331	no	-0.0458722	-0.117345	0.83525	0.934141	no
ENSG00000115526	0.00374114	0.0247999	0.96435	0.982814	no	0.139892	0.895093	0.1111	0.261732	no
ENSG00000115540	0.220547	0.294368	0.59925	0.802211	no	0.29086	0.368377	0.51625	0.739008	no
ENSG00000115548	0.40425	1.52396	0.007	0.029217	yes	0.246882	1.02369	0.0706	0.18575	no
ENSG00000115561	-0.0600537	-0.159338	0.78155	0.91043	no	-0.518132	-1.29465	0.02435	0.080464	no
ENSG00000115616	0.0303259	0.152537	0.7757	0.907797	no	-0.304076	-1.45271	0.0135	0.0499847	yes
ENSG00000115648	-0.0323057	-0.212783	0.71	0.87419	no	-0.138671	-0.92054	0.1069	0.254457	no
ENSG00000115652	0.143219	0.935703	0.093	0.22911	no	0.562215	3.72988	5e-05	0.000394466	yes
ENSG00000115677	0.0646506	0.313759	0.48895	0.716351	no	0.1875	0.871769	0.06695	0.178367	no
ENSG00000115687	-0.664391	-2.90426	5e-05	0.000394466	yes	-0.396924	-1.78469	0.0016	0.00848051	yes
ENSG00000115694	-0.224725	-1.03463	0.068	0.180487	no	0.177122	0.836774	0.13945	0.309496	no
ENSG00000115750	-0.177076	-0.820036	0.1444	0.317416	no	-0.0471837	-0.238423	0.6569	0.841026	no
ENSG00000115756	-0.66485	-4.54091	5e-05	0.000394466	yes	-0.132982	-0.968327	0.0926	0.228419	no
ENSG00000115758	-0.230755	-1.83861	0.0012	0.00663203	yes	0.0176721	0.138856	0.8114	0.923904	no
ENSG00000115760	0.249239	0.625395	0.2234	0.429812	no	0.245554	0.627313	0.2406	0.451777	no
ENSG00000115761	0.199667	1.43388	0.01135	0.0434594	yes	0.404526	2.9503	5e-05	0.000394466	yes
ENSG00000115762	0.106833	0.793297	0.15805	0.338789	no	0.255962	1.84433	0.0012	0.00663203	yes
ENSG00000115806	0.0748264	0.461845	0.42105	0.653963	no	0.33182	1.98361	0.00045	0.00285055	yes
ENSG00000115827	0.494097	1.54472	0.00695	0.0290653	yes	0.375521	1.11292	0.05375	0.15049	no
ENSG00000115839	-0.0598249	-0.386455	0.48775	0.715237	no	-0.0629666	-0.403195	0.465	0.695898	no
ENSG00000115840	0.0272268	0.0798367	0.8703	0.948553	no	0.439756	1.32259	0.00945	0.037437	yes
ENSG00000115866	0.0502838	0.378294	0.50395	0.728967	no	-0.212269	-1.65234	0.00325	0.0154039	yes
ENSG00000115875	-0.13111	-0.990735	0.08605	0.216122	no	0.238649	1.81688	0.00155	0.00824944	yes
ENSG00000115904	-0.380642	-1.04427	0.05885	0.161455	no	-0.489105	-1.23027	0.0245	0.0808728	no
ENSG00000115935	0.223289	0	1	1	no	0.87762	0	1	1	no
ENSG00000115944	-0.0208353	-0.172179	0.76185	0.901228	no	-0.00341539	-0.0282837	0.9576	0.980753	no
ENSG00000115947	0.45629	2.07254	0.0002	0.00139451	yes	0.298859	1.41304	0.0141	0.0517667	no
ENSG00000115963	-0.605093	-3.29259	5e-05	0.000394466	yes	-1.27028	-6.70679	5e-05	0.000394466	yes
ENSG00000115970	0.0839572	0.372711	0.4815	0.710114	no	-0.211129	-0.904153	0.0844	0.212915	no
ENSG00000115977	0.641249	1.0547	0.07165	0.187968	no	0.574541	0.945428	0.1043	0.249663	no
ENSG00000115993	-0.361614	-2.10969	0.00015	0.00108114	yes	-0.139109	-0.802939	0.14225	0.313911	no
ENSG00000116001	-0.10051	-0.477112	0.3976	0.630628	no	-0.327673	-1.55339	0.007	0.029217	yes
ENSG00000116005	0.402364	2.79833	5e-05	0.000394466	yes	0.475953	3.29586	5e-05	0.000394466	yes
ENSG00000116044	-0.224066	-1.14283	0.04135	0.122648	no	-0.418103	-2.19201	0.00015	0.00108114	yes
ENSG00000116117	-0.24918	-0.926945	0.10105	0.243982	no	-0.40683	-1.51137	0.0065	0.0275095	yes
ENSG00000116120	0.00277503	0.0224488	0.9699	0.984891	no	0.0752832	0.610115	0.28595	0.508142	no
ENSG00000116127	-0.296712	-0.987552	0.0214	0.0725734	no	-0.364522	-1.22046	0.00785	0.0320641	yes
ENSG00000116128	0.117194	0.392008	0.48905	0.716441	no	0.0347791	0.116492	0.8342	0.933607	no
ENSG00000116133	0.054259	0.454788	0.42465	0.657397	no	0.105396	0.881743	0.11505	0.268672	no
ENSG00000116141	0.136168	0.297851	0.599	0.802109	no	0.550716	1.28918	0.022	0.0742445	no
ENSG00000116151	0.114078	0.52784	0.35175	0.583105	no	0.0159492	0.0717775	0.8973	0.95809	no
ENSG00000116171	0.229453	1.70709	0.0025	0.0123557	yes	-0.0508965	-0.376892	0.51245	0.736194	no
ENSG00000116191	-0.234227	-0.866458	0.12875	0.292069	no	-0.184372	-0.700131	0.21405	0.417435	no
ENSG00000116198	0.325057	1.17988	0.0428	0.125991	no	0.270334	1.03305	0.06825	0.181029	no
ENSG00000116199	-0.236411	-1.84604	0.00195	0.0100062	yes	-0.288686	-2.26667	5e-05	0.000394466	yes
ENSG00000116213	-0.197526	-0.925455	0.1027	0.246932	no	0.093692	0.438471	0.4389	0.671499	no
ENSG00000116221	-0.0696965	-0.495543	0.3865	0.61966	no	0.0600012	0.430087	0.44695	0.67933	no
ENSG00000116251	-0.0416964	-0.202149	0.72295	0.881298	no	0.253715	1.24368	0.0309	0.0975175	no
ENSG00000116254	-0.0428541	-0.0404233	0.9337	0.972739	no	0.344545	0.34807	0.47785	0.706989	no
ENSG00000116260	-0.167468	-1.04649	0.0722	0.189044	no	-0.659414	-4.12488	5e-05	0.000394466	yes
ENSG00000116266	0.317643	2.00843	0.0006	0.00365163	yes	-0.192663	-1.29703	0.0209	0.0712398	no
ENSG00000116285	0.269745	2.19455	0.00035	0.00228343	yes	0.515729	4.25504	5e-05	0.000394466	yes
ENSG00000116288	0.235793	1.93745	0.00095	0.00542971	yes	0.0298299	0.245777	0.6701	0.849307	no
ENSG00000116337	0.0126641	0.0611622	0.91375	0.965565	no	0.112738	0.59035	0.305	0.530622	no
ENSG00000116350	0.000985465	0.00388378	0.9943	0.996351	no	0.0315979	0.119884	0.81745	0.926678	no
ENSG00000116353	-0.405113	-3.13952	5e-05	0.000394466	yes	-0.524605	-4.13246	5e-05	0.000394466	yes
ENSG00000116406	0.165659	0.92833	0.09765	0.237637	no	0.104638	0.598246	0.27155	0.490245	no
ENSG00000116459	0.214333	1.56001	0.00635	0.0269509	yes	0.241126	1.72759	0.0025	0.0123557	yes
ENSG00000116473	0.228579	0.955886	0.1017	0.245156	no	0.230003	0.93793	0.1077	0.255833	no
ENSG00000116478	0.16321	1.32934	0.0202	0.0693317	no	0.176959	1.44438	0.0107	0.041397	yes
ENSG00000116539	0.097033	0.426198	0.3741	0.606913	no	0.186462	0.806491	0.0907	0.224995	no
ENSG00000116560	0.00922859	0.0559796	0.9213	0.968367	no	0.269783	1.65826	0.00255	0.0125635	yes
ENSG00000116580	-0.084366	-0.180226	0.70035	0.868409	no	0.131285	0.276676	0.58105	0.788308	no
ENSG00000116584	-0.104732	-0.514429	0.35965	0.591791	no	-0.360349	-1.72049	0.0033	0.0156062	yes
ENSG00000116604	0.260389	1.02867	0.072	0.188672	no	0.316185	1.24134	0.0295	0.0939181	no
ENSG00000116641	-0.221993	-1.30488	0.0204	0.069858	no	-0.140411	-0.873743	0.1015	0.244801	no
ENSG00000116663	0.0978352	0.292351	0.5853	0.791475	no	-0.16743	-0.438238	0.4134	0.646419	no
ENSG00000116667	0.260546	1.14021	0.04545	0.132231	no	0.12405	0.569078	0.31735	0.544614	no
ENSG00000116668	-0.206043	-0.775901	0.1608	0.343077	no	-0.466982	-2.37215	0.0001	0.000748217	yes
ENSG00000116679	-0.831812	-5.34649	5e-05	0.000394466	yes	-0.445799	-2.91206	5e-05	0.000394466	yes
ENSG00000116685	-0.00915017	-0.0749866	0.8923	0.956439	no	0.070316	0.577876	0.3192	0.54684	no
ENSG00000116688	-0.0736854	-0.420735	0.4393	0.671833	no	0.158858	0.907576	0.0999	0.241933	no
ENSG00000116691	-0.0163133	-0.1446	0.79805	0.918332	no	0.344845	3.06791	5e-05	0.000394466	yes
ENSG00000116698	-0.0212934	-0.0821271	0.8823	0.952764	no	0.181681	0.74478	0.1801	0.371116	no
ENSG00000116731	-0.0121597	-0.0437886	0.9317	0.972488	no	0.280976	1.19762	0.0355	0.108895	no
ENSG00000116750	-0.402689	-1.36748	0.01655	0.0589143	no	0.108407	0.413803	0.45835	0.689786	no
ENSG00000116754	0.0224724	0.135054	0.81215	0.924188	no	0.157791	0.953286	0.0967	0.235916	no
ENSG00000116791	-0.0995584	-0.376642	0.48915	0.716512	no	0.216275	0.837333	0.1376	0.306446	no
ENSG00000116793	0.174922	0.358092	0.4881	0.715636	no	0.635285	1.33306	0.0108	0.0417314	yes
ENSG00000116809	-0.250618	-1.38794	0.01425	0.052217	no	-0.0954297	-0.538179	0.3396	0.569993	no
ENSG00000116857	-0.00808354	-0.0643977	0.91035	0.963898	no	-0.144166	-1.14645	0.0469	0.135292	no
ENSG00000116871	0.0644852	0.396683	0.4803	0.709194	no	0.210527	1.27122	0.0267	0.0867797	no
ENSG00000116874	-0.162671	-0.931373	0.1071	0.254812	no	-0.0865213	-0.502686	0.3805	0.613566	no
ENSG00000116954	0.113667	0.910792	0.10905	0.258132	no	-0.0831367	-0.663438	0.2407	0.451826	no
ENSG00000116957	0.542175	4.39641	5e-05	0.000394466	yes	0.728036	5.88098	5e-05	0.000394466	yes
ENSG00000116977	0.679383	2.72279	5e-05	0.000394466	yes	-0.250371	-0.916209	0.0842	0.212526	no
ENSG00000116984	-0.285512	-1.87075	0.00095	0.00542971	yes	-0.0748205	-0.480785	0.40125	0.634166	no
ENSG00000116991	0.395819	2.25349	5e-05	0.000394466	yes	0.604255	3.44891	5e-05	0.000394466	yes
ENSG00000117000	0.442161	3.69323	5e-05	0.000394466	yes	0.503172	4.20574	5e-05	0.000394466	yes
ENSG00000117054	0.265201	1.36536	0.01575	0.056616	no	0.26658	1.36347	0.01565	0.0563369	no
ENSG00000117139	0.137002	0.77123	0.1431	0.315285	no	0.378352	2.11546	0.0002	0.00139451	yes
ENSG00000117143	0.0828545	0.272897	0.321	0.549024	no	0.291009	0.850977	0.01155	0.0440729	yes
ENSG00000117153	-0.44657	-3.66328	5e-05	0.000394466	yes	-0.140458	-1.15086	0.04485	0.130788	no
ENSG00000117155	-0.143288	-1.00545	0.0769	0.198275	no	-0.0831704	-0.589755	0.29705	0.521112	no
ENSG00000117222	0.0352424	0.277615	0.6214	0.818255	no	0.0749807	0.579974	0.2974	0.521545	no
ENSG00000117262	-0.281669	-1.1692	0.03635	0.111004	no	-0.249864	-1.15662	0.04185	0.123787	no
ENSG00000117266	0.369301	1.87611	0.00065	0.00390953	yes	0.380343	1.86404	0.0005	0.00312122	yes
ENSG00000117335	0.241019	1.19075	0.0371	0.112809	no	0.119174	0.60633	0.28635	0.508609	no
ENSG00000117411	-0.124904	-0.958617	0.0939	0.230793	no	0.201545	1.5826	0.00565	0.0244483	yes
ENSG00000117419	-0.325633	-2.43594	5e-05	0.000394466	yes	-0.640919	-4.7414	5e-05	0.000394466	yes
ENSG00000117448	-0.304584	-2.23388	0.00015	0.00108114	yes	-0.318656	-2.36195	5e-05	0.000394466	yes
ENSG00000117450	-0.0519976	-0.430356	0.4499	0.681924	no	0.435491	3.61085	5e-05	0.000394466	yes
ENSG00000117461	0.277373	1.62181	0.00475	0.0211284	yes	0.694146	4.09008	5e-05	0.000394466	yes
ENSG00000117479	-0.218437	-1.83777	0.00125	0.0068727	yes	-0.535227	-4.47362	5e-05	0.000394466	yes
ENSG00000117480	0.453286	3.17788	5e-05	0.000394466	yes	-0.0858311	-0.603688	0.2878	0.510202	no
ENSG00000117500	0.272049	1.16465	0.04385	0.128501	no	0.117276	0.500996	0.38165	0.614821	no
ENSG00000117523	-0.0887638	-0.310182	0.5507	0.765656	no	-0.0764837	-0.27034	0.61655	0.814813	no
ENSG00000117528	0.085399	0.658685	0.25005	0.463394	no	0.100732	0.775881	0.17165	0.358993	no
ENSG00000117543	-0.554408	-3.95172	5e-05	0.000394466	yes	-0.244004	-1.74541	0.00255	0.0125635	yes
ENSG00000117569	-0.122652	-0.670233	0.2468	0.45957	no	-0.0267499	-0.152857	0.79035	0.914564	no
ENSG00000117592	0.0885429	0.70086	0.21855	0.423422	no	0.136805	1.09036	0.05975	0.163398	no
ENSG00000117597	0.103437	0.761769	0.18075	0.372054	no	0.0408752	0.305977	0.5986	0.801786	no
ENSG00000117620	-0.402305	-2.40078	5e-05	0.000394466	yes	-0.785101	-5.04453	5e-05	0.000394466	yes
ENSG00000117625	0.177684	0.783022	0.17625	0.365713	no	-0.0718283	-0.343464	0.5457	0.761713	no
ENSG00000117640	0.0111637	0.0617745	0.91655	0.966603	no	-0.0908866	-0.477972	0.4042	0.637101	no
ENSG00000117676	-0.0322114	-0.211233	0.6925	0.863839	no	0.0578137	0.382765	0.48345	0.711569	no
ENSG00000117697	-0.109211	-0.760767	0.1861	0.37933	no	-0.151779	-1.07715	0.0652	0.174713	no
ENSG00000117713	0.0217963	0.0925575	0.8729	0.949519	no	0.0963683	0.386695	0.49315	0.719893	no
ENSG00000117724	-0.795468	-5.23449	5e-05	0.000394466	yes	-0.691512	-4.74971	5e-05	0.000394466	yes
ENSG00000117791	-0.109433	-0.581961	0.30415	0.529592	no	-0.258885	-1.29698	0.02255	0.0756901	no
ENSG00000117834	0	0	1	1	no	0	0	1	1	no
ENSG00000117859	0.485091	1.76176	0.00135	0.00733226	yes	0.122761	0.439269	0.41315	0.646187	no
ENSG00000117868	-0.500138	-3.94089	5e-05	0.000394466	yes	-0.764342	-5.66023	5e-05	0.000394466	yes
ENSG00000117877	-0.424924	-1.58755	0.0062	0.0263992	yes	-0.0740524	-0.290025	0.6072	0.808243	no
ENSG00000117899	0.139506	1.0765	0.0602	0.164288	no	0.257322	1.9984	0.00035	0.00228343	yes
ENSG00000118007	-0.341749	-0.981619	0.06675	0.177911	no	-0.378726	-1.09219	0.04135	0.122648	no
ENSG00000118046	-0.150595	-0.820215	0.15065	0.327464	no	0.050832	0.279726	0.6265	0.821377	no
ENSG00000118058	-0.129737	-0.208624	0.5684	0.778969	no	0.0100274	0.0173732	0.9639	0.982781	no
ENSG00000118197	0.0586661	0.427121	0.4489	0.680893	no	-0.218139	-1.59802	0.00455	0.0203746	yes
ENSG00000118200	0.0763822	0.505481	0.31475	0.541882	no	0.368702	2.45722	5e-05	0.000394466	yes
ENSG00000118217	0.0148274	0.091608	0.86625	0.946655	no	-0.277366	-1.88849	0.0009	0.00518136	yes
ENSG00000118242	-0.198147	-0.71332	0.2063	0.407225	no	0.52515	2.32779	0.00035	0.00228343	yes
ENSG00000118260	0.174776	0.698654	0.2232	0.429531	no	0.239554	0.915948	0.1159	0.270008	no
ENSG00000118276	-0.251528	-0.889316	0.11005	0.259855	no	0.0667362	0.189345	0.7159	0.877455	no
ENSG00000118412	-0.348451	-2.22177	0.0002	0.00139451	yes	-0.119786	-0.783832	0.1718	0.359225	no
ENSG00000118420	0.0252803	0.0712927	0.88705	0.954562	no	0.177394	0.463391	0.3269	0.5557	no
ENSG00000118482	0.018574	0.111628	0.83485	0.933976	no	0.068281	0.419538	0.43595	0.668815	no
ENSG00000118491	-1.10878	0	1	1	no	-2.23094	0	1	1	no
ENSG00000118507	-0.523392	-2.80851	5e-05	0.000394466	yes	-1.01439	-4.59324	5e-05	0.000394466	yes
ENSG00000118518	-0.307901	-2.36758	5e-05	0.000394466	yes	-0.78574	-5.55107	5e-05	0.000394466	yes
ENSG00000118564	-0.247593	-1.44029	0.0111	0.042697	yes	0.0978042	0.576481	0.29825	0.522506	no
ENSG00000118620	-0.264777	-1.42883	0.01215	0.0459257	yes	0.0198679	0.10553	0.84605	0.938843	no
ENSG00000118680	0.122052	1.02455	0.07635	0.197169	no	0.0974563	0.821928	0.1504	0.327113	no
ENSG00000118689	-0.209759	-1.73736	0.0024	0.0119296	yes	0.152045	1.27043	0.0271	0.0878169	no
ENSG00000118690	-0.458123	-1.61969	0.0042	0.0190507	yes	-0.139527	-0.562464	0.32095	0.548989	no
ENSG00000118702	0	0	1	1	no	0	0	1	1	no
ENSG00000118705	0.159968	1.28901	0.0202	0.0693317	no	0.183401	1.46171	0.00765	0.0313907	yes
ENSG00000118707	-0.310003	-1.04641	0.06125	0.166571	no	0.188007	0.642221	0.2493	0.46253	no
ENSG00000118762	-0.357528	-1.61747	0.01065	0.0412295	yes	-0.310505	-1.37891	0.0243	0.0803227	no
ENSG00000118804	1.38993	5.38093	5e-05	0.000394466	yes	1.02554	3.9007	5e-05	0.000394466	yes
ENSG00000118816	0.132806	0.947776	0.0863	0.216593	no	0.139556	0.96257	0.08315	0.210528	no
ENSG00000118855	0.324003	2.35836	5e-05	0.000394466	yes	0.087551	0.628978	0.271	0.489492	no
ENSG00000118900	-0.152743	-0.639118	0.2286	0.436541	no	0.463507	1.95806	0.0005	0.00312122	yes
ENSG00000118939	-0.258084	-1.82494	0.0013	0.00709758	yes	0.153472	1.10835	0.0508	0.143918	no
ENSG00000118961	0.115502	0.589501	0.2924	0.515634	no	-0.221385	-1.38801	0.018	0.0630467	no
ENSG00000119121	-0.496186	0	1	1	no	1.34409	0	1	1	no
ENSG00000119138	0.17337	1.45301	0.0106	0.0410531	yes	-0.0519415	-0.43439	0.44615	0.678468	no
ENSG00000119139	0.0114903	0.0589071	0.91825	0.967183	no	0.253094	1.27934	0.02575	0.0841712	no
ENSG00000119185	0.196511	0.719128	0.20965	0.411593	no	0.17245	0.716071	0.2085	0.410091	no
ENSG00000119318	0.178664	1.29462	0.0242	0.0800878	no	0.181851	1.31857	0.02055	0.0702327	no
ENSG00000119326	0.325505	2.41382	5e-05	0.000394466	yes	0.400296	2.96708	5e-05	0.000394466	yes
ENSG00000119333	-0.273669	-1.02243	0.0783	0.200903	no	-0.222409	-0.873296	0.12555	0.286476	no
ENSG00000119335	0.0275627	0.195746	0.7214	0.880416	no	0.239635	1.71467	0.00175	0.0091262	yes
ENSG00000119383	0.0617677	0.413897	0.4599	0.691198	no	-0.336427	-2.28818	0.0001	0.000748217	yes
ENSG00000119402	0.0387526	0.203416	0.7238	0.881597	no	-0.107819	-0.585887	0.3107	0.537147	no
ENSG00000119408	0.0791285	0.438457	0.44015	0.67265	no	0.296981	1.71556	0.00275	0.0133764	yes
ENSG00000119414	0.216937	1.25318	0.0272	0.0880791	no	0.215097	1.23827	0.0297	0.0944516	no
ENSG00000119487	-0.031001	-0.226036	0.6921	0.863535	no	0.129334	0.929698	0.1037	0.248613	no
ENSG00000119509	-0.13025	-0.922466	0.1047	0.250242	no	-0.11409	-0.780167	0.1688	0.354747	no
ENSG00000119522	-0.404621	-3.08903	5e-05	0.000394466	yes	-0.1702	-1.20462	0.03175	0.0996831	no
ENSG00000119523	0.0745124	0.567977	0.32545	0.554136	no	0.446913	3.43008	5e-05	0.000394466	yes
ENSG00000119596	-0.0663909	-0.23313	0.68685	0.859909	no	-0.0880244	-0.335429	0.55235	0.767033	no
ENSG00000119638	0.0911298	0.234855	0.60775	0.808633	no	-0.0725987	-0.198158	0.6733	0.850928	no
ENSG00000119650	-0.0466928	-0.174135	0.76	0.900171	no	-0.176451	-0.617826	0.27785	0.498112	no
ENSG00000119669	0.267459	2.26768	0.0002	0.00139451	yes	0.0422549	0.357725	0.53055	0.750114	no
ENSG00000119682	-0.542036	-2.90797	5e-05	0.000394466	yes	0.194111	1.08921	0.0436	0.127884	no
ENSG00000119684	-0.13567	-0.772447	0.17645	0.366046	no	0.0844306	0.47106	0.4119	0.644797	no
ENSG00000119685	-0.0545727	-0.150759	0.7873	0.913269	no	0.035727	0.0951048	0.8624	0.945132	no
ENSG00000119686	0.511618	0.679286	0.12255	0.281521	no	0.919819	1.32626	0.00195	0.0100062	yes
ENSG00000119689	0.0711073	0.51599	0.3628	0.594906	no	0.222818	1.58838	0.00555	0.0240664	yes
ENSG00000119699	0.60645	0.510356	0.31775	0.545081	no	0.891509	0.784278	0.11775	0.273306	no
ENSG00000119705	-0.0513579	-0.281758	0.62485	0.820166	no	0.10964	0.61374	0.2887	0.511356	no
ENSG00000119707	-0.0758199	-0.480652	0.38725	0.620485	no	0.0287549	0.184005	0.74	0.890267	no
ENSG00000119718	0.216611	1.85879	0.00145	0.00779664	yes	0.242002	2.08778	0.00065	0.00390953	yes
ENSG00000119725	0.0902816	0.253913	0.6363	0.828051	no	0.0992134	0.293476	0.57915	0.786964	no
ENSG00000119729	-0.121908	-0.534794	0.3145	0.541603	no	-0.0152409	-0.0626487	0.90765	0.962719	no
ENSG00000119771	-0.321889	-2.3351	5e-05	0.000394466	yes	-0.432236	-3.07698	5e-05	0.000394466	yes
ENSG00000119772	0.282627	1.97784	0.0004	0.00256373	yes	0.0986228	0.655701	0.24315	0.455022	no
ENSG00000119778	-0.160219	-0.61709	0.2806	0.501419	no	-0.0800858	-0.329126	0.55505	0.769355	no
ENSG00000119787	-0.0296755	-0.175334	0.7608	0.90058	no	-0.13421	-0.784092	0.1699	0.356356	no
ENSG00000119844	0.23242	1.8277	0.00135	0.00733226	yes	0.233233	1.79812	0.0012	0.00663203	yes
ENSG00000119912	-0.0308672	-0.156918	0.7836	0.911591	no	0.226836	1.20197	0.0327	0.101943	no
ENSG00000120029	0.234884	1.14577	0.04385	0.128501	no	0.288639	1.45608	0.0141	0.0517667	no
ENSG00000120049	-0.632102	-0.621428	0.1157	0.269678	no	-0.204107	-0.208431	0.6069	0.808115	no
ENSG00000120053	-0.283366	-2.015	0.0003	0.00199267	yes	0.0252106	0.180815	0.7544	0.897569	no
ENSG00000120055	-0.0501834	-0.0537114	0.92595	0.970494	no	-0.462187	-0.442452	0.44385	0.676289	no
ENSG00000120057	Inf	0	1	1	no	0	0	1	1	no
ENSG00000120071	-0.0300076	-0.0814353	0.8767	0.951275	no	0.0884097	0.200235	0.7311	0.885368	no
ENSG00000120158	-0.163981	-1.04928	0.0695	0.183536	no	-0.0315923	-0.206259	0.71525	0.877163	no
ENSG00000120159	-0.0425161	-0.227656	0.68955	0.861654	no	-0.0547338	-0.288245	0.6152	0.814078	no
ENSG00000120254	-0.454702	-2.35884	5e-05	0.000394466	yes	-0.588605	-2.81619	5e-05	0.000394466	yes
ENSG00000120314	-0.0636097	-0.229257	0.69115	0.862855	no	0.257998	0.931575	0.09965	0.241475	no
ENSG00000120334	-0.519674	-1.6206	0.00375	0.0173767	yes	0.0247801	0.0840666	0.8794	0.952009	no
ENSG00000120451	0.265702	1.2939	0.0233	0.0776849	no	-0.0840745	-0.41923	0.46095	0.692044	no
ENSG00000120458	-0.0246559	-0.11508	0.84025	0.936518	no	-0.280374	-1.40587	0.0137	0.0505764	no
ENSG00000120519	0.155872	0.95492	0.0925	0.228386	no	0.552843	3.21709	5e-05	0.000394466	yes
ENSG00000120549	0.231687	1.23311	0.03245	0.101329	no	0.0241678	0.137561	0.81195	0.924093	no
ENSG00000120616	0.0644182	0.314093	0.5852	0.791418	no	-0.174939	-0.885697	0.12265	0.281692	no
ENSG00000120647	-0.292718	-0.617055	0.26255	0.478883	no	-0.0968814	-0.206575	0.70515	0.871337	no
ENSG00000120656	0.00911783	0.0812355	0.88555	0.953596	no	-1.359	-10.8671	5e-05	0.000394466	yes
ENSG00000120658	0.574601	3.8829	5e-05	0.000394466	yes	0.449009	3.21199	5e-05	0.000394466	yes
ENSG00000120664	-1.19948	0	1	1	no	#NAME?	0	1	1	no
ENSG00000120669	-0.120647	-1.08538	0.05705	0.157539	no	0.0584453	0.53608	0.34515	0.576409	no
ENSG00000120685	0.245558	0.774381	0.16765	0.353094	no	0.644296	2.00724	0.00175	0.0091262	yes
ENSG00000120688	0.317085	1.64032	0.004	0.0183221	yes	0.270617	1.41364	0.01355	0.0501329	no
ENSG00000120693	-0.425562	-2.66107	0.0001	0.000748217	yes	-1.25965	-5.82632	5e-05	0.000394466	yes
ENSG00000120694	-0.318843	-2.04872	0.0003	0.00199267	yes	0.0652159	0.411067	0.45025	0.682342	no
ENSG00000120705	0.267047	1.90325	0.00065	0.00390953	yes	0.514334	3.62632	5e-05	0.000394466	yes
ENSG00000120725	0.202008	0.462572	0.38115	0.614194	no	-0.489468	-0.927924	0.0959	0.234347	no
ENSG00000120727	0.147527	1.15678	0.04255	0.125442	no	0.608934	4.80756	5e-05	0.000394466	yes
ENSG00000120729	2.82684	0	1	1	no	1.14763	0	1	1	no
ENSG00000120733	0.0349287	0.196478	0.7106	0.874617	no	0.0583012	0.330485	0.54235	0.759065	no
ENSG00000120784	-0.218462	-0.662106	0.225	0.431885	no	-0.0321599	-0.0986112	0.8589	0.943814	no
ENSG00000120802	-0.573431	-3.4648	5e-05	0.000394466	yes	-0.265043	-1.60048	0.00515	0.0225883	yes
ENSG00000120805	0.0568418	0.353207	0.54085	0.757821	no	0.138058	0.842263	0.14255	0.31441	no
ENSG00000120860	0.303226	2.72464	5e-05	0.000394466	yes	-0.410185	-3.65318	5e-05	0.000394466	yes
ENSG00000120875	-0.289518	-2.4046	5e-05	0.000394466	yes	0.514183	4.3064	5e-05	0.000394466	yes
ENSG00000120889	0.0293878	0.192367	0.736	0.887904	no	-0.0243783	-0.159901	0.77615	0.907959	no
ENSG00000120899	0.499422	2.04127	0.00035	0.00228343	yes	0.343822	1.42724	0.0125	0.0469793	yes
ENSG00000120910	0.0554307	0.254724	0.64795	0.835788	no	0.0961241	0.454391	0.40985	0.64275	no
ENSG00000120915	-0.233242	-1.37326	0.0159	0.0570293	no	-0.559195	-3.1293	5e-05	0.000394466	yes
ENSG00000120925	0.121295	0.102009	0.776	0.907918	no	-0.0461025	-0.0430079	0.91015	0.963839	no
ENSG00000120948	-0.0828503	-0.558938	0.3303	0.559642	no	0.125729	0.855391	0.1375	0.30631	no
ENSG00000120963	0.108877	0.778592	0.1662	0.350948	no	0.0884841	0.611536	0.2786	0.498923	no
ENSG00000120992	-0.0463369	-0.291394	0.60095	0.803341	no	-0.0821411	-0.519221	0.351	0.582455	no
ENSG00000121039	-0.16568	-0.18991	0.6629	0.844588	no	-0.130887	-0.131325	0.7517	0.896226	no
ENSG00000121057	-0.165801	-1.19556	0.02205	0.0743634	no	-0.164879	-1.19006	0.0246	0.0811352	no
ENSG00000121058	0.0805573	0.617726	0.27805	0.498325	no	-0.0233264	-0.181686	0.7502	0.895264	no
ENSG00000121060	-0.129311	-0.495597	0.38695	0.620148	no	-0.262594	-0.976174	0.09175	0.22701	no
ENSG00000121067	0.0581759	0.355031	0.528	0.748093	no	0.215992	1.36153	0.0179	0.0627639	no
ENSG00000121101	-0.479898	0	1	1	no	0.0509456	0	1	1	no
ENSG00000121210	-0.46766	-1.45056	0.017	0.0602259	no	0.208836	0.932279	0.0987	0.239666	no
ENSG00000121270	0.782767	0.226861	0.35795	0.589958	no	0.718526	0.197211	0.41145	0.644238	no
ENSG00000121274	0.169173	1.29386	0.02345	0.0781098	no	0.0286726	0.23875	0.67285	0.850689	no
ENSG00000121310	0.0877099	0.559353	0.3255	0.554188	no	-0.179279	-1.0875	0.0545	0.152097	no
ENSG00000121350	-0.320841	-0.822672	0.14945	0.325584	no	-0.931633	-1.9942	0.00145	0.00779664	yes
ENSG00000121390	-0.25367	-2.00141	0.0006	0.00365163	yes	-0.0359229	-0.283782	0.61985	0.817283	no
ENSG00000121406	-0.0116551	-0.0597085	0.91435	0.965828	no	0.0309288	0.161822	0.77135	0.905558	no
ENSG00000121413	-0.726029	-4.29432	5e-05	0.000394466	yes	-1.5239	-8.09707	5e-05	0.000394466	yes
ENSG00000121440	-0.0483101	-0.246049	0.6627	0.84443	no	-0.0257997	-0.132721	0.81305	0.924471	no
ENSG00000121481	-0.0184255	-0.121548	0.8276	0.930924	no	-0.0430185	-0.269087	0.63715	0.828612	no
ENSG00000121486	0.00236562	0.0110542	0.98545	0.991591	no	0.024605	0.116356	0.8413	0.936858	no
ENSG00000121542	0.138449	0.494767	0.38615	0.61935	no	0.0678766	0.234216	0.6807	0.856139	no
ENSG00000121578	0.116609	0.830676	0.1379	0.30683	no	0.338798	2.54305	5e-05	0.000394466	yes
ENSG00000121579	-0.701076	-4.41522	5e-05	0.000394466	yes	0.0602998	0.383346	0.5004	0.725811	no
ENSG00000121644	-0.572493	-4.13398	5e-05	0.000394466	yes	-0.622202	-4.39484	5e-05	0.000394466	yes
ENSG00000121691	0.293771	2.24782	0.0001	0.000748217	yes	-0.105966	-0.81032	0.13915	0.308966	no
ENSG00000121741	0.167608	0.818059	0.1333	0.299507	no	0.264537	1.29245	0.02425	0.0802053	no
ENSG00000121749	0.243475	1.84821	0.0012	0.00663203	yes	0.303198	2.25866	0.00015	0.00108114	yes
ENSG00000121769	#NAME?	0	1	1	no	1.49347	0	1	1	no
ENSG00000121774	-0.210033	-1.70687	0.00285	0.0137829	yes	0.0405881	0.330436	0.5677	0.778356	no
ENSG00000121775	-0.194087	-0.354305	0.53185	0.751108	no	-0.0924467	-0.164331	0.7749	0.907244	no
ENSG00000121853	0	0	1	1	no	0	0	1	1	no
ENSG00000121879	-0.0534907	-0.1771	0.7548	0.897736	no	-0.233242	-0.748555	0.18715	0.38077	no
ENSG00000121892	-0.0337248	-0.16426	0.7468	0.893595	no	0.000241441	0.00115317	0.998	0.998703	no
ENSG00000121903	0.0821195	0.441529	0.437	0.669776	no	0.048056	0.269598	0.6375	0.828931	no
ENSG00000121940	0.047673	0.284976	0.61485	0.813829	no	0.146073	0.8909	0.11975	0.276765	no
ENSG00000121957	-0.30384	-1.02643	0.0764	0.197252	no	0.134803	0.469241	0.41215	0.645097	no
ENSG00000121964	-0.0937774	-0.392088	0.48625	0.713944	no	-0.277904	-1.15098	0.0363	0.11087	no
ENSG00000121988	-0.415003	-0.745157	0.2053	0.405728	no	-0.860223	-1.6061	0.0073	0.0302255	yes
ENSG00000121989	-0.223226	-0.659284	0.2433	0.455195	no	-0.010504	-0.0343164	0.95285	0.979194	no
ENSG00000122008	0.407781	1.87525	0.0008	0.00468454	yes	0.466404	2.2003	5e-05	0.000394466	yes
ENSG00000122026	-0.0441578	-0.359251	0.5281	0.748139	no	0.256159	2.06503	0.0002	0.00139451	yes
ENSG00000122034	-0.359256	-2.57511	5e-05	0.000394466	yes	-0.1515	-1.10779	0.0542	0.151466	no
ENSG00000122042	0.193821	1.60058	0.0049	0.0216772	yes	0.0397849	0.327947	0.56065	0.773632	no
ENSG00000122068	0.150525	0.843318	0.13825	0.307473	no	0.369559	1.97093	0.00065	0.00390953	yes
ENSG00000122085	0.15996	0.798931	0.1624	0.345386	no	0.154485	0.749149	0.1923	0.387631	no
ENSG00000122126	0.18914	1.41451	0.0157	0.0564839	no	-0.0634174	-0.471405	0.41465	0.647473	no
ENSG00000122203	-0.0301134	-0.218757	0.6974	0.866691	no	-0.136556	-0.986381	0.07285	0.190278	no
ENSG00000122257	-0.0214034	-0.0980806	0.86375	0.945602	no	0.192859	0.873463	0.12565	0.28668	no
[truncated: 4,512 more rows]
