# Supplementary material for: HNRNPM controls circRNA biogenesis and splicing fidelity to sustain cancer cell fitness
Source: eLife. 2021 Jun 2;10:e59654. doi: 10.7554/eLife.59654 (PMC8346284; doi:10.7554/eLife.59654)
Supplement: Figure 4—source data 2. [file elife-59654-fig4-data2.xlsx]

## Sheet: Source Data 4
Source Data 4: Binding Status of all significantly differentially expressed genes in HNRNPM knockdown
Ensembl_gene_id	B7/SCR Log2(fold_change)	B7/SCR Test_Stat	B7/SCR p_value	B7/SCR q_value	B7/SCR significant	B9/SCR Log2(fold_change)	B9/SCR Test_Stat	B9/SCR p_value	B9/SCR q_value	B9/SCR significant	Bound
ENSG00000001630	0.233317	1.81751	0.00135	0.00733226	yes	0.366083	2.82151	5e-05	0.000394466	yes	TRUE
ENSG00000002834	0.422494	3.29772	5e-05	0.000394466	yes	0.206207	1.5481	0.0074	0.0305641	yes	FALSE
ENSG00000003436	0.344237	2.14522	0.00025	0.00169574	yes	0.778459	4.88572	5e-05	0.000394466	yes	TRUE
ENSG00000003989	-0.854214	-5.61198	5e-05	0.000394466	yes	-1.99327	-13.7497	5e-05	0.000394466	yes	FALSE
ENSG00000004455	0.23737	1.72936	0.00275	0.0133764	yes	0.209854	1.5028	0.0099	0.0388061	yes	FALSE
ENSG00000004660	0.261441	2.28429	5e-05	0.000394466	yes	0.646107	5.67657	5e-05	0.000394466	yes	TRUE
ENSG00000004700	-0.325337	-1.7482	0.00285	0.0137829	yes	-0.472434	-2.60548	5e-05	0.000394466	yes	FALSE
ENSG00000004866	-0.304851	-1.98682	0.0003	0.00199267	yes	-0.458787	-2.96935	5e-05	0.000394466	yes	TRUE
ENSG00000005001	1.21083	3.0367	5e-05	0.000394466	yes	1.55231	4.03195	5e-05	0.000394466	yes	FALSE
ENSG00000005022	-0.422084	-3.55816	5e-05	0.000394466	yes	-0.279544	-2.36231	0.0001	0.000748217	yes	FALSE
ENSG00000005238	-0.392313	-2.51799	5e-05	0.000394466	yes	0.689311	5.21246	5e-05	0.000394466	yes	FALSE
ENSG00000005436	-0.551007	-2.10165	0.0003	0.00199267	yes	-0.480095	-1.80302	0.0019	0.00979865	yes	TRUE
ENSG00000005486	0.322936	2.32564	5e-05	0.000394466	yes	-0.422409	-3.16358	5e-05	0.000394466	yes	FALSE
ENSG00000005893	0.306597	2.34789	5e-05	0.000394466	yes	0.501027	3.87648	5e-05	0.000394466	yes	FALSE
ENSG00000006062	0.419499	1.55303	0.0085	0.0343066	yes	0.756708	2.65197	5e-05	0.000394466	yes	TRUE
ENSG00000006327	1.05836	7.38361	5e-05	0.000394466	yes	0.596148	3.94536	5e-05	0.000394466	yes	FALSE
ENSG00000006459	0.569422	2.28613	5e-05	0.000394466	yes	0.42879	1.82403	0.00115	0.00640105	yes	TRUE
ENSG00000006625	-0.390734	-1.80916	0.0017	0.00891245	yes	-0.441115	-2.10359	0.00045	0.00285055	yes	FALSE
ENSG00000006652	-0.314661	-2.20369	5e-05	0.000394466	yes	-0.384339	-2.61045	5e-05	0.000394466	yes	TRUE
ENSG00000007968	-0.863077	-3.71171	5e-05	0.000394466	yes	-0.476111	-1.83356	0.0021	0.0106535	yes	FALSE
ENSG00000008256	0.294474	1.81972	0.00105	0.00591759	yes	-0.432215	-2.69182	5e-05	0.000394466	yes	TRUE
ENSG00000009780	0.308686	1.78475	0.00205	0.010441	yes	0.31635	1.99888	0.001	0.00567333	yes	FALSE
ENSG00000010318	-0.71425	-3.39487	5e-05	0.000394466	yes	-0.886256	-3.4756	5e-05	0.000394466	yes	TRUE
ENSG00000011007	0.352327	2.53968	5e-05	0.000394466	yes	0.562251	4.12738	5e-05	0.000394466	yes	TRUE
ENSG00000011677	0.737392	1.71738	0.0021	0.0106535	yes	1.05292	3.20594	5e-05	0.000394466	yes	FALSE
ENSG00000012048	-0.665165	-3.03556	5e-05	0.000394466	yes	-0.649328	-2.96302	5e-05	0.000394466	yes	TRUE
ENSG00000012223	-0.482734	-1.47064	0.00755	0.0310586	yes	-2.30065	-3.77833	5e-05	0.000394466	yes	FALSE
ENSG00000013523	-0.363234	-2.51966	5e-05	0.000394466	yes	-0.292645	-1.95246	0.0007	0.00417041	yes	TRUE
ENSG00000013573	-0.556472	-3.11099	5e-05	0.000394466	yes	-0.321458	-1.81241	0.00225	0.0113068	yes	TRUE
ENSG00000014123	0.48869	3.50543	5e-05	0.000394466	yes	0.337087	2.49307	5e-05	0.000394466	yes	FALSE
ENSG00000014138	-0.663298	-3.83383	5e-05	0.000394466	yes	-0.257947	-1.72027	0.00295	0.0141872	yes	FALSE
ENSG00000014824	-0.257211	-1.66095	0.00365	0.0170029	yes	-0.486353	-3.11991	5e-05	0.000394466	yes	TRUE
ENSG00000015592	1.2543	1.98362	0.00025	0.00169574	yes	-1.8138	-1.22841	0.0024	0.0119296	yes	FALSE
ENSG00000015676	-0.839511	-3.72931	5e-05	0.000394466	yes	-1.0066	-4.92213	5e-05	0.000394466	yes	TRUE
ENSG00000020922	-0.537014	-2.49661	5e-05	0.000394466	yes	-0.38523	-1.66294	0.00445	0.0199963	yes	TRUE
ENSG00000021300	0.250287	1.87261	0.00045	0.00285055	yes	-0.270688	-2.02546	0.0002	0.00139451	yes	FALSE
ENSG00000023287	0.422395	2.51429	5e-05	0.000394466	yes	0.383026	2.26654	5e-05	0.000394466	yes	TRUE
ENSG00000023445	0.921044	4.37275	5e-05	0.000394466	yes	0.903681	4.29461	5e-05	0.000394466	yes	FALSE
ENSG00000023572	-0.292845	-2.46293	5e-05	0.000394466	yes	0.454766	4.04555	5e-05	0.000394466	yes	FALSE
ENSG00000024526	-0.662622	-3.02397	5e-05	0.000394466	yes	-0.362228	-1.47941	0.00845	0.0341372	yes	FALSE
ENSG00000025156	-1.96548	-13.3912	5e-05	0.000394466	yes	-2.27548	-17.0537	5e-05	0.000394466	yes	FALSE
ENSG00000025800	0.301153	1.75291	0.0022	0.0110897	yes	0.334341	2.01281	0.00065	0.00390953	yes	TRUE
ENSG00000026297	0.520314	3.09268	5e-05	0.000394466	yes	0.473402	2.80969	5e-05	0.000394466	yes	TRUE
ENSG00000026950	-0.843598	-4.1569	5e-05	0.000394466	yes	-0.386579	-1.88339	0.00085	0.00494128	yes	FALSE
ENSG00000028528	0.467473	3.30652	5e-05	0.000394466	yes	0.318921	2.24708	5e-05	0.000394466	yes	FALSE
ENSG00000029993	-0.451741	-2.43342	0.00015	0.00108114	yes	-0.3755	-2.09166	0.0003	0.00199267	yes	FALSE
ENSG00000030582	0.547057	4.0656	5e-05	0.000394466	yes	0.561073	4.11494	5e-05	0.000394466	yes	TRUE
ENSG00000031003	0.333706	1.66686	0.0045	0.0201898	yes	0.704097	3.36742	5e-05	0.000394466	yes	TRUE
ENSG00000031544	1.87836	1.16047	0.00165	0.00869476	yes	2.78828	1.76617	5e-05	0.000394466	yes	FALSE
ENSG00000031698	-0.352376	-2.79084	5e-05	0.000394466	yes	-1.03996	-8.19692	5e-05	0.000394466	yes	TRUE
ENSG00000032389	-0.192471	-1.6756	0.0034	0.0160162	yes	-0.290149	-2.1667	0.00055	0.00339017	yes	TRUE
ENSG00000033100	0.360633	1.84043	0.0015	0.00802265	yes	0.411537	2.08343	0.0002	0.00139451	yes	TRUE
ENSG00000035499	-0.859281	-6.50289	5e-05	0.000394466	yes	-0.573721	-4.45455	5e-05	0.000394466	yes	TRUE
ENSG00000035664	0.548318	2.86838	5e-05	0.000394466	yes	0.499352	2.67379	5e-05	0.000394466	yes	FALSE
ENSG00000036448	-0.737472	-1.20131	0.0062	0.0263992	yes	-0.721478	-1.25358	0.0035	0.016423	yes	FALSE
ENSG00000038002	-0.311506	-1.83978	0.0019	0.00979865	yes	-0.804868	-2.55694	5e-05	0.000394466	yes	FALSE
ENSG00000038210	-0.440241	-1.71068	0.00255	0.0125635	yes	-0.807275	-3.62549	5e-05	0.000394466	yes	TRUE
ENSG00000039139	-0.317354	-1.56328	0.0059	0.0253499	yes	-1.11586	-4.49895	5e-05	0.000394466	yes	TRUE
ENSG00000040275	-0.586292	-3.37752	5e-05	0.000394466	yes	-0.273401	-1.47978	0.0099	0.0388061	yes	FALSE
ENSG00000040608	0.206205	1.63527	0.0034	0.0160162	yes	0.242861	1.92682	0.0008	0.00468454	yes	FALSE
ENSG00000040633	0.408546	3.25074	5e-05	0.000394466	yes	0.260869	2.07188	0.00025	0.00169574	yes	FALSE
ENSG00000042286	-1.80228	-2.49601	0.0002	0.00139451	yes	-2.77432	-3.05378	5e-05	0.000394466	yes	TRUE
ENSG00000043355	1.42897	6.48618	5e-05	0.000394466	yes	1.43905	6.46384	5e-05	0.000394466	yes	FALSE
ENSG00000043591	0.502761	2.83183	5e-05	0.000394466	yes	1.12273	6.83255	5e-05	0.000394466	yes	FALSE
ENSG00000044459	-0.518542	-4.29586	5e-05	0.000394466	yes	-0.800696	-6.37445	5e-05	0.000394466	yes	TRUE
ENSG00000044574	0.474544	4.05907	5e-05	0.000394466	yes	0.613778	5.25069	5e-05	0.000394466	yes	FALSE
ENSG00000046604	-0.20254	-1.69662	0.00215	0.0108713	yes	0.705383	5.89815	5e-05	0.000394466	yes	FALSE
ENSG00000046651	0.413822	2.38247	5e-05	0.000394466	yes	0.40971	2.30325	0.0001	0.000748217	yes	TRUE
ENSG00000047056	0.699714	3.6376	5e-05	0.000394466	yes	1.51449	8.51632	5e-05	0.000394466	yes	TRUE
ENSG00000047249	0.487894	3.80642	5e-05	0.000394466	yes	0.291921	2.23575	0.0001	0.000748217	yes	TRUE
ENSG00000047346	0.278228	1.61283	0.00475	0.0211284	yes	0.638989	3.68795	5e-05	0.000394466	yes	TRUE
ENSG00000048028	0.393518	2.01058	0.0005	0.00312122	yes	0.527001	2.6859	5e-05	0.000394466	yes	FALSE
ENSG00000048342	-0.427547	-1.72742	0.0017	0.00891245	yes	-0.724341	-2.64201	5e-05	0.000394466	yes	FALSE
ENSG00000049449	-0.573062	-3.6454	5e-05	0.000394466	yes	-0.720144	-4.55498	5e-05	0.000394466	yes	TRUE
ENSG00000049769	-0.91199	-1.86694	0.00265	0.0129582	yes	-1.17493	-2.54039	5e-05	0.000394466	yes	TRUE
ENSG00000050344	-0.403023	-1.75484	0.00185	0.00957288	yes	-0.373312	-1.62651	0.00445	0.0199963	yes	FALSE
ENSG00000050405	0.685429	4.66467	5e-05	0.000394466	yes	0.516837	3.45501	5e-05	0.000394466	yes	FALSE
ENSG00000051180	-0.708629	-3.3914	5e-05	0.000394466	yes	-0.381014	-2.0027	0.00035	0.00228343	yes	FALSE
ENSG00000051341	-0.808533	-3.04725	5e-05	0.000394466	yes	-0.438238	-1.83657	0.0011	0.00616363	yes	TRUE
ENSG00000051596	-0.35561	-2.29403	5e-05	0.000394466	yes	0.274449	1.74292	0.0026	0.0127622	yes	FALSE
ENSG00000052802	0.489248	3.54953	5e-05	0.000394466	yes	0.77132	5.72684	5e-05	0.000394466	yes	FALSE
ENSG00000053501	-0.25869	-2.03276	0.0004	0.00256373	yes	-0.608002	-4.72352	5e-05	0.000394466	yes	FALSE
ENSG00000053747	0.755797	3.55308	5e-05	0.000394466	yes	1.13487	5.17636	5e-05	0.000394466	yes	TRUE
ENSG00000053900	-0.301222	-1.8705	0.00305	0.0145908	yes	-0.279975	-1.66732	0.00485	0.0214903	yes	TRUE
ENSG00000054267	0.483065	1.64085	0.0009	0.00518136	yes	0.454731	1.5037	0.0017	0.00891245	yes	TRUE
ENSG00000054392	-0.287781	-1.34137	0.0088	0.0352656	yes	-2.08234	-3.61951	5e-05	0.000394466	yes	FALSE
ENSG00000054965	0.303472	1.74308	0.00285	0.0137829	yes	0.337999	1.96468	0.00085	0.00494128	yes	TRUE
ENSG00000055118	0.328974	2.47411	5e-05	0.000394466	yes	0.216125	1.60475	0.00565	0.0244483	yes	TRUE
ENSG00000055211	0.289068	2.49716	5e-05	0.000394466	yes	0.293467	2.54421	5e-05	0.000394466	yes	FALSE
ENSG00000055813	0.634736	1.71173	0.00435	0.0196218	yes	1.11583	3.0064	5e-05	0.000394466	yes	FALSE
ENSG00000056736	-0.228076	-1.90299	0.0009	0.00518136	yes	-0.263023	-2.18062	0.0001	0.000748217	yes	FALSE
ENSG00000057757	-0.203947	-1.90302	0.001	0.00567333	yes	0.511623	4.38688	5e-05	0.000394466	yes	FALSE
ENSG00000058063	0.411993	2.39415	5e-05	0.000394466	yes	0.298451	1.73894	0.00255	0.0125635	yes	FALSE
ENSG00000058804	-0.613543	-4.59493	5e-05	0.000394466	yes	-0.206838	-1.54971	0.0067	0.0282137	yes	TRUE
ENSG00000059691	-0.393112	-3.03436	5e-05	0.000394466	yes	-0.211829	-1.76273	0.002	0.0102249	yes	TRUE
ENSG00000060642	-0.192492	-1.59519	0.005	0.0220281	yes	-0.617311	-4.72207	5e-05	0.000394466	yes	TRUE
ENSG00000060762	0.495946	4.2986	5e-05	0.000394466	yes	0.353764	3.04662	5e-05	0.000394466	yes	FALSE
ENSG00000060971	0.345224	2.45525	5e-05	0.000394466	yes	0.228807	1.58923	0.0062	0.0263992	yes	FALSE
ENSG00000060982	-1.10204	-1.77261	0.0003	0.00199267	yes	-1.75044	-2.51815	5e-05	0.000394466	yes	FALSE
ENSG00000061918	2.58461	4.86278	5e-05	0.000394466	yes	2.89537	5.50169	5e-05	0.000394466	yes	FALSE
ENSG00000062282	-0.25233	-1.91527	0.0006	0.00365163	yes	-0.472607	-2.87579	5e-05	0.000394466	yes	FALSE
ENSG00000063241	-0.285762	-2.27551	5e-05	0.000394466	yes	-0.333751	-2.64641	5e-05	0.000394466	yes	FALSE
ENSG00000063244	0.252135	1.75645	0.00215	0.0108713	yes	0.396802	2.81999	5e-05	0.000394466	yes	TRUE
ENSG00000063245	0.86519	6.61025	5e-05	0.000394466	yes	1.21373	9.45273	5e-05	0.000394466	yes	TRUE
ENSG00000063587	-0.196512	-1.49762	0.0095	0.0376082	yes	0.242418	2.0198	0.0005	0.00312122	yes	TRUE
ENSG00000063854	-0.399325	-1.84689	0.00135	0.00733226	yes	-0.784642	-3.38931	5e-05	0.000394466	yes	TRUE
ENSG00000064042	0.620216	2.76462	5e-05	0.000394466	yes	0.39437	1.77992	0.0017	0.00891245	yes	TRUE
ENSG00000064601	0.490197	3.34429	5e-05	0.000394466	yes	0.645536	4.37191	5e-05	0.000394466	yes	FALSE
ENSG00000064787	1.04882	2.0699	0.0007	0.00417041	yes	1.72772	3.2037	5e-05	0.000394466	yes	FALSE
ENSG00000064933	-0.673069	-3.79802	5e-05	0.000394466	yes	-0.749599	-4.87377	5e-05	0.000394466	yes	TRUE
ENSG00000064961	-0.349641	-2.10551	0.00015	0.00108114	yes	-0.245232	-1.50385	0.0077	0.0315631	yes	FALSE
ENSG00000065029	-0.303633	-2.56077	5e-05	0.000394466	yes	-0.607426	-5.02174	5e-05	0.000394466	yes	FALSE
ENSG00000065135	0.258287	2.17853	0.0001	0.000748217	yes	0.317225	2.67682	5e-05	0.000394466	yes	TRUE
ENSG00000065150	-0.234923	-1.69642	0.0011	0.00616363	yes	0.311095	2.28225	5e-05	0.000394466	yes	FALSE
ENSG00000065534	0.875624	2.43423	5e-05	0.000394466	yes	1.14809	3.273	5e-05	0.000394466	yes	TRUE
ENSG00000065559	0.278314	1.56878	0.0067	0.0282137	yes	0.347347	1.84161	0.00155	0.00824944	yes	TRUE
ENSG00000065618	1.22513	1.29113	0.00205	0.010441	yes	1.33235	1.37034	0.0007	0.00417041	yes	FALSE
ENSG00000065809	-0.645179	-3.478	5e-05	0.000394466	yes	-0.634724	-3.17135	5e-05	0.000394466	yes	TRUE
ENSG00000065882	0.47106	2.51482	5e-05	0.000394466	yes	0.327102	1.76318	0.00175	0.0091262	yes	TRUE
ENSG00000065911	-0.854361	-5.11091	5e-05	0.000394466	yes	-0.575996	-3.57898	5e-05	0.000394466	yes	FALSE
ENSG00000066027	0.582709	4.43091	5e-05	0.000394466	yes	0.817033	6.1941	5e-05	0.000394466	yes	TRUE
ENSG00000066084	0.358042	2.47672	5e-05	0.000394466	yes	0.29636	1.95997	0.0001	0.000748217	yes	TRUE
ENSG00000066279	-0.631343	-4.96039	5e-05	0.000394466	yes	-0.216911	-1.76823	0.00175	0.0091262	yes	TRUE
ENSG00000066468	-0.623401	-3.4645	5e-05	0.000394466	yes	0.626592	4.22075	5e-05	0.000394466	yes	TRUE
ENSG00000066583	-0.329908	-2.69976	5e-05	0.000394466	yes	-0.192811	-1.54384	0.0073	0.0302255	yes	FALSE
ENSG00000067048	0.322723	1.51588	0.00865	0.0347903	yes	0.466568	2.15355	0.0003	0.00199267	yes	TRUE
ENSG00000067064	0.474847	2.3704	5e-05	0.000394466	yes	0.617531	3.03775	5e-05	0.000394466	yes	TRUE
ENSG00000067082	-0.485941	-1.84275	0.0009	0.00518136	yes	-0.44391	-1.82246	0.0015	0.00802265	yes	FALSE
ENSG00000067177	-0.622312	-5.36089	5e-05	0.000394466	yes	-0.893312	-7.59749	5e-05	0.000394466	yes	TRUE
ENSG00000067221	0.252278	1.6728	0.00285	0.0137829	yes	-0.217425	-1.41045	0.0116	0.0442271	yes	FALSE
ENSG00000067225	0.306128	2.48308	5e-05	0.000394466	yes	0.287996	2.33998	5e-05	0.000394466	yes	TRUE
ENSG00000067248	0.385277	3.06639	5e-05	0.000394466	yes	0.34171	2.71828	5e-05	0.000394466	yes	FALSE
ENSG00000068001	0.22367	1.49251	0.00795	0.0324295	yes	0.280269	1.85454	0.0011	0.00616363	yes	FALSE
ENSG00000068024	-1.49998	-3.07445	5e-05	0.000394466	yes	-2.41673	-2.90016	5e-05	0.000394466	yes	TRUE
ENSG00000068028	-0.18634	-1.68697	0.0036	0.0168082	yes	-0.21082	-1.91241	0.0009	0.00518136	yes	TRUE
ENSG00000068078	0.950425	2.51421	5e-05	0.000394466	yes	1.36914	4.15591	5e-05	0.000394466	yes	FALSE
ENSG00000068366	0.865366	3.94893	5e-05	0.000394466	yes	0.504064	2.33953	5e-05	0.000394466	yes	FALSE
ENSG00000068697	0.282845	2.05137	0.00045	0.00285055	yes	0.395162	2.8305	5e-05	0.000394466	yes	FALSE
ENSG00000068745	0.307937	2.32242	5e-05	0.000394466	yes	0.353517	2.66932	5e-05	0.000394466	yes	TRUE
ENSG00000069869	0.332884	1.40511	0.0123	0.0463882	yes	-0.523893	-1.75793	0.0032	0.0151942	yes	TRUE
ENSG00000070061	0.57306	4.2914	5e-05	0.000394466	yes	0.654898	5.00402	5e-05	0.000394466	yes	TRUE
ENSG00000070081	0.663044	4.57504	5e-05	0.000394466	yes	0.300202	2.07231	0.0002	0.00139451	yes	TRUE
ENSG00000070087	0.288238	1.61923	0.0052	0.0227715	yes	0.496973	2.6613	5e-05	0.000394466	yes	TRUE
ENSG00000070214	0.367414	2.23223	5e-05	0.000394466	yes	0.339334	2.07913	5e-05	0.000394466	yes	TRUE
ENSG00000070269	-0.751345	-3.75092	5e-05	0.000394466	yes	-1.26306	-4.87848	5e-05	0.000394466	yes	FALSE
ENSG00000070526	-0.605733	-3.56423	5e-05	0.000394466	yes	-0.328176	-1.90415	0.0013	0.00709758	yes	FALSE
ENSG00000070669	-0.69793	-5.12817	5e-05	0.000394466	yes	-1.4247	-10.4305	5e-05	0.000394466	yes	TRUE
ENSG00000070985	1.05898	3.38221	5e-05	0.000394466	yes	-0.670036	-1.50169	0.00365	0.0170029	yes	FALSE
ENSG00000071051	-0.427659	-2.28884	0.00015	0.00108114	yes	-0.484907	-3.04949	5e-05	0.000394466	yes	TRUE
ENSG00000071073	0.495255	1.66113	0.0044	0.0198021	yes	0.433302	1.4551	0.0127	0.0475921	yes	FALSE
ENSG00000071127	0.203828	1.38284	0.0135	0.0499847	yes	0.279643	1.93558	0.0007	0.00417041	yes	TRUE
ENSG00000071205	-0.201406	-1.44232	0.01315	0.0489374	yes	0.286916	2.05558	0.0002	0.00139451	yes	TRUE
ENSG00000071282	1.58802	1.5573	0.0015	0.00802265	yes	2.74748	2.95449	5e-05	0.000394466	yes	FALSE
ENSG00000071462	0.230012	1.50475	0.00795	0.0324295	yes	0.464887	3.07701	5e-05	0.000394466	yes	TRUE
ENSG00000071553	0.641018	5.08674	5e-05	0.000394466	yes	0.31665	2.48087	5e-05	0.000394466	yes	FALSE
ENSG00000071859	0.278839	2.10194	0.00045	0.00285055	yes	0.292168	2.16542	0.00015	0.00108114	yes	TRUE
ENSG00000071889	0.213193	1.8288	0.00165	0.00869476	yes	-0.189345	-1.5129	0.00885	0.0354173	yes	FALSE
ENSG00000072042	0.292823	2.023	0.0003	0.00199267	yes	-0.316807	-2.13437	0.00015	0.00108114	yes	TRUE
ENSG00000072274	-0.284802	-1.72322	0.00015	0.00108114	yes	0.495351	3.05839	5e-05	0.000394466	yes	FALSE
ENSG00000072571	-0.903156	-5.36706	5e-05	0.000394466	yes	-0.595905	-3.58484	5e-05	0.000394466	yes	FALSE
ENSG00000072682	0.392011	1.63269	0.00335	0.0158116	yes	-0.581449	-2.14456	0.00025	0.00169574	yes	TRUE
ENSG00000072778	0.252836	1.60454	0.0036	0.0168082	yes	-0.223303	-1.40135	0.0122	0.0460644	yes	TRUE
ENSG00000072954	0.352099	1.69887	0.00285	0.0137829	yes	0.691251	3.1797	5e-05	0.000394466	yes	FALSE
ENSG00000073150	0.405344	2.15858	5e-05	0.000394466	yes	0.646696	3.59592	5e-05	0.000394466	yes	FALSE
ENSG00000073712	0.711759	5.94846	5e-05	0.000394466	yes	-0.267086	-2.30046	5e-05	0.000394466	yes	FALSE
ENSG00000073849	-0.693285	-1.85704	0.00035	0.00228343	yes	-1.33167	-2.92197	5e-05	0.000394466	yes	TRUE
ENSG00000073969	0.587844	3.28392	5e-05	0.000394466	yes	0.56591	3.09281	5e-05	0.000394466	yes	FALSE
ENSG00000074410	1.91481	13.398	5e-05	0.000394466	yes	1.50212	9.97833	5e-05	0.000394466	yes	FALSE
ENSG00000074657	0.358833	1.48766	0.0082	0.0332948	yes	0.692506	2.93079	5e-05	0.000394466	yes	TRUE
ENSG00000074800	0.304352	2.54349	5e-05	0.000394466	yes	0.216359	1.80087	0.0016	0.00848051	yes	TRUE
ENSG00000074935	-0.527695	-3.74181	5e-05	0.000394466	yes	-0.621895	-4.56596	5e-05	0.000394466	yes	FALSE
ENSG00000075043	-0.392583	-1.90113	0.0003	0.00199267	yes	0.411083	2.3151	0.0001	0.000748217	yes	FALSE
ENSG00000075089	0.259772	1.6967	0.00335	0.0158116	yes	0.462055	3.07733	5e-05	0.000394466	yes	FALSE
ENSG00000075142	-0.471464	-3.32369	5e-05	0.000394466	yes	-0.196857	-1.44994	0.01115	0.0428447	yes	FALSE
ENSG00000075151	-1.22092	-7.43352	5e-05	0.000394466	yes	-2.10286	-10.5455	5e-05	0.000394466	yes	TRUE
ENSG00000075240	-0.488662	-1.4202	0.00955	0.0377414	yes	-0.972544	-2.61574	5e-05	0.000394466	yes	TRUE
ENSG00000075336	-0.281728	-2.49469	5e-05	0.000394466	yes	0.473139	3.77937	5e-05	0.000394466	yes	TRUE
ENSG00000075426	0.583978	2.23137	5e-05	0.000394466	yes	0.828052	3.19293	5e-05	0.000394466	yes	FALSE
ENSG00000075618	-0.460081	-3.587	5e-05	0.000394466	yes	-0.3583	-2.94413	5e-05	0.000394466	yes	TRUE
ENSG00000075643	-0.644991	-2.2557	5e-05	0.000394466	yes	-1.11069	-3.29539	5e-05	0.000394466	yes	TRUE
ENSG00000075702	-0.768569	-3.90988	5e-05	0.000394466	yes	-0.305386	-1.68971	0.003	0.0143914	yes	FALSE
ENSG00000076043	1.08301	7.09171	5e-05	0.000394466	yes	0.726152	4.69785	5e-05	0.000394466	yes	TRUE
ENSG00000076321	0.375767	2.11766	0.00025	0.00169574	yes	0.445808	2.436	5e-05	0.000394466	yes	TRUE
ENSG00000077232	-0.379016	-2.08666	5e-05	0.000394466	yes	-0.349332	-1.93197	0.00105	0.00591759	yes	TRUE
ENSG00000077235	0.267232	1.3543	0.01345	0.0498462	yes	0.303522	1.60413	0.0037	0.0171896	yes	TRUE
ENSG00000077254	0.949075	5.76445	5e-05	0.000394466	yes	1.11165	6.81295	5e-05	0.000394466	yes	TRUE
ENSG00000077514	-0.63209	-2.64917	5e-05	0.000394466	yes	-0.475046	-2.11391	0.00125	0.0068727	yes	FALSE
ENSG00000077585	0.605535	2.28783	5e-05	0.000394466	yes	0.445865	2.18018	0.0003	0.00199267	yes	TRUE
ENSG00000077782	0.387503	1.73689	0.00175	0.0091262	yes	0.61211	2.4541	5e-05	0.000394466	yes	TRUE
ENSG00000078018	0.974017	3.16479	5e-05	0.000394466	yes	1.56751	5.10665	5e-05	0.000394466	yes	FALSE
ENSG00000078808	0.264917	1.98367	0.00035	0.00228343	yes	0.199736	1.50453	0.00885	0.0354173	yes	TRUE
ENSG00000078902	0.325083	2.17211	0.0001	0.000748217	yes	0.640163	3.49908	5e-05	0.000394466	yes	TRUE
ENSG00000079156	-0.969163	-1.64055	0.00055	0.00339017	yes	-1.96307	-2.56037	5e-05	0.000394466	yes	FALSE
ENSG00000079215	-0.672654	-2.25643	5e-05	0.000394466	yes	0.584932	2.52214	5e-05	0.000394466	yes	FALSE
ENSG00000079335	-0.689928	-3.10524	5e-05	0.000394466	yes	-0.902983	-5.25709	5e-05	0.000394466	yes	TRUE
ENSG00000079459	0.372771	2.7878	5e-05	0.000394466	yes	0.413284	3.06974	5e-05	0.000394466	yes	TRUE
ENSG00000079616	-0.416765	-3.05414	5e-05	0.000394466	yes	-0.235869	-1.71892	0.0035	0.016423	yes	FALSE
ENSG00000079739	0.345323	2.20023	5e-05	0.000394466	yes	0.281084	1.74934	0.0018	0.00935173	yes	FALSE
ENSG00000080224	-0.923953	-6.49287	5e-05	0.000394466	yes	0.908599	6.53509	5e-05	0.000394466	yes	TRUE
ENSG00000080493	0.857273	6.69666	5e-05	0.000394466	yes	1.04874	8.25849	5e-05	0.000394466	yes	TRUE
ENSG00000080561	0.55555	2.78809	5e-05	0.000394466	yes	0.668917	3.40758	5e-05	0.000394466	yes	TRUE
ENSG00000080824	-0.279437	-2.05414	5e-05	0.000394466	yes	0.3083	2.32327	5e-05	0.000394466	yes	FALSE
ENSG00000081138	-0.734442	-2.20974	0.0004	0.00256373	yes	-0.645161	-1.87815	0.0014	0.00756525	yes	FALSE
ENSG00000081189	2.18141	4.62775	5e-05	0.000394466	yes	2.04994	4.05758	5e-05	0.000394466	yes	FALSE
ENSG00000081320	-0.502237	-2.84593	5e-05	0.000394466	yes	-0.83878	-4.99222	5e-05	0.000394466	yes	TRUE
ENSG00000081665	-0.301771	-1.9656	0.00065	0.00390953	yes	-0.552986	-3.19535	5e-05	0.000394466	yes	FALSE
ENSG00000081721	-0.259025	-2.34936	0.0001	0.000748217	yes	-0.320665	-2.96005	5e-05	0.000394466	yes	FALSE
ENSG00000081803	2.33977	18.843	5e-05	0.000394466	yes	1.0877	8.50717	5e-05	0.000394466	yes	TRUE
ENSG00000082438	1.00888	4.63346	5e-05	0.000394466	yes	0.334638	1.42289	0.01215	0.0459257	yes	TRUE
ENSG00000082512	-0.663141	-3.24403	5e-05	0.000394466	yes	-0.516455	-2.47689	5e-05	0.000394466	yes	FALSE
ENSG00000082556	0.760426	3.19254	5e-05	0.000394466	yes	-0.65641	-1.83072	0.0012	0.00663203	yes	FALSE
ENSG00000082701	0.389951	1.83935	0.00155	0.00824944	yes	0.418891	2.00059	0.00085	0.00494128	yes	TRUE
ENSG00000082781	-0.45241	-2.30548	5e-05	0.000394466	yes	-0.55613	-2.79061	5e-05	0.000394466	yes	TRUE
ENSG00000082805	1.19315	3.1677	5e-05	0.000394466	yes	2.20748	6.26625	5e-05	0.000394466	yes	TRUE
ENSG00000083123	-0.3147	-1.86835	0.00085	0.00494128	yes	-0.578839	-3.41133	5e-05	0.000394466	yes	TRUE
ENSG00000083290	-0.417273	-1.6879	0.0021	0.0106535	yes	-0.603671	-2.75786	5e-05	0.000394466	yes	TRUE
ENSG00000083444	0.344259	2.45665	5e-05	0.000394466	yes	0.273231	1.93726	0.0006	0.00365163	yes	FALSE
ENSG00000083720	-2.10538	-11.9212	5e-05	0.000394466	yes	-3.80472	-21.4725	5e-05	0.000394466	yes	TRUE
ENSG00000083799	0.438105	2.18262	0.0001	0.000748217	yes	0.639449	3.15183	5e-05	0.000394466	yes	TRUE
ENSG00000083844	0.200206	1.47447	0.00915	0.0364309	yes	0.303388	2.11406	0.0001	0.000748217	yes	TRUE
ENSG00000084073	0.545041	4.39268	5e-05	0.000394466	yes	0.273086	2.2079	5e-05	0.000394466	yes	TRUE
ENSG00000084234	0.328253	2.53187	5e-05	0.000394466	yes	0.231218	1.78169	0.00095	0.00542971	yes	TRUE
ENSG00000084652	-0.266863	-2.24714	5e-05	0.000394466	yes	0.208456	1.75767	0.00215	0.0108713	yes	TRUE
ENSG00000084710	-0.489654	-1.65825	0.0021	0.0106535	yes	-0.720871	-2.18121	5e-05	0.000394466	yes	FALSE
ENSG00000084733	0.415916	2.36294	5e-05	0.000394466	yes	0.453655	2.56111	5e-05	0.000394466	yes	TRUE
ENSG00000084764	0.399412	1.77758	0.00125	0.0068727	yes	0.393537	1.83074	0.00115	0.00640105	yes	FALSE
ENSG00000085063	0.278848	1.89221	0.00075	0.00442828	yes	0.242566	1.69003	0.0025	0.0123557	yes	TRUE
ENSG00000085377	0.48126	3.84756	5e-05	0.000394466	yes	-0.2109	-1.76029	0.00265	0.0129582	yes	TRUE
ENSG00000085552	-0.655963	-5.57344	5e-05	0.000394466	yes	-0.473192	-4.1061	5e-05	0.000394466	yes	TRUE
ENSG00000085831	0.465484	3.37556	5e-05	0.000394466	yes	0.426907	3.06667	5e-05	0.000394466	yes	TRUE
ENSG00000085840	-1.06326	-9.45899	5e-05	0.000394466	yes	-0.349425	-3.28435	5e-05	0.000394466	yes	FALSE
ENSG00000085982	-0.453963	-1.92755	0.0009	0.00518136	yes	-0.532963	-2.5093	5e-05	0.000394466	yes	TRUE
ENSG00000086619	0.318842	1.56441	0.007	0.029217	yes	-0.587846	-2.33575	0.0001	0.000748217	yes	TRUE
ENSG00000087008	0.252118	1.59979	0.00515	0.0225883	yes	0.377342	1.95592	0.0009	0.00518136	yes	TRUE
ENSG00000087074	0.489803	3.56856	5e-05	0.000394466	yes	-0.291945	-2.03682	0.00025	0.00169574	yes	FALSE
ENSG00000087274	0.240372	1.43164	0.0075	0.0308919	yes	0.308504	1.92804	0.0004	0.00256373	yes	TRUE
ENSG00000087502	0.452095	2.61128	5e-05	0.000394466	yes	0.616607	3.49898	5e-05	0.000394466	yes	FALSE
ENSG00000087586	-0.342624	-2.52913	5e-05	0.000394466	yes	0.593595	4.41891	5e-05	0.000394466	yes	FALSE
ENSG00000088002	0.612041	2.54629	0.0001	0.000748217	yes	-0.867886	-2.6926	5e-05	0.000394466	yes	FALSE
ENSG00000088305	-0.259345	-2.28703	5e-05	0.000394466	yes	0.259323	2.32354	5e-05	0.000394466	yes	FALSE
ENSG00000088356	0.460893	3.71515	5e-05	0.000394466	yes	0.634434	5.13199	5e-05	0.000394466	yes	FALSE
ENSG00000088448	-0.368469	-2.0725	0.00035	0.00228343	yes	-0.278304	-1.52449	0.0089	0.0355916	yes	TRUE
ENSG00000088832	0.599945	4.11777	5e-05	0.000394466	yes	0.616524	4.24563	5e-05	0.000394466	yes	TRUE
ENSG00000089091	0.86002	1.94108	0.00085	0.00494128	yes	1.09284	2.61871	5e-05	0.000394466	yes	FALSE
ENSG00000089159	0.337478	1.62651	0.0043	0.0194374	yes	0.535401	2.57364	5e-05	0.000394466	yes	TRUE
ENSG00000089327	0.448405	1.76266	0.0015	0.00802265	yes	-0.711662	-2.17636	5e-05	0.000394466	yes	FALSE
ENSG00000089486	-0.32187	-2.5396	5e-05	0.000394466	yes	-0.673834	-5.28434	5e-05	0.000394466	yes	TRUE
ENSG00000089818	0.559391	4.22723	5e-05	0.000394466	yes	0.376411	2.7871	5e-05	0.000394466	yes	TRUE
ENSG00000090054	-0.4413	-3.17975	5e-05	0.000394466	yes	-0.458447	-3.38552	5e-05	0.000394466	yes	TRUE
ENSG00000090238	0.558149	2.68437	5e-05	0.000394466	yes	0.301658	1.50819	0.0081	0.0329491	yes	FALSE
ENSG00000090432	-0.170235	-1.46157	0.01035	0.0402227	yes	0.238579	2.11351	0.00025	0.00169574	yes	FALSE
ENSG00000090447	-0.448525	-2.33777	5e-05	0.000394466	yes	-0.281684	-1.58304	0.0062	0.0263992	yes	TRUE
ENSG00000090615	0.475987	1.33999	0.00425	0.0192412	yes	0.651025	1.84328	0.0007	0.00417041	yes	TRUE
ENSG00000090661	0.391169	3.03765	5e-05	0.000394466	yes	0.358029	2.75106	5e-05	0.000394466	yes	FALSE
ENSG00000090889	-1.20815	-5.78011	5e-05	0.000394466	yes	-1.05836	-5.27716	5e-05	0.000394466	yes	FALSE
ENSG00000090905	0.364683	1.25573	0.00895	0.0357555	yes	0.431322	1.4164	0.01165	0.0443902	yes	TRUE
ENSG00000091262	0.432196	1.87757	0.0013	0.00709758	yes	0.376609	1.60681	0.00565	0.0244483	yes	FALSE
ENSG00000091436	-0.821689	-5.57097	5e-05	0.000394466	yes	-0.426131	-2.94026	5e-05	0.000394466	yes	TRUE
ENSG00000091986	1.18226	2.64556	0.00015	0.00108114	yes	1.63719	3.42665	5e-05	0.000394466	yes	FALSE
ENSG00000092036	-0.292973	-1.44011	0.01285	0.0480534	yes	-0.538321	-2.70487	5e-05	0.000394466	yes	FALSE
ENSG00000092108	0.378868	2.57756	5e-05	0.000394466	yes	0.338463	2.17722	0.00015	0.00108114	yes	TRUE
ENSG00000092208	-0.299793	-2.37511	5e-05	0.000394466	yes	-0.215827	-1.71551	0.00315	0.0150018	yes	FALSE
ENSG00000092377	-0.314802	-1.72201	0.0027	0.0131678	yes	-0.459809	-2.42027	5e-05	0.000394466	yes	TRUE
ENSG00000092621	-0.356553	-3.0091	5e-05	0.000394466	yes	-1.02618	-8.60249	5e-05	0.000394466	yes	TRUE
ENSG00000092820	0.298228	2.42694	5e-05	0.000394466	yes	0.486175	3.93966	5e-05	0.000394466	yes	FALSE
ENSG00000092847	0.312309	2.07219	0.00025	0.00169574	yes	0.561488	3.72922	5e-05	0.000394466	yes	FALSE
ENSG00000092964	0.237441	1.61756	0.00525	0.0229379	yes	-0.355803	-2.43946	5e-05	0.000394466	yes	FALSE
ENSG00000093009	-0.715659	-5.5507	5e-05	0.000394466	yes	-0.237089	-1.81069	0.0018	0.00935173	yes	FALSE
ENSG00000094631	-0.367439	-1.72778	0.00225	0.0113068	yes	-0.529772	-2.40263	5e-05	0.000394466	yes	TRUE
ENSG00000094804	-0.636417	-3.30976	5e-05	0.000394466	yes	-0.472838	-2.37212	5e-05	0.000394466	yes	FALSE
ENSG00000095203	-0.322191	-2.66743	5e-05	0.000394466	yes	0.481966	4.02838	5e-05	0.000394466	yes	TRUE
ENSG00000095303	0.855956	2.03721	0.0005	0.00312122	yes	1.58913	3.9204	5e-05	0.000394466	yes	FALSE
ENSG00000095739	0.564986	4.75943	5e-05	0.000394466	yes	0.693117	5.85881	5e-05	0.000394466	yes	TRUE
ENSG00000096060	-0.308033	-2.34109	0.0001	0.000748217	yes	0.351736	2.708	5e-05	0.000394466	yes	TRUE
ENSG00000096384	0.168605	1.44185	0.01015	0.0395871	yes	0.557379	4.76282	5e-05	0.000394466	yes	TRUE
ENSG00000097033	0.228269	1.73093	0.00225	0.0113068	yes	0.277105	1.91509	0.00115	0.00640105	yes	FALSE
ENSG00000097096	-0.247509	-1.68154	0.00385	0.0177672	yes	-1.06124	-6.59902	5e-05	0.000394466	yes	FALSE
ENSG00000099194	0.713514	5.7371	5e-05	0.000394466	yes	0.550817	4.43361	5e-05	0.000394466	yes	FALSE
ENSG00000099246	0.533905	3.49353	5e-05	0.000394466	yes	0.316907	2.08046	0.00015	0.00108114	yes	FALSE
ENSG00000099260	0.972164	7.1323	5e-05	0.000394466	yes	0.32215	2.33879	5e-05	0.000394466	yes	FALSE
ENSG00000099385	-0.271809	-2.07393	0.0005	0.00312122	yes	-0.436291	-3.2895	5e-05	0.000394466	yes	FALSE
ENSG00000099715	2.30291	4.93681	5e-05	0.000394466	yes	3.69387	9.12204	5e-05	0.000394466	yes	FALSE
ENSG00000099783	-1.62962	-11.6654	5e-05	0.000394466	yes	-2.27455	-15.707	5e-05	0.000394466	yes	TRUE
ENSG00000099804	0.306325	2.39444	0.0001	0.000748217	yes	0.372027	2.51292	5e-05	0.000394466	yes	FALSE
ENSG00000099810	-0.507806	-2.63853	5e-05	0.000394466	yes	-0.510599	-2.62077	5e-05	0.000394466	yes	TRUE
ENSG00000099814	-0.313044	-2.22268	0.00015	0.00108114	yes	0.246275	1.80634	0.00245	0.0121508	yes	TRUE
ENSG00000099917	0.661492	3.17106	5e-05	0.000394466	yes	0.979275	4.57407	5e-05	0.000394466	yes	TRUE
ENSG00000099992	0.371681	1.85844	0.00135	0.00733226	yes	0.366015	1.97061	0.00075	0.00442828	yes	FALSE
ENSG00000100014	0.480973	3.44447	5e-05	0.000394466	yes	0.527547	3.76484	5e-05	0.000394466	yes	TRUE
ENSG00000100058	-0.618922	-3.79551	5e-05	0.000394466	yes	-0.664716	-4.20494	5e-05	0.000394466	yes	TRUE
ENSG00000100078	0.463957	3.55049	5e-05	0.000394466	yes	1.14631	9.20203	5e-05	0.000394466	yes	FALSE
ENSG00000100106	-1.25037	-5.30071	5e-05	0.000394466	yes	-0.337826	-1.66857	0.0029	0.0139832	yes	TRUE
ENSG00000100116	0.303616	2.38578	5e-05	0.000394466	yes	0.446163	3.49637	5e-05	0.000394466	yes	FALSE
ENSG00000100147	0.272606	2.03282	0.0002	0.00139451	yes	0.655711	5.05163	5e-05	0.000394466	yes	FALSE
ENSG00000100162	-0.664765	-5.77967	5e-05	0.000394466	yes	-0.688649	-5.93035	5e-05	0.000394466	yes	TRUE
ENSG00000100211	-0.356235	-2.83006	5e-05	0.000394466	yes	0.228774	1.67858	0.0039	0.0179486	yes	TRUE
ENSG00000100243	-0.950609	-7.94668	5e-05	0.000394466	yes	0.290299	2.69186	5e-05	0.000394466	yes	FALSE
ENSG00000100271	-0.473676	-3.47682	5e-05	0.000394466	yes	-1.2318	-8.44042	5e-05	0.000394466	yes	FALSE
ENSG00000100280	0.501245	3.859	5e-05	0.000394466	yes	0.373093	2.89948	5e-05	0.000394466	yes	TRUE
ENSG00000100290	0.528798	4.50449	5e-05	0.000394466	yes	0.533337	4.54338	5e-05	0.000394466	yes	TRUE
ENSG00000100292	0.334944	2.49739	5e-05	0.000394466	yes	2.57218	19.6527	5e-05	0.000394466	yes	FALSE
ENSG00000100345	0.215553	1.21562	0.00265	0.0129582	yes	0.409944	2.29966	5e-05	0.000394466	yes	TRUE
ENSG00000100401	-0.212579	-1.54473	0.00645	0.0273313	yes	0.199387	1.50443	0.00915	0.0364309	yes	TRUE
ENSG00000100412	-0.461941	-2.61868	5e-05	0.000394466	yes	-0.80353	-4.26503	5e-05	0.000394466	yes	TRUE
ENSG00000100417	0.211317	1.86815	0.00095	0.00542971	yes	-0.452617	-3.80219	5e-05	0.000394466	yes	FALSE
ENSG00000100422	0.552995	3.17132	5e-05	0.000394466	yes	-1.12833	-4.48806	5e-05	0.000394466	yes	FALSE
ENSG00000100426	-0.787971	-6.47135	5e-05	0.000394466	yes	-0.363753	-3.01044	5e-05	0.000394466	yes	TRUE
ENSG00000100439	0.379554	2.50289	5e-05	0.000394466	yes	0.246023	1.51346	0.00505	0.0222042	yes	FALSE
ENSG00000100483	-0.290194	-1.91181	0.0006	0.00365163	yes	-0.310105	-2.0874	0.0001	0.000748217	yes	TRUE
ENSG00000100526	-0.322901	-3.00625	5e-05	0.000394466	yes	-0.219085	-2.07415	0.00025	0.00169574	yes	TRUE
ENSG00000100532	0.402155	2.43398	5e-05	0.000394466	yes	0.319717	2.21368	0.0001	0.000748217	yes	FALSE
ENSG00000100600	0.613179	4.80163	5e-05	0.000394466	yes	0.407064	3.1457	5e-05	0.000394466	yes	TRUE
ENSG00000100614	-0.247438	-1.54797	0.00825	0.0334634	yes	0.265877	1.67893	0.00415	0.0188795	yes	TRUE
ENSG00000100697	0.460989	1.70372	0.0029	0.0139832	yes	0.729828	2.70103	5e-05	0.000394466	yes	TRUE
ENSG00000100764	0.210162	1.48038	0.0109	0.0420474	yes	0.253885	1.80995	0.0017	0.00891245	yes	TRUE
ENSG00000100802	-0.538564	-2.52401	5e-05	0.000394466	yes	-1.1958	-4.02551	5e-05	0.000394466	yes	FALSE
ENSG00000100814	-0.701906	-4.39789	5e-05	0.000394466	yes	-0.462312	-2.91753	5e-05	0.000394466	yes	TRUE
ENSG00000100823	-0.188683	-1.48043	0.009	0.0359267	yes	-0.209749	-1.65529	0.004	0.0183221	yes	FALSE
ENSG00000100852	0.586108	4.48169	5e-05	0.000394466	yes	1.20659	8.87976	5e-05	0.000394466	yes	TRUE
ENSG00000100865	-0.270141	-1.57722	0.0058	0.0249997	yes	0.317739	1.92318	0.0008	0.00468454	yes	FALSE
ENSG00000100867	0.220846	1.49284	0.00705	0.0293726	yes	-1.22035	-5.9376	5e-05	0.000394466	yes	FALSE
ENSG00000100883	0.365092	2.55028	5e-05	0.000394466	yes	0.221088	1.53095	0.0075	0.0308919	yes	FALSE
ENSG00000100889	-0.782726	-4.19623	5e-05	0.000394466	yes	-1.86117	-8.67506	5e-05	0.000394466	yes	FALSE
ENSG00000100934	0.340016	1.97542	0.0005	0.00312122	yes	0.250803	1.48244	0.0082	0.0332948	yes	FALSE
ENSG00000100938	-0.81369	-1.96651	0.00035	0.00228343	yes	-1.18054	-2.59851	5e-05	0.000394466	yes	TRUE
ENSG00000101019	-0.592428	-2.73274	5e-05	0.000394466	yes	-0.367566	-1.61905	0.00285	0.0137829	yes	TRUE
ENSG00000101049	0.896454	1.04589	0.0091	0.0362684	yes	2.03262	2.65146	5e-05	0.000394466	yes	TRUE
ENSG00000101057	-1.00444	-8.88249	5e-05	0.000394466	yes	-0.47809	-3.86852	5e-05	0.000394466	yes	TRUE
ENSG00000101115	2.79624	3.24328	5e-05	0.000394466	yes	2.77434	3.16405	5e-05	0.000394466	yes	FALSE
ENSG00000101160	0.398749	3.26644	5e-05	0.000394466	yes	0.181928	1.48307	0.01025	0.0399069	yes	TRUE
ENSG00000101224	-0.514602	-3.63729	5e-05	0.000394466	yes	0.305227	2.42083	5e-05	0.000394466	yes	FALSE
ENSG00000101255	-0.391913	-3.22479	5e-05	0.000394466	yes	-1.14167	-9.34829	5e-05	0.000394466	yes	FALSE
ENSG00000101265	-0.511841	-4.89773	5e-05	0.000394466	yes	-0.284098	-2.74489	5e-05	0.000394466	yes	TRUE
ENSG00000101276	0.504959	2.03213	0.0003	0.00199267	yes	1.13605	4.79839	5e-05	0.000394466	yes	FALSE
ENSG00000101311	-0.380237	-2.50829	0.00015	0.00108114	yes	-0.713758	-4.15798	5e-05	0.000394466	yes	FALSE
ENSG00000101337	-0.788716	-5.06931	5e-05	0.000394466	yes	-0.971762	-5.75177	5e-05	0.000394466	yes	TRUE
ENSG00000101350	0.171151	1.41883	0.01225	0.0462091	yes	0.258141	2.11268	0.00015	0.00108114	yes	TRUE
ENSG00000101363	-0.736634	-6.70138	5e-05	0.000394466	yes	-1.34672	-11.3032	5e-05	0.000394466	yes	TRUE
ENSG00000101365	0.187639	1.45395	0.01125	0.043166	yes	0.42778	3.31029	5e-05	0.000394466	yes	FALSE
ENSG00000101367	0.283673	2.37214	5e-05	0.000394466	yes	0.684934	5.74738	5e-05	0.000394466	yes	TRUE
ENSG00000101412	-0.933064	-8.17346	5e-05	0.000394466	yes	-0.232219	-1.87544	0.0017	0.00891245	yes	FALSE
ENSG00000101473	0.294637	2.05033	0.0003	0.00199267	yes	-0.518886	-3.29848	5e-05	0.000394466	yes	FALSE
ENSG00000101639	0.450482	2.6854	5e-05	0.000394466	yes	0.815604	5.11291	5e-05	0.000394466	yes	TRUE
ENSG00000101773	-0.588474	-3.01644	5e-05	0.000394466	yes	-0.291877	-1.46536	0.0114	0.0436207	yes	FALSE
ENSG00000101844	0.251504	1.99403	0.0003	0.00199267	yes	0.374299	2.98199	5e-05	0.000394466	yes	FALSE
ENSG00000101871	1.39953	1.93452	0.00045	0.00285055	yes	1.45141	2.09714	0.0003	0.00199267	yes	FALSE
ENSG00000101911	-0.277938	-2.13878	0.0002	0.00139451	yes	-0.248166	-1.97717	0.0004	0.00256373	yes	TRUE
ENSG00000102043	-0.55101	-1.45192	0.00585	0.0251702	yes	-0.689679	-1.55087	0.0049	0.0216772	yes	FALSE
ENSG00000102098	-1.00392	-7.15295	5e-05	0.000394466	yes	-0.450217	-3.11462	5e-05	0.000394466	yes	TRUE
ENSG00000102144	0.459766	3.4069	5e-05	0.000394466	yes	0.204584	1.51877	0.0078	0.0318998	yes	TRUE
ENSG00000102181	-0.384189	-1.96041	0.00135	0.00733226	yes	-0.735797	-3.43185	5e-05	0.000394466	yes	TRUE
ENSG00000102218	0.19244	1.85452	0.00175	0.0091262	yes	0.22547	2.17667	0.0002	0.00139451	yes	FALSE
ENSG00000102383	-0.735328	-1.73346	0.00355	0.0166083	yes	-1.05861	-1.83869	0.0053	0.0231253	yes	FALSE
ENSG00000102401	0.216385	1.49239	0.01	0.039115	yes	0.2985	2.03202	0.0005	0.00312122	yes	FALSE
ENSG00000102409	0.315093	2.71001	5e-05	0.000394466	yes	-0.268281	-2.19602	5e-05	0.000394466	yes	FALSE
ENSG00000102531	0.255465	1.92729	0.00085	0.00494128	yes	-0.290877	-2.08482	0.0003	0.00199267	yes	TRUE
ENSG00000102547	0.772696	4.28386	5e-05	0.000394466	yes	0.490818	2.73402	5e-05	0.000394466	yes	TRUE
ENSG00000102572	-0.444899	-2.59596	5e-05	0.000394466	yes	-0.247385	-1.46789	0.0097	0.0381979	yes	TRUE
ENSG00000102580	0.215046	1.74779	0.00285	0.0137829	yes	0.416507	3.37241	5e-05	0.000394466	yes	TRUE
ENSG00000102743	-0.388696	-3.48152	5e-05	0.000394466	yes	-0.372838	-3.32797	5e-05	0.000394466	yes	TRUE
ENSG00000102753	0.201325	1.90821	0.0009	0.00518136	yes	0.424451	3.72495	5e-05	0.000394466	yes	TRUE
ENSG00000102780	0.305889	1.75845	0.0024	0.0119296	yes	0.321819	1.93415	0.00065	0.00390953	yes	TRUE
ENSG00000102804	0.341573	2.66266	5e-05	0.000394466	yes	0.468622	3.68495	5e-05	0.000394466	yes	TRUE
ENSG00000102900	-0.349465	-1.99601	0.0004	0.00256373	yes	-0.359562	-1.99363	0.00045	0.00285055	yes	TRUE
ENSG00000102910	0.535099	3.17755	5e-05	0.000394466	yes	0.29778	1.74927	0.00265	0.0129582	yes	FALSE
ENSG00000102996	0.299265	2.00849	0.0002	0.00139451	yes	0.628347	4.38817	5e-05	0.000394466	yes	FALSE
ENSG00000103196	-0.367884	-1.68419	0.0047	0.0209396	yes	-1.16382	-5.67359	5e-05	0.000394466	yes	TRUE
ENSG00000103226	0.473458	2.05571	0.0003	0.00199267	yes	0.364822	1.44758	0.0095	0.0376082	yes	FALSE
ENSG00000103257	-1.11154	-5.44668	5e-05	0.000394466	yes	-1.81621	-8.16004	5e-05	0.000394466	yes	FALSE
ENSG00000103269	-1.71889	-3.44404	5e-05	0.000394466	yes	-2.85518	-3.67396	5e-05	0.000394466	yes	FALSE
ENSG00000103326	-0.300534	-2.04301	0.0004	0.00256373	yes	0.614283	3.66259	5e-05	0.000394466	yes	TRUE
ENSG00000103485	1.11245	1.76798	0.00165	0.00869476	yes	1.76718	3.0879	5e-05	0.000394466	yes	FALSE
ENSG00000103549	0.560212	2.36386	5e-05	0.000394466	yes	0.681997	2.83383	5e-05	0.000394466	yes	TRUE
ENSG00000103876	-0.25323	-1.78922	0.00145	0.00779664	yes	-0.395538	-2.92092	5e-05	0.000394466	yes	TRUE
ENSG00000104140	0.238152	2.20369	5e-05	0.000394466	yes	0.23926	2.21423	5e-05	0.000394466	yes	FALSE
ENSG00000104142	0.182668	1.43315	0.01085	0.0418866	yes	0.266455	2.08794	0.00015	0.00108114	yes	FALSE
ENSG00000104231	-0.243852	-1.55457	0.00665	0.0280372	yes	-0.769745	-4.86398	5e-05	0.000394466	yes	TRUE
ENSG00000104325	-0.43997	-1.74412	0.0023	0.0115225	yes	-0.7826	-2.89691	5e-05	0.000394466	yes	FALSE
ENSG00000104332	-0.379726	-2.71794	5e-05	0.000394466	yes	-0.960888	-6.03104	5e-05	0.000394466	yes	FALSE
ENSG00000104368	1.78469	2.223	5e-05	0.000394466	yes	3.02673	3.99371	5e-05	0.000394466	yes	FALSE
ENSG00000104375	0.422488	2.31376	0.00015	0.00108114	yes	0.386675	2.10248	0.00035	0.00228343	yes	TRUE
ENSG00000104419	0.992002	5.6271	5e-05	0.000394466	yes	0.260598	1.4297	0.00935	0.0371045	yes	TRUE
ENSG00000104427	-0.67617	-3.04784	5e-05	0.000394466	yes	-0.521768	-2.45485	5e-05	0.000394466	yes	FALSE
ENSG00000104490	1.79646	0.874177	5e-05	0.000394466	yes	1.65142	0.808975	5e-05	0.000394466	yes	TRUE
ENSG00000104549	0.212393	1.67119	0.0029	0.0139832	yes	0.538888	4.19823	5e-05	0.000394466	yes	TRUE
ENSG00000104635	-0.70127	-4.7584	5e-05	0.000394466	yes	0.383278	2.65021	5e-05	0.000394466	yes	TRUE
ENSG00000104714	-0.588792	-3.31006	5e-05	0.000394466	yes	-0.598243	-3.29635	5e-05	0.000394466	yes	TRUE
ENSG00000104728	-0.918397	-6.16333	5e-05	0.000394466	yes	-1.36756	-7.77336	5e-05	0.000394466	yes	TRUE
ENSG00000104760	0.498905	3.31096	5e-05	0.000394466	yes	0.213817	1.42003	0.00915	0.0364309	yes	FALSE
ENSG00000104763	0.379995	2.61235	0.0001	0.000748217	yes	0.368883	2.50454	0.00015	0.00108114	yes	FALSE
ENSG00000105011	-1.18328	-8.43529	5e-05	0.000394466	yes	-0.176216	-1.40309	0.0133	0.0493927	yes	FALSE
ENSG00000105048	0.223724	1.61505	0.0039	0.0179486	yes	-0.687055	-4.51245	5e-05	0.000394466	yes	FALSE
ENSG00000105063	0.229931	1.55724	0.0067	0.0282137	yes	0.649461	4.4425	5e-05	0.000394466	yes	TRUE
ENSG00000105173	-0.513018	-3.61937	5e-05	0.000394466	yes	-0.944556	-5.69142	5e-05	0.000394466	yes	FALSE
ENSG00000105202	-0.412516	-3.22311	5e-05	0.000394466	yes	0.19278	1.49098	0.00995	0.0389552	yes	TRUE
ENSG00000105281	-0.488942	-3.30173	5e-05	0.000394466	yes	-1.02852	-6.67572	5e-05	0.000394466	yes	FALSE
ENSG00000105290	0.418138	2.2937	5e-05	0.000394466	yes	-0.296186	-1.47764	0.00945	0.037437	yes	FALSE
ENSG00000105355	-0.526283	-3.87422	5e-05	0.000394466	yes	0.253455	1.64177	0.00365	0.0170029	yes	FALSE
ENSG00000105429	-0.373231	-1.28454	0.01025	0.0399069	yes	-0.922354	-2.6709	5e-05	0.000394466	yes	FALSE
ENSG00000105486	-0.543696	-2.95348	5e-05	0.000394466	yes	-0.399895	-1.74245	0.0032	0.0151942	yes	FALSE
ENSG00000105520	0.319405	2.46603	5e-05	0.000394466	yes	0.261879	2.0499	0.00065	0.00390953	yes	TRUE
ENSG00000105550	-0.932718	-1.74202	0.0046	0.0205619	yes	-2.74652	-2.76512	5e-05	0.000394466	yes	FALSE
ENSG00000105707	0.235263	1.62851	0.0045	0.0201898	yes	0.217815	1.52486	0.0075	0.0308919	yes	TRUE
ENSG00000105750	-0.560622	-2.44763	5e-05	0.000394466	yes	-0.771156	-4.03458	5e-05	0.000394466	yes	FALSE
ENSG00000105755	-0.323923	-2.76394	5e-05	0.000394466	yes	-0.48891	-4.10329	5e-05	0.000394466	yes	FALSE
ENSG00000105849	-0.470958	-2.32637	5e-05	0.000394466	yes	-0.592133	-3.51292	5e-05	0.000394466	yes	FALSE
ENSG00000105875	0.598588	2.52068	5e-05	0.000394466	yes	0.440788	2.1047	0.00035	0.00228343	yes	TRUE
ENSG00000105963	0.706675	2.39472	5e-05	0.000394466	yes	0.466032	1.54058	0.0047	0.0209396	yes	TRUE
ENSG00000105976	-0.850404	-3.61871	5e-05	0.000394466	yes	-1.03693	-3.7795	5e-05	0.000394466	yes	FALSE
ENSG00000105991	1.37347	4.16062	5e-05	0.000394466	yes	0.85612	2.38857	5e-05	0.000394466	yes	FALSE
ENSG00000106006	-1.7778	-2.37377	0.00065	0.00390953	yes	-0.971362	-1.81918	0.0044	0.0198021	yes	FALSE
ENSG00000106025	0.766922	3.17849	5e-05	0.000394466	yes	-0.726874	-2.52345	5e-05	0.000394466	yes	FALSE
ENSG00000106052	0.365497	2.86069	5e-05	0.000394466	yes	0.268767	2.09493	0.00025	0.00169574	yes	TRUE
ENSG00000106086	-0.273374	-1.81276	0.0018	0.00935173	yes	0.389096	2.37148	5e-05	0.000394466	yes	FALSE
ENSG00000106105	-0.818917	-4.94129	5e-05	0.000394466	yes	-1.12099	-6.44074	5e-05	0.000394466	yes	TRUE
ENSG00000106236	-0.384144	-1.57207	0.0066	0.0278561	yes	-0.761381	-2.99262	5e-05	0.000394466	yes	FALSE
ENSG00000106268	-0.611359	-5.05475	5e-05	0.000394466	yes	-0.353081	-3.02274	5e-05	0.000394466	yes	TRUE
ENSG00000106346	0.189682	1.40336	0.01145	0.0437667	yes	0.439905	3.34229	5e-05	0.000394466	yes	TRUE
ENSG00000106348	-0.774403	-5.31753	5e-05	0.000394466	yes	0.682897	4.51848	5e-05	0.000394466	yes	FALSE
ENSG00000106399	-0.350444	-1.90047	0.0008	0.00468454	yes	-0.452187	-2.50424	5e-05	0.000394466	yes	TRUE
ENSG00000106462	-0.752742	-5.75954	5e-05	0.000394466	yes	-0.514076	-3.57935	5e-05	0.000394466	yes	TRUE
ENSG00000106477	-0.772717	-3.97861	5e-05	0.000394466	yes	-0.88004	-4.44631	5e-05	0.000394466	yes	FALSE
ENSG00000106484	-0.268669	-1.63294	0.00345	0.0162172	yes	0.230793	1.51861	0.00705	0.0293726	yes	TRUE
ENSG00000106541	0.538008	4.16972	5e-05	0.000394466	yes	1.37964	10.7849	5e-05	0.000394466	yes	FALSE
ENSG00000106683	-0.750661	-5.83837	5e-05	0.000394466	yes	0.457323	3.6601	5e-05	0.000394466	yes	FALSE
ENSG00000106733	0.229483	1.88852	0.0009	0.00518136	yes	-0.329042	-2.56455	5e-05	0.000394466	yes	FALSE
ENSG00000106771	0.285529	1.84053	0.001	0.00567333	yes	0.310496	2.02003	0.00015	0.00108114	yes	TRUE
ENSG00000106804	-1.61997	-1.73589	0.0001	0.000748217	yes	-1.17804	-1.40465	0.0047	0.0209396	yes	FALSE
ENSG00000106948	-0.570488	-2.06517	0.0002	0.00139451	yes	-0.442667	-1.65329	0.0019	0.00979865	yes	TRUE
ENSG00000106993	0.237173	1.57148	0.00605	0.0258719	yes	0.262074	1.72076	0.0024	0.0119296	yes	TRUE
ENSG00000107105	-1.09794	-2.33562	5e-05	0.000394466	yes	-0.989808	-1.86864	0.00355	0.0166083	yes	FALSE
ENSG00000107165	3.06777	2.72376	5e-05	0.000394466	yes	2.02673	1.7195	0.0001	0.000748217	yes	FALSE
ENSG00000107566	-1.25404	-3.58862	5e-05	0.000394466	yes	-1.39207	-3.75392	5e-05	0.000394466	yes	TRUE
ENSG00000107614	-0.435341	-1.8434	0.00045	0.00285055	yes	-0.929888	-3.54288	5e-05	0.000394466	yes	TRUE
ENSG00000107719	-0.448242	-3.14925	5e-05	0.000394466	yes	-0.288442	-2.09331	0.0001	0.000748217	yes	FALSE
ENSG00000107789	0.441928	3.85362	5e-05	0.000394466	yes	0.454452	4.25074	5e-05	0.000394466	yes	FALSE
ENSG00000107821	-0.541779	-3.19048	5e-05	0.000394466	yes	-0.726824	-4.09443	5e-05	0.000394466	yes	FALSE
ENSG00000107829	-0.482846	-3.01132	5e-05	0.000394466	yes	-0.840875	-4.63518	5e-05	0.000394466	yes	TRUE
ENSG00000107833	-0.326012	-2.31369	5e-05	0.000394466	yes	0.362065	2.58903	5e-05	0.000394466	yes	TRUE
ENSG00000107949	0.220872	1.43971	0.0126	0.0472942	yes	0.363184	2.39463	0.0001	0.000748217	yes	TRUE
ENSG00000107957	0.419204	1.39731	0.0121	0.0457679	yes	0.715752	2.83344	5e-05	0.000394466	yes	FALSE
ENSG00000108091	-0.261571	-1.91169	0.0011	0.00616363	yes	0.288629	2.12664	0.00025	0.00169574	yes	TRUE
ENSG00000108176	0.479474	3.95755	5e-05	0.000394466	yes	0.198093	1.61095	0.00555	0.0240664	yes	FALSE
ENSG00000108179	-0.302029	-2.23341	5e-05	0.000394466	yes	0.222046	1.63954	0.0044	0.0198021	yes	TRUE
ENSG00000108272	-0.37563	-1.96495	0.0009	0.00518136	yes	-0.525661	-2.9866	5e-05	0.000394466	yes	FALSE
ENSG00000108379	0.59544	3.62091	5e-05	0.000394466	yes	0.348183	2.00346	0.0004	0.00256373	yes	TRUE
ENSG00000108433	0.231685	1.43516	0.0119	0.0451471	yes	0.346737	2.16876	5e-05	0.000394466	yes	TRUE
ENSG00000108479	0.284737	2.24738	0.00015	0.00108114	yes	-0.391475	-3.26102	5e-05	0.000394466	yes	FALSE
ENSG00000108523	0.479333	2.02969	0.0004	0.00256373	yes	0.541558	2.27504	0.0001	0.000748217	yes	FALSE
ENSG00000108588	0.241805	1.39841	0.01295	0.0483556	yes	0.242933	1.39185	0.0134	0.0496941	yes	FALSE
ENSG00000108641	-0.303321	-1.53331	0.00595	0.0255172	yes	-0.54709	-2.51791	5e-05	0.000394466	yes	TRUE
ENSG00000108679	0.531717	3.61048	5e-05	0.000394466	yes	0.772812	5.46075	5e-05	0.000394466	yes	FALSE
ENSG00000108788	0.44905	2.90128	5e-05	0.000394466	yes	0.362576	2.34256	5e-05	0.000394466	yes	FALSE
ENSG00000108861	0.279547	1.95228	0.00055	0.00339017	yes	0.331506	2.34301	5e-05	0.000394466	yes	FALSE
ENSG00000108947	0.28924	2.08086	0.00025	0.00169574	yes	-0.287572	-1.87352	0.00105	0.00591759	yes	FALSE
ENSG00000108961	-0.2838	-1.7746	0.003	0.0143914	yes	-0.450722	-3.09747	5e-05	0.000394466	yes	FALSE
ENSG00000108984	-0.341309	-2.3519	5e-05	0.000394466	yes	-0.357854	-2.09509	0.00035	0.00228343	yes	TRUE
ENSG00000109062	0.265981	1.75427	0.0026	0.0127622	yes	0.611861	4.14764	5e-05	0.000394466	yes	TRUE
ENSG00000109099	-0.581348	-1.12604	0.01125	0.043166	yes	-2.39958	-2.09551	5e-05	0.000394466	yes	FALSE
ENSG00000109107	0.706101	2.56217	5e-05	0.000394466	yes	0.661991	2.31615	5e-05	0.000394466	yes	FALSE
ENSG00000109181	-0.407283	-1.95672	0.0006	0.00365163	yes	0.509547	2.68933	5e-05	0.000394466	yes	FALSE
ENSG00000109184	-0.598142	-2.74845	5e-05	0.000394466	yes	-0.359661	-1.75744	0.00205	0.010441	yes	TRUE
ENSG00000109255	-0.60371	-4.45489	5e-05	0.000394466	yes	-0.529341	-3.91724	5e-05	0.000394466	yes	FALSE
ENSG00000109270	0.242189	1.67264	0.00345	0.0162172	yes	0.367064	2.57039	5e-05	0.000394466	yes	TRUE
ENSG00000109452	0.424075	2.12625	0.0002	0.00139451	yes	0.436618	2.31773	0.00015	0.00108114	yes	TRUE
ENSG00000109501	0.407375	2.3787	5e-05	0.000394466	yes	0.4867	3.04059	5e-05	0.000394466	yes	TRUE
ENSG00000109576	-0.43427	-3.16081	5e-05	0.000394466	yes	0.278437	2.0613	0.00055	0.00339017	yes	TRUE
ENSG00000109586	0.42741	2.82454	5e-05	0.000394466	yes	-0.362038	-2.45414	5e-05	0.000394466	yes	TRUE
ENSG00000109654	-0.318791	-1.79166	0.0016	0.00848051	yes	-0.426743	-2.4321	5e-05	0.000394466	yes	FALSE
ENSG00000109674	-0.9578	-7.43389	5e-05	0.000394466	yes	-0.722545	-5.41338	5e-05	0.000394466	yes	FALSE
ENSG00000109819	-0.919804	-1.47548	0.0021	0.0106535	yes	-1.61389	-2.63782	5e-05	0.000394466	yes	FALSE
ENSG00000109906	0.532738	3.34733	5e-05	0.000394466	yes	0.489616	2.93678	5e-05	0.000394466	yes	TRUE
ENSG00000110066	0.323898	2.04794	0.00035	0.00228343	yes	0.33364	2.0342	0.0001	0.000748217	yes	TRUE
ENSG00000110080	0.501226	3.48444	5e-05	0.000394466	yes	0.532965	3.84685	5e-05	0.000394466	yes	FALSE
ENSG00000110172	-0.271537	-1.66694	0.0035	0.016423	yes	0.313546	1.96651	0.0006	0.00365163	yes	TRUE
ENSG00000110328	0.216585	1.99866	0.0005	0.00312122	yes	0.207388	1.88454	0.0007	0.00417041	yes	TRUE
ENSG00000110330	0.379018	2.40254	5e-05	0.000394466	yes	0.535951	3.67902	5e-05	0.000394466	yes	TRUE
ENSG00000110400	-0.509873	-2.02776	0.00035	0.00228343	yes	0.489779	2.13991	0.0001	0.000748217	yes	FALSE
ENSG00000110435	0.297306	1.68921	0.00265	0.0129582	yes	0.45812	2.71507	5e-05	0.000394466	yes	TRUE
ENSG00000110492	-0.225715	-2.08442	0.0002	0.00139451	yes	-0.357924	-3.29109	5e-05	0.000394466	yes	FALSE
ENSG00000110619	-0.264283	-1.97381	0.0007	0.00417041	yes	-0.640653	-4.78051	5e-05	0.000394466	yes	TRUE
ENSG00000110931	-0.291836	-2.03332	0.00025	0.00169574	yes	-0.229781	-1.63348	0.0029	0.0139832	yes	TRUE
ENSG00000110944	0.550743	2.14204	0.0005	0.00312122	yes	0.87682	3.58193	5e-05	0.000394466	yes	TRUE
ENSG00000111181	1.59346	0.903809	0.0011	0.00616363	yes	1.71726	0.971674	0.00045	0.00285055	yes	FALSE
ENSG00000111196	-0.345486	-3.06125	5e-05	0.000394466	yes	-0.218164	-1.96449	0.0006	0.00365163	yes	FALSE
ENSG00000111229	0.442915	2.568	5e-05	0.000394466	yes	0.388078	2.15424	0.0002	0.00139451	yes	FALSE
ENSG00000111247	-0.719284	-5.25282	5e-05	0.000394466	yes	-0.313637	-2.17961	0.0002	0.00139451	yes	FALSE
ENSG00000111266	0.432682	2.17256	0.0001	0.000748217	yes	0.49669	2.5018	5e-05	0.000394466	yes	TRUE
ENSG00000111275	-0.275684	-1.59255	0.00595	0.0255172	yes	-0.541466	-3.07779	5e-05	0.000394466	yes	TRUE
ENSG00000111348	1.31522	1.92473	5e-05	0.000394466	yes	1.63321	2.40893	5e-05	0.000394466	yes	FALSE
ENSG00000111361	0.267612	1.57386	0.0064	0.0271381	yes	0.362841	2.1096	0.00015	0.00108114	yes	FALSE
ENSG00000111371	-0.294547	-1.7931	0.00015	0.00108114	yes	-0.435783	-2.71297	5e-05	0.000394466	yes	TRUE
ENSG00000111450	-0.741244	-4.65583	5e-05	0.000394466	yes	-0.715956	-4.61469	5e-05	0.000394466	yes	TRUE
ENSG00000111602	-0.366216	-2.77354	5e-05	0.000394466	yes	-0.239161	-1.84582	0.0011	0.00616363	yes	FALSE
ENSG00000111640	0.293084	2.38493	5e-05	0.000394466	yes	0.251592	2.05842	0.0004	0.00256373	yes	TRUE
ENSG00000111653	0.204669	1.73833	0.00205	0.010441	yes	-0.392502	-3.01737	5e-05	0.000394466	yes	FALSE
ENSG00000111665	-0.787982	-4.87547	5e-05	0.000394466	yes	-0.357629	-2.41707	5e-05	0.000394466	yes	FALSE
ENSG00000111684	0.734048	1.74255	0.00115	0.00640105	yes	0.704381	1.65171	0.00175	0.0091262	yes	FALSE
ENSG00000111716	-0.273544	-2.31974	5e-05	0.000394466	yes	0.271893	2.306	5e-05	0.000394466	yes	FALSE
ENSG00000111727	0.442998	3.45151	5e-05	0.000394466	yes	0.307373	2.39831	5e-05	0.000394466	yes	FALSE
ENSG00000111788	-0.801057	-4.77427	5e-05	0.000394466	yes	-0.489109	-2.94246	5e-05	0.000394466	yes	FALSE
ENSG00000111801	-0.420074	-2.23368	0.0001	0.000748217	yes	-0.558751	-2.54749	5e-05	0.000394466	yes	FALSE
ENSG00000111845	-0.247165	-2.0712	0.00055	0.00339017	yes	0.235359	1.83329	0.00145	0.00779664	yes	FALSE
ENSG00000111846	0.528501	2.98647	5e-05	0.000394466	yes	0.540223	2.82324	5e-05	0.000394466	yes	FALSE
ENSG00000111859	1.32024	5.21075	5e-05	0.000394466	yes	1.537	6.03163	5e-05	0.000394466	yes	FALSE
ENSG00000111885	-0.474502	-3.83012	5e-05	0.000394466	yes	1.00784	8.34247	5e-05	0.000394466	yes	FALSE
ENSG00000112029	-0.610531	-5.68474	5e-05	0.000394466	yes	-0.25428	-2.42174	5e-05	0.000394466	yes	FALSE
ENSG00000112033	0.303994	1.95381	0.00085	0.00494128	yes	0.522114	3.4126	5e-05	0.000394466	yes	TRUE
ENSG00000112079	0.359745	3.47981	5e-05	0.000394466	yes	0.313184	3.02249	5e-05	0.000394466	yes	TRUE
ENSG00000112130	-0.226773	-1.86592	0.0012	0.00663203	yes	0.45619	3.85681	5e-05	0.000394466	yes	TRUE
ENSG00000112167	0.17821	1.50223	0.0092	0.0365879	yes	-0.270679	-2.20333	0.00015	0.00108114	yes	FALSE
ENSG00000112183	-0.294341	-2.03044	0.00055	0.00339017	yes	0.323015	2.02279	0.0004	0.00256373	yes	FALSE
ENSG00000112234	-0.355875	-2.59909	5e-05	0.000394466	yes	-0.95264	-6.67559	5e-05	0.000394466	yes	TRUE
ENSG00000112237	0.244087	1.63814	0.00195	0.0100062	yes	0.695865	4.78409	5e-05	0.000394466	yes	TRUE
ENSG00000112242	-0.316653	-2.61421	5e-05	0.000394466	yes	0.195255	1.48005	0.0111	0.042697	yes	TRUE
ENSG00000112276	0.850949	3.56951	5e-05	0.000394466	yes	-1.14601	-3.56326	5e-05	0.000394466	yes	FALSE
ENSG00000112312	0.540888	4.14064	5e-05	0.000394466	yes	0.189411	1.44659	0.01315	0.0489374	yes	FALSE
ENSG00000112335	0.194932	1.52085	0.0075	0.0308919	yes	0.193526	1.52436	0.00785	0.0320641	yes	FALSE
ENSG00000112343	0.509715	4.28782	5e-05	0.000394466	yes	0.324624	2.70134	5e-05	0.000394466	yes	FALSE
ENSG00000112406	-0.237603	-2.12225	0.0002	0.00139451	yes	-0.275096	-2.46233	5e-05	0.000394466	yes	FALSE
ENSG00000112541	-0.221905	-1.9288	0.00125	0.0068727	yes	-0.571259	-4.70788	5e-05	0.000394466	yes	TRUE
ENSG00000112584	0.276906	2.37877	5e-05	0.000394466	yes	0.238863	2.12349	0.0002	0.00139451	yes	TRUE
ENSG00000112667	-0.230377	-2.20609	0.0002	0.00139451	yes	-0.717683	-6.6875	5e-05	0.000394466	yes	FALSE
ENSG00000112715	0.414057	2.21944	5e-05	0.000394466	yes	0.340588	1.83469	0.0014	0.00756525	yes	TRUE
ENSG00000112851	0.338183	1.77094	0.00025	0.00169574	yes	0.409206	2.00963	5e-05	0.000394466	yes	TRUE
ENSG00000112972	0.354278	2.29523	0.0001	0.000748217	yes	0.902554	6.11743	5e-05	0.000394466	yes	FALSE
ENSG00000112981	0.26529	1.76989	0.00205	0.010441	yes	0.491764	3.31823	5e-05	0.000394466	yes	FALSE
ENSG00000113070	0.426907	2.53515	5e-05	0.000394466	yes	0.65595	3.94785	5e-05	0.000394466	yes	FALSE
ENSG00000113141	0.371486	2.39049	5e-05	0.000394466	yes	0.318458	2.05863	0.00025	0.00169574	yes	FALSE
ENSG00000113194	0.267176	1.64422	0.0029	0.0139832	yes	0.359201	2.20697	5e-05	0.000394466	yes	TRUE
ENSG00000113209	-0.435304	-3.93793	5e-05	0.000394466	yes	-0.221553	-2.03531	0.00075	0.00442828	yes	FALSE
ENSG00000113356	-0.709184	-1.77972	0.00135	0.00733226	yes	0.625152	1.94263	0.00125	0.0068727	yes	FALSE
ENSG00000113369	0.329008	1.61815	0.00475	0.0211284	yes	0.884434	4.39421	5e-05	0.000394466	yes	TRUE
ENSG00000113494	2.35498	1.81511	5e-05	0.000394466	yes	1.72656	1.34065	5e-05	0.000394466	yes	FALSE
ENSG00000113532	-1.09967	-2.18416	0.0002	0.00139451	yes	-0.705161	-1.63767	0.0025	0.0123557	yes	FALSE
ENSG00000113552	-0.259657	-1.7148	0.0031	0.0147981	yes	-0.347513	-2.18388	0.00025	0.00169574	yes	FALSE
ENSG00000113583	0.320917	2.4839	5e-05	0.000394466	yes	0.211255	1.61597	0.0049	0.0216772	yes	TRUE
ENSG00000113648	0.214577	1.41484	0.0106	0.0410531	yes	0.491527	3.42831	5e-05	0.000394466	yes	TRUE
ENSG00000113732	0.707634	5.44549	5e-05	0.000394466	yes	0.413849	3.18	5e-05	0.000394466	yes	FALSE
ENSG00000113739	-0.946235	-4.07261	5e-05	0.000394466	yes	-1.14712	-4.52412	5e-05	0.000394466	yes	FALSE
ENSG00000113790	-0.629426	-1.32168	0.00685	0.028723	yes	-1.44099	-2.21757	5e-05	0.000394466	yes	FALSE
ENSG00000113812	0.297569	1.72226	0.0023	0.0115225	yes	0.258342	1.52714	0.0069	0.0288933	yes	FALSE
ENSG00000113889	0.795531	2.61905	5e-05	0.000394466	yes	-2.32954	-2.90318	5e-05	0.000394466	yes	FALSE
ENSG00000114120	-0.491023	-2.5798	5e-05	0.000394466	yes	-0.783685	-4.01169	5e-05	0.000394466	yes	TRUE
ENSG00000114125	0.270996	1.9478	0.001	0.00567333	yes	0.247322	1.78996	0.00225	0.0113068	yes	FALSE
ENSG00000114248	-0.321102	-1.52295	0.0083	0.0336268	yes	-1.29673	-5.18468	5e-05	0.000394466	yes	FALSE
ENSG00000114268	0.314928	2.03349	0.00015	0.00108114	yes	0.65558	4.33876	5e-05	0.000394466	yes	TRUE
ENSG00000114270	-0.55839	-2.17208	0.00015	0.00108114	yes	-1.00488	-3.49388	5e-05	0.000394466	yes	FALSE
ENSG00000114315	0.46917	4.3863	5e-05	0.000394466	yes	0.478672	4.49493	5e-05	0.000394466	yes	FALSE
ENSG00000114346	-0.509176	-3.28426	5e-05	0.000394466	yes	-0.23082	-1.51516	0.00705	0.0293726	yes	TRUE
ENSG00000114354	0.253108	2.04182	0.0005	0.00312122	yes	0.272963	2.20455	5e-05	0.000394466	yes	TRUE
ENSG00000114450	-0.275381	-2.06077	0.00065	0.00390953	yes	-1.36295	-8.70474	5e-05	0.000394466	yes	FALSE
ENSG00000114544	-0.262096	-1.84184	0.0017	0.00891245	yes	-0.615629	-4.25912	5e-05	0.000394466	yes	TRUE
ENSG00000114573	0.376713	2.4068	5e-05	0.000394466	yes	0.581818	3.72858	5e-05	0.000394466	yes	TRUE
ENSG00000114739	-0.481837	-3.41085	5e-05	0.000394466	yes	-0.545103	-3.54551	5e-05	0.000394466	yes	FALSE
ENSG00000114779	-0.489024	-1.5862	0.0049	0.0216772	yes	-0.655727	-2.1842	5e-05	0.000394466	yes	FALSE
ENSG00000114956	-0.250871	-2.24735	0.0001	0.000748217	yes	-0.227352	-2.01584	0.0004	0.00256373	yes	TRUE
ENSG00000115042	-0.278727	-1.81822	0.0017	0.00891245	yes	-0.288905	-1.81501	0.0015	0.00802265	yes	FALSE
ENSG00000115084	0.408329	2.12812	0.0002	0.00139451	yes	0.352909	1.84389	0.0015	0.00802265	yes	FALSE
ENSG00000115159	-0.990528	-5.29232	5e-05	0.000394466	yes	-0.433527	-2.31138	0.0001	0.000748217	yes	TRUE
ENSG00000115204	0.389704	3.39376	5e-05	0.000394466	yes	0.332036	2.99866	5e-05	0.000394466	yes	FALSE
ENSG00000115216	-0.733816	-5.94387	5e-05	0.000394466	yes	0.502033	3.85674	5e-05	0.000394466	yes	FALSE
ENSG00000115221	1.51714	0.666439	0.00495	0.0218443	yes	2.15912	0.998129	0.0001	0.000748217	yes	FALSE
ENSG00000115310	0.188831	1.46832	0.0098	0.0385095	yes	-0.273107	-2.03921	0.00015	0.00108114	yes	TRUE
ENSG00000115350	-0.421998	-3.23304	5e-05	0.000394466	yes	-0.361246	-2.84627	5e-05	0.000394466	yes	TRUE
ENSG00000115414	0.834275	4.92933	5e-05	0.000394466	yes	1.21336	7.06203	5e-05	0.000394466	yes	FALSE
ENSG00000115461	-1.13911	-4.71003	5e-05	0.000394466	yes	-1.70833	-4.67945	5e-05	0.000394466	yes	FALSE
ENSG00000115520	0.240845	1.90338	0.00105	0.00591759	yes	0.453408	3.55437	5e-05	0.000394466	yes	FALSE
ENSG00000115525	0.931656	3.47152	5e-05	0.000394466	yes	0.508903	1.80617	0.0013	0.00709758	yes	FALSE
ENSG00000115590	-0.606935	-2.26195	5e-05	0.000394466	yes	-0.676582	-2.08656	0.0004	0.00256373	yes	FALSE
ENSG00000115687	-0.664391	-2.90426	5e-05	0.000394466	yes	-0.396924	-1.78469	0.0016	0.00848051	yes	TRUE
ENSG00000115718	1.33675	1.21462	0.0038	0.0175716	yes	1.22614	1.12	0.00705	0.0293726	yes	FALSE
ENSG00000115738	2.28785	11.863	5e-05	0.000394466	yes	0.573221	3.17265	5e-05	0.000394466	yes	FALSE
ENSG00000115761	0.199667	1.43388	0.01135	0.0434594	yes	0.404526	2.9503	5e-05	0.000394466	yes	TRUE
ENSG00000115902	-0.941166	-4.65021	5e-05	0.000394466	yes	-1.91791	-7.69659	5e-05	0.000394466	yes	FALSE
ENSG00000115963	-0.605093	-3.29259	5e-05	0.000394466	yes	-1.27028	-6.70679	5e-05	0.000394466	yes	TRUE
ENSG00000116005	0.402364	2.79833	5e-05	0.000394466	yes	0.475953	3.29586	5e-05	0.000394466	yes	TRUE
ENSG00000116199	-0.236411	-1.84604	0.00195	0.0100062	yes	-0.288686	-2.26667	5e-05	0.000394466	yes	TRUE
ENSG00000116205	-0.362343	-1.79583	0.002	0.0102249	yes	-0.381701	-1.81956	0.0015	0.00802265	yes	FALSE
ENSG00000116285	0.269745	2.19455	0.00035	0.00228343	yes	0.515729	4.25504	5e-05	0.000394466	yes	TRUE
ENSG00000116353	-0.405113	-3.13952	5e-05	0.000394466	yes	-0.524605	-4.13246	5e-05	0.000394466	yes	TRUE
ENSG00000116455	0.656083	1.97489	0.001	0.00567333	yes	0.646799	1.94112	0.00115	0.00640105	yes	FALSE
ENSG00000116459	0.214333	1.56001	0.00635	0.0269509	yes	0.241126	1.72759	0.0025	0.0123557	yes	TRUE
ENSG00000116670	-0.207912	-2.02349	0.0002	0.00139451	yes	-0.209275	-2.03244	0.0003	0.00199267	yes	FALSE
ENSG00000116679	-0.831812	-5.34649	5e-05	0.000394466	yes	-0.445799	-2.91206	5e-05	0.000394466	yes	TRUE
ENSG00000116711	0.465279	2.12712	5e-05	0.000394466	yes	1.07656	5.39756	5e-05	0.000394466	yes	FALSE
ENSG00000116761	-0.445865	-3.97915	5e-05	0.000394466	yes	-1.0366	-8.61166	5e-05	0.000394466	yes	FALSE
ENSG00000116815	0.300346	2.05815	0.0003	0.00199267	yes	-0.381446	-2.50171	5e-05	0.000394466	yes	FALSE
ENSG00000116957	0.542175	4.39641	5e-05	0.000394466	yes	0.728036	5.88098	5e-05	0.000394466	yes	TRUE
ENSG00000116983	0.607313	4.31689	5e-05	0.000394466	yes	0.778468	5.63148	5e-05	0.000394466	yes	FALSE
ENSG00000116991	0.395819	2.25349	5e-05	0.000394466	yes	0.604255	3.44891	5e-05	0.000394466	yes	TRUE
ENSG00000117000	0.442161	3.69323	5e-05	0.000394466	yes	0.503172	4.20574	5e-05	0.000394466	yes	TRUE
ENSG00000117036	0.321084	2.04705	0.0005	0.00312122	yes	0.345519	2.28917	0.00015	0.00108114	yes	FALSE
ENSG00000117115	-0.33171	-1.48459	0.0087	0.0349407	yes	-0.417743	-1.76018	0.00135	0.00733226	yes	FALSE
ENSG00000117133	0.206253	1.69954	0.0028	0.0135814	yes	0.252207	2.07863	0.0001	0.000748217	yes	FALSE
ENSG00000117148	-1.87082	-3.00912	0.00025	0.00169574	yes	-3.03849	-3.07811	0.0009	0.00518136	yes	FALSE
ENSG00000117152	2.85649	3.32958	5e-05	0.000394466	yes	2.99646	3.53686	5e-05	0.000394466	yes	FALSE
ENSG00000117266	0.369301	1.87611	0.00065	0.00390953	yes	0.380343	1.86404	0.0005	0.00312122	yes	TRUE
ENSG00000117360	0.34268	2.38719	5e-05	0.000394466	yes	0.27012	1.92972	0.00105	0.00591759	yes	FALSE
ENSG00000117399	-0.599633	-4.6641	5e-05	0.000394466	yes	0.175658	1.42323	0.0118	0.0448507	yes	FALSE
ENSG00000117410	0.469778	3.82018	5e-05	0.000394466	yes	0.271197	2.20674	0.0001	0.000748217	yes	FALSE
ENSG00000117419	-0.325633	-2.43594	5e-05	0.000394466	yes	-0.640919	-4.7414	5e-05	0.000394466	yes	TRUE
ENSG00000117448	-0.304584	-2.23388	0.00015	0.00108114	yes	-0.318656	-2.36195	5e-05	0.000394466	yes	TRUE
ENSG00000117461	0.277373	1.62181	0.00475	0.0211284	yes	0.694146	4.09008	5e-05	0.000394466	yes	TRUE
ENSG00000117479	-0.218437	-1.83777	0.00125	0.0068727	yes	-0.535227	-4.47362	5e-05	0.000394466	yes	TRUE
ENSG00000117543	-0.554408	-3.95172	5e-05	0.000394466	yes	-0.244004	-1.74541	0.00255	0.0125635	yes	TRUE
ENSG00000117593	-0.263485	-1.78075	0.00065	0.00390953	yes	-0.308944	-2.02018	0.00015	0.00108114	yes	FALSE
ENSG00000117620	-0.402305	-2.40078	5e-05	0.000394466	yes	-0.785101	-5.04453	5e-05	0.000394466	yes	TRUE
ENSG00000117632	-0.428644	-3.4191	5e-05	0.000394466	yes	-0.482752	-3.82416	5e-05	0.000394466	yes	FALSE
ENSG00000117682	0.303867	1.83923	0.0009	0.00518136	yes	0.28404	1.66004	0.0025	0.0123557	yes	FALSE
ENSG00000117724	-0.795468	-5.23449	5e-05	0.000394466	yes	-0.691512	-4.74971	5e-05	0.000394466	yes	TRUE
ENSG00000117868	-0.500138	-3.94089	5e-05	0.000394466	yes	-0.764342	-5.66023	5e-05	0.000394466	yes	TRUE
ENSG00000118193	-0.721359	-6.46925	5e-05	0.000394466	yes	-0.174364	-1.42324	0.0134	0.0496941	yes	FALSE
ENSG00000118246	0.235129	1.73943	0.00325	0.0154039	yes	0.317672	2.38723	5e-05	0.000394466	yes	FALSE
ENSG00000118271	0.562418	2.95678	5e-05	0.000394466	yes	1.77492	10.0883	5e-05	0.000394466	yes	FALSE
ENSG00000118507	-0.523392	-2.80851	5e-05	0.000394466	yes	-1.01439	-4.59324	5e-05	0.000394466	yes	TRUE
ENSG00000118513	-1.28017	-3.25843	5e-05	0.000394466	yes	-1.13434	-3.33351	5e-05	0.000394466	yes	FALSE
ENSG00000118518	-0.307901	-2.36758	5e-05	0.000394466	yes	-0.78574	-5.55107	5e-05	0.000394466	yes	TRUE
ENSG00000118520	1.96994	4.49921	5e-05	0.000394466	yes	0.805512	1.66687	0.0046	0.0205619	yes	FALSE
ENSG00000118804	1.38993	5.38093	5e-05	0.000394466	yes	1.02554	3.9007	5e-05	0.000394466	yes	TRUE
ENSG00000118946	-2.45058	-6.7992	5e-05	0.000394466	yes	0.491557	2.85967	5e-05	0.000394466	yes	FALSE
ENSG00000118965	-0.688669	-4.53916	5e-05	0.000394466	yes	-0.370966	-2.38503	5e-05	0.000394466	yes	FALSE
ENSG00000118985	0.56853	1.83498	0.0007	0.00417041	yes	1.48502	5.28641	5e-05	0.000394466	yes	FALSE
ENSG00000119326	0.325505	2.41382	5e-05	0.000394466	yes	0.400296	2.96708	5e-05	0.000394466	yes	TRUE
ENSG00000119403	-0.452807	-2.55332	5e-05	0.000394466	yes	-0.560904	-3.16442	5e-05	0.000394466	yes	FALSE
ENSG00000119421	0.191569	1.58163	0.00585	0.0251702	yes	0.257928	2.13158	5e-05	0.000394466	yes	FALSE
ENSG00000119514	-0.479003	-2.24062	0.0002	0.00139451	yes	-1.28895	-4.65534	5e-05	0.000394466	yes	FALSE
ENSG00000119632	0.768716	3.90695	5e-05	0.000394466	yes	-0.429431	-1.76791	0.0019	0.00979865	yes	FALSE
ENSG00000119661	0.373959	1.55966	0.00715	0.0297132	yes	0.625977	2.62341	5e-05	0.000394466	yes	FALSE
ENSG00000119673	-0.22242	-1.75223	0.0028	0.0135814	yes	-0.476862	-3.83233	5e-05	0.000394466	yes	FALSE
ENSG00000119718	0.216611	1.85879	0.00145	0.00779664	yes	0.242002	2.08778	0.00065	0.00390953	yes	TRUE
ENSG00000119771	-0.321889	-2.3351	5e-05	0.000394466	yes	-0.432236	-3.07698	5e-05	0.000394466	yes	TRUE
ENSG00000119844	0.23242	1.8277	0.00135	0.00733226	yes	0.233233	1.79812	0.0012	0.00663203	yes	TRUE
ENSG00000119862	0.332722	1.6135	0.00525	0.0229379	yes	0.395355	1.90451	0.001	0.00567333	yes	FALSE
ENSG00000119900	-0.369999	-2.23759	0.00025	0.00169574	yes	-0.881367	-5.27438	5e-05	0.000394466	yes	FALSE
ENSG00000119969	-0.931563	-5.89784	5e-05	0.000394466	yes	-0.379772	-2.10754	0.0004	0.00256373	yes	FALSE
ENSG00000120254	-0.454702	-2.35884	5e-05	0.000394466	yes	-0.588605	-2.81619	5e-05	0.000394466	yes	TRUE
ENSG00000120256	-0.281769	-2.00031	0.00015	0.00108114	yes	-1.27906	-9.39551	5e-05	0.000394466	yes	FALSE
ENSG00000120322	-0.536984	-2.40957	5e-05	0.000394466	yes	-0.680583	-2.95274	5e-05	0.000394466	yes	FALSE
ENSG00000120594	-0.296093	-1.51133	0.00835	0.0337923	yes	-1.08446	-5.04949	5e-05	0.000394466	yes	FALSE
ENSG00000120658	0.574601	3.8829	5e-05	0.000394466	yes	0.449009	3.21199	5e-05	0.000394466	yes	TRUE
ENSG00000120693	-0.425562	-2.66107	0.0001	0.000748217	yes	-1.25965	-5.82632	5e-05	0.000394466	yes	TRUE
ENSG00000120699	-0.589862	-2.58938	5e-05	0.000394466	yes	-0.344561	-1.53659	0.0055	0.0238795	yes	FALSE
ENSG00000120705	0.267047	1.90325	0.00065	0.00390953	yes	0.514334	3.62632	5e-05	0.000394466	yes	TRUE
ENSG00000120738	1.17698	7.42798	5e-05	0.000394466	yes	-1.97265	-7.10167	5e-05	0.000394466	yes	FALSE
ENSG00000120756	0.791179	4.36365	5e-05	0.000394466	yes	0.281704	1.88459	0.00125	0.0068727	yes	FALSE
ENSG00000120802	-0.573431	-3.4648	5e-05	0.000394466	yes	-0.265043	-1.60048	0.00515	0.0225883	yes	TRUE
ENSG00000120833	-0.278262	-1.6795	0.00365	0.0170029	yes	-0.897372	-3.57013	5e-05	0.000394466	yes	FALSE
ENSG00000120860	0.303226	2.72464	5e-05	0.000394466	yes	-0.410185	-3.65318	5e-05	0.000394466	yes	TRUE
ENSG00000120875	-0.289518	-2.4046	5e-05	0.000394466	yes	0.514183	4.3064	5e-05	0.000394466	yes	TRUE
ENSG00000120899	0.499422	2.04127	0.00035	0.00228343	yes	0.343822	1.42724	0.0125	0.0469793	yes	TRUE
ENSG00000121064	0.447002	3.34685	5e-05	0.000394466	yes	0.361784	2.64912	5e-05	0.000394466	yes	FALSE
ENSG00000121068	1.50798	2.77355	5e-05	0.000394466	yes	0.883001	1.58317	0.0046	0.0205619	yes	FALSE
ENSG00000121211	-0.892153	-5.45235	5e-05	0.000394466	yes	-0.249806	-1.5238	0.00825	0.0334634	yes	FALSE
ENSG00000121289	-0.451038	-3.57282	5e-05	0.000394466	yes	-0.344813	-2.78721	5e-05	0.000394466	yes	FALSE
ENSG00000121413	-0.726029	-4.29432	5e-05	0.000394466	yes	-1.5239	-8.09707	5e-05	0.000394466	yes	TRUE
ENSG00000121552	-0.44789	-1.47443	0.0115	0.0439305	yes	-0.832576	-2.53963	0.0001	0.000748217	yes	FALSE
ENSG00000121644	-0.572493	-4.13398	5e-05	0.000394466	yes	-0.622202	-4.39484	5e-05	0.000394466	yes	TRUE
ENSG00000121671	0.263435	1.50114	0.0073	0.0302255	yes	0.416805	2.35513	5e-05	0.000394466	yes	FALSE
ENSG00000121749	0.243475	1.84821	0.0012	0.00663203	yes	0.303198	2.25866	0.00015	0.00108114	yes	TRUE
ENSG00000121858	1.15336	2.65164	5e-05	0.000394466	yes	1.25015	3.30257	5e-05	0.000394466	yes	FALSE
ENSG00000122008	0.407781	1.87525	0.0008	0.00468454	yes	0.466404	2.2003	5e-05	0.000394466	yes	TRUE
ENSG00000122035	0.725364	2.01841	0.0003	0.00199267	yes	1.08798	3.29216	5e-05	0.000394466	yes	FALSE
ENSG00000122218	0.364699	2.12264	0.0001	0.000748217	yes	0.267808	1.57601	0.0039	0.0179486	yes	FALSE
ENSG00000122359	0.329479	1.51637	0.00845	0.0341372	yes	0.366504	1.6485	0.0048	0.0213063	yes	TRUE
ENSG00000122378	-0.427457	-2.03816	0.0003	0.00199267	yes	-0.595444	-2.50747	5e-05	0.000394466	yes	FALSE
ENSG00000122477	1.43841	2.8955	5e-05	0.000394466	yes	1.72621	3.71702	5e-05	0.000394466	yes	TRUE
ENSG00000122497	-0.207842	-1.58955	0.00565	0.0244483	yes	-0.201132	-1.62513	0.0046	0.0205619	yes	FALSE
ENSG00000122507	-0.685464	-3.44114	5e-05	0.000394466	yes	-0.861638	-4.22148	5e-05	0.000394466	yes	TRUE
ENSG00000122515	-0.513067	-2.34453	5e-05	0.000394466	yes	-0.995133	-3.40815	5e-05	0.000394466	yes	TRUE
ENSG00000122547	0.397684	2.49872	5e-05	0.000394466	yes	0.766636	4.18631	5e-05	0.000394466	yes	TRUE
ENSG00000122694	-0.280097	-2.44924	5e-05	0.000394466	yes	-0.194646	-1.6432	0.00305	0.0145908	yes	FALSE
ENSG00000122707	-0.365897	-2.16324	0.0004	0.00256373	yes	-0.274385	-1.72653	0.0029	0.0139832	yes	FALSE
ENSG00000122783	0.601417	4.11617	5e-05	0.000394466	yes	0.260528	1.8049	0.0009	0.00518136	yes	TRUE
ENSG00000122862	0.471123	1.42637	0.012	0.0454611	yes	0.622293	1.90487	0.001	0.00567333	yes	FALSE
ENSG00000122971	0.443296	3.79141	5e-05	0.000394466	yes	0.314028	2.77085	5e-05	0.000394466	yes	FALSE
ENSG00000123080	-0.314116	-2.29543	0.00015	0.00108114	yes	-0.277049	-2.0063	0.0006	0.00365163	yes	FALSE
ENSG00000123091	0.342573	1.89945	0.0011	0.00616363	yes	0.456842	2.50308	5e-05	0.000394466	yes	TRUE
ENSG00000123136	-0.468256	-3.75039	5e-05	0.000394466	yes	0.218306	1.68518	0.00305	0.0145908	yes	TRUE
ENSG00000123219	-0.800652	-4.10258	5e-05	0.000394466	yes	-0.326776	-1.72933	0.00265	0.0129582	yes	TRUE
ENSG00000123364	0.630909	4.80153	5e-05	0.000394466	yes	0.316875	2.2811	5e-05	0.000394466	yes	FALSE
ENSG00000123505	0.443537	3.33502	5e-05	0.000394466	yes	0.740708	5.5473	5e-05	0.000394466	yes	TRUE
ENSG00000123595	0.353271	2.83704	5e-05	0.000394466	yes	0.389058	3.04727	5e-05	0.000394466	yes	TRUE
ENSG00000123600	0.687438	2.7854	5e-05	0.000394466	yes	1.00361	4.12268	5e-05	0.000394466	yes	TRUE
ENSG00000124097	-0.988691	-4.82822	5e-05	0.000394466	yes	-0.991162	-4.83623	5e-05	0.000394466	yes	FALSE
ENSG00000124098	-0.224242	-1.85803	0.00105	0.00591759	yes	-0.29771	-2.46095	5e-05	0.000394466	yes	TRUE
ENSG00000124107	0.646333	5.72351	5e-05	0.000394466	yes	1.46114	11.9967	5e-05	0.000394466	yes	FALSE
ENSG00000124145	0.619681	4.86901	5e-05	0.000394466	yes	0.606165	4.72417	5e-05	0.000394466	yes	FALSE
ENSG00000124164	0.458837	2.79217	5e-05	0.000394466	yes	0.514323	3.23202	5e-05	0.000394466	yes	TRUE
ENSG00000124171	0.334806	2.87881	5e-05	0.000394466	yes	0.458366	3.5089	5e-05	0.000394466	yes	FALSE
ENSG00000124201	0.641305	2.66255	5e-05	0.000394466	yes	0.975229	4.08513	5e-05	0.000394466	yes	FALSE
ENSG00000124207	-0.334847	-2.79122	5e-05	0.000394466	yes	0.314896	2.61295	5e-05	0.000394466	yes	TRUE
ENSG00000124215	-0.567554	-3.59071	5e-05	0.000394466	yes	-0.458518	-2.90547	5e-05	0.000394466	yes	TRUE
ENSG00000124233	2.8498	7.69337	5e-05	0.000394466	yes	3.81741	10.6512	5e-05	0.000394466	yes	FALSE
ENSG00000124243	0.314101	1.54109	0.00795	0.0324295	yes	0.455686	2.10534	0.0001	0.000748217	yes	FALSE
ENSG00000124313	0.322936	1.58423	0.00595	0.0255172	yes	-0.27107	-1.4896	0.01	0.039115	yes	FALSE
ENSG00000124333	0.202055	1.52948	0.0083	0.0336268	yes	-0.312512	-2.59793	5e-05	0.000394466	yes	FALSE
ENSG00000124356	0.271792	1.80943	0.00155	0.00824944	yes	0.280046	1.93633	0.0005	0.00312122	yes	TRUE
ENSG00000124374	-0.467301	-3.90352	5e-05	0.000394466	yes	-0.379079	-3.19413	5e-05	0.000394466	yes	FALSE
ENSG00000124380	0.373462	2.59069	5e-05	0.000394466	yes	0.322261	2.26894	5e-05	0.000394466	yes	FALSE
ENSG00000124406	-0.557243	-1.9558	0.00055	0.00339017	yes	-1.08456	-3.35736	5e-05	0.000394466	yes	TRUE
ENSG00000124523	-0.366522	-2.60519	5e-05	0.000394466	yes	-0.697531	-4.7992	5e-05	0.000394466	yes	TRUE
ENSG00000124529	-0.654317	-5.44669	5e-05	0.000394466	yes	-0.415765	-3.4721	5e-05	0.000394466	yes	FALSE
ENSG00000124570	-0.187092	-1.54986	0.00825	0.0334634	yes	-0.794023	-6.54481	5e-05	0.000394466	yes	TRUE
ENSG00000124615	0.23702	1.9452	0.00105	0.00591759	yes	0.197388	1.69072	0.00305	0.0145908	yes	TRUE
ENSG00000124635	-0.880134	-6.77578	5e-05	0.000394466	yes	-0.412042	-3.23603	5e-05	0.000394466	yes	FALSE
ENSG00000124693	-0.847019	-7.21289	5e-05	0.000394466	yes	-0.721471	-6.14833	5e-05	0.000394466	yes	FALSE
ENSG00000124762	0.411729	3.183	5e-05	0.000394466	yes	0.213241	1.65125	0.00445	0.0199963	yes	TRUE
ENSG00000124766	-0.436638	-3.69041	5e-05	0.000394466	yes	-0.462415	-3.90757	5e-05	0.000394466	yes	FALSE
ENSG00000124767	0.177331	1.51434	0.00775	0.0317375	yes	0.28447	2.43308	5e-05	0.000394466	yes	FALSE
ENSG00000124786	-0.422764	-2.67589	5e-05	0.000394466	yes	-0.378163	-2.60454	5e-05	0.000394466	yes	FALSE
ENSG00000124939	1.30813	3.24032	5e-05	0.000394466	yes	-1.1417	-1.77294	0.0047	0.0209396	yes	FALSE
ENSG00000125246	0.385215	2.56532	5e-05	0.000394466	yes	-0.314045	-1.96878	0.00085	0.00494128	yes	TRUE
ENSG00000125247	-0.64978	-3.66973	5e-05	0.000394466	yes	-0.819934	-4.63759	5e-05	0.000394466	yes	TRUE
ENSG00000125266	-0.260322	-2.18396	0.0001	0.000748217	yes	0.272571	2.2976	0.00015	0.00108114	yes	TRUE
ENSG00000125347	0.321544	1.53923	0.00415	0.0188795	yes	0.476958	2.05977	0.0002	0.00139451	yes	TRUE
ENSG00000125454	-0.607148	-4.08406	5e-05	0.000394466	yes	0.243852	1.63315	0.00425	0.0192412	yes	FALSE
ENSG00000125458	-0.215344	-1.62953	0.00425	0.0192412	yes	-0.364431	-2.77577	5e-05	0.000394466	yes	FALSE
ENSG00000125534	-0.349291	-2.96883	5e-05	0.000394466	yes	-0.670838	-5.48641	5e-05	0.000394466	yes	FALSE
ENSG00000125637	-0.448872	-2.14782	0.0001	0.000748217	yes	-1.85112	-8.7478	5e-05	0.000394466	yes	TRUE
ENSG00000125775	1.74766	2.78458	5e-05	0.000394466	yes	2.16605	3.56064	5e-05	0.000394466	yes	TRUE
ENSG00000125780	1.09289	8.58479	5e-05	0.000394466	yes	0.502927	3.79016	5e-05	0.000394466	yes	FALSE
ENSG00000125812	0.469851	2.5314	5e-05	0.000394466	yes	0.477303	2.44887	5e-05	0.000394466	yes	TRUE
ENSG00000125821	-0.260883	-2.11641	0.00025	0.00169574	yes	-0.451864	-3.65658	5e-05	0.000394466	yes	TRUE
ENSG00000125827	-0.652285	-4.72323	5e-05	0.000394466	yes	-0.87593	-5.09385	5e-05	0.000394466	yes	FALSE
ENSG00000125877	-0.232747	-1.98794	0.0005	0.00312122	yes	-0.433191	-3.63795	5e-05	0.000394466	yes	FALSE
ENSG00000125895	0.535011	1.45037	0.012	0.0454611	yes	0.904636	2.65289	5e-05	0.000394466	yes	FALSE
ENSG00000126067	0.169314	1.41686	0.0128	0.0479053	yes	0.170705	1.42862	0.01285	0.0480534	yes	TRUE
ENSG00000126070	0.578158	2.30082	5e-05	0.000394466	yes	0.523114	2.03221	0.0003	0.00199267	yes	TRUE
ENSG00000126262	0.811501	2.44869	5e-05	0.000394466	yes	0.678121	1.77277	0.00165	0.00869476	yes	FALSE
ENSG00000126453	-0.689075	-2.60282	5e-05	0.000394466	yes	0.415449	1.80765	0.0027	0.0131678	yes	FALSE
ENSG00000126458	0.618227	4.29187	5e-05	0.000394466	yes	-0.349437	-2.22401	0.00015	0.00108114	yes	FALSE
ENSG00000126524	0.555869	3.64314	5e-05	0.000394466	yes	0.265	1.68966	0.00355	0.0166083	yes	FALSE
ENSG00000126756	-0.172069	-1.67858	0.003	0.0143914	yes	-0.371152	-3.54928	5e-05	0.000394466	yes	FALSE
ENSG00000126790	-0.780056	-2.16281	0.00045	0.00285055	yes	-0.527717	-1.54824	0.00825	0.0334634	yes	FALSE
ENSG00000126878	-0.225924	-1.84837	0.00105	0.00591759	yes	-0.234394	-1.91491	0.0006	0.00365163	yes	FALSE
ENSG00000127152	-0.947865	-3.43208	5e-05	0.000394466	yes	-1.4991	-4.66092	5e-05	0.000394466	yes	FALSE
ENSG00000127184	0.339978	2.6363	5e-05	0.000394466	yes	0.294241	2.26914	0.0004	0.00256373	yes	FALSE
ENSG00000127337	-0.624316	-5.00303	5e-05	0.000394466	yes	-0.301257	-2.41299	0.00015	0.00108114	yes	TRUE
ENSG00000127399	-0.374459	-1.64503	0.004	0.0183221	yes	-0.475216	-2.16261	0.0002	0.00139451	yes	FALSE
ENSG00000127418	0.467654	2.9591	5e-05	0.000394466	yes	0.315606	2.00181	0.0011	0.00616363	yes	TRUE
ENSG00000127419	0.446422	1.58869	0.00365	0.0170029	yes	-0.468877	-1.9529	0.0011	0.00616363	yes	FALSE
ENSG00000127561	0.523202	1.67153	0.0026	0.0127622	yes	0.477041	1.61799	0.00395	0.018135	yes	FALSE
ENSG00000127564	-1.09951	-4.58434	5e-05	0.000394466	yes	-0.666696	-2.98825	5e-05	0.000394466	yes	TRUE
ENSG00000127863	-0.984648	-7.35937	5e-05	0.000394466	yes	-0.203527	-1.5444	0.0081	0.0329491	yes	TRUE
ENSG00000127870	0.675766	3.3262	5e-05	0.000394466	yes	0.402805	1.99168	0.00055	0.00339017	yes	FALSE
ENSG00000127914	0.727326	2.93158	5e-05	0.000394466	yes	1.0944	4.58341	5e-05	0.000394466	yes	TRUE
ENSG00000127952	-0.33656	-2.76488	5e-05	0.000394466	yes	-0.964881	-7.62003	5e-05	0.000394466	yes	FALSE
ENSG00000128165	-0.588686	-4.46944	5e-05	0.000394466	yes	-1.12867	-7.53573	5e-05	0.000394466	yes	FALSE
ENSG00000128245	-0.575983	-4.7623	5e-05	0.000394466	yes	-1.60523	-12.8282	5e-05	0.000394466	yes	FALSE
ENSG00000128272	-0.545251	-4.63558	5e-05	0.000394466	yes	-0.627102	-5.32181	5e-05	0.000394466	yes	TRUE
ENSG00000128284	1.13993	3.03312	5e-05	0.000394466	yes	0.786921	1.74112	0.0002	0.00139451	yes	FALSE
ENSG00000128524	0.327216	2.62895	5e-05	0.000394466	yes	0.257957	2.06815	0.00015	0.00108114	yes	FALSE
ENSG00000128564	-0.664713	-1.97414	0.00085	0.00494128	yes	-0.519945	-1.59404	0.0073	0.0302255	yes	FALSE
ENSG00000128585	0.437268	2.15644	0.0003	0.00199267	yes	0.544767	2.64503	5e-05	0.000394466	yes	TRUE
ENSG00000128654	-0.55817	-4.20545	5e-05	0.000394466	yes	-1.00016	-7.182	5e-05	0.000394466	yes	TRUE
ENSG00000128829	-0.568034	-4.23578	5e-05	0.000394466	yes	-0.447775	-3.29135	5e-05	0.000394466	yes	TRUE
ENSG00000128849	0.247605	1.73592	0.0022	0.0110897	yes	-0.278225	-1.70541	0.0039	0.0179486	yes	TRUE
ENSG00000128918	1.08587	1.36401	0.00165	0.00869476	yes	0.989933	1.19326	0.0038	0.0175716	yes	FALSE
ENSG00000128951	-0.359137	-2.52772	5e-05	0.000394466	yes	-0.442531	-3.14905	5e-05	0.000394466	yes	FALSE
ENSG00000128965	-1.02185	-5.48402	5e-05	0.000394466	yes	-1.76984	-8.64285	5e-05	0.000394466	yes	TRUE
ENSG00000129116	0.655212	2.44709	5e-05	0.000394466	yes	0.966941	3.72718	5e-05	0.000394466	yes	TRUE
ENSG00000129158	-0.412106	-2.67521	5e-05	0.000394466	yes	-0.879905	-6.13195	5e-05	0.000394466	yes	TRUE
ENSG00000129173	-0.853901	-4.90949	5e-05	0.000394466	yes	-0.607657	-3.59735	5e-05	0.000394466	yes	FALSE
ENSG00000129474	-0.833136	-3.49478	5e-05	0.000394466	yes	-1.65131	-5.88655	5e-05	0.000394466	yes	FALSE
ENSG00000129625	0.495826	2.37192	5e-05	0.000394466	yes	0.314314	1.49646	0.007	0.029217	yes	FALSE
ENSG00000129646	-0.416412	-2.01086	0.0011	0.00616363	yes	-0.639728	-2.39257	0.0003	0.00199267	yes	TRUE
ENSG00000129824	-0.171934	-1.41809	0.0133	0.0493927	yes	-0.233902	-1.91798	0.00135	0.00733226	yes	TRUE
ENSG00000129910	0.850189	2.58882	5e-05	0.000394466	yes	0.532582	1.61429	0.00655	0.0276809	yes	FALSE
ENSG00000130054	-0.267718	-2.35257	0.0001	0.000748217	yes	-0.196999	-1.74152	0.0022	0.0110897	yes	FALSE
ENSG00000130066	0.649259	5.37858	5e-05	0.000394466	yes	-0.21232	-1.73886	0.00265	0.0129582	yes	FALSE
ENSG00000130193	-0.421722	-2.9573	5e-05	0.000394466	yes	-0.615976	-4.51594	5e-05	0.000394466	yes	TRUE
ENSG00000130204	-0.437415	-2.81635	5e-05	0.000394466	yes	0.380961	2.58223	5e-05	0.000394466	yes	TRUE
ENSG00000130222	0.422662	3.68366	5e-05	0.000394466	yes	0.278456	2.40256	5e-05	0.000394466	yes	FALSE
ENSG00000130234	0.914625	1.20284	0.0059	0.0253499	yes	2.13798	3.05323	5e-05	0.000394466	yes	FALSE
ENSG00000130303	1.09926	4.17236	5e-05	0.000394466	yes	0.712878	2.5749	5e-05	0.000394466	yes	FALSE
ENSG00000130309	-0.19997	-1.41492	0.01255	0.0471385	yes	0.324156	2.50147	5e-05	0.000394466	yes	FALSE
ENSG00000130338	0.19631	1.46957	0.01045	0.0405686	yes	0.367735	2.78554	5e-05	0.000394466	yes	TRUE
ENSG00000130340	0.380981	3.45056	5e-05	0.000394466	yes	0.315038	2.84262	5e-05	0.000394466	yes	TRUE
ENSG00000130347	-0.196914	-1.43022	0.01055	0.0408995	yes	0.182413	1.40001	0.0125	0.0469793	yes	TRUE
ENSG00000130413	-0.89512	-5.52087	5e-05	0.000394466	yes	-1.12449	-7.0692	5e-05	0.000394466	yes	TRUE
ENSG00000130511	-0.301603	-1.52308	0.007	0.029217	yes	-0.30131	-1.59296	0.00525	0.0229379	yes	TRUE
ENSG00000130513	0.650177	5.5132	5e-05	0.000394466	yes	0.424653	3.59233	5e-05	0.000394466	yes	FALSE
ENSG00000130520	-0.225946	-1.84454	0.00145	0.00779664	yes	-0.271324	-2.21678	5e-05	0.000394466	yes	TRUE
ENSG00000130584	0.558805	2.3448	0.00045	0.00285055	yes	1.23487	5.23737	5e-05	0.000394466	yes	TRUE
ENSG00000130699	0.5529	1.53823	0.00635	0.0269509	yes	1.23919	3.83642	5e-05	0.000394466	yes	TRUE
ENSG00000130703	0.36141	2.68945	5e-05	0.000394466	yes	0.350306	2.57705	5e-05	0.000394466	yes	TRUE
ENSG00000130707	0.475409	3.77525	5e-05	0.000394466	yes	0.686976	5.47022	5e-05	0.000394466	yes	TRUE
ENSG00000130748	-0.297276	-2.12054	0.00025	0.00169574	yes	-0.334967	-2.37698	5e-05	0.000394466	yes	TRUE
ENSG00000130766	-0.223044	-2.20818	0.0002	0.00139451	yes	-0.257992	-2.54973	5e-05	0.000394466	yes	TRUE
ENSG00000130779	0.412996	2.46181	5e-05	0.000394466	yes	0.303276	1.81897	0.0018	0.00935173	yes	TRUE
ENSG00000131002	-0.54279	-3.07242	5e-05	0.000394466	yes	-0.326705	-1.8129	0.0013	0.00709758	yes	TRUE
ENSG00000131069	0.404669	2.14451	0.0002	0.00139451	yes	0.411992	2.21439	5e-05	0.000394466	yes	TRUE
ENSG00000131089	-0.945755	-5.50705	5e-05	0.000394466	yes	-2.31078	-11.544	5e-05	0.000394466	yes	TRUE
ENSG00000131100	0.478276	3.99407	5e-05	0.000394466	yes	0.226799	1.89007	0.00095	0.00542971	yes	FALSE
ENSG00000131171	-0.201115	-1.75786	0.00195	0.0100062	yes	-0.383779	-3.26938	5e-05	0.000394466	yes	FALSE
ENSG00000131236	0.27365	2.02094	0.00055	0.00339017	yes	0.37149	2.66784	5e-05	0.000394466	yes	FALSE
ENSG00000131370	0.207349	1.43199	0.01105	0.0425401	yes	0.428976	2.95158	5e-05	0.000394466	yes	FALSE
ENSG00000131374	-0.703316	-2.90856	5e-05	0.000394466	yes	-2.1763	-9.19197	5e-05	0.000394466	yes	TRUE
ENSG00000131473	0.220933	1.76737	0.0012	0.00663203	yes	0.517388	4.14287	5e-05	0.000394466	yes	TRUE
ENSG00000131475	0.365644	3.03814	5e-05	0.000394466	yes	0.213306	1.76757	0.00145	0.00779664	yes	FALSE
ENSG00000131480	-1.13369	-4.34463	5e-05	0.000394466	yes	-0.983721	-3.79055	5e-05	0.000394466	yes	TRUE
ENSG00000131558	-0.482949	-2.35508	5e-05	0.000394466	yes	-0.535207	-2.58183	5e-05	0.000394466	yes	TRUE
ENSG00000131591	-0.504441	-2.4771	5e-05	0.000394466	yes	-0.371577	-1.81716	0.00135	0.00733226	yes	TRUE
ENSG00000131652	-0.551662	-2.59198	5e-05	0.000394466	yes	-0.30669	-1.51631	0.0066	0.0278561	yes	FALSE
ENSG00000131732	0.182204	1.54888	0.0062	0.0263992	yes	0.445144	3.49957	5e-05	0.000394466	yes	FALSE
ENSG00000131747	-0.770514	-5.50364	5e-05	0.000394466	yes	-0.544575	-3.89574	5e-05	0.000394466	yes	FALSE
ENSG00000131759	0.404902	1.78842	0.00165	0.00869476	yes	0.586083	2.70104	5e-05	0.000394466	yes	TRUE
ENSG00000131771	1.4456	9.72653	5e-05	0.000394466	yes	1.36527	9.17503	5e-05	0.000394466	yes	FALSE
ENSG00000131779	0.59739	4.91478	5e-05	0.000394466	yes	0.466052	3.31966	5e-05	0.000394466	yes	FALSE
ENSG00000131791	0.626547	2.87826	5e-05	0.000394466	yes	0.530423	2.62368	5e-05	0.000394466	yes	TRUE
ENSG00000131831	0.753128	1.96379	0.00195	0.0100062	yes	-1.0143	-1.85833	5e-05	0.000394466	yes	FALSE
ENSG00000131844	-0.286678	-2.18235	0.0003	0.00199267	yes	-0.245805	-1.85581	0.00155	0.00824944	yes	TRUE
ENSG00000131845	0.249322	2.38703	5e-05	0.000394466	yes	0.792993	6.8288	5e-05	0.000394466	yes	FALSE
ENSG00000131931	0.361188	2.67781	5e-05	0.000394466	yes	0.218414	1.4793	0.0102	0.0397458	yes	FALSE
ENSG00000132122	-0.651367	-2.24283	5e-05	0.000394466	yes	-1.04361	-2.39797	0.0001	0.000748217	yes	TRUE
ENSG00000132141	-0.972155	-1.51923	0.01265	0.0474465	yes	-1.84487	-2.52457	0.00045	0.00285055	yes	FALSE
ENSG00000132170	0.769913	3.86934	5e-05	0.000394466	yes	0.683542	3.52594	5e-05	0.000394466	yes	FALSE
ENSG00000132182	-0.769887	-5.747	5e-05	0.000394466	yes	-0.522971	-3.89713	5e-05	0.000394466	yes	TRUE
ENSG00000132275	0.257839	1.8266	0.00095	0.00542971	yes	0.463019	3.07322	5e-05	0.000394466	yes	TRUE
ENSG00000132329	0.417507	3.46082	5e-05	0.000394466	yes	-0.598245	-4.88055	5e-05	0.000394466	yes	TRUE
ENSG00000132330	-0.678579	-2.30693	0.0001	0.000748217	yes	-0.683813	-2.47933	5e-05	0.000394466	yes	TRUE
ENSG00000132361	-0.381046	-1.5662	0.0043	0.0194374	yes	0.407045	1.68911	0.00185	0.00957288	yes	TRUE
ENSG00000132405	0.274364	1.69911	0.00325	0.0154039	yes	0.435229	2.65586	5e-05	0.000394466	yes	TRUE
ENSG00000132437	1.01061	6.73705	5e-05	0.000394466	yes	0.223354	1.4603	0.01115	0.0428447	yes	TRUE
ENSG00000132471	0.575577	4.04415	5e-05	0.000394466	yes	0.247054	1.80392	0.00115	0.00640105	yes	FALSE
ENSG00000132589	0.23421	1.68673	0.00235	0.0117337	yes	-0.287145	-2.12248	0.00025	0.00169574	yes	FALSE
ENSG00000132746	-0.43395	-2.17089	0.00055	0.00339017	yes	-0.891292	-4.11211	5e-05	0.000394466	yes	TRUE
ENSG00000132842	-0.600876	-3.46138	5e-05	0.000394466	yes	-0.84938	-4.90479	5e-05	0.000394466	yes	TRUE
ENSG00000132912	-0.257479	-1.60777	0.003	0.0143914	yes	-0.456386	-2.76382	5e-05	0.000394466	yes	TRUE
ENSG00000132952	0.366598	2.59088	5e-05	0.000394466	yes	0.210242	1.45137	0.01115	0.0428447	yes	TRUE
ENSG00000132963	0.194129	1.62069	0.00445	0.0199963	yes	0.326385	2.72818	5e-05	0.000394466	yes	FALSE
ENSG00000132964	0.704272	4.31079	5e-05	0.000394466	yes	0.786284	5.4645	5e-05	0.000394466	yes	TRUE
ENSG00000132967	-0.425023	-3.40547	5e-05	0.000394466	yes	-0.220245	-1.8086	0.0019	0.00979865	yes	FALSE
ENSG00000133019	1.06368	4.19065	5e-05	0.000394466	yes	-0.565395	-1.88988	0.00185	0.00957288	yes	TRUE
ENSG00000133101	0.94478	1.93723	0.0002	0.00139451	yes	-1.31232	-1.50162	0.00195	0.0100062	yes	FALSE
ENSG00000133104	-0.69843	-3.79428	5e-05	0.000394466	yes	-1.31092	-6.50465	5e-05	0.000394466	yes	FALSE
ENSG00000133119	-0.713055	-5.75501	5e-05	0.000394466	yes	-0.396998	-3.19304	5e-05	0.000394466	yes	TRUE
ENSG00000133131	-0.344454	-2.31211	0.0001	0.000748217	yes	-0.430518	-2.83543	5e-05	0.000394466	yes	TRUE
ENSG00000133135	0.488041	3.81846	5e-05	0.000394466	yes	-0.299401	-2.04966	0.0004	0.00256373	yes	FALSE
ENSG00000133195	0.28805	1.64288	0.00495	0.0218443	yes	-0.390399	-2.12068	0.00025	0.00169574	yes	TRUE
ENSG00000133321	1.67335	5.67264	5e-05	0.000394466	yes	0.567012	1.70949	0.0023	0.0115225	yes	FALSE
ENSG00000133687	1.33069	4.66811	5e-05	0.000394466	yes	0.439248	1.42141	0.0057	0.0246243	yes	FALSE
ENSG00000133739	-0.389902	-3.33623	5e-05	0.000394466	yes	-0.619411	-5.11657	5e-05	0.000394466	yes	TRUE
ENSG00000133895	-0.2502	-1.50573	0.01005	0.0392746	yes	0.239445	1.73787	0.0028	0.0135814	yes	FALSE
ENSG00000133962	2.1015	0.956906	0.00905	0.0360925	yes	2.54068	1.19322	0.0021	0.0106535	yes	FALSE
ENSG00000134057	-0.486421	-3.43341	5e-05	0.000394466	yes	0.327984	2.32984	5e-05	0.000394466	yes	FALSE
ENSG00000134109	-0.416622	-1.95122	0.0012	0.00663203	yes	-0.424211	-1.99762	0.00155	0.00824944	yes	TRUE
ENSG00000134152	-0.291405	-1.96613	0.00055	0.00339017	yes	-0.433185	-2.50385	5e-05	0.000394466	yes	TRUE
ENSG00000134240	1.46957	11.6622	5e-05	0.000394466	yes	-0.872822	-6.36881	5e-05	0.000394466	yes	TRUE
ENSG00000134243	0.450138	2.80176	5e-05	0.000394466	yes	0.303105	1.88938	0.00015	0.00108114	yes	TRUE
ENSG00000134255	0.30472	1.48782	0.0092	0.0365879	yes	0.326071	1.66225	0.00335	0.0158116	yes	FALSE
ENSG00000134326	-0.563925	-2.50696	5e-05	0.000394466	yes	-1.01398	-3.64772	5e-05	0.000394466	yes	FALSE
ENSG00000134333	0.591169	4.60386	5e-05	0.000394466	yes	0.311438	2.44323	5e-05	0.000394466	yes	TRUE
ENSG00000134444	0.375729	1.91939	0.0005	0.00312122	yes	0.30946	1.55583	0.0055	0.0238795	yes	TRUE
ENSG00000134574	-0.607945	-5.84328	5e-05	0.000394466	yes	-0.303026	-2.94798	5e-05	0.000394466	yes	TRUE
ENSG00000134684	-0.340941	-2.14327	0.0003	0.00199267	yes	-0.641457	-3.92816	5e-05	0.000394466	yes	TRUE
ENSG00000134690	-0.522099	-4.8871	5e-05	0.000394466	yes	0.315035	3.09498	5e-05	0.000394466	yes	FALSE
ENSG00000134809	-0.418716	-3.86497	5e-05	0.000394466	yes	-0.283702	-2.61237	5e-05	0.000394466	yes	TRUE
ENSG00000134824	0.385225	1.82118	0.0013	0.00709758	yes	0.302753	1.40292	0.0129	0.0482046	yes	TRUE
ENSG00000134954	-0.364055	-1.34056	0.0097	0.0381979	yes	-1.2131	-3.31455	5e-05	0.000394466	yes	FALSE
ENSG00000134986	-0.593057	-2.20093	0.0004	0.00256373	yes	-0.643009	-2.48514	0.0001	0.000748217	yes	TRUE
ENSG00000135018	0.325727	2.18667	0.00025	0.00169574	yes	0.265369	1.74479	0.0024	0.0119296	yes	TRUE
ENSG00000135040	0.358452	2.72933	5e-05	0.000394466	yes	0.426053	3.28093	5e-05	0.000394466	yes	TRUE
ENSG00000135045	-0.478169	-3.97633	5e-05	0.000394466	yes	-0.396895	-3.32708	5e-05	0.000394466	yes	TRUE
ENSG00000135069	-0.444583	-3.77891	5e-05	0.000394466	yes	-1.22309	-10.3805	5e-05	0.000394466	yes	TRUE
ENSG00000135070	-0.438715	-3.47633	5e-05	0.000394466	yes	-0.232558	-1.85471	0.0012	0.00663203	yes	FALSE
ENSG00000135090	0.348838	1.67018	0.0027	0.0131678	yes	0.44832	2.10946	0.0001	0.000748217	yes	TRUE
ENSG00000135205	2.30268	3.01041	5e-05	0.000394466	yes	2.13807	2.80002	5e-05	0.000394466	yes	FALSE
ENSG00000135241	0.436012	1.84344	0.0011	0.00616363	yes	0.358051	1.5096	0.00845	0.0341372	yes	FALSE
ENSG00000135269	-0.280926	-1.91923	0.00075	0.00442828	yes	-0.402146	-2.76104	5e-05	0.000394466	yes	TRUE
ENSG00000135363	-0.540028	-2.07175	0.00015	0.00108114	yes	-0.430874	-1.69331	0.0013	0.00709758	yes	FALSE
ENSG00000135372	-0.280546	-1.56234	0.0079	0.0322493	yes	-0.293846	-1.54083	0.0121	0.0457679	yes	TRUE
ENSG00000135451	-0.60201	-3.58398	5e-05	0.000394466	yes	-0.413558	-2.62455	5e-05	0.000394466	yes	FALSE
ENSG00000135525	0.369534	2.62743	5e-05	0.000394466	yes	0.759135	5.55927	5e-05	0.000394466	yes	TRUE
ENSG00000135547	-0.885937	-2.11111	0.00025	0.00169574	yes	-0.941512	-2.20187	0.00015	0.00108114	yes	FALSE
ENSG00000135828	0.329333	2.63092	5e-05	0.000394466	yes	-0.303509	-2.2793	5e-05	0.000394466	yes	FALSE
ENSG00000135919	-0.368024	-1.34331	0.0118	0.0448507	yes	-0.720843	-3.24842	5e-05	0.000394466	yes	FALSE
ENSG00000135925	-0.457841	-2.09216	5e-05	0.000394466	yes	-1.04718	-4.1089	5e-05	0.000394466	yes	FALSE
ENSG00000135930	0.391845	1.96587	0.00065	0.00390953	yes	0.44004	2.25808	0.00015	0.00108114	yes	FALSE
ENSG00000135956	0.193458	1.69798	0.0031	0.0147981	yes	0.319612	2.64681	5e-05	0.000394466	yes	FALSE
ENSG00000136068	0.456708	2.60263	5e-05	0.000394466	yes	0.214323	1.18548	0.00625	0.0265855	yes	TRUE
ENSG00000136104	-0.344679	-2.63584	5e-05	0.000394466	yes	-0.62278	-4.726	5e-05	0.000394466	yes	FALSE
ENSG00000136143	-0.35862	-2.08745	0.0003	0.00199267	yes	-0.860801	-4.53782	5e-05	0.000394466	yes	TRUE
ENSG00000136205	-0.524839	-1.87987	5e-05	0.000394466	yes	-0.360138	-1.3698	0.0041	0.0186935	yes	FALSE
ENSG00000136213	-0.490185	-3.66724	5e-05	0.000394466	yes	-0.704842	-5.09545	5e-05	0.000394466	yes	TRUE
ENSG00000136235	0.332003	1.50465	0.00525	0.0229379	yes	0.381264	1.79282	0.0009	0.00518136	yes	FALSE
ENSG00000136279	0.325198	2.17999	5e-05	0.000394466	yes	0.43156	2.81741	5e-05	0.000394466	yes	TRUE
ENSG00000136280	-1.07731	-8.25307	5e-05	0.000394466	yes	-1.06246	-7.84406	5e-05	0.000394466	yes	TRUE
ENSG00000136295	-0.341225	-2.0118	0.00055	0.00339017	yes	-0.270227	-1.53752	0.007	0.029217	yes	TRUE
ENSG00000136379	-0.418975	-2.44811	5e-05	0.000394466	yes	-0.292722	-1.63301	0.00505	0.0222042	yes	TRUE
ENSG00000136492	-0.879484	-5.09509	5e-05	0.000394466	yes	-0.583687	-3.53263	5e-05	0.000394466	yes	TRUE
ENSG00000136682	0.259514	2.14771	0.0001	0.000748217	yes	0.332716	2.79236	5e-05	0.000394466	yes	FALSE
ENSG00000136717	0.356102	2.78634	5e-05	0.000394466	yes	0.55449	4.35427	5e-05	0.000394466	yes	TRUE
ENSG00000136720	-0.276772	-2.36189	0.0001	0.000748217	yes	0.281855	2.17613	0.00015	0.00108114	yes	TRUE
ENSG00000136770	-0.381275	-3.29099	5e-05	0.000394466	yes	-0.283478	-2.20991	5e-05	0.000394466	yes	TRUE
ENSG00000136824	-0.591879	-4.45398	5e-05	0.000394466	yes	-0.31704	-2.5097	5e-05	0.000394466	yes	FALSE
ENSG00000136826	-0.433588	-2.92343	5e-05	0.000394466	yes	-0.263229	-1.77343	0.00115	0.00640105	yes	FALSE
ENSG00000136856	0.249944	1.78871	0.0015	0.00802265	yes	0.29802	2.1426	5e-05	0.000394466	yes	FALSE
ENSG00000136861	-0.700036	-3.63171	5e-05	0.000394466	yes	-0.5305	-2.97061	5e-05	0.000394466	yes	TRUE
ENSG00000136888	0.537671	4.50733	5e-05	0.000394466	yes	0.19393	1.61743	0.0051	0.0223992	yes	TRUE
ENSG00000136938	-0.361362	-2.87763	5e-05	0.000394466	yes	-0.202701	-1.60084	0.006	0.0256898	yes	TRUE
ENSG00000137094	0.286519	1.83001	0.00065	0.00390953	yes	0.449006	3.0031	5e-05	0.000394466	yes	FALSE
ENSG00000137133	-0.289425	-2.18613	0.00035	0.00228343	yes	-0.909013	-6.69574	5e-05	0.000394466	yes	FALSE
ENSG00000137135	-0.741312	-3.67669	5e-05	0.000394466	yes	-0.455451	-2.14283	0.0002	0.00139451	yes	FALSE
ENSG00000137210	0.804138	6.37902	5e-05	0.000394466	yes	0.82012	6.47992	5e-05	0.000394466	yes	TRUE
ENSG00000137216	0.480237	1.85224	0.00125	0.0068727	yes	0.453279	1.75925	0.00195	0.0100062	yes	FALSE
ENSG00000137259	-0.758405	-6.53228	5e-05	0.000394466	yes	-0.469487	-4.09842	5e-05	0.000394466	yes	FALSE
ENSG00000137266	0.464898	2.18635	0.00015	0.00108114	yes	0.341429	1.62979	0.00405	0.0185143	yes	TRUE
ENSG00000137310	-1.01262	-1.809	0.01195	0.045312	yes	-0.631354	-1.97855	0.0006	0.00365163	yes	FALSE
ENSG00000137364	0.476428	4.1898	5e-05	0.000394466	yes	0.357379	3.24107	5e-05	0.000394466	yes	FALSE
ENSG00000137414	0.349804	2.92163	5e-05	0.000394466	yes	0.324683	2.71138	5e-05	0.000394466	yes	TRUE
ENSG00000137460	-0.529879	-4.51736	5e-05	0.000394466	yes	-0.659131	-5.57329	5e-05	0.000394466	yes	TRUE
ENSG00000137501	1.07278	4.04649	5e-05	0.000394466	yes	0.696379	2.33788	5e-05	0.000394466	yes	FALSE
ENSG00000137563	-0.337521	-2.41032	5e-05	0.000394466	yes	-0.301767	-2.15676	0.0001	0.000748217	yes	FALSE
ENSG00000137601	0.437834	3.21562	5e-05	0.000394466	yes	0.36563	2.8258	5e-05	0.000394466	yes	TRUE
ENSG00000137628	-0.643557	-1.72081	0.00155	0.00824944	yes	-1.51558	-2.08713	5e-05	0.000394466	yes	FALSE
ENSG00000137642	0.404975	1.67296	0.00525	0.0229379	yes	-0.722807	-3.65808	5e-05	0.000394466	yes	FALSE
ENSG00000137673	1.39385	12.7178	5e-05	0.000394466	yes	1.92165	15.9264	5e-05	0.000394466	yes	FALSE
ENSG00000137713	0.353992	1.9446	0.0004	0.00256373	yes	0.400583	2.15928	0.0003	0.00199267	yes	TRUE
ENSG00000137745	2.67829	6.05223	5e-05	0.000394466	yes	1.71265	3.66914	5e-05	0.000394466	yes	FALSE
ENSG00000137804	-0.58038	-3.76728	5e-05	0.000394466	yes	-0.363014	-2.37317	5e-05	0.000394466	yes	FALSE
ENSG00000137821	-0.445223	-1.68905	0.00205	0.010441	yes	-0.413986	-1.61673	0.00295	0.0141872	yes	TRUE
ENSG00000137824	0.274435	2.04224	0.0002	0.00139451	yes	0.28626	2.13908	0.0002	0.00139451	yes	TRUE
ENSG00000137842	0.880864	3.05603	5e-05	0.000394466	yes	0.614913	2.19142	0.00045	0.00285055	yes	TRUE
ENSG00000137872	1.90001	8.66253	5e-05	0.000394466	yes	0.594782	2.40925	5e-05	0.000394466	yes	FALSE
ENSG00000137947	0.417943	3.36244	5e-05	0.000394466	yes	0.393144	3.17739	5e-05	0.000394466	yes	FALSE
ENSG00000137948	1.9874	1.05438	5e-05	0.000394466	yes	1.4214	0.72872	0.0001	0.000748217	yes	FALSE
ENSG00000137976	0.228528	1.60641	0.0051	0.0223992	yes	0.59204	4.17929	5e-05	0.000394466	yes	FALSE
ENSG00000137996	0.406238	3.08285	5e-05	0.000394466	yes	0.227009	1.72288	0.0025	0.0123557	yes	FALSE
ENSG00000138071	0.251381	2.03756	0.0005	0.00312122	yes	0.488363	4.04744	5e-05	0.000394466	yes	FALSE
ENSG00000138160	-0.690746	-5.65443	5e-05	0.000394466	yes	-0.4314	-3.54766	5e-05	0.000394466	yes	FALSE
ENSG00000138166	2.50575	20.095	5e-05	0.000394466	yes	3.75767	29.0565	5e-05	0.000394466	yes	FALSE
ENSG00000138294	-0.495999	-1.61414	0.00385	0.0177672	yes	-0.73629	-2.25235	0.0003	0.00199267	yes	FALSE
ENSG00000138297	0.210539	1.66614	0.00415	0.0188795	yes	0.307323	2.40112	5e-05	0.000394466	yes	FALSE
ENSG00000138336	-0.365834	-2.0553	0.00055	0.00339017	yes	-0.360631	-1.99175	0.00115	0.00640105	yes	FALSE
ENSG00000138459	0.368663	1.78992	0.0021	0.0106535	yes	-1.14152	-4.40609	5e-05	0.000394466	yes	FALSE
ENSG00000138593	0.727889	3.25895	5e-05	0.000394466	yes	0.577104	2.60205	5e-05	0.000394466	yes	TRUE
ENSG00000138604	-0.616216	-3.81	5e-05	0.000394466	yes	-0.413607	-2.46968	5e-05	0.000394466	yes	TRUE
ENSG00000138621	-0.328051	-1.92012	0.001	0.00567333	yes	-0.562482	-2.85769	5e-05	0.000394466	yes	TRUE
ENSG00000138658	-0.838928	-2.53049	5e-05	0.000394466	yes	-0.626146	-1.91041	0.00085	0.00494128	yes	FALSE
ENSG00000138663	0.3346	2.58322	5e-05	0.000394466	yes	0.196465	1.49307	0.0095	0.0376082	yes	TRUE
ENSG00000138668	-0.23845	-1.6342	0.005	0.0220281	yes	0.250686	1.76676	0.00205	0.010441	yes	TRUE
ENSG00000138678	-0.68478	-1.09917	0.0098	0.0385095	yes	-0.936258	-1.38239	0.0009	0.00518136	yes	FALSE
ENSG00000138698	0.282529	1.76196	0.00195	0.0100062	yes	0.519726	3.22578	5e-05	0.000394466	yes	TRUE
ENSG00000138750	0.274661	1.7576	0.0015	0.00802265	yes	0.37743	2.4803	0.0001	0.000748217	yes	TRUE
ENSG00000138756	-0.738465	-2.24588	5e-05	0.000394466	yes	-1.69462	-3.42074	5e-05	0.000394466	yes	TRUE
ENSG00000138760	0.452812	3.15526	5e-05	0.000394466	yes	0.26279	1.86638	0.0004	0.00256373	yes	TRUE
ENSG00000138778	-0.266223	-1.19041	0.00685	0.028723	yes	0.474672	2.40391	5e-05	0.000394466	yes	TRUE
ENSG00000138796	-0.405448	-3.1799	5e-05	0.000394466	yes	-0.292435	-2.29804	0.0001	0.000748217	yes	TRUE
ENSG00000138801	-0.47635	-3.75309	5e-05	0.000394466	yes	-0.618998	-4.7945	5e-05	0.000394466	yes	TRUE
ENSG00000138814	-0.391277	-2.13195	0.0003	0.00199267	yes	-0.883997	-4.44052	5e-05	0.000394466	yes	TRUE
ENSG00000138821	0.31151	2.40767	5e-05	0.000394466	yes	1.17051	9.23787	5e-05	0.000394466	yes	TRUE
ENSG00000139133	-0.322186	-1.98132	0.00195	0.0100062	yes	-0.309392	-2.32548	5e-05	0.000394466	yes	FALSE
ENSG00000139194	0.381557	1.94065	0.00085	0.00494128	yes	-0.406815	-1.75308	0.00185	0.00957288	yes	FALSE
ENSG00000139220	0.546775	2.58264	5e-05	0.000394466	yes	0.752639	3.60363	5e-05	0.000394466	yes	TRUE
ENSG00000139269	-1.7574	-3.90456	5e-05	0.000394466	yes	-2.82221	-3.96631	5e-05	0.000394466	yes	FALSE
ENSG00000139318	1.33714	3.60143	5e-05	0.000394466	yes	0.780508	1.63265	0.002	0.0102249	yes	FALSE
ENSG00000139323	-0.514075	-2.12641	0.00015	0.00108114	yes	-0.665915	-2.51645	5e-05	0.000394466	yes	TRUE
ENSG00000139350	-0.546712	-3.259	5e-05	0.000394466	yes	-0.443884	-2.45419	5e-05	0.000394466	yes	TRUE
ENSG00000139410	-0.447155	-2.89438	5e-05	0.000394466	yes	-1.3159	-7.74782	5e-05	0.000394466	yes	TRUE
ENSG00000139514	-0.335953	-2.18889	0.00015	0.00108114	yes	-0.525393	-3.03829	5e-05	0.000394466	yes	TRUE
ENSG00000139517	1.09858	9.84512	5e-05	0.000394466	yes	0.70715	6.28664	5e-05	0.000394466	yes	TRUE
ENSG00000139618	-0.877554	-4.02166	5e-05	0.000394466	yes	-0.872094	-4.09763	5e-05	0.000394466	yes	FALSE
ENSG00000139675	-0.272292	-2.02315	0.0003	0.00199267	yes	-0.318872	-2.35427	5e-05	0.000394466	yes	FALSE
ENSG00000139734	-0.526693	-4.01705	5e-05	0.000394466	yes	-0.182995	-1.42113	0.01305	0.0486372	yes	TRUE
ENSG00000139800	0.409234	3.00269	5e-05	0.000394466	yes	0.721501	5.43574	5e-05	0.000394466	yes	FALSE
ENSG00000139880	-0.187051	-1.4671	0.01055	0.0408995	yes	-0.315977	-2.41629	5e-05	0.000394466	yes	FALSE
ENSG00000140263	-0.226922	-1.66482	0.00345	0.0162172	yes	-0.253778	-1.86887	0.0009	0.00518136	yes	TRUE
ENSG00000140285	3.20036	0.633441	0.01155	0.0440729	yes	3.38543	0.675626	0.00755	0.0310586	yes	TRUE
ENSG00000140319	0.416959	3.38068	5e-05	0.000394466	yes	0.357706	2.88341	5e-05	0.000394466	yes	FALSE
ENSG00000140374	0.243468	1.91212	0.0007	0.00417041	yes	0.339245	2.64552	5e-05	0.000394466	yes	TRUE
ENSG00000140459	-0.564382	-1.5212	0.00205	0.010441	yes	-1.07729	-2.48909	5e-05	0.000394466	yes	FALSE
ENSG00000140463	0.324377	1.93945	0.00075	0.00442828	yes	0.365895	2.14856	0.0003	0.00199267	yes	TRUE
ENSG00000140465	1.15152	2.57247	5e-05	0.000394466	yes	1.60564	3.80377	5e-05	0.000394466	yes	FALSE
ENSG00000140479	-0.402225	-2.16543	0.0002	0.00139451	yes	-0.8933	-5.02271	5e-05	0.000394466	yes	TRUE
ENSG00000140534	-0.924249	-7.22927	5e-05	0.000394466	yes	-0.258665	-2.08381	0.00025	0.00169574	yes	TRUE
ENSG00000140564	0.372525	2.21301	0.00015	0.00108114	yes	-0.279709	-1.76045	0.0014	0.00756525	yes	FALSE
ENSG00000140600	0.351115	2.20433	0.00015	0.00108114	yes	0.489463	2.87978	5e-05	0.000394466	yes	TRUE
ENSG00000140612	-0.224522	-1.80388	0.0017	0.00891245	yes	0.437526	3.52479	5e-05	0.000394466	yes	TRUE
ENSG00000140740	-0.247201	-1.91605	0.00075	0.00442828	yes	-0.18085	-1.41294	0.0125	0.0469793	yes	FALSE
ENSG00000140848	-0.315882	-2.41049	5e-05	0.000394466	yes	-0.331329	-2.52826	5e-05	0.000394466	yes	FALSE
ENSG00000140854	-0.467219	-2.77356	5e-05	0.000394466	yes	-0.360926	-2.06279	0.00025	0.00169574	yes	FALSE
ENSG00000140995	0.546842	3.48351	5e-05	0.000394466	yes	0.895855	6.11398	5e-05	0.000394466	yes	FALSE
ENSG00000141232	1.15716	8.87901	5e-05	0.000394466	yes	0.927485	7.13731	5e-05	0.000394466	yes	TRUE
ENSG00000141367	0.405273	2.51075	5e-05	0.000394466	yes	0.386634	2.41498	5e-05	0.000394466	yes	TRUE
ENSG00000141384	-0.169562	-1.44526	0.011	0.0423859	yes	0.177622	1.60593	0.00585	0.0251702	yes	TRUE
ENSG00000141401	-0.943093	-7.28216	5e-05	0.000394466	yes	-1.48945	-7.87127	5e-05	0.000394466	yes	FALSE
ENSG00000141447	-0.310143	-1.61873	0.00465	0.0207586	yes	-0.50979	-2.62692	5e-05	0.000394466	yes	TRUE
ENSG00000141458	0.526563	1.89634	0.00125	0.0068727	yes	1.30242	4.62551	5e-05	0.000394466	yes	TRUE
ENSG00000141480	-0.822028	-6.41168	5e-05	0.000394466	yes	-0.396954	-3.24146	5e-05	0.000394466	yes	FALSE
ENSG00000141510	-0.63294	-4.1533	5e-05	0.000394466	yes	-1.23182	-7.31412	5e-05	0.000394466	yes	FALSE
ENSG00000141524	0.370602	1.72074	0.00275	0.0133764	yes	0.415359	2.03921	0.00035	0.00228343	yes	TRUE
ENSG00000141526	0.971082	2.16382	0.0001	0.000748217	yes	1.24211	2.83593	5e-05	0.000394466	yes	TRUE
ENSG00000141551	0.32426	1.95223	0.0004	0.00256373	yes	0.391853	2.3391	5e-05	0.000394466	yes	TRUE
ENSG00000141560	-0.560737	-4.29883	5e-05	0.000394466	yes	-0.265343	-2.03577	0.0003	0.00199267	yes	TRUE
ENSG00000141576	-0.563117	-2.31742	5e-05	0.000394466	yes	-0.462923	-1.74756	0.002	0.0102249	yes	FALSE
ENSG00000141580	0.317432	1.8326	0.001	0.00567333	yes	0.252602	1.41124	0.01005	0.0392746	yes	TRUE
ENSG00000141668	-1.43643	-10.4726	5e-05	0.000394466	yes	-0.37817	-2.72144	5e-05	0.000394466	yes	TRUE
ENSG00000141682	-0.485629	-4.44374	5e-05	0.000394466	yes	-0.422246	-3.69422	5e-05	0.000394466	yes	FALSE
ENSG00000141696	0.233781	1.46801	0.0107	0.041397	yes	0.260161	1.61052	0.00475	0.0211284	yes	FALSE
ENSG00000141858	-0.383856	-2.51007	5e-05	0.000394466	yes	-0.21835	-1.5325	0.0073	0.0302255	yes	FALSE
ENSG00000142065	-0.461016	-2.2891	5e-05	0.000394466	yes	-0.428516	-2.06478	0.00015	0.00108114	yes	FALSE
ENSG00000142089	0.309881	2.48772	5e-05	0.000394466	yes	-0.303057	-2.66302	5e-05	0.000394466	yes	FALSE
ENSG00000142166	0.264952	1.52825	0.0088	0.0352656	yes	0.265296	1.5483	0.0085	0.0343066	yes	FALSE
ENSG00000142186	0.215346	1.56388	0.00665	0.0280372	yes	0.299067	2.16668	0.0002	0.00139451	yes	FALSE
ENSG00000142188	0.36163	1.69939	0.0019	0.00979865	yes	-0.392661	-1.60018	0.0051	0.0223992	yes	TRUE
ENSG00000142230	-0.514901	-3.06812	5e-05	0.000394466	yes	-0.421256	-2.40109	5e-05	0.000394466	yes	TRUE
ENSG00000142515	0.272432	2.24885	5e-05	0.000394466	yes	-0.521555	-4.30682	5e-05	0.000394466	yes	FALSE
ENSG00000142765	-0.222898	-1.81781	0.00235	0.0117337	yes	-0.371478	-2.99142	5e-05	0.000394466	yes	FALSE
ENSG00000142959	1.0534	1.93242	0.00435	0.0196218	yes	1.06832	1.96674	0.00395	0.018135	yes	FALSE
ENSG00000143061	-0.301751	-2.00959	0.0003	0.00199267	yes	-1.23738	-5.99696	5e-05	0.000394466	yes	FALSE
ENSG00000143147	-0.855736	-6.09543	5e-05	0.000394466	yes	-1.2305	-7.97588	5e-05	0.000394466	yes	TRUE
ENSG00000143199	2.30467	3.36791	5e-05	0.000394466	yes	1.74817	2.51992	0.0001	0.000748217	yes	FALSE
ENSG00000143228	-0.741009	-4.69418	5e-05	0.000394466	yes	-0.363138	-2.36362	5e-05	0.000394466	yes	TRUE
ENSG00000143320	0.971397	2.00698	0.00035	0.00228343	yes	1.29558	2.77966	5e-05	0.000394466	yes	FALSE
ENSG00000143365	0.395724	3.50008	5e-05	0.000394466	yes	0.470704	4.21988	5e-05	0.000394466	yes	FALSE
ENSG00000143367	0.186773	1.4855	0.0102	0.0397458	yes	0.382011	2.88473	5e-05	0.000394466	yes	FALSE
ENSG00000143412	1.04025	8.00637	5e-05	0.000394466	yes	0.919959	7.00225	5e-05	0.000394466	yes	FALSE
ENSG00000143457	0.260527	1.5904	0.0051	0.0223992	yes	-0.389618	-2.52387	0.0001	0.000748217	yes	FALSE
ENSG00000143476	-0.986304	-6.74851	5e-05	0.000394466	yes	-0.689835	-3.88918	5e-05	0.000394466	yes	TRUE
ENSG00000143502	0.389729	1.60538	0.0042	0.0190507	yes	-0.744932	-2.81227	5e-05	0.000394466	yes	FALSE
ENSG00000143507	0.477779	3.15203	5e-05	0.000394466	yes	0.329007	1.86385	0.0009	0.00518136	yes	FALSE
ENSG00000143622	0.27426	1.52716	0.008	0.0325998	yes	0.413152	2.42429	0.00015	0.00108114	yes	FALSE
ENSG00000143643	-0.397222	-1.95288	0.00035	0.00228343	yes	-0.842277	-3.79479	5e-05	0.000394466	yes	TRUE
ENSG00000143674	-0.563099	-4.35625	5e-05	0.000394466	yes	-0.803576	-6.17002	5e-05	0.000394466	yes	FALSE
ENSG00000143751	0.377691	3.1224	5e-05	0.000394466	yes	0.342696	2.83181	5e-05	0.000394466	yes	FALSE
ENSG00000143753	0.594437	4.18448	5e-05	0.000394466	yes	0.395011	2.76935	5e-05	0.000394466	yes	TRUE
ENSG00000143774	0.358035	2.87863	5e-05	0.000394466	yes	0.300591	2.37903	5e-05	0.000394466	yes	TRUE
ENSG00000143850	0.446746	2.13396	0.00355	0.0166083	yes	0.225249	1.2401	0.01	0.039115	yes	TRUE
ENSG00000143878	0.739654	6.18877	5e-05	0.000394466	yes	1.03104	8.64489	5e-05	0.000394466	yes	FALSE
ENSG00000144028	0.358596	2.51639	5e-05	0.000394466	yes	0.278136	1.94433	0.0004	0.00256373	yes	FALSE
ENSG00000144115	-0.738811	-4.88227	5e-05	0.000394466	yes	-1.37962	-9.34128	5e-05	0.000394466	yes	TRUE
ENSG00000144118	0.573394	4.72986	5e-05	0.000394466	yes	0.486407	3.77281	5e-05	0.000394466	yes	TRUE
ENSG00000144120	-0.240914	-2.05436	0.0005	0.00312122	yes	0.179886	1.56379	0.00745	0.0307179	yes	FALSE
ENSG00000144136	0.239528	1.53732	0.0069	0.0288933	yes	0.231049	1.49534	0.00765	0.0313907	yes	FALSE
ENSG00000144218	-0.488611	-1.96172	0.00065	0.00390953	yes	0.561874	2.20406	0.00025	0.00169574	yes	TRUE
ENSG00000144339	-0.87788	-6.52392	5e-05	0.000394466	yes	-0.298863	-2.131	0.0004	0.00256373	yes	TRUE
ENSG00000144485	-0.375026	-2.15255	0.0006	0.00365163	yes	-0.949011	-4.79698	5e-05	0.000394466	yes	FALSE
ENSG00000144597	-0.290783	-1.58355	0.006	0.0256898	yes	-0.265454	-1.51709	0.0087	0.0349407	yes	FALSE
ENSG00000144645	0.744442	2.38282	5e-05	0.000394466	yes	-0.778907	-1.77406	0.00045	0.00285055	yes	FALSE
ENSG00000144649	-0.378239	-1.56585	0.00455	0.0203746	yes	-0.691214	-2.96225	5e-05	0.000394466	yes	FALSE
ENSG00000144655	0.23856	2.30806	0.00015	0.00108114	yes	0.239306	2.31681	0.0001	0.000748217	yes	FALSE
ENSG00000144724	-1.05936	-6.86226	5e-05	0.000394466	yes	-2.33087	-11.4404	5e-05	0.000394466	yes	TRUE
ENSG00000144837	-0.774661	-5.88999	5e-05	0.000394466	yes	-0.599015	-4.67188	5e-05	0.000394466	yes	FALSE
ENSG00000144848	0.343616	1.90017	0.0007	0.00417041	yes	0.278088	1.67063	0.00375	0.0173767	yes	TRUE
ENSG00000144867	-0.46167	-2.46836	5e-05	0.000394466	yes	0.454992	2.44754	5e-05	0.000394466	yes	TRUE
ENSG00000144909	-0.507839	-4.59699	5e-05	0.000394466	yes	0.202614	1.92065	0.00065	0.00390953	yes	FALSE
ENSG00000145020	-0.650263	-1.09916	0.008	0.0325998	yes	-1.34579	-1.62808	0.00015	0.00108114	yes	TRUE
ENSG00000145192	-0.75686	-2.17621	0.00035	0.00228343	yes	-0.616687	-1.85104	0.0012	0.00663203	yes	FALSE
ENSG00000145217	0.50512	1.09753	0.0118	0.0448507	yes	0.730544	1.71768	0.00035	0.00228343	yes	FALSE
ENSG00000145220	-0.165085	-1.61159	0.0055	0.0238795	yes	0.592041	5.21174	5e-05	0.000394466	yes	FALSE
ENSG00000145244	0.981951	1.86971	0.00025	0.00169574	yes	1.80127	3.59191	5e-05	0.000394466	yes	TRUE
ENSG00000145247	-0.243241	-2.00482	0.00065	0.00390953	yes	-0.231927	-1.4835	0.01325	0.04925	yes	FALSE
ENSG00000145284	0.399633	3.25782	5e-05	0.000394466	yes	0.331957	2.71613	5e-05	0.000394466	yes	FALSE
ENSG00000145349	0.61409	4.14256	5e-05	0.000394466	yes	1.1299	7.68273	5e-05	0.000394466	yes	FALSE
ENSG00000145386	-0.431157	-2.62371	5e-05	0.000394466	yes	0.233201	1.49176	0.0102	0.0397458	yes	FALSE
ENSG00000145414	-0.290725	-1.82129	0.0014	0.00756525	yes	0.273282	1.70109	0.00305	0.0145908	yes	TRUE
ENSG00000145439	-0.404294	-1.57152	0.0093	0.0369299	yes	-0.45085	-1.84666	0.0024	0.0119296	yes	TRUE
ENSG00000145506	-0.460216	-2.34337	5e-05	0.000394466	yes	-0.523172	-2.35941	0.00015	0.00108114	yes	TRUE
ENSG00000145569	-0.563002	-2.98865	5e-05	0.000394466	yes	-1.05699	-4.97837	5e-05	0.000394466	yes	TRUE
ENSG00000145675	0.246431	1.45824	0.01035	0.0402227	yes	0.622544	3.60673	5e-05	0.000394466	yes	TRUE
ENSG00000145685	0.689948	4.01995	5e-05	0.000394466	yes	0.674614	3.95145	5e-05	0.000394466	yes	FALSE
ENSG00000145687	0.557922	3.79	5e-05	0.000394466	yes	0.50761	3.46412	5e-05	0.000394466	yes	TRUE
ENSG00000145700	-0.838173	-2.96511	5e-05	0.000394466	yes	-1.46469	-4.49623	5e-05	0.000394466	yes	FALSE
ENSG00000145882	-0.924921	-7.66444	5e-05	0.000394466	yes	-1.59617	-12.6787	5e-05	0.000394466	yes	FALSE
ENSG00000145908	-0.619069	-5.04866	5e-05	0.000394466	yes	-0.559735	-4.55565	5e-05	0.000394466	yes	FALSE
ENSG00000145919	-0.500076	-3.85862	5e-05	0.000394466	yes	-0.494378	-3.74596	5e-05	0.000394466	yes	TRUE
ENSG00000145979	0.327868	2.51233	5e-05	0.000394466	yes	0.31451	2.50911	5e-05	0.000394466	yes	FALSE
ENSG00000145982	-0.616859	-4.27346	5e-05	0.000394466	yes	-0.900325	-6.09459	5e-05	0.000394466	yes	TRUE
ENSG00000145990	0.514778	2.96489	5e-05	0.000394466	yes	0.964865	4.49606	5e-05	0.000394466	yes	TRUE
ENSG00000146070	-0.407882	-1.52822	0.0086	0.0346421	yes	-1.11401	-2.76484	5e-05	0.000394466	yes	FALSE
ENSG00000146143	-0.712985	-3.08407	5e-05	0.000394466	yes	-0.468385	-2.12453	0.00015	0.00108114	yes	TRUE
ENSG00000146233	1.31488	4.02135	5e-05	0.000394466	yes	1.13315	3.78318	5e-05	0.000394466	yes	FALSE
ENSG00000146242	-0.581316	-1.6214	0.00515	0.0225883	yes	-0.939382	-2.3407	5e-05	0.000394466	yes	FALSE
ENSG00000146263	-0.558981	-2.17945	0.00035	0.00228343	yes	-0.351088	-1.61241	0.00435	0.0196218	yes	FALSE
ENSG00000146350	-0.247141	-1.46041	0.00955	0.0377414	yes	-0.435891	-2.60821	5e-05	0.000394466	yes	TRUE
ENSG00000146376	0.269256	2.32439	0.0001	0.000748217	yes	-0.192988	-1.83598	0.0009	0.00518136	yes	FALSE
ENSG00000146386	-0.37502	-3.42447	5e-05	0.000394466	yes	-0.176363	-1.63237	0.0042	0.0190507	yes	FALSE
ENSG00000146409	-0.534169	-4.86192	5e-05	0.000394466	yes	-0.246346	-2.28464	0.0001	0.000748217	yes	FALSE
ENSG00000146411	1.04914	5.88976	5e-05	0.000394466	yes	1.30289	6.46569	5e-05	0.000394466	yes	FALSE
ENSG00000146433	0.794973	6.58091	5e-05	0.000394466	yes	0.748298	6.19164	5e-05	0.000394466	yes	TRUE
ENSG00000146476	0.355866	2.88793	5e-05	0.000394466	yes	0.485629	3.97314	5e-05	0.000394466	yes	FALSE
ENSG00000146477	-0.459366	-3.80875	5e-05	0.000394466	yes	-0.393585	-3.26211	5e-05	0.000394466	yes	TRUE
ENSG00000146674	0.447978	2.10689	0.0002	0.00139451	yes	0.925275	4.57609	5e-05	0.000394466	yes	FALSE
ENSG00000146729	-0.321842	-1.49945	0.0117	0.0445317	yes	-0.503144	-2.09803	0.00045	0.00285055	yes	TRUE
ENSG00000146733	-0.483063	-3.2978	5e-05	0.000394466	yes	-0.703858	-4.79475	5e-05	0.000394466	yes	FALSE
ENSG00000146757	-0.265279	-2.05989	0.00035	0.00228343	yes	0.24107	1.8863	0.0007	0.00417041	yes	FALSE
ENSG00000146776	0.588418	1.80934	0.00175	0.0091262	yes	0.495207	1.51747	0.01025	0.0399069	yes	TRUE
ENSG00000146842	-0.260238	-1.77648	0.00145	0.00779664	yes	-0.346501	-2.36892	5e-05	0.000394466	yes	TRUE
ENSG00000146859	2.53147	4.97302	5e-05	0.000394466	yes	1.24001	2.23901	5e-05	0.000394466	yes	TRUE
ENSG00000147003	-0.437399	-1.45712	0.0113	0.0433009	yes	-0.831941	-2.54841	5e-05	0.000394466	yes	FALSE
ENSG00000147121	0.393004	2.49465	5e-05	0.000394466	yes	0.590288	3.55392	5e-05	0.000394466	yes	TRUE
ENSG00000147164	0.276626	1.94922	0.0005	0.00312122	yes	0.287762	2.07925	0.0002	0.00139451	yes	TRUE
ENSG00000147180	-0.833031	-2.17039	5e-05	0.000394466	yes	-1.22452	-3.16312	5e-05	0.000394466	yes	FALSE
ENSG00000147202	-0.387262	-2.93024	5e-05	0.000394466	yes	-0.757282	-6.32668	5e-05	0.000394466	yes	TRUE
ENSG00000147246	0.664459	4.09537	5e-05	0.000394466	yes	-0.349223	-1.85169	0.00095	0.00542971	yes	FALSE
ENSG00000147394	-0.604998	-2.06994	5e-05	0.000394466	yes	-0.797634	-2.17022	0.00015	0.00108114	yes	FALSE
ENSG00000147416	0.204868	1.51475	0.00815	0.033116	yes	0.363805	2.58184	5e-05	0.000394466	yes	TRUE
ENSG00000147419	0.537887	2.16255	0.0003	0.00199267	yes	0.570295	2.30054	5e-05	0.000394466	yes	TRUE
ENSG00000147421	0.287237	1.67701	0.0026	0.0127622	yes	0.724324	4.45377	5e-05	0.000394466	yes	TRUE
ENSG00000147471	0.382443	1.87684	0.0013	0.00709758	yes	0.273578	1.51056	0.0077	0.0315631	yes	FALSE
ENSG00000147676	-0.272688	-2.24166	0.00025	0.00169574	yes	-0.345602	-2.82801	5e-05	0.000394466	yes	TRUE
ENSG00000147677	0.32152	1.77641	0.00235	0.0117337	yes	0.440368	2.41118	5e-05	0.000394466	yes	TRUE
ENSG00000147804	-0.354607	-2.14789	0.00015	0.00108114	yes	-0.530515	-3.1843	5e-05	0.000394466	yes	FALSE
ENSG00000147854	-0.277901	-1.53286	0.0041	0.0186935	yes	-0.334798	-1.78475	0.0015	0.00802265	yes	TRUE
ENSG00000147905	-0.253519	-2.26736	0.0001	0.000748217	yes	0.179708	1.55171	0.00625	0.0265855	yes	TRUE
ENSG00000147996	0.509937	3.76222	5e-05	0.000394466	yes	0.375847	2.55427	5e-05	0.000394466	yes	FALSE
ENSG00000148019	-0.600998	-3.38138	5e-05	0.000394466	yes	-0.247425	-1.45626	0.00985	0.0386484	yes	FALSE
ENSG00000148090	-0.556159	-4.47354	5e-05	0.000394466	yes	-1.34183	-9.87494	5e-05	0.000394466	yes	TRUE
ENSG00000148123	0.495427	2.41359	5e-05	0.000394466	yes	1.38104	7.13731	5e-05	0.000394466	yes	FALSE
ENSG00000148200	0.731663	2.93729	5e-05	0.000394466	yes	0.561033	2.50405	5e-05	0.000394466	yes	FALSE
ENSG00000148225	-0.359648	-2.43684	5e-05	0.000394466	yes	-0.595149	-4.40201	5e-05	0.000394466	yes	FALSE
ENSG00000148229	-0.250571	-1.91665	0.0007	0.00417041	yes	-0.274314	-2.04993	0.00015	0.00108114	yes	FALSE
ENSG00000148411	-0.284983	-2.05864	0.00045	0.00285055	yes	0.225934	1.69596	0.003	0.0143914	yes	TRUE
ENSG00000148426	-0.54237	-2.54335	5e-05	0.000394466	yes	-0.485276	-2.03978	0.0007	0.00417041	yes	TRUE
ENSG00000148606	-0.290231	-2.15808	0.0001	0.000748217	yes	-0.39033	-2.75347	5e-05	0.000394466	yes	TRUE
ENSG00000148660	0.261076	1.71524	0.0026	0.0127622	yes	0.273754	1.86934	0.00145	0.00779664	yes	TRUE
ENSG00000148672	-0.306051	-2.02791	0.0003	0.00199267	yes	-0.416437	-2.79898	5e-05	0.000394466	yes	TRUE
ENSG00000148730	-0.240947	-1.99778	0.00055	0.00339017	yes	-0.265554	-2.20105	5e-05	0.000394466	yes	FALSE
ENSG00000148834	-0.181597	-1.47197	0.0109	0.0420474	yes	-0.265573	-2.14773	0.0002	0.00139451	yes	FALSE
ENSG00000149054	-0.7958	-4.58779	5e-05	0.000394466	yes	-0.291652	-1.54495	0.0072	0.0298829	yes	TRUE
ENSG00000149196	-0.188946	-1.6105	0.00625	0.0265855	yes	-0.351455	-3.01103	5e-05	0.000394466	yes	TRUE
ENSG00000149218	0.272176	2.33014	0.00015	0.00108114	yes	-0.303014	-2.59247	5e-05	0.000394466	yes	TRUE
ENSG00000149260	-0.348004	-1.88741	0.0006	0.00365163	yes	-0.812233	-3.73561	5e-05	0.000394466	yes	TRUE
ENSG00000149269	0.360517	2.27729	5e-05	0.000394466	yes	-0.440947	-2.15602	0.00055	0.00339017	yes	FALSE
ENSG00000149300	-0.517156	-3.37417	5e-05	0.000394466	yes	-0.215298	-1.49813	0.0088	0.0352656	yes	FALSE
ENSG00000149328	-0.403549	-2.53001	5e-05	0.000394466	yes	-0.359374	-1.96402	0.00045	0.00285055	yes	TRUE
ENSG00000149346	-0.273045	-1.93991	0.00055	0.00339017	yes	-0.647533	-4.27682	5e-05	0.000394466	yes	TRUE
ENSG00000149527	1.40533	5.30414	5e-05	0.000394466	yes	0.498212	1.67294	0.0006	0.00365163	yes	TRUE
ENSG00000149548	-0.493082	-3.64761	5e-05	0.000394466	yes	-0.397206	-2.96996	5e-05	0.000394466	yes	TRUE
ENSG00000149577	0.736675	3.44236	5e-05	0.000394466	yes	0.372975	1.78179	0.002	0.0102249	yes	TRUE
ENSG00000149782	-0.253632	-1.66399	0.00485	0.0214903	yes	0.265053	1.73355	0.00315	0.0150018	yes	FALSE
ENSG00000149798	-0.403482	-3.01446	5e-05	0.000394466	yes	0.41271	3.31398	5e-05	0.000394466	yes	FALSE
ENSG00000149925	0.341232	2.55563	5e-05	0.000394466	yes	0.222497	1.6455	0.0034	0.0160162	yes	FALSE
ENSG00000149930	-0.179336	-1.42543	0.01285	0.0480534	yes	0.214203	1.70117	0.00235	0.0117337	yes	TRUE
ENSG00000149932	0.192255	1.52528	0.00805	0.0327698	yes	-0.22475	-1.75979	0.00195	0.0100062	yes	FALSE
ENSG00000150076	1.12498	2.24412	0.0004	0.00256373	yes	1.38499	2.46909	5e-05	0.000394466	yes	TRUE
ENSG00000150361	0.239259	2.16673	0.00015	0.00108114	yes	1.16481	9.79235	5e-05	0.000394466	yes	FALSE
ENSG00000150403	-0.649018	-3.76385	5e-05	0.000394466	yes	-0.901159	-4.79772	5e-05	0.000394466	yes	TRUE
ENSG00000150433	-0.198209	-1.61136	0.00555	0.0240664	yes	-0.442603	-3.55826	5e-05	0.000394466	yes	FALSE
ENSG00000150687	0.788187	3.43961	5e-05	0.000394466	yes	0.456224	1.92241	0.0006	0.00365163	yes	FALSE
ENSG00000150787	0.270459	2.13244	0.0001	0.000748217	yes	-0.240597	-1.99132	0.00065	0.00390953	yes	FALSE
ENSG00000150977	-0.278091	-2.34827	5e-05	0.000394466	yes	0.415498	3.6998	5e-05	0.000394466	yes	FALSE
ENSG00000150995	0.541097	2.33596	5e-05	0.000394466	yes	0.461027	1.90055	0.0003	0.00199267	yes	FALSE
ENSG00000151012	-0.691599	-5.48648	5e-05	0.000394466	yes	-1.40682	-11.1335	5e-05	0.000394466	yes	TRUE
ENSG00000151025	0.658044	3.55936	5e-05	0.000394466	yes	0.515833	2.76826	5e-05	0.000394466	yes	TRUE
ENSG00000151090	-0.765192	-3.29333	5e-05	0.000394466	yes	-0.523678	-2.24825	0.00015	0.00108114	yes	TRUE
ENSG00000151150	0.352247	1.63085	0.00285	0.0137829	yes	0.297943	1.38596	0.0103	0.0400621	yes	TRUE
ENSG00000151151	-0.23965	-2.17991	0.0002	0.00139451	yes	-0.326126	-2.95126	5e-05	0.000394466	yes	FALSE
ENSG00000151224	-0.675734	-2.04989	0.0001	0.000748217	yes	-1.15456	-2.14164	0.00065	0.00390953	yes	FALSE
ENSG00000151229	-0.599128	-2.33118	0.0001	0.000748217	yes	0.372231	1.45171	0.0107	0.041397	yes	FALSE
ENSG00000151239	0.242841	1.40594	0.0129	0.0482046	yes	-0.896565	-5.04824	5e-05	0.000394466	yes	FALSE
ENSG00000151287	-0.287264	-2.41989	5e-05	0.000394466	yes	0.353217	3.09068	5e-05	0.000394466	yes	TRUE
ENSG00000151348	0.220525	1.65156	0.00315	0.0150018	yes	0.19025	1.43375	0.0111	0.042697	yes	TRUE
ENSG00000151353	-0.24703	-1.7403	0.00385	0.0177672	yes	-0.772335	-5.17363	5e-05	0.000394466	yes	TRUE
ENSG00000151500	-0.366226	-3.12529	5e-05	0.000394466	yes	-0.3484	-2.96695	5e-05	0.000394466	yes	FALSE
ENSG00000151693	0.820098	4.45599	5e-05	0.000394466	yes	-0.890555	-3.50514	5e-05	0.000394466	yes	TRUE
ENSG00000151715	1.53544	4.51366	5e-05	0.000394466	yes	0.763421	2.06384	0.00015	0.00108114	yes	FALSE
ENSG00000151725	-0.567521	-3.78548	5e-05	0.000394466	yes	-0.404338	-2.63393	5e-05	0.000394466	yes	TRUE
ENSG00000151726	0.205633	1.64618	0.00355	0.0166083	yes	0.427627	3.46138	5e-05	0.000394466	yes	TRUE
ENSG00000151806	-0.319444	-1.8561	0.0011	0.00616363	yes	-0.293769	-1.67147	0.0044	0.0198021	yes	FALSE
ENSG00000151835	-0.310506	-2.4471	5e-05	0.000394466	yes	0.519852	4.21097	5e-05	0.000394466	yes	TRUE
ENSG00000151849	-0.915415	-3.67141	5e-05	0.000394466	yes	-0.462257	-2.17462	0.00035	0.00228343	yes	TRUE
ENSG00000151876	-0.215251	-1.46933	0.00995	0.0389552	yes	-0.346219	-2.52549	5e-05	0.000394466	yes	TRUE
ENSG00000151883	-0.423689	-1.7599	0.00085	0.00494128	yes	-0.916653	-3.49598	5e-05	0.000394466	yes	FALSE
ENSG00000151929	0.312539	2.95304	5e-05	0.000394466	yes	0.440332	4.11702	5e-05	0.000394466	yes	TRUE
ENSG00000152102	-0.224911	-1.4394	0.0114	0.0436207	yes	-0.539382	-3.40412	5e-05	0.000394466	yes	TRUE
ENSG00000152128	0.433515	1.55792	0.0068	0.0285566	yes	0.496261	1.85495	0.0018	0.00935173	yes	TRUE
ENSG00000152137	2.41909	8.60515	5e-05	0.000394466	yes	1.03786	3.40253	5e-05	0.000394466	yes	FALSE
ENSG00000152214	1.69073	3.22366	5e-05	0.000394466	yes	2.34577	4.56392	5e-05	0.000394466	yes	FALSE
ENSG00000152270	-0.535554	-3.28632	5e-05	0.000394466	yes	-0.652182	-3.79225	5e-05	0.000394466	yes	TRUE
ENSG00000152332	0.319644	2.53733	5e-05	0.000394466	yes	-0.199696	-1.56871	0.00655	0.0276809	yes	FALSE
ENSG00000152454	-0.553434	-4.53377	5e-05	0.000394466	yes	-0.397774	-3.30625	5e-05	0.000394466	yes	FALSE
ENSG00000152455	-0.494438	-2.56134	5e-05	0.000394466	yes	0.438215	2.40351	5e-05	0.000394466	yes	TRUE
ENSG00000152583	1.33807	1.0536	0.00095	0.00542971	yes	1.51227	1.28811	0.00015	0.00108114	yes	FALSE
ENSG00000152620	-0.262415	-2.04293	0.0006	0.00365163	yes	-0.690292	-5.275	5e-05	0.000394466	yes	TRUE
ENSG00000152700	0.520693	2.49936	5e-05	0.000394466	yes	0.435111	2.07827	0.0005	0.00312122	yes	FALSE
ENSG00000152749	-0.552667	-4.8486	5e-05	0.000394466	yes	-0.957346	-8.24246	5e-05	0.000394466	yes	FALSE
ENSG00000152782	-0.297739	-1.63946	0.004	0.0183221	yes	-0.59765	-3.09786	5e-05	0.000394466	yes	FALSE
ENSG00000152894	-0.470532	-1.58772	0.00255	0.0125635	yes	-0.6659	-2.44874	5e-05	0.000394466	yes	FALSE
ENSG00000152952	-0.244135	-1.54962	0.0063	0.0267694	yes	0.645825	3.8031	5e-05	0.000394466	yes	FALSE
ENSG00000152969	-1.47155	-5.71271	5e-05	0.000394466	yes	-2.14366	-5.84652	5e-05	0.000394466	yes	TRUE
ENSG00000153012	-0.546966	-1.77724	0.00145	0.00779664	yes	0.418673	1.5548	0.0068	0.0285566	yes	FALSE
ENSG00000153044	-0.438121	-3.63141	5e-05	0.000394466	yes	-0.176687	-1.56903	0.0065	0.0275095	yes	FALSE
ENSG00000153064	0.578427	2.15919	0.0004	0.00256373	yes	1.0826	3.85259	5e-05	0.000394466	yes	FALSE
ENSG00000153140	-0.205071	-1.5484	0.007	0.029217	yes	-0.935393	-7.5765	5e-05	0.000394466	yes	FALSE
ENSG00000153179	-0.427147	-3.03489	5e-05	0.000394466	yes	-0.60196	-4.32693	5e-05	0.000394466	yes	TRUE
ENSG00000153201	0.815062	3.95913	5e-05	0.000394466	yes	0.606993	2.88683	5e-05	0.000394466	yes	TRUE
ENSG00000153208	0.381746	1.87615	0.00155	0.00824944	yes	-0.330348	-1.53192	0.00735	0.0303984	yes	FALSE
ENSG00000153233	-0.403206	-2.61913	5e-05	0.000394466	yes	-1.04268	-5.91437	5e-05	0.000394466	yes	FALSE
ENSG00000153879	-0.430729	-3.61054	5e-05	0.000394466	yes	-0.830218	-6.91456	5e-05	0.000394466	yes	TRUE
ENSG00000153975	-0.250594	-1.97746	0.0003	0.00199267	yes	0.197027	1.60927	0.0053	0.0231253	yes	FALSE
ENSG00000153982	0.387823	2.4487	5e-05	0.000394466	yes	-0.408167	-2.36844	5e-05	0.000394466	yes	FALSE
ENSG00000154134	-0.230008	-1.53108	0.00785	0.0320641	yes	-1.21893	-6.6616	5e-05	0.000394466	yes	FALSE
ENSG00000154146	-0.975023	-2.89526	5e-05	0.000394466	yes	-0.558599	-1.82559	0.0022	0.0110897	yes	FALSE
ENSG00000154153	0.243404	1.452	0.01155	0.0440729	yes	-1.06646	-6.79017	5e-05	0.000394466	yes	TRUE
ENSG00000154217	-0.421614	-2.22437	0.0002	0.00139451	yes	-0.299159	-1.61704	0.0052	0.0227715	yes	TRUE
ENSG00000154229	0.515799	1.92567	0.0013	0.00709758	yes	0.46077	1.75553	0.00225	0.0113068	yes	TRUE
ENSG00000154447	0.217614	1.59138	0.0026	0.0127622	yes	0.616523	4.54093	5e-05	0.000394466	yes	TRUE
ENSG00000154511	0.63504	4.80869	5e-05	0.000394466	yes	0.732379	5.58761	5e-05	0.000394466	yes	FALSE
ENSG00000154582	0.22326	1.7049	0.0033	0.0156062	yes	0.236877	1.80831	0.00185	0.00957288	yes	FALSE
ENSG00000154640	-0.274005	-2.17051	0.0003	0.00199267	yes	-0.333288	-2.70826	5e-05	0.000394466	yes	FALSE
ENSG00000154710	0.876397	2.22178	0.0003	0.00199267	yes	1.04769	2.66423	5e-05	0.000394466	yes	TRUE
ENSG00000154727	-0.302094	-1.44478	0.0097	0.0381979	yes	-0.373787	-1.70439	0.00295	0.0141872	yes	TRUE
ENSG00000154839	-0.67924	-4.1494	5e-05	0.000394466	yes	-0.377751	-2.51696	5e-05	0.000394466	yes	FALSE
ENSG00000154914	0.696476	5.9528	5e-05	0.000394466	yes	0.929382	7.9866	5e-05	0.000394466	yes	TRUE
ENSG00000154945	0.270538	1.80881	0.00135	0.00733226	yes	0.376234	2.56919	5e-05	0.000394466	yes	FALSE
ENSG00000155008	0.325496	2.48149	5e-05	0.000394466	yes	0.484563	3.74441	5e-05	0.000394466	yes	TRUE
ENSG00000155097	0.491115	2.79266	5e-05	0.000394466	yes	0.326108	1.87504	0.0017	0.00891245	yes	FALSE
ENSG00000155115	0.204926	1.69956	0.0029	0.0139832	yes	0.311955	2.58756	5e-05	0.000394466	yes	FALSE
ENSG00000155130	-0.246935	-2.03143	0.0003	0.00199267	yes	-0.196222	-1.61566	0.0052	0.0227715	yes	FALSE
ENSG00000155158	-0.456917	-2.4468	5e-05	0.000394466	yes	-0.945892	-4.81443	5e-05	0.000394466	yes	FALSE
ENSG00000155254	-0.209626	-1.56664	0.00735	0.0303984	yes	-0.373818	-2.72585	5e-05	0.000394466	yes	FALSE
ENSG00000155366	0.584184	4.64579	5e-05	0.000394466	yes	0.29134	2.33052	5e-05	0.000394466	yes	FALSE
ENSG00000155380	-0.182735	-1.36815	0.0125	0.0469793	yes	-0.347342	-2.58806	5e-05	0.000394466	yes	TRUE
ENSG00000155660	-0.217211	-1.81255	0.00115	0.00640105	yes	0.253288	2.11185	0.0002	0.00139451	yes	TRUE
ENSG00000155729	-0.332685	-1.47963	0.00985	0.0386484	yes	-0.936855	-3.70205	5e-05	0.000394466	yes	FALSE
ENSG00000155792	-0.190741	-1.6624	0.0039	0.0179486	yes	-0.483523	-4.09796	5e-05	0.000394466	yes	TRUE
ENSG00000155827	-0.360877	-2.19909	0.00015	0.00108114	yes	-0.822168	-4.13039	5e-05	0.000394466	yes	FALSE
ENSG00000155858	-0.542474	-4.81456	5e-05	0.000394466	yes	-0.405208	-3.63959	5e-05	0.000394466	yes	FALSE
ENSG00000155975	0.499659	1.42979	0.00595	0.0255172	yes	0.509017	1.42868	0.0063	0.0267694	yes	TRUE
ENSG00000156006	0.982035	2.81756	5e-05	0.000394466	yes	0.585891	1.65236	0.004	0.0183221	yes	TRUE
ENSG00000156096	-0.937363	-4.42893	5e-05	0.000394466	yes	-1.20922	-4.77583	5e-05	0.000394466	yes	FALSE
ENSG00000156103	-1.17942	-4.25186	5e-05	0.000394466	yes	-0.663172	-2.48949	5e-05	0.000394466	yes	TRUE
ENSG00000156284	0.341771	2.42245	5e-05	0.000394466	yes	-0.414516	-2.57787	5e-05	0.000394466	yes	FALSE
ENSG00000156453	0.305123	2.06954	0.0003	0.00199267	yes	0.335965	2.3632	0.00015	0.00108114	yes	FALSE
ENSG00000156504	-0.498368	-2.3911	5e-05	0.000394466	yes	-0.667475	-2.18024	0.00105	0.00591759	yes	FALSE
ENSG00000156642	0.305465	1.99697	0.0004	0.00256373	yes	0.322033	2.1556	0.00025	0.00169574	yes	TRUE
ENSG00000156671	0.332942	2.19549	5e-05	0.000394466	yes	0.228838	1.48992	0.00895	0.0357555	yes	TRUE
ENSG00000156983	0.274777	1.44005	0.0109	0.0420474	yes	0.3733	2.1867	0.0006	0.00365163	yes	TRUE
ENSG00000157077	0.295088	1.62179	0.0051	0.0223992	yes	0.265975	1.56934	0.00785	0.0320641	yes	TRUE
ENSG00000157191	-0.24344	-1.48809	0.0086	0.0346421	yes	-0.252922	-1.60442	0.005	0.0220281	yes	FALSE
ENSG00000157212	-0.288174	-1.7583	0.00215	0.0108713	yes	0.26752	1.62856	0.0037	0.0171896	yes	TRUE
ENSG00000157214	0.376248	2.12142	0.0002	0.00139451	yes	-0.476967	-2.6841	5e-05	0.000394466	yes	TRUE
ENSG00000157456	-0.584442	-4.71702	5e-05	0.000394466	yes	-0.329267	-2.65182	5e-05	0.000394466	yes	FALSE
ENSG00000157483	0.54801	1.75704	0.0041	0.0186935	yes	0.792623	2.43741	5e-05	0.000394466	yes	TRUE
ENSG00000157500	-0.760123	-4.54711	5e-05	0.000394466	yes	-1.76715	-9.44623	5e-05	0.000394466	yes	FALSE
ENSG00000157514	0.240333	1.87569	0.0006	0.00365163	yes	-0.419691	-3.22697	5e-05	0.000394466	yes	FALSE
ENSG00000157613	3.07162	0.962017	0.0006	0.00365163	yes	3.85009	1.22016	0.0001	0.000748217	yes	FALSE
ENSG00000157637	-0.249007	-1.6612	0.0033	0.0156062	yes	-0.525684	-3.48608	5e-05	0.000394466	yes	TRUE
ENSG00000157881	-0.27355	-1.87219	0.001	0.00567333	yes	-0.303967	-1.85352	0.00155	0.00824944	yes	TRUE
ENSG00000158109	0.470826	4.11611	5e-05	0.000394466	yes	0.162254	1.58547	0.00615	0.0262347	yes	TRUE
ENSG00000158163	-0.745608	-2.20189	0.0004	0.00256373	yes	-0.554623	-1.89351	0.0009	0.00518136	yes	FALSE
ENSG00000158164	-0.862391	-7.08478	5e-05	0.000394466	yes	-1.18568	-9.21761	5e-05	0.000394466	yes	FALSE
ENSG00000158169	-0.500646	-2.73886	5e-05	0.000394466	yes	-0.441709	-2.53098	5e-05	0.000394466	yes	TRUE
ENSG00000158201	0.411465	3.2884	5e-05	0.000394466	yes	0.262204	2.07688	0.00035	0.00228343	yes	FALSE
ENSG00000158270	0.701349	6.13141	5e-05	0.000394466	yes	0.380022	3.24445	5e-05	0.000394466	yes	FALSE
ENSG00000158296	-0.769471	-2.58892	5e-05	0.000394466	yes	-1.48379	-3.71383	5e-05	0.000394466	yes	FALSE
ENSG00000158373	-0.805079	-6.78445	5e-05	0.000394466	yes	-0.762561	-6.46537	5e-05	0.000394466	yes	FALSE
ENSG00000158406	-0.546162	-4.10772	5e-05	0.000394466	yes	-0.434633	-3.38039	5e-05	0.000394466	yes	TRUE
ENSG00000158483	-0.333188	-2.45446	5e-05	0.000394466	yes	-0.479033	-3.45527	5e-05	0.000394466	yes	FALSE
ENSG00000158526	0.221822	1.71281	0.00295	0.0141872	yes	0.416925	3.24726	5e-05	0.000394466	yes	FALSE
ENSG00000158623	0.219081	1.74802	0.00235	0.0117337	yes	-0.393567	-2.94638	5e-05	0.000394466	yes	TRUE
ENSG00000158691	-0.219088	-1.81467	0.00175	0.0091262	yes	-0.177445	-1.48365	0.01035	0.0402227	yes	FALSE
ENSG00000158813	-0.459704	-2.58137	5e-05	0.000394466	yes	0.309872	1.90318	0.00095	0.00542971	yes	TRUE
ENSG00000158882	-0.639714	-5.03803	5e-05	0.000394466	yes	0.180566	1.55643	0.0066	0.0278561	yes	FALSE
ENSG00000158966	-0.272469	-1.5115	0.0079	0.0322493	yes	-0.980936	-4.84846	5e-05	0.000394466	yes	FALSE
ENSG00000159069	0.391814	2.82803	5e-05	0.000394466	yes	0.257962	1.84082	0.0011	0.00616363	yes	TRUE
ENSG00000159166	0.210392	1.60685	0.00455	0.0203746	yes	0.379644	2.86665	5e-05	0.000394466	yes	FALSE
ENSG00000159167	0.490243	1.56795	0.0072	0.0298829	yes	-1.26404	-2.45573	5e-05	0.000394466	yes	FALSE
ENSG00000159176	0.292618	2.27	0.0001	0.000748217	yes	0.270399	2.08478	0.00035	0.00228343	yes	FALSE
ENSG00000159182	-0.4936	-4.1311	5e-05	0.000394466	yes	-1.34731	-11.1225	5e-05	0.000394466	yes	FALSE
ENSG00000159256	0.392783	2.04275	0.00065	0.00390953	yes	0.29349	1.41399	0.0094	0.0372629	yes	TRUE
ENSG00000159337	0.923441	2.98978	5e-05	0.000394466	yes	0.427886	1.28133	0.01305	0.0486372	yes	FALSE
ENSG00000159346	0.383529	3.18496	5e-05	0.000394466	yes	0.191707	1.58786	0.00575	0.0248112	yes	FALSE
ENSG00000159348	0.246613	1.94932	0.0006	0.00365163	yes	0.279326	2.1967	5e-05	0.000394466	yes	FALSE
ENSG00000159388	0.198541	1.54933	0.0072	0.0298829	yes	0.961024	7.58275	5e-05	0.000394466	yes	FALSE
ENSG00000159399	-0.341423	-2.25534	5e-05	0.000394466	yes	0.222648	1.59737	0.00345	0.0162172	yes	TRUE
ENSG00000159579	0.525653	3.19167	5e-05	0.000394466	yes	0.507566	3.04591	5e-05	0.000394466	yes	TRUE
ENSG00000159640	1.97012	0.686917	0.0001	0.000748217	yes	2.0582	0.738903	5e-05	0.000394466	yes	FALSE
ENSG00000159674	0.769823	5.56952	5e-05	0.000394466	yes	0.674199	4.90635	5e-05	0.000394466	yes	TRUE
ENSG00000159692	-0.305896	-1.80038	0.0017	0.00891245	yes	0.37752	2.31176	5e-05	0.000394466	yes	TRUE
ENSG00000159720	0.406937	2.99434	5e-05	0.000394466	yes	-0.299753	-2.12069	5e-05	0.000394466	yes	TRUE
ENSG00000159840	0.509556	2.25118	0.0001	0.000748217	yes	0.417564	1.99819	0.0004	0.00256373	yes	FALSE
ENSG00000160007	0.384258	2.32101	5e-05	0.000394466	yes	0.535497	3.09887	5e-05	0.000394466	yes	TRUE
ENSG00000160050	0.232059	1.63043	0.00465	0.0207586	yes	-0.254605	-1.70619	0.00305	0.0145908	yes	TRUE
ENSG00000160058	0.485612	3.10062	5e-05	0.000394466	yes	0.346421	2.23353	0.00015	0.00108114	yes	FALSE
ENSG00000160075	-0.447488	-3.56397	5e-05	0.000394466	yes	-0.546296	-4.321	5e-05	0.000394466	yes	TRUE
ENSG00000160094	-0.540376	-2.21811	5e-05	0.000394466	yes	-0.660768	-2.59603	5e-05	0.000394466	yes	TRUE
ENSG00000160124	-0.230288	-2.00727	0.00065	0.00390953	yes	0.480924	3.79499	5e-05	0.000394466	yes	TRUE
ENSG00000160172	-0.371974	-1.84698	0.0014	0.00756525	yes	-0.667427	-2.93192	5e-05	0.000394466	yes	FALSE
ENSG00000160180	-0.410587	-2.06421	0.00025	0.00169574	yes	-1.19301	-5.2346	5e-05	0.000394466	yes	FALSE
ENSG00000160190	0.85181	4.25137	5e-05	0.000394466	yes	0.591652	3.04855	5e-05	0.000394466	yes	TRUE
ENSG00000160199	0.321395	1.71643	0.00175	0.0091262	yes	0.284287	1.41911	0.0098	0.0385095	yes	TRUE
ENSG00000160201	-0.231606	-1.54591	0.0068	0.0285566	yes	0.254009	1.73756	0.00215	0.0108713	yes	TRUE
ENSG00000160229	-0.935457	-4.35689	5e-05	0.000394466	yes	-0.534907	-2.64388	5e-05	0.000394466	yes	FALSE
ENSG00000160256	0.384428	3.38185	5e-05	0.000394466	yes	0.359802	3.15185	5e-05	0.000394466	yes	TRUE
ENSG00000160282	1.1579	1.04359	0.0059	0.0253499	yes	1.70319	1.51535	0.0004	0.00256373	yes	TRUE
ENSG00000160284	-0.349147	-2.59923	5e-05	0.000394466	yes	-0.22432	-1.69511	0.0031	0.0147981	yes	TRUE
ENSG00000160298	-0.634813	-5.12827	5e-05	0.000394466	yes	-0.618439	-4.96399	5e-05	0.000394466	yes	FALSE
ENSG00000160305	0.397352	2.80007	5e-05	0.000394466	yes	0.327	2.32683	5e-05	0.000394466	yes	TRUE
ENSG00000160326	0.548882	4.80538	5e-05	0.000394466	yes	0.479315	3.99347	5e-05	0.000394466	yes	TRUE
ENSG00000160352	-0.540574	-2.77177	5e-05	0.000394466	yes	-0.430079	-2.20033	5e-05	0.000394466	yes	TRUE
ENSG00000160588	0.472938	3.41713	5e-05	0.000394466	yes	0.312124	2.17257	5e-05	0.000394466	yes	FALSE
ENSG00000160695	0.195191	1.50539	0.00895	0.0357555	yes	-0.204539	-1.58493	0.0058	0.0249997	yes	FALSE
ENSG00000161011	0.782577	4.11007	5e-05	0.000394466	yes	0.395461	2.00296	0.0006	0.00365163	yes	TRUE
ENSG00000161031	1.59478	2.28205	5e-05	0.000394466	yes	1.52589	2.15698	0.00025	0.00169574	yes	FALSE
ENSG00000161040	0.837841	1.57404	0.0057	0.0246243	yes	1.09368	2.11226	0.00045	0.00285055	yes	TRUE
ENSG00000161217	0.328731	1.56301	0.00635	0.0269509	yes	0.389225	1.81523	0.0022	0.0110897	yes	FALSE
ENSG00000161326	0.287503	2.5375	5e-05	0.000394466	yes	0.319368	2.82916	5e-05	0.000394466	yes	FALSE
ENSG00000161513	-0.241774	-2.10471	0.0002	0.00139451	yes	-0.214922	-1.91695	0.00095	0.00542971	yes	FALSE
ENSG00000161671	0.468933	3.87816	5e-05	0.000394466	yes	0.197283	1.62776	0.00395	0.018135	yes	FALSE
ENSG00000162073	-0.507098	-2.33208	5e-05	0.000394466	yes	-0.597755	-2.79327	5e-05	0.000394466	yes	FALSE
ENSG00000162290	-0.665478	-3.81592	5e-05	0.000394466	yes	0.336937	2.02869	0.00055	0.00339017	yes	FALSE
ENSG00000162366	0.366078	1.97804	0.00025	0.00169574	yes	-0.693375	-3.05774	5e-05	0.000394466	yes	FALSE
ENSG00000162368	0.251843	1.83803	0.0016	0.00848051	yes	-0.281322	-2.15727	0.0002	0.00139451	yes	TRUE
ENSG00000162408	0.365003	1.4493	0.01225	0.0462091	yes	0.744448	3.1456	5e-05	0.000394466	yes	TRUE
ENSG00000162409	0.189181	1.51834	0.00715	0.0297132	yes	-0.843052	-7.2351	5e-05	0.000394466	yes	FALSE
ENSG00000162496	0.36541	3.44447	5e-05	0.000394466	yes	-0.361166	-3.25498	5e-05	0.000394466	yes	FALSE
ENSG00000162512	-0.379927	-1.68014	0.00325	0.0154039	yes	-0.76879	-2.91096	5e-05	0.000394466	yes	FALSE
ENSG00000162542	0.318794	2.27755	5e-05	0.000394466	yes	0.243929	1.67405	0.00345	0.0162172	yes	TRUE
ENSG00000162545	1.9624	10.7587	5e-05	0.000394466	yes	0.85631	3.92042	5e-05	0.000394466	yes	FALSE
ENSG00000162607	-0.290357	-2.41593	5e-05	0.000394466	yes	-0.266414	-2.21995	0.0003	0.00199267	yes	TRUE
ENSG00000162614	1.67486	1.37015	0.00085	0.00494128	yes	1.21952	1.01936	0.0107	0.041397	yes	TRUE
ENSG00000162616	0.903122	4.57952	5e-05	0.000394466	yes	0.503731	2.90662	5e-05	0.000394466	yes	TRUE
ENSG00000162623	-0.384587	-2.09015	0.00055	0.00339017	yes	-0.698174	-3.66763	5e-05	0.000394466	yes	FALSE
ENSG00000162627	-0.273583	-2.41714	5e-05	0.000394466	yes	-0.158316	-1.40895	0.01105	0.0425401	yes	FALSE
ENSG00000162645	0.857106	4.08975	5e-05	0.000394466	yes	1.22858	6.12579	5e-05	0.000394466	yes	FALSE
ENSG00000162757	-0.259729	-2.03312	0.00045	0.00285055	yes	-0.383793	-2.96386	5e-05	0.000394466	yes	FALSE
ENSG00000162783	-0.319115	-2.62198	5e-05	0.000394466	yes	0.27797	2.40412	5e-05	0.000394466	yes	FALSE
ENSG00000162814	0.935323	2.73051	5e-05	0.000394466	yes	1.53499	4.98296	5e-05	0.000394466	yes	TRUE
ENSG00000162836	-0.223994	-1.75173	0.002	0.0102249	yes	-0.658455	-4.95608	5e-05	0.000394466	yes	TRUE
ENSG00000162923	0.510343	3.07368	5e-05	0.000394466	yes	0.388883	2.30525	5e-05	0.000394466	yes	FALSE
ENSG00000162999	-1.11951	-2.7405	5e-05	0.000394466	yes	-1.02063	-2.6537	5e-05	0.000394466	yes	FALSE
ENSG00000163002	-0.817215	-6.03492	5e-05	0.000394466	yes	-0.328822	-2.40926	5e-05	0.000394466	yes	TRUE
ENSG00000163029	-0.481135	-2.08488	0.00085	0.00494128	yes	-0.378947	-1.58258	0.0081	0.0329491	yes	FALSE
ENSG00000163053	-0.435732	-3.38769	5e-05	0.000394466	yes	-0.424302	-3.20749	5e-05	0.000394466	yes	FALSE
ENSG00000163083	0.677063	4.37802	5e-05	0.000394466	yes	0.899046	5.96766	5e-05	0.000394466	yes	FALSE
ENSG00000163113	0.29497	1.5576	0.0073	0.0302255	yes	0.346174	1.89976	0.00165	0.00869476	yes	FALSE
ENSG00000163141	1.79238	1.42191	0.00045	0.00285055	yes	2.06859	1.68311	0.00025	0.00169574	yes	FALSE
ENSG00000163171	-0.813071	-4.19387	5e-05	0.000394466	yes	-0.827843	-3.81511	5e-05	0.000394466	yes	FALSE
ENSG00000163257	-0.562945	-3.21797	5e-05	0.000394466	yes	-0.399637	-2.2593	0.00015	0.00108114	yes	FALSE
ENSG00000163344	-0.203877	-1.99723	0.00055	0.00339017	yes	-0.474336	-4.57436	5e-05	0.000394466	yes	FALSE
ENSG00000163349	-0.327899	-2.21217	5e-05	0.000394466	yes	0.293356	1.95518	0.00035	0.00228343	yes	TRUE
ENSG00000163389	-0.377471	-2.27855	5e-05	0.000394466	yes	-0.334448	-1.58725	0.0085	0.0343066	yes	FALSE
ENSG00000163412	0.505031	2.45749	0.0001	0.000748217	yes	0.344316	1.69134	0.00245	0.0121508	yes	FALSE
ENSG00000163435	0.571801	2.02639	0.00065	0.00390953	yes	1.30765	4.7308	5e-05	0.000394466	yes	TRUE
ENSG00000163507	-0.693937	-5.09073	5e-05	0.000394466	yes	-0.196449	-1.66205	0.00395	0.018135	yes	FALSE
ENSG00000163510	0.1831	1.78281	0.0021	0.0106535	yes	0.280468	2.43938	5e-05	0.000394466	yes	FALSE
ENSG00000163513	0.301793	2.39218	5e-05	0.000394466	yes	0.642122	5.21617	5e-05	0.000394466	yes	FALSE
ENSG00000163520	0.486899	3.64303	5e-05	0.000394466	yes	-0.424126	-2.73789	5e-05	0.000394466	yes	FALSE
ENSG00000163528	-0.352593	-3.46879	5e-05	0.000394466	yes	-0.695281	-6.66729	5e-05	0.000394466	yes	FALSE
ENSG00000163535	-0.461065	-2.20606	5e-05	0.000394466	yes	-0.495386	-2.59242	5e-05	0.000394466	yes	FALSE
ENSG00000163536	0.749272	3.97091	5e-05	0.000394466	yes	1.2091	6.33366	5e-05	0.000394466	yes	FALSE
ENSG00000163636	0.311492	2.49247	5e-05	0.000394466	yes	0.279171	2.20431	5e-05	0.000394466	yes	FALSE
ENSG00000163689	-0.776989	-3.77166	5e-05	0.000394466	yes	-1.05528	-4.74902	5e-05	0.000394466	yes	TRUE
ENSG00000163704	-0.269632	-1.48795	0.009	0.0359267	yes	-0.904129	-4.09544	5e-05	0.000394466	yes	TRUE
ENSG00000163754	0.191338	1.40291	0.0121	0.0457679	yes	0.193162	1.40878	0.0129	0.0482046	yes	FALSE
ENSG00000163785	1.16673	5.97374	5e-05	0.000394466	yes	1.27255	6.61374	5e-05	0.000394466	yes	TRUE
ENSG00000163808	-0.886662	-3.36728	5e-05	0.000394466	yes	-0.536636	-2.46419	0.0001	0.000748217	yes	TRUE
ENSG00000163840	-0.597643	-3.47352	5e-05	0.000394466	yes	-0.245614	-1.47759	0.00955	0.0377414	yes	FALSE
ENSG00000163874	0.930633	4.83291	5e-05	0.000394466	yes	0.705941	3.5205	5e-05	0.000394466	yes	FALSE
ENSG00000163875	0.393101	3.08194	5e-05	0.000394466	yes	-0.264561	-2.03516	0.00075	0.00442828	yes	FALSE
ENSG00000163898	1.38244	3.51938	5e-05	0.000394466	yes	0.758515	1.77021	0.0003	0.00199267	yes	FALSE
ENSG00000163950	-0.334929	-2.36803	5e-05	0.000394466	yes	0.193823	1.47031	0.0099	0.0388061	yes	TRUE
ENSG00000163956	0.353594	2.50111	5e-05	0.000394466	yes	0.333562	2.35891	0.0001	0.000748217	yes	TRUE
ENSG00000163960	0.445092	1.70439	0.0032	0.0151942	yes	0.421082	1.55242	0.0087	0.0349407	yes	TRUE
ENSG00000164002	-0.549611	-3.47099	5e-05	0.000394466	yes	-0.235172	-1.48984	0.00965	0.0380578	yes	FALSE
ENSG00000164032	-0.360733	-3.0722	5e-05	0.000394466	yes	0.196657	1.6742	0.0038	0.0175716	yes	FALSE
ENSG00000164040	0.45449	2.87338	5e-05	0.000394466	yes	0.308052	1.93192	0.00065	0.00390953	yes	TRUE
ENSG00000164045	-0.723832	-4.1541	5e-05	0.000394466	yes	0.304461	1.68326	0.00345	0.0162172	yes	FALSE
ENSG00000164066	-0.271659	-1.40197	0.013	0.0485063	yes	-0.255392	-1.37943	0.0121	0.0457679	yes	FALSE
ENSG00000164081	-0.428285	-2.35263	5e-05	0.000394466	yes	-0.418455	-2.216	0.0001	0.000748217	yes	TRUE
ENSG00000164087	-0.547087	-4.95684	5e-05	0.000394466	yes	-0.416627	-3.8056	5e-05	0.000394466	yes	TRUE
ENSG00000164088	-0.697067	-3.91726	5e-05	0.000394466	yes	-1.35119	-6.66422	5e-05	0.000394466	yes	TRUE
ENSG00000164104	-0.890474	-7.28072	5e-05	0.000394466	yes	-0.556106	-4.5477	5e-05	0.000394466	yes	FALSE
ENSG00000164118	-0.489652	-1.98713	0.0006	0.00365163	yes	-0.470228	-2.02388	0.0006	0.00365163	yes	TRUE
ENSG00000164125	0.738526	3.96718	5e-05	0.000394466	yes	-0.374542	-1.95742	0.0004	0.00256373	yes	TRUE
ENSG00000164128	-0.687954	-2.36749	5e-05	0.000394466	yes	-0.688557	-1.77037	0.00085	0.00494128	yes	FALSE
ENSG00000164168	0.291526	1.56083	0.0066	0.0278561	yes	0.559886	2.93011	5e-05	0.000394466	yes	FALSE
ENSG00000164169	0.37218	1.3105	0.01345	0.0498462	yes	0.657953	2.27491	5e-05	0.000394466	yes	TRUE
ENSG00000164175	2.16059	3.76658	5e-05	0.000394466	yes	2.72001	5.07776	5e-05	0.000394466	yes	FALSE
ENSG00000164182	-0.380108	-3.48234	5e-05	0.000394466	yes	-0.187137	-1.72014	0.0017	0.00891245	yes	TRUE
ENSG00000164188	0.521191	2.75057	5e-05	0.000394466	yes	-0.732159	-3.51987	5e-05	0.000394466	yes	FALSE
ENSG00000164199	-0.429229	-1.22703	0.0032	0.0151942	yes	-0.562544	-1.49906	0.0002	0.00139451	yes	TRUE
ENSG00000164237	-0.202366	-1.48245	0.0073	0.0302255	yes	-0.279897	-2.05159	0.0001	0.000748217	yes	TRUE
ENSG00000164292	-0.309221	-1.50608	0.00565	0.0244483	yes	0.317543	1.63308	0.0018	0.00935173	yes	TRUE
ENSG00000164294	-0.602267	-4.28932	5e-05	0.000394466	yes	-1.30752	-7.88349	5e-05	0.000394466	yes	FALSE
ENSG00000164306	-0.419626	-1.40786	0.0128	0.0479053	yes	-0.582632	-1.92134	0.0007	0.00417041	yes	TRUE
ENSG00000164309	1.72552	2.44848	5e-05	0.000394466	yes	1.56776	2.24916	5e-05	0.000394466	yes	TRUE
ENSG00000164332	-0.441314	-3.7521	5e-05	0.000394466	yes	-0.410191	-3.40652	5e-05	0.000394466	yes	FALSE
ENSG00000164398	0.547931	1.32401	0.00175	0.0091262	yes	0.893524	2.21124	5e-05	0.000394466	yes	FALSE
ENSG00000164403	0.531151	1.59997	0.0061	0.0260495	yes	0.863607	2.60197	5e-05	0.000394466	yes	TRUE
ENSG00000164463	0.452604	2.04091	0.0005	0.00312122	yes	-0.670907	-3.10146	5e-05	0.000394466	yes	TRUE
ENSG00000164620	-0.427086	-1.94152	0.0004	0.00256373	yes	0.544975	2.57032	5e-05	0.000394466	yes	FALSE
ENSG00000164649	-0.273758	-1.70281	0.0028	0.0135814	yes	-0.378256	-2.33366	5e-05	0.000394466	yes	TRUE
ENSG00000164654	-0.261422	-1.43611	0.0129	0.0482046	yes	-0.378704	-2.03815	0.0002	0.00139451	yes	FALSE
ENSG00000164707	4.70755	0.95728	0.0007	0.00417041	yes	5.19477	1.05515	0.00045	0.00285055	yes	FALSE
ENSG00000164815	-0.290316	-2.21024	0.0002	0.00139451	yes	-0.237915	-1.83542	0.0012	0.00663203	yes	TRUE
ENSG00000164919	-0.269207	-1.64217	0.00495	0.0218443	yes	-0.487161	-2.90636	5e-05	0.000394466	yes	TRUE
ENSG00000164920	0.242444	1.65887	0.00445	0.0199963	yes	0.541263	3.82595	5e-05	0.000394466	yes	FALSE
ENSG00000164930	-0.207455	-1.61212	0.0048	0.0213063	yes	-0.425139	-3.31928	5e-05	0.000394466	yes	TRUE
ENSG00000164944	0.290403	1.41303	0.01275	0.0477601	yes	0.31383	1.574	0.0069	0.0288933	yes	TRUE
ENSG00000164985	-0.501767	-2.18647	0.00025	0.00169574	yes	-0.382995	-1.61422	0.00555	0.0240664	yes	FALSE
ENSG00000164989	-0.463566	-2.33211	5e-05	0.000394466	yes	-0.681152	-3.22865	5e-05	0.000394466	yes	TRUE
ENSG00000165029	1.23104	7.15521	5e-05	0.000394466	yes	1.27136	7.20386	5e-05	0.000394466	yes	FALSE
ENSG00000165097	0.657876	4.81781	5e-05	0.000394466	yes	0.592722	4.26184	5e-05	0.000394466	yes	TRUE
ENSG00000165102	0.359254	2.21148	5e-05	0.000394466	yes	-0.360215	-2.06976	0.0002	0.00139451	yes	TRUE
ENSG00000165105	0.309008	2.48044	5e-05	0.000394466	yes	-0.300348	-2.41215	5e-05	0.000394466	yes	TRUE
ENSG00000165115	-0.419895	-2.10541	0.00015	0.00108114	yes	-0.560352	-2.96734	5e-05	0.000394466	yes	TRUE
ENSG00000165171	0.194819	1.4643	0.0119	0.0451471	yes	-0.427175	-3.07727	5e-05	0.000394466	yes	FALSE
ENSG00000165209	0.244431	1.68338	0.0026	0.0127622	yes	0.239333	1.70089	0.00295	0.0141872	yes	TRUE
ENSG00000165219	0.307686	1.3034	0.0109	0.0420474	yes	0.347777	1.42644	0.0051	0.0223992	yes	TRUE
ENSG00000165240	0.528089	4.26076	5e-05	0.000394466	yes	0.213889	1.71958	0.00295	0.0141872	yes	FALSE
ENSG00000165244	-0.663732	-5.90846	5e-05	0.000394466	yes	-0.210751	-1.91531	0.00085	0.00494128	yes	FALSE
ENSG00000165246	-1.08388	-4.8818	5e-05	0.000394466	yes	-2.05482	-5.37151	5e-05	0.000394466	yes	TRUE
ENSG00000165300	-1.4927	-4.31705	5e-05	0.000394466	yes	-0.450546	-1.69036	0.0026	0.0127622	yes	FALSE
ENSG00000165304	-0.836647	-7.09815	5e-05	0.000394466	yes	-0.431183	-3.33205	5e-05	0.000394466	yes	TRUE
ENSG00000165312	0.244337	1.84609	0.0016	0.00848051	yes	-0.231108	-1.69302	0.00395	0.018135	yes	FALSE
ENSG00000165389	-0.406127	-2.64587	5e-05	0.000394466	yes	-0.846071	-5.06053	5e-05	0.000394466	yes	TRUE
ENSG00000165417	-0.440828	-2.43549	5e-05	0.000394466	yes	-0.35513	-1.99939	0.00055	0.00339017	yes	FALSE
ENSG00000165424	0.212754	1.47613	0.0099	0.0388061	yes	0.48024	3.4992	5e-05	0.000394466	yes	TRUE
ENSG00000165449	-0.552022	-3.45609	5e-05	0.000394466	yes	-0.87576	-5.14984	5e-05	0.000394466	yes	FALSE
ENSG00000165476	0.375046	3.17261	5e-05	0.000394466	yes	0.363822	3.07747	5e-05	0.000394466	yes	FALSE
ENSG00000165478	2.67915	5.56039	5e-05	0.000394466	yes	1.47949	2.32944	5e-05	0.000394466	yes	FALSE
ENSG00000165480	-0.970174	-5.55498	5e-05	0.000394466	yes	-0.489185	-2.26615	0.0003	0.00199267	yes	FALSE
ENSG00000165496	-0.249071	-2.09427	0.0002	0.00139451	yes	-0.801445	-6.35534	5e-05	0.000394466	yes	FALSE
ENSG00000165591	-1.12156	-5.54744	5e-05	0.000394466	yes	-2.1529	-10.9775	5e-05	0.000394466	yes	TRUE
ENSG00000165630	0.25842	2.06082	5e-05	0.000394466	yes	0.280483	2.25852	0.0001	0.000748217	yes	TRUE
ENSG00000165675	-0.539864	-2.68975	5e-05	0.000394466	yes	-0.637104	-3.43797	5e-05	0.000394466	yes	TRUE
ENSG00000165730	-0.475282	-3.26726	5e-05	0.000394466	yes	-2.09599	-10.4411	5e-05	0.000394466	yes	FALSE
ENSG00000165731	1.18983	2.11675	5e-05	0.000394466	yes	1.89703	3.17959	5e-05	0.000394466	yes	FALSE
ENSG00000165752	-0.298161	-2.37948	0.0001	0.000748217	yes	-0.309769	-2.40586	5e-05	0.000394466	yes	TRUE
ENSG00000165816	-0.57637	-4.45666	5e-05	0.000394466	yes	-1.43865	-9.17008	5e-05	0.000394466	yes	FALSE
ENSG00000165841	-0.256257	-1.43674	0.0109	0.0420474	yes	-0.275586	-1.54403	0.00645	0.0273313	yes	TRUE
ENSG00000165886	0.233862	1.75528	0.003	0.0143914	yes	0.27949	2.10741	0.0003	0.00199267	yes	FALSE
ENSG00000165887	-0.665029	-1.94341	0.0008	0.00468454	yes	-0.792678	-2.20103	0.00025	0.00169574	yes	FALSE
ENSG00000165891	-1.07231	-4.96102	5e-05	0.000394466	yes	-0.771266	-3.2556	5e-05	0.000394466	yes	FALSE
ENSG00000166002	-0.576183	-4.14346	5e-05	0.000394466	yes	-0.628696	-4.14511	5e-05	0.000394466	yes	TRUE
ENSG00000166016	0.46929	3.66928	5e-05	0.000394466	yes	0.747933	6.06654	5e-05	0.000394466	yes	TRUE
ENSG00000166024	-0.654086	-5.68364	5e-05	0.000394466	yes	-0.821094	-7.05768	5e-05	0.000394466	yes	TRUE
ENSG00000166033	-0.59708	-4.77845	5e-05	0.000394466	yes	-1.49759	-10.9917	5e-05	0.000394466	yes	TRUE
ENSG00000166073	-0.255801	-1.71337	0.00265	0.0129582	yes	-0.254867	-1.87304	0.0014	0.00756525	yes	TRUE
ENSG00000166106	0.340105	1.47421	0.01105	0.0425401	yes	-0.583707	-2.15349	0.00045	0.00285055	yes	FALSE
ENSG00000166123	-0.451258	-2.25994	5e-05	0.000394466	yes	-0.595616	-2.95944	5e-05	0.000394466	yes	TRUE
ENSG00000166130	-0.294095	-1.95393	0.0006	0.00365163	yes	0.319747	2.30164	0.0001	0.000748217	yes	FALSE
ENSG00000166145	0.308991	2.10109	0.0001	0.000748217	yes	0.220413	1.45892	0.0101	0.039431	yes	FALSE
ENSG00000166200	0.242745	1.51508	0.00835	0.0337923	yes	0.406809	2.54468	5e-05	0.000394466	yes	FALSE
ENSG00000166272	-0.308826	-2.92028	5e-05	0.000394466	yes	-0.734822	-6.79208	5e-05	0.000394466	yes	TRUE
ENSG00000166311	0.801516	5.30583	5e-05	0.000394466	yes	0.395862	3.09075	5e-05	0.000394466	yes	FALSE
ENSG00000166342	-0.452088	-1.87785	0.001	0.00567333	yes	0.469994	2.0058	0.0006	0.00365163	yes	TRUE
ENSG00000166348	0.877865	3.46291	5e-05	0.000394466	yes	0.795634	3.20629	5e-05	0.000394466	yes	TRUE
ENSG00000166391	0.97452	1.83648	0.0028	0.0135814	yes	1.02441	1.99332	0.00185	0.00957288	yes	FALSE
ENSG00000166402	-0.382702	-2.48513	5e-05	0.000394466	yes	0.313557	2.09843	0.00015	0.00108114	yes	TRUE
ENSG00000166446	0.462579	1.66451	0.0039	0.0179486	yes	0.659816	2.39397	5e-05	0.000394466	yes	TRUE
ENSG00000166471	0.34542	2.0042	0.00065	0.00390953	yes	0.491056	2.8784	5e-05	0.000394466	yes	FALSE
ENSG00000166478	-0.326375	-1.72794	0.00305	0.0145908	yes	-0.420191	-2.15711	0.00015	0.00108114	yes	FALSE
ENSG00000166508	-0.636422	-3.89125	5e-05	0.000394466	yes	-0.249867	-1.57418	0.0046	0.0205619	yes	FALSE
ENSG00000166598	0.190408	1.45505	0.0094	0.0372629	yes	0.495685	3.75506	5e-05	0.000394466	yes	FALSE
ENSG00000166670	1.72523	6.39706	5e-05	0.000394466	yes	2.00555	8.30816	5e-05	0.000394466	yes	FALSE
ENSG00000166707	-1.66874	-1.42363	0.00235	0.0117337	yes	-1.76472	-1.32856	0.0017	0.00891245	yes	FALSE
ENSG00000166750	-0.715271	-3.70626	5e-05	0.000394466	yes	-1.04382	-5.89925	5e-05	0.000394466	yes	FALSE
ENSG00000166797	-0.208997	-1.48146	0.0103	0.0400621	yes	-0.941293	-6.93293	5e-05	0.000394466	yes	FALSE
ENSG00000166821	0.397382	2.51157	5e-05	0.000394466	yes	0.553299	3.43007	5e-05	0.000394466	yes	FALSE
ENSG00000166840	-0.352812	-2.29111	5e-05	0.000394466	yes	-1.14762	-7.28724	5e-05	0.000394466	yes	TRUE
ENSG00000166845	-0.926798	-2.13367	0.00015	0.00108114	yes	-0.652386	-1.78199	0.0015	0.00802265	yes	FALSE
ENSG00000166896	-0.423409	-2.93908	5e-05	0.000394466	yes	-0.412443	-2.87472	5e-05	0.000394466	yes	FALSE
ENSG00000166922	-1.11035	-1.29283	0.00505	0.0222042	yes	-1.02179	-1.24959	0.0072	0.0298829	yes	FALSE
ENSG00000167037	0.899512	2.22501	5e-05	0.000394466	yes	1.03117	2.3223	5e-05	0.000394466	yes	FALSE
ENSG00000167110	0.418641	1.71493	0.00265	0.0129582	yes	0.463945	1.96234	0.00055	0.00339017	yes	FALSE
ENSG00000167193	0.234425	1.89938	0.00105	0.00591759	yes	0.386577	3.10597	5e-05	0.000394466	yes	TRUE
ENSG00000167291	-0.423694	-1.81173	0.0013	0.00709758	yes	-0.759825	-3.19019	5e-05	0.000394466	yes	TRUE
ENSG00000167315	-0.66535	-1.9845	0.00065	0.00390953	yes	-1.65518	-4.40109	5e-05	0.000394466	yes	FALSE
ENSG00000167325	-0.559072	-3.95015	5e-05	0.000394466	yes	-0.313374	-2.23277	0.0001	0.000748217	yes	FALSE
ENSG00000167333	-0.287785	-1.65509	0.00505	0.0222042	yes	-0.604733	-3.39203	5e-05	0.000394466	yes	FALSE
ENSG00000167434	1.55803	2.61504	5e-05	0.000394466	yes	1.02018	1.56156	0.00265	0.0129582	yes	FALSE
ENSG00000167468	-0.224633	-1.8356	0.0013	0.00709758	yes	-0.397744	-3.26064	5e-05	0.000394466	yes	FALSE
ENSG00000167513	-0.914922	-5.39061	5e-05	0.000394466	yes	-0.411913	-2.27447	5e-05	0.000394466	yes	FALSE
ENSG00000167657	0.456586	3.33749	5e-05	0.000394466	yes	0.380571	2.65674	5e-05	0.000394466	yes	TRUE
ENSG00000167695	-0.273175	-1.97321	0.00095	0.00542971	yes	0.363933	2.51479	5e-05	0.000394466	yes	FALSE
ENSG00000167700	-0.225965	-2.06432	0.00025	0.00169574	yes	-0.690036	-5.86729	5e-05	0.000394466	yes	TRUE
ENSG00000167778	0.342835	3.02725	5e-05	0.000394466	yes	0.465697	4.15177	5e-05	0.000394466	yes	TRUE
ENSG00000167987	-0.347183	-2.2715	0.0001	0.000748217	yes	-0.428658	-2.41237	5e-05	0.000394466	yes	TRUE
ENSG00000167996	-0.203244	-1.68382	0.0032	0.0151942	yes	0.276188	2.29061	5e-05	0.000394466	yes	FALSE
ENSG00000168002	-0.261615	-2.0748	0.00035	0.00228343	yes	-0.285146	-2.2563	5e-05	0.000394466	yes	FALSE
ENSG00000168032	0.741523	1.94567	0.00025	0.00169574	yes	0.941214	2.75352	5e-05	0.000394466	yes	FALSE
ENSG00000168067	0.264862	1.68805	0.0037	0.0171896	yes	0.390989	2.39546	5e-05	0.000394466	yes	TRUE
ENSG00000168077	-0.551491	-3.0765	5e-05	0.000394466	yes	-1.186	-5.18214	5e-05	0.000394466	yes	FALSE
ENSG00000168092	-0.622638	-4.27834	5e-05	0.000394466	yes	-0.36782	-2.58917	5e-05	0.000394466	yes	FALSE
ENSG00000168135	-1.54763	-3.08802	5e-05	0.000394466	yes	-0.930949	-2.12978	0.00055	0.00339017	yes	FALSE
ENSG00000168216	0.300999	2.69356	5e-05	0.000394466	yes	-0.224517	-1.92611	0.0008	0.00468454	yes	TRUE
ENSG00000168243	-1.02298	-5.59919	5e-05	0.000394466	yes	-0.617032	-3.38989	5e-05	0.000394466	yes	TRUE
ENSG00000168274	-0.629822	-5.20664	5e-05	0.000394466	yes	-0.629358	-5.20425	5e-05	0.000394466	yes	FALSE
ENSG00000168298	-0.713539	-6.10243	5e-05	0.000394466	yes	-0.50463	-4.31762	5e-05	0.000394466	yes	FALSE
ENSG00000168300	0.226196	1.4935	0.00835	0.0337923	yes	-0.328242	-2.15382	5e-05	0.000394466	yes	TRUE
ENSG00000168329	1.94654	1.2278	0.0015	0.00802265	yes	1.85778	1.14385	0.00245	0.0121508	yes	FALSE
ENSG00000168350	1.19482	3.47293	5e-05	0.000394466	yes	-0.748662	-1.50909	0.01075	0.0415701	yes	TRUE
ENSG00000168405	1.60536	2.03727	0.00015	0.00108114	yes	1.12735	1.42134	0.00545	0.0236884	yes	FALSE
ENSG00000168461	0.419248	1.46843	0.0031	0.0147981	yes	-0.989171	-2.7253	5e-05	0.000394466	yes	FALSE
ENSG00000168476	-0.350855	-2.92064	5e-05	0.000394466	yes	-0.178041	-1.47179	0.00965	0.0380578	yes	FALSE
ENSG00000168528	0.178413	1.55144	0.0074	0.0305641	yes	-0.272234	-2.27838	5e-05	0.000394466	yes	FALSE
ENSG00000168672	-0.751546	-4.50406	5e-05	0.000394466	yes	-0.508673	-2.84759	5e-05	0.000394466	yes	TRUE
ENSG00000168734	-0.524939	-2.85267	5e-05	0.000394466	yes	-0.401316	-1.7569	0.00305	0.0145908	yes	FALSE
ENSG00000168778	-0.188218	-1.56946	0.00585	0.0251702	yes	0.273396	2.34829	5e-05	0.000394466	yes	FALSE
ENSG00000168785	-0.584227	-1.33334	0.00195	0.0100062	yes	-0.883421	-1.67446	0.0005	0.00312122	yes	FALSE
ENSG00000168913	1.023	4.74206	5e-05	0.000394466	yes	0.361997	1.52966	0.00735	0.0303984	yes	FALSE
ENSG00000168930	0.938577	2.1777	0.0005	0.00312122	yes	-1.0586	-1.86358	0.00315	0.0150018	yes	FALSE
ENSG00000168936	-0.269358	-1.8858	0.00075	0.00442828	yes	-0.576712	-4.03634	5e-05	0.000394466	yes	FALSE
ENSG00000168952	-0.652675	-2.73108	5e-05	0.000394466	yes	-1.11834	-4.09199	5e-05	0.000394466	yes	FALSE
ENSG00000168958	-0.213986	-1.49782	0.0088	0.0352656	yes	-0.283595	-1.99427	0.0002	0.00139451	yes	TRUE
ENSG00000169032	0.381714	2.28465	0.0001	0.000748217	yes	0.53015	3.16968	5e-05	0.000394466	yes	TRUE
ENSG00000169047	-1.24188	-1.45992	0.00285	0.0137829	yes	-1.58558	-1.5573	0.00095	0.00542971	yes	FALSE
ENSG00000169064	-1.2257	-4.61875	5e-05	0.000394466	yes	-0.454068	-1.84087	0.00105	0.00591759	yes	FALSE
ENSG00000169084	0.297692	1.81668	0.00155	0.00824944	yes	-0.747814	-4.42575	5e-05	0.000394466	yes	FALSE
ENSG00000169093	-0.357352	-3.09472	5e-05	0.000394466	yes	-0.272073	-2.37358	0.0001	0.000748217	yes	FALSE
ENSG00000169100	-0.251274	-2.0345	0.00025	0.00169574	yes	-0.321041	-2.5759	5e-05	0.000394466	yes	FALSE
ENSG00000169105	-0.231598	-2.06485	0.00025	0.00169574	yes	0.156968	1.44213	0.0124	0.0467017	yes	FALSE
ENSG00000169116	0.617839	3.0683	5e-05	0.000394466	yes	-1.15694	-4.04111	5e-05	0.000394466	yes	FALSE
ENSG00000169129	0.940378	3.85333	5e-05	0.000394466	yes	-0.272841	-1.39919	0.0079	0.0322493	yes	FALSE
ENSG00000169131	-0.218499	-1.91863	0.0009	0.00518136	yes	-0.306924	-2.67451	5e-05	0.000394466	yes	FALSE
ENSG00000169193	-0.390186	-2.21543	0.0001	0.000748217	yes	-0.812617	-4.33046	5e-05	0.000394466	yes	TRUE
ENSG00000169302	-0.812937	-1.42259	0.00505	0.0222042	yes	-1.42394	-2.08277	5e-05	0.000394466	yes	FALSE
ENSG00000169306	-0.568289	-3.4171	5e-05	0.000394466	yes	-0.231722	-1.49259	0.00805	0.0327698	yes	TRUE
ENSG00000169439	1.73924	7.24571	5e-05	0.000394466	yes	1.3349	6.28282	5e-05	0.000394466	yes	FALSE
ENSG00000169504	-0.287188	-2.26221	5e-05	0.000394466	yes	-0.594574	-4.60936	5e-05	0.000394466	yes	TRUE
ENSG00000169507	3.18333	1.67365	5e-05	0.000394466	yes	1.57476	0.758529	0.0103	0.0400621	yes	FALSE
ENSG00000169604	-0.719582	-3.83769	5e-05	0.000394466	yes	-1.1297	-4.70901	5e-05	0.000394466	yes	FALSE
ENSG00000169607	-0.330291	-1.77304	0.0022	0.0110897	yes	-0.272477	-1.52508	0.0072	0.0298829	yes	FALSE
ENSG00000169684	-0.304571	-1.65742	0.0042	0.0190507	yes	-0.289484	-1.60049	0.0053	0.0231253	yes	FALSE
ENSG00000169696	-0.417319	-2.97836	5e-05	0.000394466	yes	-0.83778	-5.37204	5e-05	0.000394466	yes	TRUE
ENSG00000169710	0.309043	1.42148	0.01035	0.0402227	yes	1.07044	5.06748	5e-05	0.000394466	yes	TRUE
ENSG00000169727	0.26019	1.87875	0.0009	0.00518136	yes	0.23083	1.65349	0.00405	0.0185143	yes	TRUE
ENSG00000169756	0.375343	2.6689	5e-05	0.000394466	yes	0.33568	2.39401	5e-05	0.000394466	yes	TRUE
ENSG00000169760	-0.351088	-1.40438	0.0117	0.0445317	yes	0.817969	3.14735	5e-05	0.000394466	yes	TRUE
ENSG00000169895	0.37478	1.84045	0.0023	0.0115225	yes	0.497431	2.46827	5e-05	0.000394466	yes	TRUE
ENSG00000169914	-0.710144	-2.3039	0.0001	0.000748217	yes	-0.809057	-1.84733	0.00245	0.0121508	yes	TRUE
ENSG00000169989	-0.430938	-1.82065	0.0024	0.0119296	yes	-0.545276	-2.25226	0.0002	0.00139451	yes	TRUE
ENSG00000170011	0.243458	1.94132	0.0008	0.00468454	yes	-0.276037	-2.18934	5e-05	0.000394466	yes	TRUE
ENSG00000170044	-0.322125	-1.98247	0.00045	0.00285055	yes	-0.420728	-2.51098	5e-05	0.000394466	yes	FALSE
ENSG00000170074	2.42176	0.970579	5e-05	0.000394466	yes	1.63005	0.623762	0.00055	0.00339017	yes	FALSE
ENSG00000170089	-0.275854	-2.17088	0.0002	0.00139451	yes	0.429262	3.60874	5e-05	0.000394466	yes	TRUE
ENSG00000170113	0.29441	1.42786	0.01085	0.0418866	yes	0.418203	2.08233	0.00035	0.00228343	yes	TRUE
ENSG00000170122	-0.61359	-3.83549	5e-05	0.000394466	yes	-0.708031	-4.34178	5e-05	0.000394466	yes	TRUE
ENSG00000170160	1.22302	2.11843	0.00015	0.00108114	yes	1.22314	2.15637	0.00015	0.00108114	yes	FALSE
ENSG00000170231	-0.775564	-1.94616	0.0006	0.00365163	yes	-1.16714	-2.54227	5e-05	0.000394466	yes	FALSE
ENSG00000170322	0.806273	4.27418	5e-05	0.000394466	yes	0.812152	4.2641	5e-05	0.000394466	yes	TRUE
ENSG00000170324	-0.403914	-1.82026	0.00285	0.0137829	yes	-0.493613	-2.65098	5e-05	0.000394466	yes	TRUE
ENSG00000170340	0.30048	2.6005	5e-05	0.000394466	yes	0.397943	3.41771	5e-05	0.000394466	yes	FALSE
ENSG00000170345	2.06019	14.2493	5e-05	0.000394466	yes	-1.044	-6.35079	5e-05	0.000394466	yes	FALSE
ENSG00000170348	0.400865	2.04293	0.0003	0.00199267	yes	-0.353721	-1.76282	0.00235	0.0117337	yes	TRUE
ENSG00000170373	1.45046	2.14855	0.0008	0.00468454	yes	2.50395	3.96743	5e-05	0.000394466	yes	FALSE
ENSG00000170412	0.250684	1.87265	0.00085	0.00494128	yes	-0.236221	-1.6605	0.00325	0.0154039	yes	TRUE
ENSG00000170454	1.72216	6.82556	5e-05	0.000394466	yes	-1.28675	-3.1465	5e-05	0.000394466	yes	FALSE
ENSG00000170464	-0.347473	-1.60357	0.0052	0.0227715	yes	-0.856141	-4.11142	5e-05	0.000394466	yes	FALSE
ENSG00000170500	0.415416	1.66934	0.0048	0.0213063	yes	0.758027	2.92584	5e-05	0.000394466	yes	FALSE
ENSG00000170525	-0.233825	-1.43924	0.0042	0.0190507	yes	0.312256	2.07861	5e-05	0.000394466	yes	TRUE
ENSG00000170689	-0.470682	-2.28575	5e-05	0.000394466	yes	-0.876429	-3.88106	5e-05	0.000394466	yes	FALSE
ENSG00000170745	-0.509647	-3.49484	5e-05	0.000394466	yes	-0.334801	-2.26649	5e-05	0.000394466	yes	TRUE
ENSG00000170899	-0.478083	-3.87859	5e-05	0.000394466	yes	-0.381231	-3.14539	5e-05	0.000394466	yes	FALSE
ENSG00000171017	0.45673	1.67216	0.0036	0.0168082	yes	0.407523	1.65519	0.0072	0.0298829	yes	FALSE
ENSG00000171084	-0.2509	-1.43143	0.0125	0.0469793	yes	-0.43552	-2.40939	5e-05	0.000394466	yes	FALSE
ENSG00000171119	-0.625316	-2.16417	0.0005	0.00312122	yes	-0.67011	-2.28763	0.0003	0.00199267	yes	FALSE
ENSG00000171219	0.236491	1.34074	0.01335	0.0495552	yes	0.300004	1.47379	0.00865	0.0347903	yes	FALSE
ENSG00000171236	0.350029	1.50419	0.0075	0.0308919	yes	1.3802	6.26708	5e-05	0.000394466	yes	FALSE
ENSG00000171314	-0.859125	-6.76929	5e-05	0.000394466	yes	0.427122	3.47616	5e-05	0.000394466	yes	FALSE
ENSG00000171345	0.863411	2.93754	5e-05	0.000394466	yes	0.505344	1.59756	0.00255	0.0125635	yes	FALSE
ENSG00000171365	0.46021	1.60782	0.00605	0.0258719	yes	0.538698	2.03478	0.00075	0.00442828	yes	TRUE
ENSG00000171428	0.749519	4.77517	5e-05	0.000394466	yes	0.57482	3.74369	5e-05	0.000394466	yes	FALSE
ENSG00000171435	-0.361634	-1.24525	0.01285	0.0480534	yes	-0.363457	-1.23213	0.0131	0.0488071	yes	TRUE
ENSG00000171448	0.428941	3.51615	5e-05	0.000394466	yes	0.504542	4.02334	5e-05	0.000394466	yes	FALSE
ENSG00000171451	-0.738853	-6.22595	5e-05	0.000394466	yes	-0.540028	-4.54942	5e-05	0.000394466	yes	FALSE
ENSG00000171492	-0.327361	-1.90583	0.00095	0.00542971	yes	-0.719067	-3.88868	5e-05	0.000394466	yes	TRUE
ENSG00000171517	-0.492465	-3.85152	5e-05	0.000394466	yes	-0.569945	-4.44664	5e-05	0.000394466	yes	TRUE
ENSG00000171604	0.348348	2.34667	5e-05	0.000394466	yes	0.625363	4.31793	5e-05	0.000394466	yes	TRUE
ENSG00000171791	-0.525748	-1.78952	0.002	0.0102249	yes	-0.739964	-2.29418	0.00055	0.00339017	yes	FALSE
ENSG00000171798	-0.695669	-1.56817	0.0071	0.0295431	yes	-0.838093	-1.64944	0.0052	0.0227715	yes	TRUE
ENSG00000171813	0.213915	1.89419	0.0008	0.00468454	yes	0.260547	2.34811	0.0001	0.000748217	yes	TRUE
ENSG00000171823	-0.36008	-1.84442	0.00115	0.00640105	yes	-0.565636	-2.82395	5e-05	0.000394466	yes	FALSE
ENSG00000171848	-0.891551	-4.88001	5e-05	0.000394466	yes	-0.666088	-3.8184	5e-05	0.000394466	yes	FALSE
ENSG00000171903	0.879611	6.9786	5e-05	0.000394466	yes	0.565726	4.36784	5e-05	0.000394466	yes	TRUE
ENSG00000171928	0.206968	1.49661	0.0093	0.0369299	yes	0.475317	3.38938	5e-05	0.000394466	yes	TRUE
ENSG00000171960	-0.468565	-4.20651	5e-05	0.000394466	yes	0.303902	2.894	5e-05	0.000394466	yes	FALSE
ENSG00000172057	0.342298	1.68597	0.00355	0.0166083	yes	0.438714	2.19381	0.0002	0.00139451	yes	FALSE
ENSG00000172086	0.239592	1.95669	0.0005	0.00312122	yes	-0.584726	-4.4992	5e-05	0.000394466	yes	FALSE
ENSG00000172175	0.361504	2.37699	5e-05	0.000394466	yes	0.448956	3.07101	5e-05	0.000394466	yes	TRUE
ENSG00000172216	-0.270982	-2.6273	5e-05	0.000394466	yes	-0.923365	-8.56503	5e-05	0.000394466	yes	FALSE
ENSG00000172244	-0.768335	-3.17708	5e-05	0.000394466	yes	-0.923356	-3.90025	5e-05	0.000394466	yes	FALSE
ENSG00000172366	-0.204852	-1.62262	0.00625	0.0265855	yes	-0.232258	-1.83399	0.00175	0.0091262	yes	FALSE
ENSG00000172382	0.498156	3.34896	5e-05	0.000394466	yes	0.24938	1.63809	0.00435	0.0196218	yes	FALSE
ENSG00000172469	1.1598	7.64213	5e-05	0.000394466	yes	0.357996	2.35284	5e-05	0.000394466	yes	FALSE
ENSG00000172478	0.464902	1.65823	0.00295	0.0141872	yes	2.55012	10.476	5e-05	0.000394466	yes	TRUE
ENSG00000172482	1.19838	4.22622	5e-05	0.000394466	yes	0.648081	2.09673	5e-05	0.000394466	yes	FALSE
ENSG00000172594	0.484368	3.94139	5e-05	0.000394466	yes	-0.23969	-1.86879	0.0007	0.00417041	yes	FALSE
ENSG00000172771	-0.523168	-2.69464	5e-05	0.000394466	yes	-0.718184	-3.50449	5e-05	0.000394466	yes	FALSE
ENSG00000172775	-0.275058	-1.73847	0.0022	0.0110897	yes	-0.645189	-4.04492	5e-05	0.000394466	yes	TRUE
ENSG00000172893	0.369827	2.7041	5e-05	0.000394466	yes	0.50808	3.56364	5e-05	0.000394466	yes	FALSE
ENSG00000173156	0.235384	2.3076	5e-05	0.000394466	yes	0.368112	3.17941	5e-05	0.000394466	yes	FALSE
ENSG00000173207	-0.800542	-7.47291	5e-05	0.000394466	yes	-0.619316	-5.84949	5e-05	0.000394466	yes	FALSE
ENSG00000173212	1.15854	2.84238	5e-05	0.000394466	yes	1.78449	3.90136	5e-05	0.000394466	yes	FALSE
ENSG00000173213	-0.965246	-1.67854	0.0023	0.0115225	yes	-1.0792	-1.88472	0.0005	0.00312122	yes	FALSE
ENSG00000173267	0.435797	3.43812	5e-05	0.000394466	yes	-0.287384	-2.10579	0.00035	0.00228343	yes	FALSE
ENSG00000173295	-0.560802	-1.87525	0.0016	0.00848051	yes	-1.25558	-3.84617	5e-05	0.000394466	yes	FALSE
ENSG00000173349	-0.471505	-1.67914	0.004	0.0183221	yes	-0.885213	-2.71724	5e-05	0.000394466	yes	TRUE
ENSG00000173418	0.237396	1.96268	0.00055	0.00339017	yes	0.175881	1.44888	0.0089	0.0355916	yes	TRUE
ENSG00000173482	0.46729	1.887	0.0008	0.00468454	yes	-0.451593	-2.03086	0.00045	0.00285055	yes	TRUE
ENSG00000173581	0.354532	1.91191	0.00065	0.00390953	yes	0.414859	2.29184	0.0002	0.00139451	yes	FALSE
ENSG00000173598	0.797545	4.41352	5e-05	0.000394466	yes	1.45224	8.13471	5e-05	0.000394466	yes	TRUE
ENSG00000173812	-0.274117	-1.68144	0.0036	0.0168082	yes	-0.502245	-3.03201	5e-05	0.000394466	yes	FALSE
ENSG00000173852	-0.843924	-1.94561	5e-05	0.000394466	yes	-0.601346	-1.52267	0.00455	0.0203746	yes	FALSE
ENSG00000173926	0.497241	2.13801	0.00015	0.00108114	yes	0.76141	2.82587	5e-05	0.000394466	yes	FALSE
ENSG00000173933	0.334757	2.0443	0.00055	0.00339017	yes	0.447957	2.75033	5e-05	0.000394466	yes	TRUE
ENSG00000173947	0.421969	1.8309	0.00165	0.00869476	yes	0.674667	2.82949	5e-05	0.000394466	yes	FALSE
ENSG00000173950	-0.849766	-5.60484	5e-05	0.000394466	yes	-1.54668	-8.59388	5e-05	0.000394466	yes	TRUE
ENSG00000174109	0.288361	2.59833	5e-05	0.000394466	yes	0.223628	2.22936	0.0001	0.000748217	yes	FALSE
ENSG00000174137	-0.794971	-3.09969	5e-05	0.000394466	yes	-1.49671	-4.73403	5e-05	0.000394466	yes	TRUE
ENSG00000174206	-0.235133	-1.69867	0.00315	0.0150018	yes	-0.704117	-4.86511	5e-05	0.000394466	yes	FALSE
ENSG00000174238	0.302668	1.55811	0.00715	0.0297132	yes	0.36465	1.88091	0.0013	0.00709758	yes	TRUE
ENSG00000174243	0.265274	1.77915	0.0007	0.00417041	yes	0.287525	1.95043	0.00025	0.00169574	yes	FALSE
ENSG00000174358	4.17594	10.3262	5e-05	0.000394466	yes	3.58417	8.78913	5e-05	0.000394466	yes	FALSE
ENSG00000174405	0.349333	2.80057	5e-05	0.000394466	yes	0.224649	1.7989	0.00185	0.00957288	yes	FALSE
ENSG00000174469	-1.0037	-5.42444	5e-05	0.000394466	yes	-0.538708	-2.87571	5e-05	0.000394466	yes	FALSE
ENSG00000174473	-0.693854	-1.60894	0.002	0.0102249	yes	0.544917	1.49743	0.00475	0.0211284	yes	FALSE
ENSG00000174501	0.279053	1.7603	0.0022	0.0110897	yes	0.561342	3.47098	5e-05	0.000394466	yes	FALSE
ENSG00000174529	-1.10179	-4.04428	5e-05	0.000394466	yes	-0.942873	-3.5942	5e-05	0.000394466	yes	TRUE
ENSG00000174547	-0.354384	-2.71229	5e-05	0.000394466	yes	0.21919	1.71595	0.00255	0.0125635	yes	FALSE
ENSG00000174606	-0.284319	-1.49274	0.00905	0.0360925	yes	-0.284381	-1.50512	0.00865	0.0347903	yes	TRUE
ENSG00000174669	-0.19766	-1.77435	0.00215	0.0108713	yes	-0.201532	-1.79803	0.002	0.0102249	yes	FALSE
ENSG00000174672	0.634653	1.44247	0.005	0.0220281	yes	1.53242	3.69072	5e-05	0.000394466	yes	FALSE
ENSG00000174684	0.425672	3.52007	5e-05	0.000394466	yes	0.385704	3.18752	5e-05	0.000394466	yes	FALSE
ENSG00000174721	-0.323787	-2.14031	0.00035	0.00228343	yes	-0.51345	-3.26916	5e-05	0.000394466	yes	FALSE
ENSG00000174799	-0.498093	-2.59977	5e-05	0.000394466	yes	-0.311124	-1.48657	0.00855	0.0344758	yes	FALSE
ENSG00000174915	-0.32758	-2.24535	5e-05	0.000394466	yes	-0.360492	-2.35325	5e-05	0.000394466	yes	TRUE
ENSG00000174951	-0.299553	-2.23896	5e-05	0.000394466	yes	-0.841468	-5.87618	5e-05	0.000394466	yes	FALSE
ENSG00000175063	-0.92335	-7.90516	5e-05	0.000394466	yes	-0.631769	-5.51781	5e-05	0.000394466	yes	FALSE
ENSG00000175130	-0.37	-3.13876	5e-05	0.000394466	yes	-0.259808	-2.20588	0.0002	0.00139451	yes	FALSE
ENSG00000175155	0.566148	2.80952	5e-05	0.000394466	yes	0.588348	2.93592	5e-05	0.000394466	yes	TRUE
ENSG00000175161	1.51412	3.25703	5e-05	0.000394466	yes	1.75095	4.02217	5e-05	0.000394466	yes	FALSE
ENSG00000175318	1.56955	2.46653	5e-05	0.000394466	yes	2.13032	3.39698	5e-05	0.000394466	yes	FALSE
ENSG00000175336	0.469247	2.58704	5e-05	0.000394466	yes	-0.489102	-2.28042	0.00025	0.00169574	yes	FALSE
ENSG00000175344	0.31659	1.6675	0.00385	0.0177672	yes	0.470559	2.53735	5e-05	0.000394466	yes	TRUE
ENSG00000175395	-0.717532	-5.86393	5e-05	0.000394466	yes	-1.41382	-10.4206	5e-05	0.000394466	yes	TRUE
ENSG00000175573	0.171141	1.47309	0.0108	0.0417314	yes	-0.431585	-3.51606	5e-05	0.000394466	yes	FALSE
ENSG00000175602	-0.293287	-2.38807	5e-05	0.000394466	yes	-0.257209	-2.09646	0.0001	0.000748217	yes	FALSE
ENSG00000175634	0.265861	1.91765	0.00055	0.00339017	yes	0.350065	2.52809	5e-05	0.000394466	yes	TRUE
ENSG00000175707	0.187115	1.71835	0.00285	0.0137829	yes	0.188811	1.73382	0.00265	0.0129582	yes	TRUE
ENSG00000175745	-0.771412	-2.74566	5e-05	0.000394466	yes	0.464876	1.74275	0.00205	0.010441	yes	FALSE
ENSG00000175873	-0.846339	-1.93793	0.0015	0.00802265	yes	-1.6679	-3.14698	0.0001	0.000748217	yes	FALSE
ENSG00000176046	-0.258615	-2.13615	0.00015	0.00108114	yes	-0.63833	-5.24037	5e-05	0.000394466	yes	FALSE
ENSG00000176055	-0.281977	-1.99541	0.00055	0.00339017	yes	-0.529603	-3.35303	5e-05	0.000394466	yes	TRUE
ENSG00000176155	-0.242492	-1.52455	0.0074	0.0305641	yes	-0.425021	-2.62924	5e-05	0.000394466	yes	TRUE
ENSG00000176171	0.884356	7.43609	5e-05	0.000394466	yes	0.286275	2.39654	5e-05	0.000394466	yes	TRUE
ENSG00000176222	0.90512	1.67617	0.00595	0.0255172	yes	0.933595	1.64379	0.0048	0.0213063	yes	FALSE
ENSG00000176244	-0.340951	-1.37697	0.0133	0.0493927	yes	-0.422411	-1.67811	0.00245	0.0121508	yes	FALSE
ENSG00000176273	-0.340085	-2.72204	5e-05	0.000394466	yes	-0.283075	-2.27018	0.00015	0.00108114	yes	FALSE
ENSG00000176390	-0.360538	-2.00367	0.0011	0.00616363	yes	0.313832	1.59017	0.0048	0.0213063	yes	FALSE
ENSG00000176422	0.833035	5.8016	5e-05	0.000394466	yes	0.650098	4.43638	5e-05	0.000394466	yes	FALSE
ENSG00000176595	-0.299683	-2.85654	5e-05	0.000394466	yes	-0.338684	-3.20582	5e-05	0.000394466	yes	TRUE
ENSG00000176809	1.6732	2.05713	5e-05	0.000394466	yes	1.11706	1.31484	0.00195	0.0100062	yes	FALSE
ENSG00000176971	-0.504971	-1.81068	0.0022	0.0110897	yes	-2.88716	-5.46819	5e-05	0.000394466	yes	FALSE
ENSG00000176986	0.33414	2.19098	0.00015	0.00108114	yes	0.403432	2.71703	5e-05	0.000394466	yes	TRUE
ENSG00000176988	-0.580802	-1.42624	0.0103	0.0400621	yes	-0.634923	-1.54462	0.00565	0.0244483	yes	FALSE
ENSG00000177144	0.801931	3.07326	5e-05	0.000394466	yes	1.38891	5.70597	5e-05	0.000394466	yes	FALSE
ENSG00000177181	0.454854	1.59574	0.0111	0.042697	yes	0.394984	1.73263	0.00335	0.0158116	yes	FALSE
ENSG00000177283	-0.565198	-3.74943	5e-05	0.000394466	yes	-1.2793	-7.23176	5e-05	0.000394466	yes	FALSE
ENSG00000177410	-0.495134	-2.37371	5e-05	0.000394466	yes	-0.584265	-2.6762	5e-05	0.000394466	yes	FALSE
ENSG00000177426	-0.275315	-2.16399	0.0001	0.000748217	yes	-0.519676	-3.97893	5e-05	0.000394466	yes	TRUE
ENSG00000177570	-0.631761	-2.22662	0.0005	0.00312122	yes	-0.722648	-1.91757	0.0035	0.016423	yes	FALSE
ENSG00000177606	0.249868	2.06586	0.0002	0.00139451	yes	-0.866893	-7.8161	5e-05	0.000394466	yes	FALSE
ENSG00000177614	-1.45244	-1.72772	0.00115	0.00640105	yes	-3.15756	-1.90053	5e-05	0.000394466	yes	FALSE
ENSG00000177885	0.443917	2.32437	5e-05	0.000394466	yes	0.43596	2.22174	0.0001	0.000748217	yes	TRUE
ENSG00000177932	-0.20559	-1.66244	0.0032	0.0151942	yes	-0.315638	-2.54492	5e-05	0.000394466	yes	FALSE
ENSG00000178038	0.906474	2.07596	0.0002	0.00139451	yes	0.630302	1.41905	0.0069	0.0288933	yes	FALSE
ENSG00000178075	0.708561	3.269	5e-05	0.000394466	yes	0.394547	2.09046	5e-05	0.000394466	yes	FALSE
ENSG00000178127	0.280918	2.10384	0.0002	0.00139451	yes	0.270747	2.01904	0.0003	0.00199267	yes	TRUE
ENSG00000178187	-0.397199	-2.514	5e-05	0.000394466	yes	-0.594081	-3.81058	5e-05	0.000394466	yes	TRUE
ENSG00000178307	0.371855	2.97447	5e-05	0.000394466	yes	0.464965	3.68669	5e-05	0.000394466	yes	TRUE
ENSG00000178385	0.354314	2.58304	5e-05	0.000394466	yes	-0.284013	-2.03932	0.0003	0.00199267	yes	TRUE
ENSG00000178409	-0.453225	-3.90263	5e-05	0.000394466	yes	-0.207184	-1.82746	0.00115	0.00640105	yes	FALSE
ENSG00000178445	-0.379818	-2.94514	5e-05	0.000394466	yes	-0.288569	-2.21388	0.00015	0.00108114	yes	TRUE
ENSG00000178537	0.385041	3.05595	5e-05	0.000394466	yes	0.190886	1.61587	0.0048	0.0213063	yes	FALSE
ENSG00000178573	-0.636506	-2.19973	0.00035	0.00228343	yes	-0.677853	-2.2856	5e-05	0.000394466	yes	TRUE
ENSG00000178752	-0.466365	-1.42372	0.01225	0.0462091	yes	-1.61163	-4.01326	5e-05	0.000394466	yes	FALSE
ENSG00000178917	-0.205134	-1.50569	0.00765	0.0313907	yes	-0.200693	-1.49642	0.00965	0.0380578	yes	FALSE
ENSG00000178947	-0.255744	-1.69916	0.0026	0.0127622	yes	-0.670362	-4.11873	5e-05	0.000394466	yes	FALSE
ENSG00000178977	0.385217	1.67205	0.00505	0.0222042	yes	0.420534	1.83239	0.00235	0.0117337	yes	TRUE
ENSG00000179023	2.58655	6.92834	5e-05	0.000394466	yes	2.02173	5.23336	5e-05	0.000394466	yes	FALSE
ENSG00000179051	-0.30826	-2.56402	5e-05	0.000394466	yes	-0.83107	-6.82669	5e-05	0.000394466	yes	TRUE
ENSG00000179082	0.333515	2.33566	5e-05	0.000394466	yes	-0.51804	-3.12305	5e-05	0.000394466	yes	FALSE
ENSG00000179091	-0.390942	-3.25232	5e-05	0.000394466	yes	-0.282369	-2.3513	0.0001	0.000748217	yes	TRUE
ENSG00000179104	-0.566364	-4.04633	5e-05	0.000394466	yes	1.10294	8.22186	5e-05	0.000394466	yes	TRUE
ENSG00000179163	0.288947	2.81488	5e-05	0.000394466	yes	-0.288695	-2.7245	5e-05	0.000394466	yes	FALSE
ENSG00000179218	0.421329	3.49929	5e-05	0.000394466	yes	0.196528	1.63789	0.0035	0.016423	yes	FALSE
ENSG00000179241	-0.294809	-1.82098	0.0015	0.00802265	yes	-0.265563	-1.69656	0.0035	0.016423	yes	TRUE
ENSG00000179344	0.381678	2.46686	5e-05	0.000394466	yes	0.584042	3.76739	5e-05	0.000394466	yes	FALSE
ENSG00000179348	0.448914	2.97172	5e-05	0.000394466	yes	0.570129	3.79846	5e-05	0.000394466	yes	TRUE
ENSG00000179403	0.472901	2.83306	5e-05	0.000394466	yes	0.635611	3.85459	5e-05	0.000394466	yes	FALSE
ENSG00000179455	0.376358	2.35485	5e-05	0.000394466	yes	0.340448	2.24084	5e-05	0.000394466	yes	TRUE
ENSG00000179750	-0.564953	-4.66566	5e-05	0.000394466	yes	-0.482433	-4.03583	5e-05	0.000394466	yes	FALSE
ENSG00000179832	0.696343	5.9204	5e-05	0.000394466	yes	0.581029	4.90325	5e-05	0.000394466	yes	TRUE
ENSG00000179862	-0.303795	-1.68846	0.00385	0.0177672	yes	-0.310826	-1.72379	0.00275	0.0133764	yes	FALSE
ENSG00000179915	-1.33282	-2.01753	5e-05	0.000394466	yes	-1.45511	-1.76786	0.00035	0.00228343	yes	FALSE
ENSG00000179981	-0.216073	-1.54248	0.00975	0.0383593	yes	-0.241117	-2.02344	0.00025	0.00169574	yes	TRUE
ENSG00000180066	0.823147	1.56312	0.00575	0.0248112	yes	0.842698	1.54538	0.00525	0.0229379	yes	FALSE
ENSG00000180573	-0.430182	-3.14756	5e-05	0.000394466	yes	-0.545897	-4.14449	5e-05	0.000394466	yes	FALSE
ENSG00000180574	0.267672	1.58551	0.00595	0.0255172	yes	0.413228	2.50054	5e-05	0.000394466	yes	FALSE
ENSG00000180596	-0.52059	-4.40457	5e-05	0.000394466	yes	-0.461119	-3.91112	5e-05	0.000394466	yes	FALSE
ENSG00000180730	0.566363	1.75949	0.00385	0.0177672	yes	-0.6583	-1.65072	0.0062	0.0263992	yes	FALSE
ENSG00000180806	0.983271	3.65544	5e-05	0.000394466	yes	0.599469	2.27663	0.0002	0.00139451	yes	FALSE
ENSG00000180834	-1.87967	-1.6051	0.00425	0.0192412	yes	-1.4565	-1.32614	0.0067	0.0282137	yes	TRUE
ENSG00000180891	0.298203	1.50034	0.01045	0.0405686	yes	-0.42877	-1.81931	0.00145	0.00779664	yes	TRUE
ENSG00000180902	0.221242	1.41893	0.0106	0.0410531	yes	0.430544	2.37013	0.0001	0.000748217	yes	TRUE
ENSG00000181004	0.92083	6.35649	5e-05	0.000394466	yes	1.07843	7.1565	5e-05	0.000394466	yes	FALSE
ENSG00000181061	0.20207	1.70551	0.0022	0.0110897	yes	0.485842	4.08213	5e-05	0.000394466	yes	FALSE
ENSG00000181433	-0.487294	-1.62246	0.00215	0.0108713	yes	-1.17148	-3.30746	5e-05	0.000394466	yes	FALSE
ENSG00000181481	-0.218488	-1.87268	0.0011	0.00616363	yes	-0.484084	-4.08946	5e-05	0.000394466	yes	FALSE
ENSG00000181588	-0.661419	-5.94805	5e-05	0.000394466	yes	0.189555	1.79092	0.0019	0.00979865	yes	TRUE
ENSG00000181634	0.478368	3.8445	5e-05	0.000394466	yes	0.190039	1.52083	0.00885	0.0354173	yes	FALSE
ENSG00000181649	0.95918	7.79755	5e-05	0.000394466	yes	0.526978	4.15791	5e-05	0.000394466	yes	FALSE
ENSG00000181744	-0.685618	-4.23904	5e-05	0.000394466	yes	-0.394663	-2.37996	0.0001	0.000748217	yes	FALSE
ENSG00000181751	0.323394	2.37213	5e-05	0.000394466	yes	-0.287057	-2.0961	0.00035	0.00228343	yes	TRUE
ENSG00000181798	-0.43096	-1.77959	0.0026	0.0127622	yes	-0.466812	-1.90764	0.00155	0.00824944	yes	FALSE
ENSG00000181826	0.247402	2.09974	0.00025	0.00169574	yes	0.262169	2.22843	5e-05	0.000394466	yes	FALSE
ENSG00000181873	0.405852	1.93671	0.0007	0.00417041	yes	0.548716	2.84541	5e-05	0.000394466	yes	TRUE
ENSG00000181894	-0.269554	-2.03371	0.00085	0.00494128	yes	-0.424546	-3.08724	5e-05	0.000394466	yes	TRUE
ENSG00000181915	-0.387517	-3.16318	5e-05	0.000394466	yes	-0.489094	-3.98393	5e-05	0.000394466	yes	FALSE
ENSG00000181938	-0.85334	-6.2806	5e-05	0.000394466	yes	-0.189565	-1.5821	0.00495	0.0218443	yes	FALSE
ENSG00000182141	-0.402708	-2.43785	5e-05	0.000394466	yes	-0.225958	-1.5533	0.00695	0.0290653	yes	FALSE
ENSG00000182165	-0.347585	-2.39131	5e-05	0.000394466	yes	-0.671934	-4.50258	5e-05	0.000394466	yes	FALSE
ENSG00000182179	0.708938	1.91347	0.0001	0.000748217	yes	0.567069	1.25793	0.00985	0.0386484	yes	FALSE
ENSG00000182195	-0.551117	-3.65824	5e-05	0.000394466	yes	-0.865832	-5.65926	5e-05	0.000394466	yes	FALSE
ENSG00000182199	-0.319397	-2.40401	5e-05	0.000394466	yes	-0.481314	-3.62667	5e-05	0.000394466	yes	FALSE
ENSG00000182220	0.263534	2.11346	0.0002	0.00139451	yes	-0.226544	-1.82012	0.0009	0.00518136	yes	FALSE
ENSG00000182247	-0.405709	-3.5573	5e-05	0.000394466	yes	-0.496518	-3.8552	5e-05	0.000394466	yes	TRUE
ENSG00000182307	0.447008	3.0576	5e-05	0.000394466	yes	0.430362	2.93464	5e-05	0.000394466	yes	TRUE
ENSG00000182308	0.460624	1.55298	0.0092	0.0365879	yes	1.21209	4.51296	5e-05	0.000394466	yes	FALSE
ENSG00000182319	-0.351915	-2.29493	5e-05	0.000394466	yes	-0.482884	-3.13519	5e-05	0.000394466	yes	FALSE
ENSG00000182362	0.465544	3.38575	5e-05	0.000394466	yes	0.419681	3.06246	5e-05	0.000394466	yes	FALSE
ENSG00000182481	-0.517713	-3.91587	5e-05	0.000394466	yes	0.231222	1.80101	0.00195	0.0100062	yes	FALSE
ENSG00000182544	0.247578	1.81278	0.00195	0.0100062	yes	0.329464	2.26394	0.0001	0.000748217	yes	FALSE
ENSG00000182572	-0.863448	-7.38164	5e-05	0.000394466	yes	-0.506229	-4.48199	5e-05	0.000394466	yes	FALSE
ENSG00000182583	-0.232365	-1.70989	0.00265	0.0129582	yes	-0.460995	-3.21933	5e-05	0.000394466	yes	FALSE
ENSG00000182611	-0.565239	-5.03213	5e-05	0.000394466	yes	-0.197289	-1.59514	0.00595	0.0255172	yes	FALSE
ENSG00000182700	-0.992711	-7.80744	5e-05	0.000394466	yes	-1.69074	-12.9293	5e-05	0.000394466	yes	FALSE
ENSG00000182704	-0.362956	-2.95962	5e-05	0.000394466	yes	-0.204195	-1.65655	0.0039	0.0179486	yes	TRUE
ENSG00000182795	-0.284907	-2.24527	0.0001	0.000748217	yes	-0.607935	-4.73031	5e-05	0.000394466	yes	TRUE
ENSG00000182809	0.269806	1.75746	0.00235	0.0117337	yes	0.965957	6.37412	5e-05	0.000394466	yes	TRUE
ENSG00000182952	-0.180218	-1.45285	0.0103	0.0400621	yes	-0.704476	-6.1983	5e-05	0.000394466	yes	FALSE
ENSG00000182979	-0.371537	-2.24937	5e-05	0.000394466	yes	-0.391167	-2.32101	5e-05	0.000394466	yes	TRUE
ENSG00000182985	-0.976754	-1.74356	0.0034	0.0160162	yes	-1.18292	-2.03467	0.0003	0.00199267	yes	FALSE
ENSG00000183010	-0.246282	-1.86454	0.0012	0.00663203	yes	-0.379468	-2.83251	5e-05	0.000394466	yes	FALSE
ENSG00000183018	2.18743	0.781116	0.01205	0.0456131	yes	2.27044	0.792216	0.01285	0.0480534	yes	FALSE
ENSG00000183020	-0.588701	-2.97578	5e-05	0.000394466	yes	-0.92216	-4.31241	5e-05	0.000394466	yes	TRUE
ENSG00000183049	-0.517737	-1.78165	0.0017	0.00891245	yes	-1.19621	-4.52004	5e-05	0.000394466	yes	TRUE
ENSG00000183098	-0.210774	-1.60662	0.0049	0.0216772	yes	-0.477352	-3.46977	5e-05	0.000394466	yes	TRUE
ENSG00000183161	-0.312813	-2.49877	5e-05	0.000394466	yes	-0.326049	-2.5973	5e-05	0.000394466	yes	TRUE
ENSG00000183291	-0.744778	-6.0381	5e-05	0.000394466	yes	-1.07593	-8.68766	5e-05	0.000394466	yes	TRUE
ENSG00000183337	0.335828	2.23875	0.00025	0.00169574	yes	0.222673	1.4953	0.0078	0.0318998	yes	TRUE
ENSG00000183444	-0.405967	-2.9172	5e-05	0.000394466	yes	-0.706395	-4.81086	5e-05	0.000394466	yes	FALSE
ENSG00000183458	-0.390217	-1.87829	0.001	0.00567333	yes	-0.525942	-2.4779	0.0001	0.000748217	yes	FALSE
ENSG00000183474	0.417057	1.92509	0.00105	0.00591759	yes	0.409863	1.97331	0.0008	0.00468454	yes	FALSE
ENSG00000183496	-0.637261	-5.29674	5e-05	0.000394466	yes	-0.441453	-3.75628	5e-05	0.000394466	yes	FALSE
ENSG00000183576	0.183929	1.44856	0.0112	0.043007	yes	0.371144	2.8971	5e-05	0.000394466	yes	TRUE
ENSG00000183598	-0.911946	-7.80414	5e-05	0.000394466	yes	-0.198532	-1.7532	0.00315	0.0150018	yes	FALSE
ENSG00000183617	0.182659	1.75707	0.00235	0.0117337	yes	-0.186489	-1.75589	0.0027	0.0131678	yes	FALSE
ENSG00000183688	-0.368512	-3.56963	5e-05	0.000394466	yes	-0.433133	-4.17935	5e-05	0.000394466	yes	FALSE
ENSG00000183690	0.748576	1.52456	0.01245	0.0468391	yes	0.953716	2.04288	0.0017	0.00891245	yes	FALSE
ENSG00000183726	0.582433	2.74227	5e-05	0.000394466	yes	0.336806	1.53464	0.0077	0.0315631	yes	FALSE
ENSG00000183765	-0.64082	-3.69508	5e-05	0.000394466	yes	0.265386	1.49123	0.0097	0.0381979	yes	TRUE
ENSG00000183779	0.517904	3.87307	5e-05	0.000394466	yes	0.266809	1.95046	0.001	0.00567333	yes	FALSE
ENSG00000183831	1.6443	1.72368	0.0074	0.0305641	yes	1.63444	1.70634	0.0076	0.0312318	yes	FALSE
ENSG00000183856	-0.458616	-2.83336	5e-05	0.000394466	yes	-0.707955	-4.13405	5e-05	0.000394466	yes	FALSE
ENSG00000183891	0.338865	2.57153	5e-05	0.000394466	yes	0.196998	1.47543	0.00965	0.0380578	yes	TRUE
ENSG00000183929	-1.14744	-1.92759	0.00125	0.0068727	yes	-1.47571	-2.09568	0.0004	0.00256373	yes	FALSE
ENSG00000183941	-0.913145	-2.26385	0.00025	0.00169574	yes	-0.834455	-1.96389	0.0016	0.00848051	yes	FALSE
ENSG00000183943	-0.622696	-2.39357	0.0001	0.000748217	yes	-0.391311	-1.43856	0.0113	0.0433009	yes	TRUE
ENSG00000184012	0.805836	4.81597	5e-05	0.000394466	yes	0.593636	3.52293	5e-05	0.000394466	yes	TRUE
ENSG00000184014	-0.397889	-1.98441	0.0004	0.00256373	yes	0.568569	3.05766	5e-05	0.000394466	yes	TRUE
ENSG00000184083	-0.429316	-2.18016	0.0003	0.00199267	yes	-0.758777	-3.67938	5e-05	0.000394466	yes	TRUE
ENSG00000184139	1.34154	2.60692	5e-05	0.000394466	yes	1.84399	3.73546	5e-05	0.000394466	yes	FALSE
ENSG00000184160	0.899875	6.98703	5e-05	0.000394466	yes	1.10488	8.72639	5e-05	0.000394466	yes	FALSE
ENSG00000184203	0.426958	2.65395	5e-05	0.000394466	yes	0.235279	1.49746	0.0097	0.0381979	yes	FALSE
ENSG00000184254	0.479915	3.10071	5e-05	0.000394466	yes	-0.851685	-5.54547	5e-05	0.000394466	yes	FALSE
ENSG00000184260	-0.582453	-4.93832	5e-05	0.000394466	yes	-0.562685	-4.77162	5e-05	0.000394466	yes	FALSE
ENSG00000184270	-1.11197	-7.97883	5e-05	0.000394466	yes	-1.1278	-8.25393	5e-05	0.000394466	yes	FALSE
ENSG00000184304	0.259851	1.60247	0.00535	0.0233178	yes	0.373238	2.29898	5e-05	0.000394466	yes	TRUE
ENSG00000184348	-0.522308	-4.53544	5e-05	0.000394466	yes	-0.19394	-1.73284	0.0026	0.0127622	yes	FALSE
ENSG00000184357	-0.924455	-7.70102	5e-05	0.000394466	yes	-0.471454	-3.95091	5e-05	0.000394466	yes	FALSE
ENSG00000184408	-0.703155	-2.55064	5e-05	0.000394466	yes	0.731777	3.34278	5e-05	0.000394466	yes	FALSE
ENSG00000184486	-0.560955	-2.1857	0.0003	0.00199267	yes	-0.719005	-2.69441	5e-05	0.000394466	yes	FALSE
ENSG00000184500	0.820154	4.53841	5e-05	0.000394466	yes	0.698133	3.97563	5e-05	0.000394466	yes	TRUE
ENSG00000184564	0.868215	7.17512	5e-05	0.000394466	yes	-0.251422	-2.04236	0.00035	0.00228343	yes	FALSE
ENSG00000184675	-0.640509	-3.767	5e-05	0.000394466	yes	0.219926	1.66213	0.00375	0.0173767	yes	FALSE
ENSG00000184709	-0.505893	-4.16872	5e-05	0.000394466	yes	-1.16838	-7.92364	5e-05	0.000394466	yes	TRUE
ENSG00000184825	-0.813059	-6.76917	5e-05	0.000394466	yes	-0.308488	-2.58471	5e-05	0.000394466	yes	FALSE
ENSG00000184840	-0.431697	-3.41014	5e-05	0.000394466	yes	0.485451	3.83791	5e-05	0.000394466	yes	FALSE
ENSG00000184863	1.10039	6.34352	5e-05	0.000394466	yes	1.39419	8.21555	5e-05	0.000394466	yes	TRUE
ENSG00000184897	-0.249086	-2.06457	0.00055	0.00339017	yes	-0.447972	-3.71049	5e-05	0.000394466	yes	FALSE
ENSG00000184939	-0.448672	-2.01871	0.0006	0.00365163	yes	-0.355547	-1.50957	0.0042	0.0190507	yes	TRUE
ENSG00000184979	-0.398417	-3.3651	5e-05	0.000394466	yes	-0.553277	-4.60174	5e-05	0.000394466	yes	TRUE
ENSG00000184992	-0.45464	-3.82897	5e-05	0.000394466	yes	-0.198634	-1.67677	0.0038	0.0175716	yes	TRUE
ENSG00000185015	1.46361	6.00389	5e-05	0.000394466	yes	-0.828809	-2.31624	0.00015	0.00108114	yes	FALSE
ENSG00000185100	0.369536	2.26299	0.00025	0.00169574	yes	-0.348844	-1.97936	0.0005	0.00312122	yes	FALSE
ENSG00000185127	0.535266	3.4594	5e-05	0.000394466	yes	0.230649	1.483	0.0086	0.0346421	yes	FALSE
ENSG00000185130	-0.700853	-5.78293	5e-05	0.000394466	yes	-0.445065	-3.68802	5e-05	0.000394466	yes	FALSE
ENSG00000185164	0.394122	3.09831	5e-05	0.000394466	yes	0.265268	2.14173	0.00025	0.00169574	yes	FALSE
ENSG00000185303	-0.361184	-2.70568	5e-05	0.000394466	yes	-0.260042	-1.87819	0.001	0.00567333	yes	FALSE
ENSG00000185340	0.243544	2.07488	0.00035	0.00228343	yes	0.213037	1.84094	0.00135	0.00733226	yes	FALSE
ENSG00000185344	-0.443377	-2.39194	5e-05	0.000394466	yes	-0.289842	-1.7609	0.0025	0.0123557	yes	TRUE
ENSG00000185345	1.3926	2.44014	5e-05	0.000394466	yes	-1.18509	-1.35088	0.0049	0.0216772	yes	FALSE
ENSG00000185386	0.511527	3.86063	5e-05	0.000394466	yes	0.521495	3.87106	5e-05	0.000394466	yes	FALSE
ENSG00000185515	0.212903	1.40053	0.01315	0.0489374	yes	0.263769	1.73479	0.00205	0.010441	yes	TRUE
ENSG00000185551	-0.750195	-2.97216	5e-05	0.000394466	yes	-0.88821	-3.51842	5e-05	0.000394466	yes	FALSE
ENSG00000185624	0.286562	2.2013	5e-05	0.000394466	yes	0.395367	3.02092	5e-05	0.000394466	yes	TRUE
ENSG00000185627	0.385727	2.77076	5e-05	0.000394466	yes	0.227863	1.63628	0.0041	0.0186935	yes	FALSE
ENSG00000185716	0.804937	4.61334	5e-05	0.000394466	yes	0.323577	1.92249	0.0011	0.00616363	yes	TRUE
ENSG00000185818	-0.63128	-5.6267	5e-05	0.000394466	yes	-0.237701	-2.1516	0.0004	0.00256373	yes	TRUE
ENSG00000185825	0.397874	3.25121	5e-05	0.000394466	yes	0.258919	2.13511	0.00025	0.00169574	yes	TRUE
ENSG00000185842	0.241429	1.45064	0.0124	0.0467017	yes	0.728133	4.30188	5e-05	0.000394466	yes	TRUE
ENSG00000185869	-0.311236	-1.64998	0.0065	0.0275095	yes	-0.378365	-2.04388	0.0013	0.00709758	yes	FALSE
ENSG00000185875	-0.239344	-1.9272	0.00125	0.0068727	yes	-0.974359	-8.46467	5e-05	0.000394466	yes	FALSE
ENSG00000185896	0.32232	2.53327	5e-05	0.000394466	yes	0.347907	2.74696	5e-05	0.000394466	yes	TRUE
ENSG00000185904	-0.443966	-4.13698	5e-05	0.000394466	yes	-0.459655	-4.26871	5e-05	0.000394466	yes	TRUE
ENSG00000185909	0.489638	3.66087	5e-05	0.000394466	yes	0.306212	2.04798	0.00025	0.00169574	yes	FALSE
ENSG00000185963	-0.268223	-2.12249	0.00035	0.00228343	yes	0.263427	2.12359	0.0003	0.00199267	yes	TRUE
ENSG00000185974	-0.401057	-2.09576	0.0002	0.00139451	yes	-1.42852	-6.18446	5e-05	0.000394466	yes	TRUE
ENSG00000185989	-0.26074	-2.49294	5e-05	0.000394466	yes	0.275858	2.59906	5e-05	0.000394466	yes	TRUE
ENSG00000186063	0.943156	3.47405	5e-05	0.000394466	yes	1.47905	5.67573	5e-05	0.000394466	yes	FALSE
ENSG00000186073	0.4616	1.60188	0.0055	0.0238795	yes	0.390898	1.55538	0.0041	0.0186935	yes	TRUE
ENSG00000186132	0.188139	1.49165	0.0097	0.0381979	yes	-0.279475	-2.05011	0.0003	0.00199267	yes	TRUE
ENSG00000186153	-0.483498	-2.40947	5e-05	0.000394466	yes	-0.63543	-2.5643	0.00015	0.00108114	yes	TRUE
ENSG00000186184	0.451124	3.55037	5e-05	0.000394466	yes	0.633174	4.99313	5e-05	0.000394466	yes	FALSE
ENSG00000186193	-0.628979	-5.24417	5e-05	0.000394466	yes	-0.853823	-7.09703	5e-05	0.000394466	yes	FALSE
ENSG00000186204	2.68272	0.671111	5e-05	0.000394466	yes	2.09158	0.510783	0.0001	0.000748217	yes	FALSE
ENSG00000186280	-0.69379	-2.90937	5e-05	0.000394466	yes	-0.954407	-3.60692	5e-05	0.000394466	yes	TRUE
ENSG00000186439	-1.28441	-2.82796	5e-05	0.000394466	yes	2.84323	9.78065	5e-05	0.000394466	yes	FALSE
ENSG00000186446	-0.385317	-1.92891	0.00085	0.00494128	yes	-0.81594	-4.04577	5e-05	0.000394466	yes	FALSE
ENSG00000186458	0.903944	7.04249	5e-05	0.000394466	yes	0.881891	6.86126	5e-05	0.000394466	yes	FALSE
ENSG00000186462	0.509276	4.59907	5e-05	0.000394466	yes	0.35135	3.0838	5e-05	0.000394466	yes	FALSE
ENSG00000186480	-0.404855	-2.88767	5e-05	0.000394466	yes	0.306408	2.22466	0.0003	0.00199267	yes	TRUE
ENSG00000186501	0.237706	1.99315	0.00065	0.00390953	yes	-0.173688	-1.64148	0.00425	0.0192412	yes	FALSE
ENSG00000186522	-0.516387	-3.28688	5e-05	0.000394466	yes	-0.556621	-2.89202	5e-05	0.000394466	yes	FALSE
ENSG00000186523	-0.686211	-1.82593	0.0002	0.00139451	yes	-0.88656	-2.11718	5e-05	0.000394466	yes	FALSE
ENSG00000186594	0.537777	1.18314	0.0087	0.0349407	yes	0.654508	1.50567	0.00105	0.00591759	yes	FALSE
ENSG00000186638	-0.94801	-3.24887	5e-05	0.000394466	yes	-0.968862	-3.09125	5e-05	0.000394466	yes	FALSE
ENSG00000186765	0.618853	2.79827	5e-05	0.000394466	yes	-0.367126	-1.43701	0.0107	0.041397	yes	FALSE
ENSG00000186767	-0.482511	-4.03423	5e-05	0.000394466	yes	-0.436764	-3.6825	5e-05	0.000394466	yes	FALSE
ENSG00000186777	-0.838955	-4.19683	5e-05	0.000394466	yes	-1.00482	-4.81656	5e-05	0.000394466	yes	FALSE
ENSG00000186792	0.717618	2.07443	0.0009	0.00518136	yes	1.17346	3.43738	5e-05	0.000394466	yes	FALSE
ENSG00000186806	-0.464148	-1.54081	0.00805	0.0327698	yes	-0.845691	-2.66065	5e-05	0.000394466	yes	FALSE
ENSG00000186834	0.284593	2.15481	0.00025	0.00169574	yes	0.336118	2.5634	5e-05	0.000394466	yes	FALSE
ENSG00000187024	-0.374319	-1.55395	0.00675	0.0283811	yes	-0.537807	-2.01624	0.0005	0.00312122	yes	FALSE
ENSG00000187045	2.73884	2.04636	5e-05	0.000394466	yes	1.91706	1.36883	0.0002	0.00139451	yes	FALSE
ENSG00000187051	0.185633	1.53326	0.0072	0.0298829	yes	0.186164	1.54085	0.0073	0.0302255	yes	FALSE
ENSG00000187109	-0.224344	-1.69551	0.00295	0.0141872	yes	0.325993	2.44531	5e-05	0.000394466	yes	TRUE
ENSG00000187193	-0.216982	-1.87091	0.0015	0.00802265	yes	-0.377828	-3.19831	5e-05	0.000394466	yes	FALSE
ENSG00000187325	0.178899	1.42208	0.01305	0.0486372	yes	-0.724018	-6.30156	5e-05	0.000394466	yes	TRUE
ENSG00000187372	-0.381243	-1.69969	0.00465	0.0207586	yes	-0.486552	-2.11513	0.00035	0.00228343	yes	FALSE
ENSG00000187456	-0.664239	-3.05911	5e-05	0.000394466	yes	-0.838835	-3.35075	5e-05	0.000394466	yes	FALSE
ENSG00000187676	-0.184661	-1.58596	0.0057	0.0246243	yes	-0.655228	-5.49724	5e-05	0.000394466	yes	TRUE
ENSG00000187801	-0.463735	-3.54946	5e-05	0.000394466	yes	-0.486292	-3.70302	5e-05	0.000394466	yes	FALSE
ENSG00000187837	-0.235441	-2.01329	0.0005	0.00312122	yes	-0.520519	-4.44797	5e-05	0.000394466	yes	FALSE
ENSG00000187840	-0.416668	-3.4062	5e-05	0.000394466	yes	-0.605896	-4.95518	5e-05	0.000394466	yes	TRUE
ENSG00000187951	-0.751534	-2.892	5e-05	0.000394466	yes	-0.375409	-1.4736	0.0103	0.0400621	yes	TRUE
ENSG00000187990	-0.614523	-5.13012	5e-05	0.000394466	yes	-0.468385	-3.918	5e-05	0.000394466	yes	FALSE
ENSG00000188021	-0.350494	-3.36179	5e-05	0.000394466	yes	-0.422743	-4.03863	5e-05	0.000394466	yes	FALSE
ENSG00000188130	0.295708	1.91904	0.00105	0.00591759	yes	0.245748	1.64318	0.0038	0.0175716	yes	TRUE
ENSG00000188186	-0.415242	-2.95811	5e-05	0.000394466	yes	-0.287458	-2.07765	0.0002	0.00139451	yes	FALSE
ENSG00000188257	1.02699	2.20462	5e-05	0.000394466	yes	1.44537	3.22468	5e-05	0.000394466	yes	FALSE
ENSG00000188290	-0.19791	-1.83492	0.0015	0.00802265	yes	-0.49835	-4.54021	5e-05	0.000394466	yes	FALSE
ENSG00000188419	-0.344685	-1.63687	0.0047	0.0209396	yes	-0.925335	-4.89549	5e-05	0.000394466	yes	TRUE
ENSG00000188483	-0.329514	-2.25962	5e-05	0.000394466	yes	0.330115	2.33722	5e-05	0.000394466	yes	FALSE
ENSG00000188486	-0.758206	-6.30816	5e-05	0.000394466	yes	-0.201401	-1.6906	0.0033	0.0156062	yes	FALSE
ENSG00000188641	-0.550506	-2.23008	0.0003	0.00199267	yes	0.380457	1.73355	0.0025	0.0123557	yes	TRUE
ENSG00000188707	-0.394509	-1.5908	0.00835	0.0337923	yes	-0.481918	-2.1695	0.0004	0.00256373	yes	FALSE
ENSG00000188763	0.29899	1.51506	0.0097	0.0381979	yes	-0.341071	-1.54672	0.008	0.0325998	yes	TRUE
ENSG00000188779	2.5448	3.1975	5e-05	0.000394466	yes	3.19631	4.02891	5e-05	0.000394466	yes	TRUE
ENSG00000188785	1.76384	5.1481	5e-05	0.000394466	yes	1.55091	4.43164	5e-05	0.000394466	yes	FALSE
ENSG00000188833	1.9429	2.48889	5e-05	0.000394466	yes	1.31837	1.51886	0.00225	0.0113068	yes	FALSE
ENSG00000188848	-0.307107	-2.52038	5e-05	0.000394466	yes	-0.77314	-6.28852	5e-05	0.000394466	yes	TRUE
ENSG00000188878	-0.615399	-1.5603	0.00585	0.0251702	yes	-0.771704	-1.88153	0.0018	0.00935173	yes	TRUE
ENSG00000188959	-0.399813	-2.74557	5e-05	0.000394466	yes	-0.761759	-4.81706	5e-05	0.000394466	yes	FALSE
ENSG00000188994	0.403587	1.72527	0.00175	0.0091262	yes	0.514367	2.16128	0.0001	0.000748217	yes	TRUE
ENSG00000189060	-0.343665	-2.9299	5e-05	0.000394466	yes	-0.237004	-2.02162	0.0001	0.000748217	yes	FALSE
ENSG00000189120	-0.220268	-1.6606	0.00365	0.0170029	yes	0.719841	5.89271	5e-05	0.000394466	yes	FALSE
ENSG00000189143	0.497769	4.15156	5e-05	0.000394466	yes	0.468129	3.90576	5e-05	0.000394466	yes	FALSE
ENSG00000189180	-0.236936	-1.60745	0.0047	0.0209396	yes	-0.432202	-2.89458	5e-05	0.000394466	yes	TRUE
ENSG00000189190	-0.463067	-1.81575	0.00085	0.00494128	yes	-0.547827	-2.27254	0.0001	0.000748217	yes	FALSE
ENSG00000189283	-0.961936	-1.63045	0.0029	0.0139832	yes	-1.38356	-1.92091	0.0007	0.00417041	yes	TRUE
ENSG00000196081	-0.745183	-5.08373	5e-05	0.000394466	yes	-0.292942	-2.17735	0.0001	0.000748217	yes	FALSE
ENSG00000196091	0.900389	1.09671	0.00885	0.0354173	yes	1.11712	1.4129	0.00145	0.00779664	yes	FALSE
ENSG00000196136	-0.965851	-2.0766	5e-05	0.000394466	yes	-2.84637	-2.56485	5e-05	0.000394466	yes	FALSE
ENSG00000196139	1.00123	1.39641	0.0007	0.00417041	yes	1.04094	1.48363	0.0005	0.00312122	yes	FALSE
ENSG00000196167	0.606986	4.97511	5e-05	0.000394466	yes	0.651648	5.22938	5e-05	0.000394466	yes	FALSE
ENSG00000196176	-0.92178	-8.66261	5e-05	0.000394466	yes	-0.993007	-9.28349	5e-05	0.000394466	yes	FALSE
ENSG00000196208	-0.328001	-1.67793	0.00305	0.0145908	yes	-0.832691	-4.42421	5e-05	0.000394466	yes	TRUE
ENSG00000196235	0.350874	1.72516	0.0018	0.00935173	yes	0.444254	2.19693	0.0001	0.000748217	yes	TRUE
ENSG00000196284	-0.584086	-1.98403	0.0001	0.000748217	yes	-0.737139	-2.1652	0.00025	0.00169574	yes	TRUE
ENSG00000196296	-2.02861	-1.24295	0.0004	0.00256373	yes	-1.98021	-1.24568	0.00085	0.00494128	yes	FALSE
ENSG00000196331	-0.920382	-7.632	5e-05	0.000394466	yes	-0.648465	-5.40115	5e-05	0.000394466	yes	FALSE
ENSG00000196350	-0.847299	-4.49577	5e-05	0.000394466	yes	-0.591496	-3.22873	5e-05	0.000394466	yes	FALSE
ENSG00000196352	-1.19751	-3.89661	5e-05	0.000394466	yes	-2.47276	-5.07208	5e-05	0.000394466	yes	TRUE
ENSG00000196363	-0.30435	-1.9853	0.00055	0.00339017	yes	0.230554	1.54426	0.009	0.0359267	yes	TRUE
ENSG00000196365	-0.365791	-1.36129	0.01045	0.0405686	yes	-0.382685	-1.37651	0.0085	0.0343066	yes	TRUE
ENSG00000196368	-0.22634	-1.7727	0.0021	0.0106535	yes	-0.222473	-1.74318	0.003	0.0143914	yes	FALSE
ENSG00000196374	-1.00333	-8.77925	5e-05	0.000394466	yes	-0.25033	-2.33389	5e-05	0.000394466	yes	FALSE
ENSG00000196396	-0.472748	-3.78743	5e-05	0.000394466	yes	0.209845	1.46138	0.01105	0.0425401	yes	TRUE
ENSG00000196418	0.549242	4.2852	5e-05	0.000394466	yes	1.37729	10.796	5e-05	0.000394466	yes	TRUE
ENSG00000196449	-0.844354	-4.61242	5e-05	0.000394466	yes	0.448979	2.8731	5e-05	0.000394466	yes	TRUE
ENSG00000196517	-0.571204	-2.30621	0.0002	0.00139451	yes	-1.48283	-4.72989	5e-05	0.000394466	yes	TRUE
ENSG00000196526	-0.308693	-2.04201	0.00045	0.00285055	yes	-0.271612	-1.56382	0.00785	0.0320641	yes	TRUE
ENSG00000196549	1.40844	7.51132	5e-05	0.000394466	yes	0.61865	3.28622	5e-05	0.000394466	yes	TRUE
ENSG00000196597	0.216482	1.56195	0.005	0.0220281	yes	1.51886	10.8097	5e-05	0.000394466	yes	TRUE
ENSG00000196604	0.425625	1.76068	0.0025	0.0123557	yes	0.95806	4.13203	5e-05	0.000394466	yes	FALSE
ENSG00000196620	-0.498123	-4.44716	5e-05	0.000394466	yes	0.997347	8.21808	5e-05	0.000394466	yes	FALSE
ENSG00000196642	0.364338	2.17188	0.0001	0.000748217	yes	0.467596	2.86421	5e-05	0.000394466	yes	TRUE
ENSG00000196646	-0.289214	-1.97204	0.00085	0.00494128	yes	-0.341043	-2.25117	5e-05	0.000394466	yes	TRUE
ENSG00000196653	-0.314461	-2.50022	5e-05	0.000394466	yes	-0.541898	-4.46859	5e-05	0.000394466	yes	FALSE
ENSG00000196693	-0.398785	-3.30548	5e-05	0.000394466	yes	-0.404761	-3.34728	5e-05	0.000394466	yes	TRUE
ENSG00000196741	-0.38835	-2.4926	5e-05	0.000394466	yes	-0.493473	-3.0992	5e-05	0.000394466	yes	FALSE
ENSG00000196747	-0.828383	-6.94841	5e-05	0.000394466	yes	-0.741085	-6.22309	5e-05	0.000394466	yes	FALSE
ENSG00000196781	-0.31219	-1.58548	0.0058	0.0249997	yes	-1.03614	-4.73534	5e-05	0.000394466	yes	TRUE
ENSG00000196787	-0.660819	-5.59031	5e-05	0.000394466	yes	-0.519336	-4.39739	5e-05	0.000394466	yes	FALSE
ENSG00000196844	-1.08799	-2.9594	5e-05	0.000394466	yes	-1.07442	-2.36444	0.0002	0.00139451	yes	FALSE
ENSG00000196866	-0.723273	-3.3737	5e-05	0.000394466	yes	-0.566316	-2.69867	5e-05	0.000394466	yes	FALSE
ENSG00000196873	0.706359	3.9857	5e-05	0.000394466	yes	0.407321	2.19943	5e-05	0.000394466	yes	FALSE
ENSG00000196890	-0.815684	-6.99217	5e-05	0.000394466	yes	-0.426101	-3.79128	5e-05	0.000394466	yes	FALSE
ENSG00000196943	0.320644	2.4863	5e-05	0.000394466	yes	0.260507	2.05996	0.00015	0.00108114	yes	FALSE
ENSG00000196954	-0.298132	-2.37051	5e-05	0.000394466	yes	-0.550184	-4.21767	5e-05	0.000394466	yes	FALSE
ENSG00000197008	-0.452558	-3.68723	5e-05	0.000394466	yes	-0.286711	-2.36477	5e-05	0.000394466	yes	TRUE
ENSG00000197019	0.446271	3.21911	5e-05	0.000394466	yes	0.229016	1.60193	0.00625	0.0265855	yes	FALSE
ENSG00000197021	0.383575	3.26329	5e-05	0.000394466	yes	0.442423	3.77009	5e-05	0.000394466	yes	FALSE
ENSG00000197024	-0.206874	-1.78067	0.00185	0.00957288	yes	0.234767	1.86184	0.0014	0.00756525	yes	FALSE
ENSG00000197043	0.2666	1.94172	0.0006	0.00365163	yes	0.365324	2.61558	5e-05	0.000394466	yes	FALSE
ENSG00000197061	-0.700585	-5.90964	5e-05	0.000394466	yes	-0.399677	-3.38108	5e-05	0.000394466	yes	FALSE
ENSG00000197083	-0.62296	-4.56975	5e-05	0.000394466	yes	-0.874895	-6.58215	5e-05	0.000394466	yes	FALSE
ENSG00000197124	-0.504093	-2.92416	5e-05	0.000394466	yes	-0.340854	-1.58315	0.0084	0.0339599	yes	TRUE
ENSG00000197134	-0.987661	-2.79283	5e-05	0.000394466	yes	-0.634195	-1.76462	0.0013	0.00709758	yes	FALSE
ENSG00000197140	2.98886	4.16756	5e-05	0.000394466	yes	2.96852	4.24422	5e-05	0.000394466	yes	TRUE
ENSG00000197142	0.606666	1.36072	0.00485	0.0214903	yes	1.09034	2.43119	5e-05	0.000394466	yes	FALSE
ENSG00000197150	-0.260266	-1.73764	0.00215	0.0108713	yes	-0.400815	-2.56843	5e-05	0.000394466	yes	FALSE
ENSG00000197170	0.251471	1.68133	0.0026	0.0127622	yes	0.399108	2.69689	5e-05	0.000394466	yes	TRUE
ENSG00000197238	-0.756819	-5.21984	5e-05	0.000394466	yes	-0.597863	-4.27361	5e-05	0.000394466	yes	FALSE
ENSG00000197245	1.04099	2.57538	0.0002	0.00139451	yes	0.937382	2.28184	0.00065	0.00390953	yes	FALSE
ENSG00000197279	-0.31815	-2.33123	5e-05	0.000394466	yes	0.631688	5.07697	5e-05	0.000394466	yes	FALSE
ENSG00000197299	-0.643816	-3.93844	5e-05	0.000394466	yes	-0.296379	-2.04159	0.0003	0.00199267	yes	TRUE
ENSG00000197302	-0.681676	-3.45859	5e-05	0.000394466	yes	-1.31018	-6.43037	5e-05	0.000394466	yes	TRUE
ENSG00000197321	-1.05456	-1.8835	0.0004	0.00256373	yes	-1.49096	-2.25784	5e-05	0.000394466	yes	TRUE
ENSG00000197324	0.61463	3.92027	5e-05	0.000394466	yes	-0.278958	-1.67976	0.00355	0.0166083	yes	FALSE
ENSG00000197332	-0.894086	-2.28782	5e-05	0.000394466	yes	-0.797709	-1.53481	0.0093	0.0369299	yes	FALSE
ENSG00000197362	-0.271409	-2.36666	0.0001	0.000748217	yes	-0.426007	-3.68065	5e-05	0.000394466	yes	TRUE
ENSG00000197372	-0.31874	-2.43185	5e-05	0.000394466	yes	-0.399536	-2.97837	5e-05	0.000394466	yes	TRUE
ENSG00000197406	0.868154	6.80696	5e-05	0.000394466	yes	-0.754105	-5.20253	5e-05	0.000394466	yes	FALSE
ENSG00000197409	-0.750365	-4.37857	5e-05	0.000394466	yes	-0.504714	-2.91707	5e-05	0.000394466	yes	FALSE
ENSG00000197415	2.20499	0.610033	5e-05	0.000394466	yes	3.16846	0.893743	5e-05	0.000394466	yes	FALSE
ENSG00000197417	0.280035	2.07399	0.0004	0.00256373	yes	0.338754	2.50394	5e-05	0.000394466	yes	FALSE
ENSG00000197442	0.619875	4.85937	5e-05	0.000394466	yes	0.597578	4.67386	5e-05	0.000394466	yes	TRUE
ENSG00000197444	-0.45248	-2.84685	5e-05	0.000394466	yes	-0.408469	-2.59525	5e-05	0.000394466	yes	FALSE
ENSG00000197562	0.178905	1.57768	0.0064	0.0271381	yes	0.234407	2.02348	0.0003	0.00199267	yes	TRUE
ENSG00000197587	-0.676774	-2.38765	5e-05	0.000394466	yes	-0.612198	-2.17021	0.0002	0.00139451	yes	FALSE
ENSG00000197635	1.55909	1.00969	0.0006	0.00365163	yes	1.89277	1.23852	5e-05	0.000394466	yes	FALSE
ENSG00000197746	0.415941	2.84357	5e-05	0.000394466	yes	0.334236	2.3138	5e-05	0.000394466	yes	TRUE
ENSG00000197763	-0.890256	-7.13986	5e-05	0.000394466	yes	-0.265057	-2.16899	0.0001	0.000748217	yes	TRUE
ENSG00000197766	-0.337117	-1.72204	0.0032	0.0151942	yes	-0.992909	-3.61377	5e-05	0.000394466	yes	FALSE
ENSG00000197780	0.304579	2.41915	5e-05	0.000394466	yes	0.455937	3.63464	5e-05	0.000394466	yes	FALSE
ENSG00000197846	-0.377166	-3.14248	5e-05	0.000394466	yes	-0.421075	-3.50641	5e-05	0.000394466	yes	FALSE
ENSG00000197872	0.47607	1.52674	0.0117	0.0445317	yes	-0.691148	-2.00723	0.00025	0.00169574	yes	FALSE
ENSG00000197903	-0.429182	-3.19505	5e-05	0.000394466	yes	-0.337034	-2.49928	5e-05	0.000394466	yes	FALSE
ENSG00000197930	0.762448	4.86982	5e-05	0.000394466	yes	0.526725	3.36321	5e-05	0.000394466	yes	TRUE
ENSG00000197971	-0.312264	-1.49358	0.00545	0.0236884	yes	-0.380245	-1.79943	0.00135	0.00733226	yes	TRUE
ENSG00000197991	-0.463678	-4.00051	5e-05	0.000394466	yes	0.217061	1.97488	0.00045	0.00285055	yes	FALSE
ENSG00000198039	-0.662618	-4.89395	5e-05	0.000394466	yes	-0.260614	-2.01636	0.00055	0.00339017	yes	FALSE
ENSG00000198053	-0.609061	-2.93122	5e-05	0.000394466	yes	-0.675831	-3.1608	5e-05	0.000394466	yes	FALSE
ENSG00000198113	-0.649656	-2.07734	0.00065	0.00390953	yes	-0.938868	-2.8404	5e-05	0.000394466	yes	TRUE
ENSG00000198125	-0.230021	-1.78042	0.00145	0.00779664	yes	-1.43548	-10.6499	5e-05	0.000394466	yes	FALSE
ENSG00000198155	-0.559669	-3.68285	5e-05	0.000394466	yes	-0.266917	-1.75752	0.0022	0.0110897	yes	FALSE
ENSG00000198169	0.294952	2.01144	0.00035	0.00228343	yes	0.386265	2.60631	5e-05	0.000394466	yes	TRUE
ENSG00000198176	1.41611	8.52474	5e-05	0.000394466	yes	2.35102	14.7316	5e-05	0.000394466	yes	TRUE
ENSG00000198185	-0.222028	-1.73028	0.0032	0.0151942	yes	-0.220957	-1.77725	0.00205	0.010441	yes	FALSE
ENSG00000198205	-0.498624	-3.92569	5e-05	0.000394466	yes	-0.738236	-5.7856	5e-05	0.000394466	yes	FALSE
ENSG00000198252	0.398733	3.22595	5e-05	0.000394466	yes	0.599203	4.87052	5e-05	0.000394466	yes	FALSE
ENSG00000198270	0.344958	2.06515	0.0004	0.00256373	yes	-0.318084	-1.87428	0.0012	0.00663203	yes	TRUE
ENSG00000198298	-0.318584	-2.41411	5e-05	0.000394466	yes	-0.323943	-2.38395	5e-05	0.000394466	yes	FALSE
ENSG00000198300	-2.14445	-5.8102	5e-05	0.000394466	yes	-1.74692	-4.85012	5e-05	0.000394466	yes	TRUE
ENSG00000198355	-0.338477	-2.65352	5e-05	0.000394466	yes	0.257451	2.03901	0.0003	0.00199267	yes	FALSE
ENSG00000198356	0.232078	1.91027	0.00085	0.00494128	yes	0.272189	2.24756	5e-05	0.000394466	yes	FALSE
ENSG00000198366	-0.764953	-6.4082	5e-05	0.000394466	yes	-0.616696	-5.25239	5e-05	0.000394466	yes	FALSE
ENSG00000198369	0.337223	1.56708	0.00515	0.0225883	yes	0.465765	2.24207	5e-05	0.000394466	yes	TRUE
ENSG00000198374	-1.23225	-10.0609	5e-05	0.000394466	yes	-0.969221	-7.72135	5e-05	0.000394466	yes	FALSE
ENSG00000198399	0.235213	1.5475	0.0048	0.0213063	yes	0.238397	1.6093	0.0033	0.0156062	yes	TRUE
ENSG00000198435	-0.151718	-1.483	0.00975	0.0383593	yes	-0.21574	-2.10118	0.0001	0.000748217	yes	FALSE
ENSG00000198455	-0.514495	-4.56543	5e-05	0.000394466	yes	-0.653535	-5.72503	5e-05	0.000394466	yes	TRUE
ENSG00000198468	-0.47816	-1.68256	0.0045	0.0201898	yes	-0.515845	-1.69458	0.0044	0.0198021	yes	FALSE
ENSG00000198518	-0.628053	-5.34274	5e-05	0.000394466	yes	-0.51062	-4.3475	5e-05	0.000394466	yes	FALSE
ENSG00000198521	-0.367921	-2.0295	0.0004	0.00256373	yes	-0.412124	-2.22936	5e-05	0.000394466	yes	TRUE
ENSG00000198551	-0.243415	-1.72626	0.00265	0.0129582	yes	-0.41162	-3.08728	5e-05	0.000394466	yes	TRUE
ENSG00000198585	-0.257207	-1.70475	0.00235	0.0117337	yes	0.213196	1.43318	0.0117	0.0445317	yes	FALSE
ENSG00000198586	0.280735	1.48944	0.00535	0.0233178	yes	0.536541	2.84071	5e-05	0.000394466	yes	TRUE
ENSG00000198589	0.923831	4.79663	5e-05	0.000394466	yes	0.733812	3.80886	5e-05	0.000394466	yes	TRUE
ENSG00000198612	0.219868	1.6494	0.0031	0.0147981	yes	0.193369	1.46147	0.0099	0.0388061	yes	FALSE
ENSG00000198648	-0.50214	-3.26875	5e-05	0.000394466	yes	-1.02075	-6.64745	5e-05	0.000394466	yes	TRUE
ENSG00000198729	-0.571661	-3.96646	5e-05	0.000394466	yes	-1.63772	-8.78522	5e-05	0.000394466	yes	FALSE
ENSG00000198736	0.204088	1.68174	0.00365	0.0170029	yes	0.194744	1.6024	0.0062	0.0263992	yes	FALSE
ENSG00000198740	-0.441326	-3.09777	5e-05	0.000394466	yes	-0.329315	-2.19447	0.0004	0.00256373	yes	TRUE
ENSG00000198792	0.334751	2.27903	0.0001	0.000748217	yes	0.442004	2.91493	5e-05	0.000394466	yes	TRUE
ENSG00000198830	-0.410119	-2.85787	5e-05	0.000394466	yes	-0.510305	-3.59603	5e-05	0.000394466	yes	FALSE
ENSG00000198832	0.458078	4.01512	5e-05	0.000394466	yes	0.294243	2.56854	5e-05	0.000394466	yes	FALSE
ENSG00000198833	-0.458707	-4.05305	5e-05	0.000394466	yes	-1.04101	-8.95757	5e-05	0.000394466	yes	TRUE
[truncated: 435 more rows]
