# Supplementary material for: HNRNPM controls circRNA biogenesis and splicing fidelity to sustain cancer cell fitness
Source: eLife. 2021 Jun 2;10:e59654. doi: 10.7554/eLife.59654 (PMC8346284; doi:10.7554/eLife.59654)
Supplement: Figure 4—source data 3. [file elife-59654-fig4-data3.xlsx]

## Sheet: Source Data 5
Source Data 5: Binding Status of Significantly Changed Skipped Exon Events
Ensembl_gene_id	Symbol	Chr	Strand	Exon Start	Exon End	Upstream Exon Start	Upstream Exon End	Downstream Exon Start	Downstream Exon End	B7/SCR p_value	B7/SCR FDR	B7/SCR IncLevelDifference	B9/SCR p_value	B9/SCR FDR	B9/SCR IncLevelDifference	Bound
ENSG00000131791	PRKAB2	chr1	-	146632376	146632412	146630798	146631221	146633291	146633359	0	0	-0.847	0	0	-0.775	TRUE
ENSG00000143393	PI4KB	chr1	-	151298648	151298849	151288049	151288985	151299747	151300133	1.21791e-13	9.76957e-11	-0.264	1.21148e-12	1.33597e-09	-0.261	TRUE
ENSG00000127483	HP1BP3	chr1	-	21106838	21107033	21106305	21106404	21113688	21113765	8.84721e-10	4.40691e-07	-0.236	7.55961e-05	0.0166729	-0.167	TRUE
ENSG00000127483	HP1BP3	chr1	-	21106843	21107033	21106305	21106404	21113688	21113816	1.46417e-08	5.83457e-06	-0.418	1.80674e-05	0.00500417	-0.333	TRUE
ENSG00000125944	HNRNPR	chr1	-	23667345	23667510	23664763	23665101	23670704	23670810	0	0	-0.411	0	0	-0.303	FALSE
ENSG00000125944	HNRNPR	chr1	-	23667345	23667513	23664983	23665101	23670704	23670815	0	0	-0.42	0	0	-0.31	FALSE
ENSG00000116641	DOCK7	chr1	-	63010618	63010710	63009327	63009416	63018403	63018572	0.000458213	0.049839	-0.169	2.48013e-06	0.000928864	-0.215	TRUE
ENSG00000077254	USP33	chr1	-	78211106	78211284	78207302	78207433	78225328	78225537	0	0	-0.335	2.04914e-12	2.179e-09	-0.24	TRUE
ENSG00000077254	USP33	chr1	-	78212084	78212241	78207302	78207433	78225328	78225374	0	0	-0.751	0	0	-0.543	TRUE
ENSG00000077254	USP33	chr1	-	78212084	78212241	78211106	78211284	78225328	78225374	0	0	-0.98	0	0	-0.942	TRUE
ENSG00000171603	CLSTN1	chr1	-	9797556	9797612	9795943	9796100	9801152	9801314	0	0	-0.33	0.000248867	0.0463118	-0.084	TRUE
ENSG00000055070	SZRD1	chr1	+	16717870	16717919	16693583	16693803	16719723	16719880	1.11231e-05	0.0022901	0.181	8.17317e-07	0.000340353	0.207	TRUE
ENSG00000117335	CD46	chr1	+	207941124	207941168	207940358	207940540	207943666	207943707	1.75604e-12	1.29123e-09	0.206	2.4758e-14	3.42863e-11	0.217	TRUE
ENSG00000117859	OSBPL9	chr1	+	52135106	52135486	52117663	52117713	52179675	52179751	1.79731e-08	6.98195e-06	-0.311	4.75879e-10	3.54226e-07	-0.295	TRUE
ENSG00000165813	CCDC186	chr10	-	115932900	115933024	115921367	115923088	115933774	115933961	0	0	-0.31	6.81857e-09	3.98078e-06	-0.204	FALSE
ENSG00000196793	ZNF239	chr10	-	44063347	44063469	44051795	44053619	44069988	44070066	0.000272558	0.0334024	-0.231	2.59552e-06	0.000960004	-0.276	TRUE
ENSG00000176986	SEC24C	chr10	+	75521856	75521924	75520471	75520607	75523248	75523359	0	0	-0.225	8.04024e-13	9.20746e-10	-0.129	TRUE
ENSG00000171307	ZDHHC16	chr10	+	99210114	99210293	99205948	99206110	99211428	99211675	8.10981e-09	3.40755e-06	-0.276	1.42689e-06	0.000574121	-0.225	TRUE
ENSG00000205531	NAP1L4	chr11	-	3010359	3010501	3000437	3000467	3013484	3013607	0	0	-0.243	3.83682e-12	4.0084e-09	-0.177	TRUE
ENSG00000005801	ZNF195	chr11	-	3381950	3382018	3381615	3381795	3392205	3392300	1.06855e-08	4.31372e-06	-0.56	4.70352e-10	3.54226e-07	-0.375	TRUE
ENSG00000005801	ZNF195	chr11	-	3382973	3383119	3381550	3381795	3392205	3392377	0	0	-0.478	0	0	-0.406	TRUE
ENSG00000005801	ZNF195	chr11	-	3383776	3383832	3381227	3381795	3392205	3392300	0	0	-0.682	1.37335e-13	1.70378e-10	-0.488	TRUE
ENSG00000005801	ZNF195	chr11	-	3394807	3394886	3392807	3392933	3400268	3400368	0	0	-0.402	1.64868e-13	1.96355e-10	-0.324	TRUE
ENSG00000005801	ZNF195	chr11	-	3394807	3394905	3392807	3392933	3400268	3400369	0	0	-0.467	2.22045e-16	4.00683e-13	-0.384	TRUE
ENSG00000149089	APIP	chr11	-	34918308	34918402	34916557	34916657	34937775	34937883	2.60484e-09	1.20068e-06	-0.242	1.31869e-05	0.00381197	-0.163	FALSE
ENSG00000149187	CELF1	chr11	-	47521005	47521156	47510389	47510576	47574544	47574669	0	0	-0.309	3.4964e-06	0.00125222	-0.174	TRUE
ENSG00000073921	PICALM	chr11	-	85701293	85701421	85694909	85695016	85707869	85707972	1.91847e-12	1.37786e-09	0.227	1.55775e-10	1.30651e-07	0.208	TRUE
ENSG00000073921	PICALM	chr11	-	85701293	85701442	85694909	85695016	85707869	85707972	1.89659e-12	1.37786e-09	0.202	4.89482e-11	4.22437e-08	0.188	TRUE
ENSG00000149311	ATM	chr11	+	108095511	108095598	108093843	108093913	108098322	108098423	6.32971e-12	4.20388e-09	-0.662	6.14264e-12	5.99653e-09	-0.544	TRUE
ENSG00000149547	EI24	chr11	+	125440000	125440086	125439176	125439469	125442354	125442465	0	0	-0.348	3.9968e-14	5.17404e-11	-0.187	FALSE
ENSG00000084234	APLP2	chr11	+	129993507	129993674	129992200	129992408	129996595	129996725	0	0	-0.244	0	0	-0.225	TRUE
ENSG00000166333	ILK	chr11	+	6626083	6626173	6625456	6625590	6629624	6629719	4.26476e-07	0.000130268	-0.568	7.91038e-08	3.92546e-05	-0.513	TRUE
ENSG00000158636	EMSY	chr11	+	76170977	76171129	76169227	76169402	76174865	76175124	0.000139706	0.0192613	-0.371	0.000150843	0.0305074	-0.397	TRUE
ENSG00000074266	EED	chr11	+	85981125	85981199	85979498	85979603	85988022	85988180	0	0	-0.384	0	0	-0.345	TRUE
ENSG00000196458	ZNF605	chr12	-	133524734	133524856	133521384	133522383	133532829	133532848	0	0	-0.348	1.91059e-08	1.00685e-05	-0.18	FALSE
ENSG00000187109	NAP1L1	chr12	-	76462689	76462774	76453918	76454059	76467983	76468019	0	0	-0.218	3.49928e-11	3.06439e-08	-0.146	TRUE
ENSG00000111596	CNOT2	chr12	+	70695485	70695645	70671912	70672054	70704675	70704797	0	0	-0.263	9.5638e-09	5.42395e-06	-0.13	TRUE
ENSG00000121749	TBC1D15	chr12	+	72255185	72255276	72233539	72233591	72265850	72265948	5.4623e-14	4.55925e-11	-0.202	5.81368e-05	0.0134708	-0.085	TRUE
ENSG00000120685	PROSER1	chr13	-	39586828	39588613	39586220	39586370	39591637	39591681	1.21438e-10	7.01005e-08	0.48	1.81568e-06	0.000697561	0.42	TRUE
ENSG00000244306	LINC01296	chr14	-	19923013	19923123	19921591	19921738	19925240	19925334	0	0	-0.483	0	0	-0.41	FALSE
ENSG00000100697	DICER1	chr14	-	95600698	95600840	95599652	95599840	95606996	95607096	5.92215e-12	4.01964e-09	-0.202	1.92132e-05	0.00527249	-0.119	TRUE
ENSG00000100938	GMPR2	chr14	+	24703313	24703447	24702685	24702804	24704943	24705026	0	0	-0.733	0	0	-0.513	TRUE
ENSG00000100938	GMPR2	chr14	+	24703319	24703447	24702685	24702804	24704943	24705026	0	0	-0.6	0	0	-0.404	TRUE
ENSG00000042317	SPATA7	chr14	+	88881549	88881610	88862500	88862547	88883055	88883188	1.11022e-16	1.1429e-13	-0.64	3.90051e-06	0.00135831	-0.457	TRUE
ENSG00000224078		chr15	+	25300221	25300377	25298975	25299114	25301630	25301712	0	0	-0.764	0	0	-0.741	FALSE
ENSG00000156958	GALK2	chr15	+	49517402	49517546	49509387	49509510	49528048	49528138	0	0	-0.319	9.99201e-16	1.60815e-12	-0.16	TRUE
ENSG00000140525	FANCI	chr15	+	89788426	89788542	89787248	89787298	89790860	89790962	5.3279e-10	2.86159e-07	-0.295	1.23852e-09	8.57591e-07	-0.185	TRUE
ENSG00000140525	FANCI	chr15	+	89788987	89789070	89787248	89787298	89790860	89790962	5.43821e-12	3.73218e-09	-0.298	5.11819e-06	0.00171226	-0.137	TRUE
ENSG00000134419	RPS15A	chr16	-	18797562	18797658	18796060	18796145	18800303	18800440	0	0	-0.436	0	0	-0.431	TRUE
ENSG00000205937	RNPS1	chr16	-	2314574	2314761	2314177	2314332	2318056	2318092	0	0	-0.253	0	0	-0.24	TRUE
ENSG00000132600	PRMT7	chr16	+	68381114	68381197	68380024	68380183	68386151	68386312	2.82405e-09	1.28258e-06	-0.341	1.43631e-09	9.71939e-07	-0.353	TRUE
ENSG00000132600	PRMT7	chr16	+	68382245	68382334	68380048	68380183	68386151	68386312	4.33601e-06	0.00103806	-0.197	5.73019e-08	2.89175e-05	-0.212	TRUE
ENSG00000170160	CCDC144A	chr17	+	16630374	16630453	16623831	16623972	16630841	16631209	0.000396108	0.0444213	-0.243	6.72905e-06	0.00213143	-0.389	FALSE
ENSG00000163597	SNHG16	chr17	+	74555027	74555125	74553874	74553939	74557370	74557480	0	0	-0.205	0	0	-0.232	TRUE
ENSG00000197128	ZNF772	chr19	-	57987028	57987154	57984413	57985789	57988002	57988040	2.71629e-05	0.00490569	-0.264	2.0399e-05	0.00549655	-0.248	TRUE
ENSG00000131845	ZNF304	chr19	+	57864023	57864103	57862694	57863065	57865093	57865219	0	0	-0.809	0	0	-0.714	FALSE
ENSG00000188785	ZNF548	chr19	+	57904169	57904316	57901333	57901482	57905556	57905591	0	0	-0.924	3.64153e-14	4.9284e-11	-0.852	FALSE
ENSG00000115084	SLC35F5	chr2	-	114475330	114475425	114472224	114472772	114476731	114476821	9.99201e-16	9.79629e-13	-0.309	1.74305e-14	2.53163e-11	-0.276	FALSE
ENSG00000074054	CLASP1	chr2	-	122166600	122166623	122165047	122165291	122168442	122168545	0.000235207	0.0295881	-0.309	2.10707e-06	0.000794138	-0.381	TRUE
ENSG00000118965	WDR35	chr2	-	20160315	20160375	20153595	20153739	20166485	20166670	0.000362118	0.0420424	0.187	0.000138565	0.0287506	0.205	FALSE
ENSG00000003393	ALS2	chr2	-	202584709	202584851	202582800	202582933	202587766	202587843	9.27961e-09	3.8211e-06	-0.315	3.01288e-07	0.000139081	-0.239	FALSE
ENSG00000122085	MTERF4	chr2	-	242038811	242039309	242036658	242036842	242041668	242041702	8.41755e-10	4.22698e-07	-0.251	4.85209e-09	2.97873e-06	-0.24	TRUE
ENSG00000071054	MAP4K4	chr2	+	102487956	102488147	102486757	102486877	102490109	102490226	1.39222e-10	7.96221e-08	-0.245	3.51174e-06	0.00125222	-0.179	TRUE
ENSG00000116095	PLEKHA3	chr2	+	179353695	179353741	179350368	179350484	179355386	179355541	9.83052e-10	4.81898e-07	-0.293	1.16572e-05	0.00345361	-0.198	FALSE
ENSG00000128641	MYO1B	chr2	+	192265475	192265561	192265108	192265194	192272841	192272915	1.22004e-06	0.000331969	-0.213	4.8833e-06	0.00166169	-0.204	TRUE
ENSG00000021826	CPS1	chr2	+	211476841	211477017	211473085	211473283	211481147	211481265	0.000161003	0.0219043	0.263	0.000230825	0.043498	0.211	FALSE
ENSG00000132330	SCLY	chr2	+	238982424	238982488	238977938	238978118	238990350	238990477	6.25198e-11	3.71307e-08	-0.547	2.11759e-10	1.65922e-07	-0.386	TRUE
ENSG00000243147	MRPL33	chr2	+	27997291	27997397	27995541	27995559	28002300	28002608	0	0	-0.358	0	0	-0.362	TRUE
ENSG00000173209	AHSA2	chr2	+	61410682	61410797	61408455	61408540	61411847	61411935	0	0	-0.376	0	0	-0.363	TRUE
ENSG00000114956	DGUOK	chr2	+	74184252	74184367	74173846	74174033	74185273	74185372	1.02549e-06	0.000285318	-0.225	6.18835e-06	0.00199195	-0.198	TRUE
ENSG00000101474	APMAP	chr20	-	24945011	24945034	24943561	24944658	24949528	24949720	0	0	-0.248	0	0	-0.182	TRUE
ENSG00000101474	APMAP	chr20	-	24945011	24945034	24943561	24944658	24950162	24950296	0	0	-0.735	0	0	-0.637	TRUE
ENSG00000214078	CPNE1	chr20	-	34246852	34246936	34220717	34220845	34252682	34252822	1.0858e-13	8.8244e-11	-0.407	3.24633e-06	0.00117161	-0.29	TRUE
ENSG00000177410	ZFAS1	chr20	+	47897440	47897501	47897022	47897107	47905582	47905797	0	0	-0.213	1.97908e-12	2.14277e-09	-0.165	FALSE
ENSG00000186866	POFUT2	chr21	-	46685937	46686142	46683843	46685550	46687505	46687628	1.78785e-08	6.98195e-06	-0.275	2.84212e-06	0.00104472	-0.223	TRUE
ENSG00000271308	-	chr21	+	11171979	11172043	11169788	11169841	11183419	11184046	0	0	-0.745	1.89758e-10	1.52701e-07	-0.393	FALSE
ENSG00000271308	-	chr21	+	11173891	11174002	11169788	11169841	11183419	11184046	0	0	-0.763	0	0	-0.573	FALSE
ENSG00000015475	BID	chr22	-	18226569	18226779	18222115	18222254	18257147	18257258	5.11115e-05	0.0085093	0.211	8.9466e-06	0.0027748	0.202	FALSE
ENSG00000100105	PATZ1	chr22	-	31724773	31724845	31721795	31723295	31731678	31731849	0	0	-0.481	2.22045e-16	4.00683e-13	-0.494	TRUE
ENSG00000100105	PATZ1	chr22	-	31724773	31724910	31721790	31723295	31731678	31731849	1.11022e-16	1.1429e-13	-0.488	1.53322e-13	1.8633e-10	-0.519	TRUE
ENSG00000100425	BRD1	chr22	-	50181038	50181170	50171326	50171461	50187682	50187942	8.088e-07	0.000229157	0.257	6.43692e-06	0.00205293	0.213	TRUE
ENSG00000100425	BRD1	chr22	-	50181038	50181535	50171326	50171461	50187682	50187942	6.99625e-07	0.00020193	0.218	2.13464e-05	0.00570026	0.166	TRUE
ENSG00000163785	RYK	chr3	-	133896785	133896917	133894774	133894883	133901846	133901915	0	0	0.286	0	0	0.276	TRUE
ENSG00000131381	RBSN	chr3	-	15139626	15139781	15138042	15138217	15140542	15140640	1.3746e-09	6.63311e-07	-0.274	1.9855e-10	1.57646e-07	-0.265	FALSE
ENSG00000075711	DLG1	chr3	-	196876614	196876667	196869589	196869639	196921296	196921460	2.4758e-14	2.1538e-11	0.28	1.90094e-08	1.00685e-05	0.208	TRUE
ENSG00000172113	NME6	chr3	-	48342017	48342124	48339917	48340013	48342843	48342877	0.000295191	0.0356806	-0.198	4.00897e-05	0.00966518	-0.21	FALSE
ENSG00000157036	EXOG	chr3	+	38540417	38540480	38539120	38539269	38542846	38542985	3.8955e-06	0.00094728	-0.212	1.04475e-09	7.49568e-07	-0.305	TRUE
ENSG00000172888	ZNF621	chr3	+	40570810	40570936	40567270	40567355	40571700	40571807	5.01437e-09	2.21227e-06	-0.335	1.45275e-08	7.9877e-06	-0.318	TRUE
ENSG00000010322	NISCH	chr3	+	52514895	52515053	52514200	52514311	52518529	52518653	5.02312e-08	1.84677e-05	-0.481	5.01655e-08	2.55325e-05	-0.46	TRUE
ENSG00000010322	NISCH	chr3	+	52514895	52515125	52514155	52514311	52518529	52518653	5.22827e-08	1.88848e-05	-0.485	4.64731e-08	2.38571e-05	-0.464	TRUE
ENSG00000168137	SETD5	chr3	+	9478534	9478572	9477412	9477590	9482140	9482382	1.25788e-13	9.83473e-11	-0.236	2.74136e-05	0.00706689	-0.119	TRUE
ENSG00000164074	ABHD18	chr4	+	128922871	128922915	128905494	128905578	128930075	128930153	9.44648e-05	0.0140258	-0.516	4.8678e-05	0.0114123	-0.436	TRUE
ENSG00000071205	ARHGAP10	chr4	+	148984299	148984451	148968043	148968202	148985567	148985658	7.62468e-12	4.95733e-09	-0.356	8.26006e-13	9.28072e-10	-0.379	TRUE
ENSG00000109685	WHSC1	chr4	+	1900948	1901122	1895457	1895636	1902353	1902978	4.8684e-06	0.00112622	-0.378	3.07687e-05	0.0076663	-0.348	TRUE
ENSG00000065882	TBC1D1	chr4	+	38062241	38062279	38055820	38055959	38091553	38091738	2.22045e-16	2.24833e-13	-0.294	1.74202e-11	1.59593e-08	-0.223	TRUE
ENSG00000109184	DCUN1D4	chr4	+	52726709	52726829	52709269	52709433	52729603	52729673	1.59897e-08	6.33091e-06	-0.193	3.37187e-09	2.13608e-06	-0.205	TRUE
ENSG00000109184	DCUN1D4	chr4	+	52775086	52775141	52765436	52765544	52777236	52777340	0	0	-0.564	0	0	-0.438	TRUE
ENSG00000145216	FIP1L1	chr4	+	54280782	54280889	54265897	54266006	54292039	54292132	1.23457e-13	9.7762e-11	0.246	7.0377e-13	8.21742e-10	0.24	TRUE
ENSG00000188002		chr5	-	1630524	1630681	1629116	1629745	1632759	1632866	4.22924e-06	0.00101643	-0.281	1.10707e-07	5.31654e-05	-0.358	FALSE
ENSG00000122203	KIAA1191	chr5	-	175782574	175782752	175775253	175775359	175786814	175786921	1.13678e-05	0.00232497	-0.287	1.96116e-05	0.00535711	-0.284	TRUE
ENSG00000122203	KIAA1191	chr5	-	175786465	175786570	175782574	175782752	175786814	175786921	1.54321e-14	1.36168e-11	0.365	1.11022e-16	2.20376e-13	0.358	TRUE
ENSG00000122203	KIAA1191	chr5	-	175786484	175786570	175782574	175782752	175786814	175786921	2.9976e-15	2.8053e-12	0.32	0	0	0.315	TRUE
ENSG00000113240	CLK4	chr5	-	178046839	178046897	178043883	178045779	178050257	178050417	2.06679e-10	1.16052e-07	-0.337	9.13138e-10	6.63127e-07	-0.361	TRUE
ENSG00000113240	CLK4	chr5	-	178046839	178047674	178045557	178045779	178050257	178050417	8.43939e-09	3.52208e-06	-0.257	1.21794e-09	8.53262e-07	-0.32	TRUE
ENSG00000050748	MAPK9	chr5	-	179706796	179707036	179696280	179696409	179707440	179707608	2.44333e-10	1.35959e-07	-0.201	1.12483e-08	6.3191e-06	-0.151	TRUE
ENSG00000050748	MAPK9	chr5	-	179713975	179714067	179707440	179707608	179718848	179719053	0	0	-0.56	4.44089e-16	7.77796e-13	-0.448	TRUE
ENSG00000196670	ZFP62	chr5	-	180278988	180279060	180278085	180278493	180287528	180287663	6.25019e-09	2.69965e-06	-0.384	3.68329e-07	0.000162471	-0.232	TRUE
ENSG00000196670	ZFP62	chr5	-	180278988	180279060	180278085	180278493	180288219	180288276	3.94178e-07	0.000121128	-0.353	5.01231e-06	0.00168632	-0.249	TRUE
ENSG00000171617	ENC1	chr5	-	73933319	73933443	73932162	73932323	73936132	73937249	1.25736e-08	5.04298e-06	-0.299	1.80299e-06	0.000697183	-0.264	FALSE
ENSG00000085365	SCAMP1	chr5	+	77745757	77745857	77717625	77717784	77755068	77755185	4.06584e-08	1.50378e-05	0.227	6.44677e-06	0.00205293	0.151	TRUE
ENSG00000241549	GUSBP2	chr6	-	26918865	26918938	26892899	26893054	26924168	26924333	3.13253e-07	9.87164e-05	-0.417	1.91772e-05	0.00527249	-0.326	TRUE
ENSG00000157800	SLC37A3	chr7	-	140045669	140045770	140037084	140037149	140048426	140048567	6.12849e-07	0.000179399	-0.226	6.79572e-05	0.0154457	-0.186	TRUE
ENSG00000106070	GRB10	chr7	-	50772837	50773020	50771518	50771605	50823584	50823761	5.55112e-16	5.53016e-13	-0.352	1.79371e-06	0.000697183	-0.2	TRUE
ENSG00000178234	GALNT11	chr7	+	151724682	151724803	151722799	151722969	151791275	151791607	1.56478e-07	5.16846e-05	-0.23	1.2164e-05	0.00357246	-0.189	TRUE
ENSG00000157954	WIPI2	chr7	+	5232749	5232802	5229877	5230124	5239207	5239289	1.57931e-10	8.94931e-08	-0.323	1.26142e-06	0.000510994	-0.286	TRUE
ENSG00000157954	WIPI2	chr7	+	5232749	5232802	5229877	5230124	5254166	5254335	1.66929e-05	0.00321201	-0.292	0.000191707	0.0374295	-0.266	TRUE
ENSG00000157954	WIPI2	chr7	+	5232749	5232976	5229890	5230124	5239207	5239289	1.28937e-11	8.21022e-09	-0.255	2.0025e-08	1.04603e-05	-0.216	TRUE
ENSG00000196247	ZNF107	chr7	+	64139555	64139714	64126576	64126663	64151626	64151752	2.86555e-06	0.000713683	0.225	0.000235087	0.0441616	0.213	TRUE
ENSG00000136238	RAC1	chr7	+	6438293	6438349	6431555	6431672	6439757	6439819	0	0	-0.283	9.99201e-16	1.60815e-12	-0.223	TRUE
ENSG00000154710	RABGEF1	chr7	+	66235310	66235454	66205720	66205779	66236870	66237022	2.41973e-11	1.49457e-08	-0.368	1.88945e-08	1.00685e-05	-0.395	TRUE
ENSG00000154710	RABGEF1	chr7	+	66235310	66235454	66233818	66234012	66236870	66237022	1.37668e-14	1.25047e-11	-0.65	9.99201e-16	1.60815e-12	-0.662	TRUE
ENSG00000083168	KAT6A	chr8	-	41907094	41907225	41905896	41906820	41909419	41909505	2.22045e-15	2.10997e-12	-0.442	1.11022e-15	1.73981e-12	-0.435	TRUE
ENSG00000083168	KAT6A	chr8	-	41907138	41907225	41905896	41906820	41909419	41909505	6.95013e-11	4.0884e-08	-0.437	4.09717e-12	4.20659e-09	-0.452	TRUE
ENSG00000183808	RBM12B	chr8	-	94752857	94752924	94749535	94749583	94753109	94753184	1.43552e-13	1.10833e-10	-0.4	3.06999e-06	0.00112156	-0.294	TRUE
ENSG00000249859		chr8	+	128808140	128808254	128806806	128806980	128867401	128867565	4.75154e-06	0.00111018	-0.273	0.000130395	0.0272452	-0.251	TRUE
ENSG00000104413	ESRP1	chr8	+	95704905	95705055	95690431	95690599	95709080	95709189	3.29292e-13	2.48037e-10	-0.388	3.78586e-14	5.00987e-11	-0.38	TRUE
ENSG00000104413	ESRP1	chr8	+	95704905	95705055	95690431	95690599	95718153	95719694	1.40647e-11	8.86452e-09	-0.407	6.16472e-09	3.63468e-06	-0.348	TRUE
ENSG00000175893	ZDHHC21	chr9	-	14683569	14683727	14680031	14680160	14690335	14690383	0	0	-0.688	1.46209e-08	7.9877e-06	-0.379	TRUE
ENSG00000148090	AUH	chr9	-	94122561	94122722	94118370	94118437	94123910	94124169	0	0	-0.333	4.22623e-09	2.62154e-06	-0.166	TRUE
ENSG00000130723	PRRC2B	chr9	+	134369792	134369873	134367556	134367647	134371127	134375558	2.40696e-13	1.83541e-10	-0.329	1.21102e-11	1.14468e-08	-0.297	TRUE
ENSG00000130714	POMT1	chr9	+	134379576	134379727	134378335	134378460	134381501	134381607	7.77217e-05	0.0120617	-0.27	3.13825e-07	0.000143754	-0.32	TRUE
ENSG00000107077	KDM4C	chr9	+	7105402	7105500	7103685	7103870	7128066	7128236	1.67673e-05	0.00321629	-0.243	0.000109737	0.023422	-0.248	TRUE
ENSG00000167393	PPP2R3B	chrX	-	322990	323067	322140	322325	347103	347690	5.03796e-11	3.05073e-08	-0.481	4.51451e-07	0.000197672	-0.428	FALSE
ENSG00000125962	ARMCX5	chrX	+	101855848	101855960	101854640	101854775	101856392	101856437	7.44991e-09	3.15172e-06	-0.364	1.55344e-06	0.000612623	-0.342	TRUE
ENSG00000147121	KRBOX4	chrX	+	46330577	46330620	46322633	46322743	46332185	46334073	2.76056e-08	1.04606e-05	-0.564	1.49846e-06	0.00059887	-0.584	TRUE
