# Supplementary material for: HNRNPM controls circRNA biogenesis and splicing fidelity to sustain cancer cell fitness
Source: eLife. 2021 Jun 2;10:e59654. doi: 10.7554/eLife.59654 (PMC8346284; doi:10.7554/eLife.59654)
Supplement: Figure 5—source data 1. [file elife-59654-fig5-data1.xlsx]

## Sheet: Source Data 6
Source Data 6: Binding Status of Significantly Changed Circular RNAs
circRNA	log2FoldChange B7/SCR	pvalue B7/SCR	log2FoldChange B9/SCR	pvalue B9/SCR	bound	External ID
AARS_chr16_70292882_70296427_-	-5.424	5.18687e-05	-5.85867	9.94201e-06	TRUE	circ_87516
ABCC4_chr13_95813442_95818621_-	-4.93932	0.000416318	-5.37419	9.94219e-05	TRUE	circ_173781
ACSF3_chr16_89164998_89169167_+	4.92206	0.000337786	5.41058	3.03512e-05	TRUE	circ_153702
AFTPH_chr2_64778576_64780543_+	4.79782	0.000577453	4.82111	0.000408072	TRUE	circ_46794
AKAP7_chr6_131466424_131490413_+	-5.11902	0.000202453	-5.55327	4.46979e-05	TRUE	circ_78483
ANKH_chr5_14741935_14758707_-	4.93621	0.000367104	4.63311	0.000749937	TRUE	circ_160750
ANKHD1_chr5_139819703_139825560_+	4.67266	0.000896887	4.63099	0.000779683	TRUE	circ_164370
ANKRD11_chr16_89484691_89497734_-	5.5858	2.52929e-05	6.30635	4.10691e-07	TRUE	circ_121739
ANKRD12_chr18_9182379_9221997_+	1.07767	0.000606324	1.47982	1.4776e-07	TRUE	circ_82144
ANKRD17_chr4_73950965_73958017_-	5.0772	0.000237573	4.50098	0.0012966	TRUE	circ_178290
ANKS1B_chr12_100166699_100175875_-	5.42611	4.26505e-05	5.59941	1.28179e-05	TRUE	circ_122275
APOOL_chrX_84322132_84329397_+	5.3009	7.64967e-05	5.7347	6.77279e-06	TRUE	circ_77513
APPL1_chr3_57276883_57301820_+	-5.73369	1.43859e-05	-6.16702	2.44398e-06	FALSE	--
ARFGEF3_chr6_138528178_138531178_+	4.81607	0.000512687	4.69822	0.000591705	TRUE	circ_100943
ARHGAP10_chr4_148860975_148876525_+	5.81121	6.48912e-06	6.54519	1.17302e-07	TRUE	circ_96252
ARHGAP32_chr11_128963515_129034322_-	5.75976	8.21858e-06	6.10127	1.25532e-06	TRUE	circ_71450
ARHGEF12_chr11_120345268_120348235_+	4.67173	0.000869967	4.94674	0.000245545	TRUE	circ_102365
ARSG_chr17_66303083_66303852_+	-5.0304	0.000288236	-5.46512	6.60619e-05	TRUE	circ_167793
ARSG_chr17_66303083_66416647_+	-5.29668	9.56265e-05	-5.72767	1.97291e-05	TRUE	--
ASAP1_chr8_131370262_131374017_-	5.74639	9.46168e-06	5.83358	4.44503e-06	TRUE	circ_51708
ASCC1_chr10_73956568_73973089_-	-5.02493	0.00029761	-5.46121	6.809e-05	FALSE	circ_81198
ASH1L_chr1_155408117_155429689_-	-6.17463	1.98789e-06	-1.10247	0.0370265	TRUE	circ_63823
ASPH_chr8_62460629_62479877_-	6.26801	7.09192e-07	6.63472	7.28703e-08	TRUE	circ_154559
ASPH_chr8_62489330_62531578_-	6.89065	2.4869e-08	6.49446	1.55424e-07	TRUE	circ_46672
ASPH_chr8_62531536_62559437_-	5.68714	1.18394e-05	5.27273	7.52621e-05	TRUE	circ_45292
ATG7_chr3_11399891_11468400_+	5.11171	0.000153734	5.10061	0.000120345	TRUE	circ_35021
ATP6V1D_chr14_67812484_67814170_-	-5.57729	2.84992e-05	-6.00699	5.23107e-06	TRUE	circ_88432
ATXN10_chr22_46085591_46136418_+	1.03257	0.0297764	1.73027	3.99187e-06	TRUE	circ_53581
ATXN10_chr22_46125304_46136418_+	2.10195	7.54887e-11	2.07938	7.76337e-12	TRUE	circ_90165
AXIN1_chr16_354303_364683_-	4.46606	0.00186061	5.8825	4.05686e-06	TRUE	circ_42341
AXIN1_chr16_354303_397106_-	5.30028	6.77685e-05	6.70464	5.22451e-08	TRUE	circ_6583
BDP1_chr5_70797388_70808255_+	-5.28939	9.49606e-05	-5.72199	1.9481e-05	TRUE	--
BIRC6_chr2_32602655_32641231_+	5.68774	1.2179e-05	6.05885	1.54742e-06	TRUE	circ_150026
BTBD7_chr14_93760203_93762503_-	5.41876	3.96765e-05	4.95326	0.000228123	TRUE	circ_12735
CAMSAP1_chr9_138741982_138758382_-	4.67266	0.000896887	4.82017	0.000380882	TRUE	--
CAMSAP2_chr1_200729966_200801973_+	-4.85083	0.000591056	-5.28276	0.00014849	TRUE	circ_24206
CAPN15_chr16_583945_586142_+	4.8512	0.000457917	4.49664	0.00127276	TRUE	circ_172877
CAPRIN1_chr11_34110941_34113603_+	-5.33372	8.98221e-05	-5.77321	1.78843e-05	TRUE	circ_83077
CCDC134_chr22_42204878_42206295_+	4.48882	0.00171607	5.63741	1.07572e-05	FALSE	circ_59030
CCDC91_chr12_28378727_28412375_+	5.31885	6.43505e-05	6.35109	3.20707e-07	TRUE	circ_129516
CCDC91_chr12_28408513_28460682_+	5.05836	0.000194399	4.88761	0.000293078	TRUE	circ_125076
CDK14_chr7_90355880_90356126_+	-4.8411	0.000609043	-5.27519	0.000152423	TRUE	circ_173639
CDK8_chr13_26911703_26928017_+	5.18525	0.000115999	4.92275	0.000324065	TRUE	circ_75545
CEP192_chr18_12999419_13030607_+	1.43682	0.0010207	1.47427	0.000282144	TRUE	circ_8110
CEP192_chr18_12999419_13073184_+	5.01288	0.000244161	5.53072	1.81677e-05	TRUE	--
CEP70_chr3_138289159_138291774_-	6.32191	5.26484e-07	6.08019	1.61868e-06	TRUE	circ_27887
CHD1L_chr1_146747016_146757164_+	4.36983	0.00258161	4.05096	0.0055954	TRUE	circ_67730
CLASP2_chr3_33725850_33738425_-	5.57816	1.91067e-05	5.79599	5.26065e-06	TRUE	circ_126296
CNOT1_chr16_58608512_58617086_-	-4.93597	0.000420745	-5.37121	0.000100467	FALSE	circ_159512
COA1_chr7_43679047_43680248_-	-6.08262	2.19694e-06	-6.51583	3.18549e-07	TRUE	circ_22695
CPT1A_chr11_68527036_68529155_-	6.03961	2.17309e-06	5.37067	3.62299e-05	TRUE	circ_166165
CREBBP_chr16_3900297_3901010_-	-5.29951	9.86362e-05	-5.73018	2.04337e-05	TRUE	circ_126448
CTBP1_chr4_1219147_1235307_-	2.56328	1.82996e-18	3.10232	1.44489e-31	TRUE	circ_59236
CTBP2_chr10_126727565_126799662_-	5.58505	2.15561e-05	6.16482	9.39237e-07	TRUE	circ_157920
CTNNB1_chr3_41265511_41280845_+	4.57859	0.00124638	4.56363	0.00103073	TRUE	circ_24531
CWF19L2_chr11_107260799_107263621_-	4.81515	0.000531792	5.23448	7.82844e-05	TRUE	circ_148001
CWF19L2_chr11_107260799_107289013_-	6.51187	1.85586e-07	6.43245	2.10884e-07	TRUE	circ_93259
DCAF6_chr1_167921037_167944253_+	5.13463	0.000140025	5.66556	9.69095e-06	TRUE	circ_52272
DCAF6_chr1_167935866_167944253_+	4.46606	0.00186061	4.7039	0.000583125	TRUE	circ_119809
DDX21_chr10_70719561_70720005_+	-5.03355	0.00027992	-5.46792	6.40489e-05	FALSE	circ_117768
DIP2C_chr10_518378_532470_-	5.24089	0.000100736	6.07255	1.38613e-06	TRUE	circ_51452
DIS3L2_chr2_232879544_232894790_+	6.07752	1.81012e-06	6.94558	1.33521e-08	TRUE	circ_144577
DNAH14_chr1_225140371_225156576_+	-4.93932	0.000416318	-5.37419	9.94219e-05	TRUE	circ_157375
DNAH14_chr1_225266908_225284941_+	5.36344	5.14344e-05	5.50039	2.19688e-05	TRUE	circ_75055
DOCK1_chr10_128768965_128798571_+	6.19238	1.04525e-06	6.41682	2.42119e-07	TRUE	circ_155357
DOCK1_chr10_128768965_128860040_+	5.54524	2.50742e-05	5.83635	4.7393e-06	TRUE	circ_73621
DOCK1_chr10_128768965_128908618_+	5.66175	1.29681e-05	6.42523	2.51734e-07	TRUE	circ_8366
DOCK1_chr10_128768965_129055693_+	1.2098	0.00279443	2.16534	3.74656e-10	TRUE	circ_27854
DYM_chr18_46858233_46906128_-	-5.94854	4.48821e-06	-6.38136	6.91081e-07	TRUE	circ_93545
EEFSEC_chr3_127980970_127983624_+	5.3122	6.92403e-05	4.99116	0.000189903	FALSE	circ_101423
EHMT1_chr9_140611077_140646860_+	4.96364	0.000311581	5.44404	3.03812e-05	TRUE	circ_120198
EHMT1_chr9_140611077_140712590_+	4.9876	0.000252032	4.62615	0.000811483	TRUE	circ_39608
EIF3E_chr8_109240495_109254142_-	4.59889	0.00117501	4.99624	0.000199075	TRUE	circ_177344
EMC2_chr8_109462051_109462721_+	4.8539	0.000509367	4.95485	0.000240749	TRUE	circ_114502
EML5_chr14_89192884_89221015_-	4.83482	0.000486685	4.76566	0.000474161	TRUE	circ_33604
ENGASE_chr17_77073511_77073946_+	-5.27497	0.00010212	-5.71076	2.0871e-05	FALSE	circ_175826
EPB41L5_chr2_120830753_120836157_+	5.14818	0.000138348	5.04297	0.000165386	TRUE	circ_59560
EPB41L5_chr2_120885263_120903865_+	4.73119	0.000714853	5.37657	3.61505e-05	TRUE	circ_134045
ERBB2_chr17_37864573_37866734_+	-6.00655	3.61972e-06	-6.43649	5.51145e-07	TRUE	circ_135749
ERBIN_chr5_65284462_65290692_+	-6.22926	1.14826e-06	-1.48905	0.00499086	TRUE	--
ERBIN_chr5_65307876_65350779_+	5.71245	1.07343e-05	5.66921	9.57784e-06	TRUE	--
ERBIN_chr5_65317149_65350779_+	5.33277	6.07e-05	5.53418	1.94337e-05	TRUE	--
ERC1_chr12_1213915_1225199_+	5.70731	1.07331e-05	5.64223	1.20822e-05	TRUE	circ_14320
ERC1_chr12_1213915_1399178_+	5.52978	2.565e-05	5.60139	1.26319e-05	TRUE	--
ERC1_chr12_1250785_1299218_+	5.55453	2.78195e-05	6.6755	6.24795e-08	TRUE	--
ERC1_chr12_1289705_1299218_+	6.80221	3.85025e-08	7.09305	6.04472e-09	TRUE	circ_93950
ERGIC1_chr5_172359438_172362313_+	-5.30143	9.77214e-05	-5.73108	2.02788e-05	TRUE	circ_147896
ETFA_chr15_76576097_76588078_-	4.76006	0.000621934	4.70644	0.000579294	TRUE	circ_31468
ETFA_chr15_76584771_76588078_-	-5.19277	0.000149694	-5.62939	3.17337e-05	TRUE	circ_30746
ETNK1_chr12_22796696_22826594_+	5.23441	0.000100496	4.8964	0.000286618	TRUE	circ_136218
EXTL3_chr8_28570973_28575724_+	4.99592	0.000243421	5.04938	0.000153496	TRUE	circ_102406
EZH2_chr7_148543561_148544397_-	-4.73292	0.000924564	-5.16756	0.000242782	TRUE	circ_18454
FAM120A_chr9_96233422_96238620_+	-1.35358	0.00688215	-2.08005	5.20225e-05	TRUE	circ_162125
FAM120B_chr6_170626457_170639638_+	4.99592	0.000243421	4.6382	0.000786652	TRUE	circ_159650
FAM13B_chr5_137342678_137356886_-	1.59788	0.000679456	2.54139	3.10762e-10	TRUE	circ_11245
FAM216A_chr12_110922882_110925748_+	-5.48316	4.35199e-05	-5.91914	8.14157e-06	FALSE	circ_3803
FAM53B_chr10_126370175_126370948_-	-5.4131	5.77342e-05	-5.85044	1.10742e-05	TRUE	--
FAM53B_chr10_126370175_126395456_-	5.04445	0.000233656	4.87745	0.000310123	TRUE	--
FANCL_chr2_58425728_58459247_-	5.1046	0.000159333	5.28735	5.49552e-05	TRUE	circ_100350
FARP2_chr2_242343242_242357524_+	4.82548	0.000493664	4.63696	0.000734445	TRUE	circ_86297
FBXL17_chr5_107356625_107559929_-	7.00589	1.23434e-08	7.04998	7.92282e-09	TRUE	circ_113638
FBXL17_chr5_107521817_107559929_-	6.93795	1.83572e-08	7.10758	5.81223e-09	TRUE	--
FBXL17_chr5_107521817_107684231_-	6.28837	7.09321e-07	6.09501	1.72245e-06	TRUE	circ_119422
FGD4_chr12_32751430_32764217_+	4.97207	0.000280185	4.8166	0.000406419	FALSE	circ_20245
FGGY_chr1_59787207_59812070_+	5.89596	4.42301e-06	5.05978	0.000150159	TRUE	circ_34910
FGGY_chr1_59787207_59844509_+	1.59475	0.00241632	1.44886	0.00318669	TRUE	circ_176653
FIRRE_chrX_130883333_130928494_-	4.69268	0.000847607	4.24167	0.00300624	TRUE	circ_157623
FNDC3B_chr3_171830241_171851336_+	5.21916	0.000105406	5.04215	0.000156861	TRUE	circ_147424
FNDC3B_chr3_171965322_171969331_+	5.17665	0.000121689	4.4986	0.00126627	TRUE	circ_103104
FOCAD_chr9_20715320_20740339_+	6.16305	1.12297e-06	6.02458	1.85078e-06	TRUE	circ_164332
FOCAD_chr9_20715320_20770237_+	4.82473	0.000490672	4.32649	0.00227627	TRUE	circ_103524
FOXJ3_chr1_42730785_42776781_-	4.89545	0.000376939	5.45619	2.49694e-05	TRUE	circ_110449
GALK2_chr15_49517401_49531564_+	5.04364	0.000202882	4.94864	0.000225892	TRUE	circ_1203
GALK2_chr15_49517401_49584734_+	5.68717	1.25233e-05	6.52444	1.34235e-07	TRUE	--
GALK2_chr15_49528047_49531564_+	6.40712	3.69739e-07	6.92723	1.49639e-08	TRUE	circ_157905
GALK2_chr15_49528047_49584734_+	6.10052	1.82163e-06	5.96958	2.20124e-06	TRUE	circ_89180
GARS_chr7_30661008_30662078_+	-5.41051	6.03408e-05	-5.84814	1.16013e-05	TRUE	circ_31159
GDI2_chr10_5827104_5842668_-	-1.13081	0.03287	-6.75961	8.33686e-08	TRUE	circ_53890
GNB1_chr1_1747194_1756938_-	-5.11902	0.000202453	-5.55327	4.46979e-05	TRUE	circ_34026
GRB10_chr7_50737418_50823753_-	6.4865	2.21591e-07	6.80961	3.02433e-08	TRUE	circ_81052
GRB10_chr7_50771517_50823753_-	5.10381	0.000165834	5.82939	4.70201e-06	TRUE	circ_31530
GRHL2_chr8_102570646_102571040_+	-1.13434	0.0280855	-1.23867	0.00993588	TRUE	circ_88012
GTF2E1_chr3_120469369_120469847_+	5.26643	8.07852e-05	5.53573	1.99966e-05	TRUE	circ_99649
GUCY1A3_chr4_156617957_156643344_+	5.16413	0.000132719	5.61209	1.40294e-05	TRUE	circ_117371
GULP1_chr2_189248489_189248616_+	4.86952	0.000421579	5.10492	0.000115057	TRUE	circ_175351
GULP1_chr2_189248489_189348219_+	5.17852	0.000130101	4.7036	0.000598206	TRUE	circ_104634
GUSBP1_chr5_21491429_21497305_+	-4.95085	0.000401931	-5.38243	9.66761e-05	TRUE	circ_81267
HAT1_chr2_172782046_172844276_+	-5.42812	5.1241e-05	-5.86162	9.84794e-06	FALSE	circ_15423
HDGFL3_chr15_83819966_83832827_-	4.85173	0.000436793	4.70275	0.000579458	TRUE	--
HERPUD2_chr7_35707043_35712888_-	5.25086	0.000102463	5.00241	0.000201015	TRUE	circ_26580
HNRNPM_chr19_8520288_8528570_+	-5.49195	3.82835e-05	-5.92627	7.13107e-06	TRUE	circ_83886
HOMER1_chr5_78692645_78752841_-	4.57766	0.00124744	4.57934	0.00107403	TRUE	circ_158775
IGF2R_chr6_160467529_160469575_+	5.17792	0.000117259	5.55899	1.68108e-05	TRUE	circ_17348
IQSEC1_chr3_12976947_12983365_-	4.62044	0.00114084	5.60927	1.41142e-05	TRUE	circ_46531
ITCH_chr20_33057852_33080402_+	4.96354	0.000289775	4.82727	0.000383732	TRUE	circ_93525
KDM1A_chr1_23356961_23385660_+	-5.54965	3.34458e-05	-5.98644	6.08752e-06	FALSE	circ_144951
KDM4B_chr19_5016267_5041262_+	5.69907	1.29684e-05	5.99585	2.20911e-06	TRUE	circ_72354
KDM6A_chrX_44870205_44879975_+	5.06693	0.000183187	5.04963	0.000144001	TRUE	circ_84025
KDM6A_chrX_44870205_44896934_+	6.11869	1.51806e-06	6.32912	3.67207e-07	TRUE	--
KLHL24_chr3_183361267_183369064_+	-5.50444	3.69047e-05	-5.93598	6.91225e-06	TRUE	circ_124281
KLHL24_chr3_183361267_183390272_+	-5.1446	0.000204311	-5.57424	4.58713e-05	TRUE	circ_119280
KMT2C_chr7_152007050_152055760_-	5.82529	6.82434e-06	5.71083	8.19392e-06	TRUE	circ_118971
KPNA5_chr6_117019866_117026323_+	4.68132	0.000861045	4.69641	0.000641712	TRUE	circ_91339
KPNB1_chr17_45740454_45752148_+	-5.03894	0.000275352	-5.47177	6.32187e-05	TRUE	circ_144592
KTN1_chr14_56078736_56086030_+	5.59406	1.83495e-05	5.91919	2.89053e-06	TRUE	circ_138886
LARP4_chr12_50821544_50835426_+	4.46606	0.00186061	5.05542	0.000141961	TRUE	circ_87016
LARP4B_chr10_909682_931700_-	5.40035	4.49567e-05	5.57265	1.53489e-05	TRUE	circ_100340
LOC101929709_chr8_90734242_90737869_-	4.51161	0.00163777	5.70746	7.92926e-06	FALSE	--
LONP2_chr16_48311248_48337216_+	4.75027	0.000648068	5.05252	0.000141775	FALSE	circ_96890
LPCAT1_chr5_1488505_1501718_-	4.68132	0.000861045	5.77622	6.22868e-06	TRUE	circ_20627
LRBA_chr4_151682934_151729550_-	5.67666	1.23253e-05	5.25486	6.97377e-05	TRUE	circ_38235
LRBA_chr4_151719232_151729550_-	4.26671	0.00366191	4.5618	0.000980974	TRUE	circ_41444
LRRC37A4P_chr17_43590550_43592891_-	-5.50179	4.41888e-05	-5.93286	8.41818e-06	FALSE	--
MAN1A2_chr1_117944807_117948267_+	-1.19317	0.0215414	-6.91502	3.98857e-08	TRUE	circ_95977
MAP2K4_chr17_11958205_12016677_+	-5.04529	0.000279473	-5.47742	6.43815e-05	TRUE	circ_109106
MAP2K4_chr17_11984672_12016677_+	-4.62313	0.0013903	-5.05637	0.000385808	TRUE	circ_12297
MAPK1_chr22_22160138_22162135_-	-4.62313	0.0013903	-5.05637	0.000385808	TRUE	circ_72893
MCTP2_chr15_94841429_94841959_+	-5.8429	7.20925e-06	1.31379	0.00114048	TRUE	circ_129595
ME1_chr6_84055891_84117620_-	4.26671	0.00366191	4.64296	0.000756038	TRUE	circ_93181
MED13L_chr12_116534473_116675510_-	1.11481	0.0481416	1.76868	0.000504069	TRUE	circ_166898
MGA_chr15_41961025_42005694_+	4.97147	0.000273733	5.37638	3.61645e-05	TRUE	circ_175090
MGA_chr15_41988272_42005694_+	5.11235	0.000153045	4.56398	0.00098852	TRUE	circ_76745
MID2_chrX_107083899_107097934_+	1.28526	0.00226398	1.08865	0.00758877	TRUE	circ_87568
MIPOL1_chr14_37754522_37777724_+	5.46318	4.02543e-05	4.76839	0.000454864	TRUE	circ_65200
MKL2_chr16_14173146_14234617_+	6.20922	9.05804e-07	6.5471	1.39897e-07	TRUE	circ_49385
MLLT1_chr19_6230580_6270770_-	6.1755	1.22399e-06	7.95684	3.6121e-11	TRUE	circ_116126
MME_chr3_154801946_154836600_+	5.03604	0.000217256	5.68222	1.05705e-05	TRUE	circ_129093
MPP5_chr14_67736417_67770316_+	5.09905	0.000186081	5.27903	5.88693e-05	TRUE	circ_108995
MTDH_chr8_98698895_98703416_+	4.78784	0.000582866	4.4957	0.00131734	FALSE	circ_124963
MTUS1_chr8_17601112_17613470_-	5.3449	5.67366e-05	4.70191	0.000574308	TRUE	circ_8284
MYCBP2_chr13_77779390_77818086_-	1.54454	0.000116957	1.59069	2.73512e-05	TRUE	circ_19779
MYCBP2_chr13_77817193_77870809_-	5.32063	6.7642e-05	6.39494	2.70404e-07	TRUE	--
MYCBP2_chr13_77825285_77862511_-	5.12701	0.000141457	5.23652	7.79047e-05	TRUE	circ_9815
MYCBP2_chr13_77825285_77870809_-	1.35082	0.00117767	2.3174	9.10368e-11	TRUE	circ_97993
MYCBP2_chr13_77852892_77870809_-	-5.28486	9.77983e-05	-5.71875	2.00305e-05	TRUE	circ_69191
MYO9A_chr15_72300166_72338975_-	4.6821	0.000845454	4.75768	0.00049273	TRUE	circ_95325
NDUFS4_chr5_52942062_52954454_+	4.87067	0.000439807	4.69349	0.000651539	TRUE	circ_121678
NEMF_chr14_50292584_50298079_-	-5.2074	0.000148927	-5.63983	3.20069e-05	FALSE	circ_38455
NF1_chr17_29483000_29509683_+	5.2871	7.42925e-05	5.60446	1.28023e-05	TRUE	circ_53544
NME7_chr1_169199955_169268001_-	6.68773	7.85653e-08	6.31755	4.24645e-07	TRUE	--
NOL12_chr22_38083916_38084999_+	-5.21382	0.000140275	-5.64641	2.99471e-05	FALSE	circ_145853
NPEPPS_chr17_45695715_45696530_+	-5.36079	8.28279e-05	-5.7926	1.6784e-05	FALSE	circ_70140
NSD1_chr5_176636636_176639196_+	4.46606	0.00186061	4.0554	0.00553344	TRUE	circ_41426
NSD2_chr4_1902352_1906105_+	-5.87949	6.55597e-06	-6.31633	1.02747e-06	TRUE	--
NUP205_chr7_135262543_135277940_+	-5.4288	5.26408e-05	-5.86294	1.01165e-05	FALSE	circ_141468
NUP54_chr4_77065301_77065626_-	-4.74339	0.00089531	-5.17571	0.000236039	TRUE	circ_164098
NUSAP1_chr15_41648236_41669502_+	-6.2033	1.20335e-06	-6.6379	1.6539e-07	FALSE	circ_71023
OBSCN_chr1_228486959_228487846_+	-4.8349	0.000632381	-5.27075	0.000158003	TRUE	--
OGDH_chr7_44684925_44687358_+	4.69159	0.000822473	5.5299	1.89246e-05	TRUE	circ_27685
ORC4_chr2_148730307_148739650_-	5.46716	3.62305e-05	5.97502	2.16512e-06	TRUE	circ_73639
PCCA_chr13_100953713_100962162_+	5.21996	0.000100586	5.63334	1.19875e-05	TRUE	circ_99341
PCGF3_chr4_724418_738476_+	5.64552	1.53387e-05	5.79422	5.43701e-06	TRUE	--
PDIA4_chr7_148716083_148718239_-	5.02702	0.000231116	4.70644	0.000579294	TRUE	circ_114206
PFDN2_chr1_161071837_161072165_-	-8.18716	1.25034e-11	-8.62066	8.14641e-13	FALSE	circ_54345
PHF14_chr7_11021998_11030474_+	4.90509	0.000366398	4.94141	0.000224307	TRUE	circ_101660
PHKB_chr16_47531309_47581459_+	5.41251	4.17569e-05	5.72776	7.50855e-06	TRUE	circ_30400
PICALM_chr11_85692171_85742653_-	-5.68316	1.64049e-05	-6.11666	2.82667e-06	TRUE	circ_66478
PIGN_chr18_59739905_59763183_-	4.64093	0.00102179	5.66257	1.00833e-05	TRUE	circ_133347
PIK3C3_chr18_39607406_39629569_+	4.38259	0.00249387	3.94621	0.00773498	FALSE	circ_7992
PIP5K1C_chr19_3660963_3661999_-	-4.93597	0.000420745	-5.37121	0.000100467	TRUE	circ_86025
PITPNB_chr22_28290542_28310335_-	-4.94507	0.000401351	-5.3783	9.60031e-05	TRUE	--
PMS1_chr2_190656515_190682906_+	-1.39865	0.00197197	-1.18702	0.00228017	TRUE	circ_173015
POLA1_chrX_24828014_24906239_+	4.47797	0.00177092	4.33756	0.00229831	TRUE	circ_16387
PPFIA2_chr12_81833750_81851645_-	5.64645	1.46949e-05	5.95479	2.77091e-06	TRUE	circ_158444
PPP1R12C_chr19_55610151_55614936_-	5.611	2.03289e-05	6.61601	8.08482e-08	TRUE	circ_30728
PPP3CA_chr4_102001688_102020879_-	5.02042	0.000233727	4.94452	0.000220727	TRUE	circ_13256
PPP3CA_chr4_102001688_102117273_-	5.12001	0.000149897	4.70474	0.000570154	TRUE	circ_2921
PRKACB_chr1_84644859_84680000_+	1.03619	0.000275762	1.56548	2.35568e-10	TRUE	circ_32393
PRKAR1B_chr7_716865_751164_-	5.06035	0.00021529	6.30087	4.81864e-07	TRUE	circ_135659
PRRG1_chrX_37245851_37285253_+	4.5562	0.00136706	5.83111	4.63675e-06	TRUE	circ_14804
PRUNE2_chr9_79244107_79259825_-	-5.28412	9.93461e-05	-5.7173	2.04245e-05	TRUE	--
PSD3_chr8_18622958_18662408_-	1.46671	2.79251e-10	1.85975	1.51493e-19	TRUE	circ_59337
PTK2_chr8_141828375_141900868_-	1.75662	0.000189577	1.78429	4.5312e-05	TRUE	circ_144206
PTPN13_chr4_87685745_87689129_+	-4.93932	0.000416318	-5.37419	9.94219e-05	TRUE	circ_113706
PTPRA_chr20_2944917_2945848_+	-5.54301	3.24377e-05	-5.98054	5.87298e-06	TRUE	circ_77889
PTPRN2_chr7_157449048_157475629_-	5.08096	0.00019179	5.79814	5.04829e-06	FALSE	circ_124360
PUM1_chr1_31465236_31468067_-	-5.79309	9.20523e-06	-1.28899	0.0292103	TRUE	circ_3296
QSER1_chr11_32948702_32956981_+	4.5562	0.00136706	5.00117	0.000179447	TRUE	circ_91867
RAB23_chr6_57058639_57075243_-	5.1046	0.000159333	6.17593	9.38091e-07	TRUE	circ_69316
RAB3IP_chr12_70193988_70195501_+	-1.47392	0.00524439	-6.93537	3.22074e-08	TRUE	circ_168358
RAB6A_chr11_73418464_73431944_-	5.91254	4.0046e-06	5.67803	1.11236e-05	TRUE	circ_37884
RAB6A_chr11_73418464_73441868_-	-5.68407	1.64522e-05	-6.11624	2.84746e-06	TRUE	circ_19500
RAD23B_chr9_110062421_110074018_+	-5.133	0.000190122	-5.56482	4.20609e-05	TRUE	circ_92809
RAD54B_chr8_95390407_95423543_-	5.83444	5.82337e-06	6.57216	1.22551e-07	TRUE	circ_154514
RANBP17_chr5_170319390_170351554_+	-4.93597	0.000420745	-5.37121	0.000100467	TRUE	circ_160176
RAPGEF5_chr7_22306582_22357656_-	5.63141	1.52701e-05	5.49483	2.11928e-05	TRUE	--
RBBP8_chr18_20569183_20581692_+	-4.74339	0.00089531	-5.17571	0.000236039	FALSE	circ_136194
RBM33_chr7_155457868_155473602_+	4.93803	0.000314086	4.95005	0.00022165	TRUE	circ_44995
RBM6_chr3_50102463_50103935_+	-5.12415	0.000205034	-5.55693	4.55368e-05	TRUE	circ_169197
REPS2_chrX_17121840_17157084_+	4.87783	0.000422306	5.49988	2.17908e-05	TRUE	circ_46559
RPRD1B_chr20_36685933_36694658_+	5.14806	0.000143147	4.76566	0.000474161	TRUE	circ_51692
RPS5_chr19_58904342_58904854_+	-5.11389	0.000205642	-5.54961	4.52532e-05	FALSE	circ_77791
RPS6KA6_chrX_83351201_83362733_-	6.08221	1.72668e-06	6.47542	1.70562e-07	TRUE	circ_159049
RPS6KA6_chrX_83351201_83375035_-	5.54187	2.71936e-05	5.16134	0.000100613	TRUE	circ_97755
RPS6KA6_chrX_83389789_83419395_-	4.74121	0.000677716	4.89386	0.000285137	TRUE	--
RPS6KC1_chr1_213290658_213303232_+	5.1194	0.000145892	5.59694	1.34726e-05	TRUE	circ_81680
RREB1_chr6_7176887_7189555_+	6.02377	2.24926e-06	6.24321	5.61858e-07	TRUE	circ_82481
RUSC2_chr9_35546426_35548532_+	-4.73955	0.000906109	-5.17229	0.000238881	FALSE	circ_59995
SCAF11_chr12_46319924_46322642_-	-5.55685	2.87457e-05	-5.99084	5.21352e-06	TRUE	circ_120880
SCAMP1_chr5_77684660_77755185_+	5.46091	3.40133e-05	5.95298	2.86256e-06	TRUE	circ_25331
SDF4_chr1_1158623_1159348_-	6.91954	2.0031e-08	7.47161	6.87551e-10	TRUE	--
SDHAF2_chr11_61205096_61205585_+	4.8512	0.000457917	5.09869	0.000117825	TRUE	--
SEC24B_chr4_110412482_110416012_+	-5.11389	0.000205642	-5.54961	4.52532e-05	FALSE	circ_8625
SEC31A_chr4_83793096_83796975_-	-5.45349	5.54917e-05	-5.88196	1.09122e-05	TRUE	circ_45416
Sep-09_chr17_75398140_75398785_+	5.6249	1.77558e-05	5.105	0.000169194	TRUE	--
SIPA1L2_chr1_232649602_232651354_-	-4.93932	0.000416318	-5.37419	9.94219e-05	TRUE	circ_113130
SIRT5_chr6_13579682_13601181_+	4.94629	0.000314996	5.15897	0.000111126	TRUE	circ_117403
SLAIN1_chr13_78293666_78327493_+	1.19353	0.00294934	1.55405	1.57166e-05	TRUE	circ_36453
SLC30A6_chr2_32399131_32409407_+	-5.38075	7.36506e-05	-5.80964	1.48808e-05	FALSE	circ_72110
SLC39A8_chr4_103225473_103236987_-	-4.93932	0.000416318	-5.37419	9.94219e-05	TRUE	circ_83437
SLC4A4_chr4_72102292_72121116_+	2.0702	2.08981e-25	3.19931	1.14404e-80	TRUE	circ_116561
SLC4A4_chr4_72102292_72222904_+	6.21657	9.12829e-07	7.92917	4.26432e-11	TRUE	circ_173021
SLC4A4_chr4_72120936_72121116_+	5.37629	4.79516e-05	7.55319	4.57306e-10	TRUE	circ_128930
SLC4A7_chr3_27424643_27493989_-	4.82548	0.000493664	5.59269	1.42262e-05	TRUE	circ_39969
SLCO5A1_chr8_70650274_70674110_-	-5.41051	6.03408e-05	-5.84814	1.16013e-05	TRUE	circ_55046
SLTM_chr15_59204761_59205895_-	-4.73292	0.000924564	-5.16756	0.000242782	TRUE	circ_116244
SMARCC1_chr3_47702783_47719801_-	-5.02493	0.00029761	-5.46121	6.809e-05	TRUE	circ_150511
SMARCC1_chr3_47770514_47814426_-	5.5454	2.36126e-05	5.20134	7.69094e-05	TRUE	circ_90681
SMYD3_chr1_246078831_246093239_-	5.06693	0.000183187	5.1573	0.000100816	TRUE	circ_149930
SMYD3_chr1_246490502_246498776_-	5.51763	2.5337e-05	5.10343	0.000120289	TRUE	circ_130685
SNX27_chr1_151611363_151641111_+	4.47797	0.00177092	4.49334	0.00125388	TRUE	circ_75251
SNX5_chr20_17928129_17937681_-	4.46606	0.00186061	4.82778	0.000361613	TRUE	circ_135335
SPATA6_chr1_48821341_48825442_-	-5.04133	0.000296669	-5.47292	6.89421e-05	TRUE	circ_116121
SPECC1L_chr22_24698162_24709434_+	5.21251	0.000100253	4.94212	0.000226096	TRUE	circ_44317
SPECC1L_chr22_24698162_24743144_+	4.59889	0.00117501	5.36898	4.03911e-05	TRUE	circ_104721
SPICE1_chr3_113207791_113225452_-	1.57198	0.000222372	1.58605	0.000100563	TRUE	circ_91854
SPIDR_chr8_48192449_48206619_+	1.11443	0.0103745	1.93119	1.76394e-07	TRUE	circ_1547
STK33_chr11_8457040_8486369_-	-5.21382	0.000140275	-5.64641	2.99471e-05	TRUE	circ_87364
STRN3_chr14_31404368_31425448_-	5.34542	6.32155e-05	5.41509	2.97039e-05	FALSE	circ_70123
STXBP5L_chr3_120628417_120876474_+	5.40677	4.24223e-05	6.10421	1.17623e-06	TRUE	circ_68736
STXBP5L_chr3_120924769_120952535_+	5.71605	1.1002e-05	6.20006	7.14228e-07	TRUE	circ_39888
STXBP5L_chr3_120924769_120978015_+	4.65169	0.000950544	4.64784	0.000778418	TRUE	--
STXBP5L_chr3_120924769_120998803_+	5.20525	0.000102194	4.77282	0.000480597	TRUE	circ_23607
STXBP5L_chr3_121097562_121100379_+	6.08635	1.96324e-06	6.55826	1.18378e-07	TRUE	circ_113762
SUPT20H_chr13_37614541_37625720_-	-4.94507	0.000401351	-5.3783	9.60031e-05	TRUE	circ_15489
TBC1D14_chr4_6925099_6925838_+	6.16335	1.12382e-06	6.6455	8.02125e-08	TRUE	circ_118600
TBC1D14_chr4_6925099_6969151_+	6.72179	6.54043e-08	7.71946	1.52548e-10	TRUE	circ_142805
TBC1D31_chr8_124089350_124132428_+	-4.62313	0.0013903	-5.05637	0.000385808	TRUE	circ_13815
TBCD_chr17_80842020_80861354_+	6.33856	4.54635e-07	6.71981	4.58455e-08	TRUE	circ_52606
TBCD_chr17_80842020_80869665_+	5.82414	6.48924e-06	5.71039	8.13654e-06	TRUE	--
TBCD_chr17_80858526_80869665_+	6.88838	2.56194e-08	5.85336	3.97452e-06	TRUE	--
TBCD_chr17_80863811_80869665_+	5.45436	3.47239e-05	5.7887	5.82302e-06	TRUE	circ_86069
TET2_chr4_106155053_106158508_+	4.92126	0.000329226	4.4156	0.00167071	TRUE	circ_174895
THAP4_chr2_242572331_242573494_-	4.73119	0.000714853	5.28277	5.46458e-05	TRUE	circ_15958
TMEM135_chr11_86778735_86802437_+	6.29926	5.97435e-07	5.86164	4.04478e-06	TRUE	circ_106970
TMEM56_chr1_95609446_95616975_+	-4.62313	0.0013903	-5.05637	0.000385808	FALSE	circ_83763
TNFRSF19_chr13_24164288_24200931_+	-6.26595	1.11185e-06	-6.69566	1.53338e-07	TRUE	circ_112534
TNK2_chr3_195605123_195615477_-	6.26479	7.35269e-07	6.29154	4.44671e-07	TRUE	circ_124995
TNKS2_chr10_93579026_93602148_+	-5.04133	0.000296669	-5.47292	6.89421e-05	FALSE	circ_82703
TOP1_chr20_39721111_39729993_+	5.22257	0.000123157	5.00324	0.000178517	TRUE	circ_54059
TRAF3_chr14_103296670_103369766_+	4.71178	0.000802028	4.70595	0.000626039	TRUE	circ_102821
TTBK2_chr15_43120125_43132631_-	-4.84728	0.000608919	-5.2796	0.000153297	TRUE	circ_165498
TTC13_chr1_231090078_231097049_-	-5.49029	3.88968e-05	-5.92548	7.23521e-06	TRUE	circ_76684
TTC6_chr14_38149355_38170731_+	5.43681	3.68716e-05	4.63221	0.000770314	FALSE	circ_68692
TTN-AS1_chr2_179400458_179407088_+	5.55081	2.2506e-05	5.4967	2.16975e-05	FALSE	circ_146798
UBAP2_chr9_33948371_33953472_-	-5.66638	1.81996e-05	-6.1036	3.12684e-06	TRUE	circ_135796
UBAP2_chr9_33948371_33956144_-	-6.15778	1.52977e-06	-1.09618	0.0294418	TRUE	circ_103307
UBAP2_chr9_33953282_33996331_-	-5.73027	1.40352e-05	-6.16459	2.37326e-06	TRUE	circ_92394
UBAP2_chr9_33960823_33973235_-	-6.65469	1.32006e-07	-1.42491	0.0022439	TRUE	--
UBE2K_chr4_39739039_39779430_+	5.51763	2.5337e-05	5.53757	1.85288e-05	TRUE	circ_58092
UBE3A_chr15_25650607_25660989_-	6.58286	1.31963e-07	6.71105	5.44025e-08	TRUE	--
UBQLN1_chr9_86293355_86297981_-	-4.74339	0.00089531	-5.17571	0.000236039	TRUE	circ_31770
UNC13B_chr9_35228011_35243361_+	5.72175	9.88454e-06	5.1872	8.81039e-05	TRUE	--
USP3_chr15_63821212_63855207_+	-5.0541	0.000285167	-5.48431	6.63244e-05	TRUE	circ_110895
UXS1_chr2_106739425_106782539_-	5.88256	4.55062e-06	6.13091	1.01625e-06	TRUE	circ_141428
UXS1_chr2_106761645_106782539_-	6.11966	1.41097e-06	6.77916	3.43006e-08	TRUE	circ_131615
VAPA_chr18_9931806_9937063_+	-4.84467	0.000602235	-5.27836	0.000150731	TRUE	circ_107052
VPS37A_chr8_17123415_17143936_+	1.33906	0.0136937	1.77736	0.000240883	TRUE	circ_136475
VPS37A_chr8_17125766_17143936_+	5.40677	4.24223e-05	5.0066	0.000186737	TRUE	circ_72500
VRK2_chr2_58311223_58316858_+	5.90394	4.19622e-06	7.10116	5.66194e-09	FALSE	circ_118298
VWA8_chr13_42335263_42407667_-	4.98901	0.000278423	5.36956	3.83757e-05	TRUE	circ_139960
VWA8_chr13_42385360_42407667_-	5.11171	0.000153734	5.56632	1.51992e-05	TRUE	circ_135581
WDR20_chr14_102661274_102676199_+	5.75521	8.31167e-06	5.82623	4.41335e-06	TRUE	circ_127298
WDR37_chr10_1118055_1142186_+	6.71555	7.30143e-07	7.38382	1.24072e-09	TRUE	circ_18602
WDR37_chr10_1125950_1126416_+	-5.1352	0.000192671	-5.56588	4.28102e-05	TRUE	circ_125046
WDR41_chr5_76745584_76759051_-	5.10633	0.000178833	5.19204	8.09171e-05	TRUE	circ_59455
WDR41_chr5_76745584_76760634_-	1.71893	9.31245e-05	2.14195	5.98057e-08	TRUE	circ_44939
XPO6_chr16_28177828_28181230_-	-4.94755	0.000420185	-5.37949	0.000101405	TRUE	circ_59925
XRN2_chr20_21306916_21349228_+	5.66623	1.3681e-05	4.55669	0.00105877	TRUE	circ_128955
YWHAE_chr17_1264385_1265302_-	-4.85083	0.000591056	-5.28276	0.00014849	TRUE	circ_103952
ZBTB16_chr11_113933932_114057760_+	4.91324	0.000341982	5.29398	5.2288e-05	TRUE	circ_126757
ZCCHC11_chr1_52981562_52992045_-	4.78784	0.000582866	5.4967	2.16975e-05	TRUE	circ_55846
ZCCHC6_chr9_88920106_88924932_-	4.86105	0.00043199	4.64173	0.000748194	FALSE	circ_65509
ZGRF1_chr4_113483526_113506881_-	-5.27763	0.00010128	-5.71313	2.07036e-05	FALSE	circ_54148
ZMIZ1_chr10_80878671_80976031_+	4.4899	0.00174308	5.33125	4.30932e-05	TRUE	circ_79167
ZMYM4_chr1_35824525_35827390_+	-5.89666	6.28856e-06	-6.3289	9.96799e-07	TRUE	circ_128127
ZNF148_chr3_124996569_125050082_-	1.49931	0.00223483	1.8295	5.40101e-05	TRUE	circ_47613
ZNF148_chr3_125032151_125050082_-	1.14086	0.00344115	2.12846	8.62856e-11	TRUE	circ_136632
ZNF525_chr19_53883974_53887309_+	-5.35448	7.2443e-05	-5.78859	1.43753e-05	FALSE	--
ZNF800_chr7_127013395_127017383_-	5.30647	6.50701e-05	5.36705	3.78007e-05	TRUE	circ_108078
ZSWIM6_chr5_60768507_60790237_+	5.05321	0.00023264	4.33016	0.00222716	TRUE	circ_29781
