# Supplementary material for: HNRNPM controls circRNA biogenesis and splicing fidelity to sustain cancer cell fitness
Source: eLife journal article supplement (doi:10.7554/elife.59654), 2021-06-02

**A**

### Linear Events

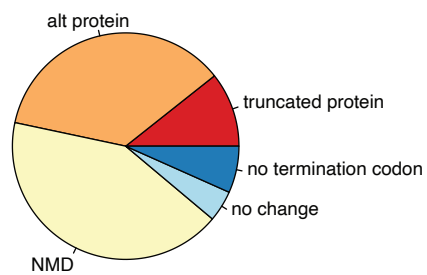**B**

Expanded  
in Figure 6E and 6F

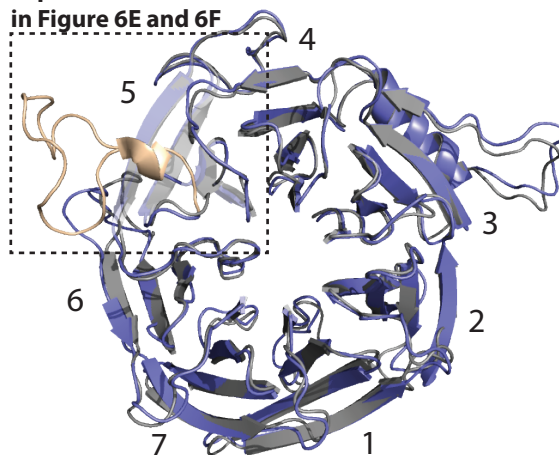

EED major isoform

EED mis-spliced isoform

HNRNPM<sup>lo</sup> peptide inclusion

**C**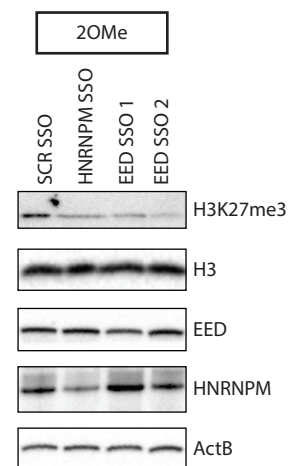

Supplement: supp [file elife-59654-supp-v1.zip]
