# Supplementary material for: HNRNPM controls circRNA biogenesis and splicing fidelity to sustain cancer cell fitness
Source: eLife journal article supplement (doi:10.7554/elife.59654), 2021-06-02

## A Stratification based on circ RNA expression

Tumor promoting  
Low group : High group Hazard ratio < 1

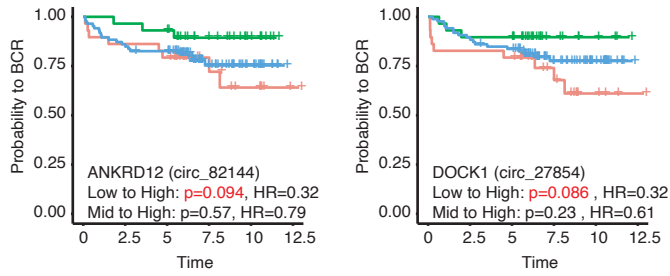

Patients expressing indicated circRNA (Chen 2019 dataset)

+high (> 80th percentile)  
+low (< 20th percentile)  
+Mid (20th to 80th percentile)

Tumor inhibitory  
(Low group:High group Hazard ratio > 1)

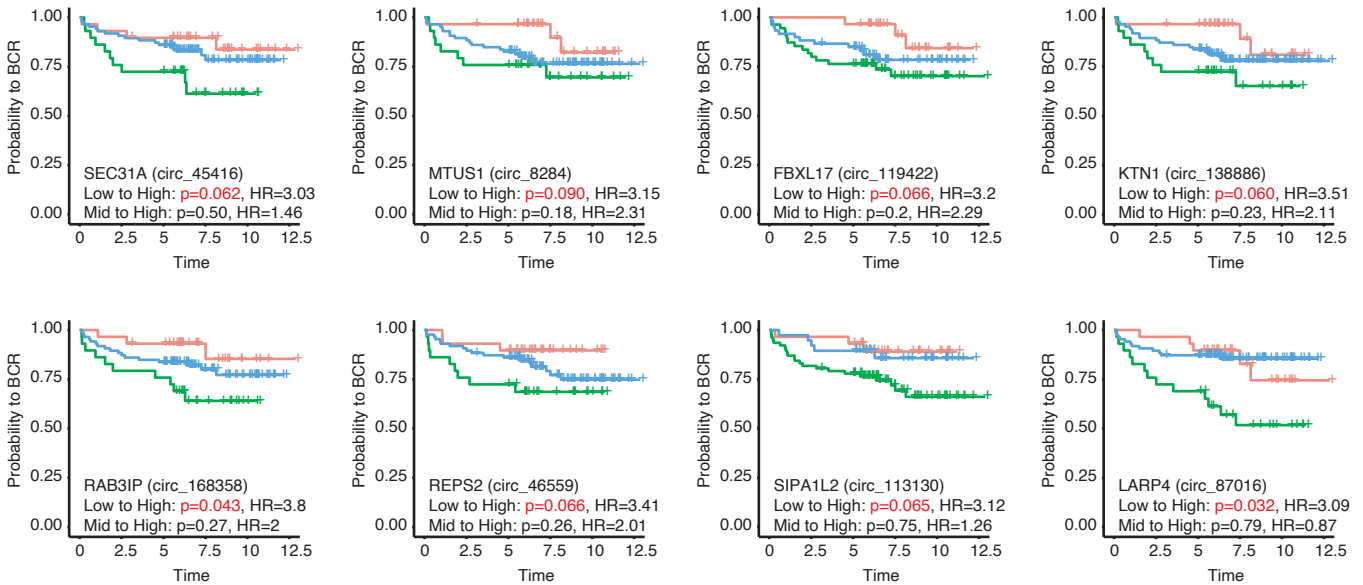

## B Stratification based on gene expression

Corresponding transcripts of Tumor promoting circRNAs

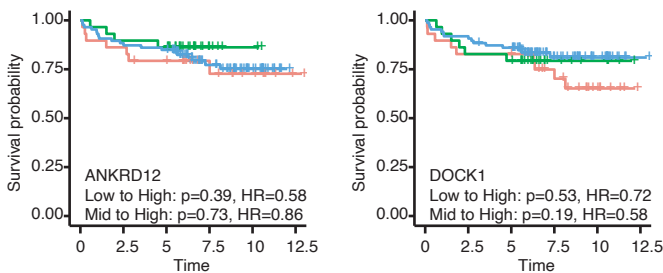

Patients expressing indicated transcript (Chen 2019 dataset)

+high (> 80th percentile)  
+low (< 20th percentile)  
+Mid (20th to 80th percentile)

Corresponding transcripts of Tumor inhibitory circRNAs

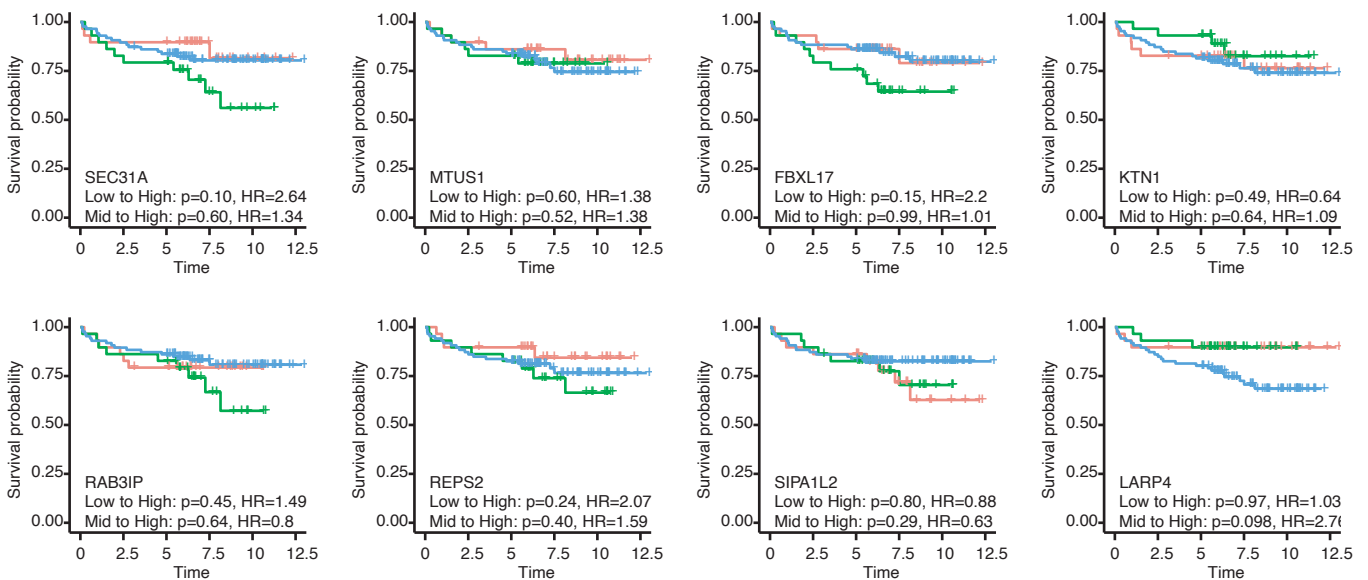

Supplement: supp [file elife-59654-supp-v1.zip]
