# Supplementary material for: HNRNPM controls circRNA biogenesis and splicing fidelity to sustain cancer cell fitness
Source: eLife. 2021 Jun 2;10:e59654. doi: 10.7554/eLife.59654 (PMC8346284; doi:10.7554/eLife.59654)
Supplement: Supplementary file 1. [file elife-59654-supp1.xlsx]

## Sheet: Suppl. File 1
Supplementary File 1: List of Hairpins and Targets used in pooled shRNA screens
PLKO.1 ID	Sequences	Target
TRCN0000148178	GAAGAATCTAAGAGAGCCTAT	ALKBH8, LOC646804
TRCN0000063714	GAAGAAGATGATGATGATGAT	ANKRD40, HMGB1, LOC389168, PRDM2, SET
TRCN0000144584	GAGGAAATCGTAACCAAAGAA	ARL6IP4
TRCN0000142167	GAGGTTCTTCTAGCTCCTCTT	ARL6IP4
TRCN0000142241	GAGGTCCTAGAGGAAATCGTA	ARL6IP4
TRCN0000143679	GAGAAAGAAGAAGAGCAGGAA	ARL6IP4
TRCN0000142310	GAAGCACAGCAGAACATCATC	ARL6IP4
TRCN0000142125	GAAGAAGAAGGGCAAGGAGAA	ARL6IP4
TRCN0000141661	CCAAGAGAGAAGCAAGCAGAA	ARL6IP4
TRCN0000122065	CAAGAGGAGGAAGAAGAAGAA	ARL6IP4
TRCN0000141804	GAACTGAAGAAGAAGGGCAAG	ARL6IP4
TRCN0000142650	GAAGTACAAGGACAAGAGGAG	ARL6IP4
TRCN0000141779	GACAAGAGGAGGAAGAAGAAG	ARL6IP4
TRCN0000145134	GAAGAAGAAGAAGAAGAGGAA	ARL6IP4
TRCN0000034709	GCCGAAGTGATCTCTACTCAA	CCBL2, LOC100131735, RBMX
TRCN0000072673	GCCTATGTAAGGAAAGTGCTA	CCBL2, LOC100131735, RBMX
TRCN0000034712	CCACCAAACCATCATTTGAAA	CCBL2, LOC100131735, RBMX, RBMXP4
TRCN0000034710	CCTCTCGTAGAGATGTTTATT	CCBL2, RBMX
TRCN0000034713	GCTCTTCATTGGTGGGCTTAA	CCBL2, RBMX
TRCN0000034711	TGACTATCCATCAAGAGGCTA	CCBL2, RBMXP4
TRCN0000000754	TGGTTCATTAAGTACATAGCT	CLK1
TRCN0000000756	GCTCGCTCAGAAATACAAGTT	CLK1
TRCN0000000757	GATATGTTTCAAGAGCCTGTA	CLK1
TRCN0000000758	GATATGCAAGTCTGTGAATTT	CLK1
TRCN0000197103	GACTACACAGAGGCGTATAAT	CLK1
TRCN0000195416	CGATCGATTAGACTGGGATGA	CLK1
TRCN0000196712	GTTTGGGTAATTTGGTTCATT	CLK1
TRCN0000000755	GCTGCAAATACAATCACTCTA	CLK1, PPIL3
TRCN0000000750	CTTCCTCCTGGCTCTCTATAT	CLK2
TRCN0000000751	GAGATCAACGTGCTAGAGAAA	CLK2
TRCN0000000752	GAAAGCATAAGCGACGAAGAA	CLK2
TRCN0000000753	GAAGCAGTTATGATGATCGTT	CLK2
TRCN0000229970	GCTACAGACGCAACGATTATA	CLK2
TRCN0000355628	GTCCGTTCTCGAAGCAGTTAT	CLK2
TRCN0000021590	GCCCTGAAGATCATTAAGAAT	CLK2, CLK2P
TRCN0000021591	GCTGTCAAGTTCCTCCATGAT	CLK2, CLK2P
TRCN0000021592	CCTTGTGATGTGTGGAGTATA	CLK2, CLK2P
TRCN0000021593	GCTGACACATACAGACCTCAA	CLK2, CLK2P
TRCN0000010543	GTGGAGTATAGGCTGCATCAT	CLK2, CLK2P
TRCN0000021589	CCTGCGTTGTACATAATGCTA	CLK2P
TRCN0000000745	GCTAGAAATCAACGTGCTCAA	CLK3
TRCN0000000746	CCGTACCAGGAAGCAGAAATA	CLK3
TRCN0000000747	CCTGTGTGTCTTGATGTCTGA	CLK3
TRCN0000000748	ACTACTATGGACCTTCACGTT	CLK3
TRCN0000000749	CATTGGCTGCATTCTCTTTGA	CLK3
TRCN0000001350	GTGTCCAGTGATAAATGTGAT	CLK4
TRCN0000001351	GCATCCTTTCTTTGACTTATT	CLK4
TRCN0000001352	CTGGCAATGATGGAACGAATA	CLK4
TRCN0000001353	CGATGTGTCCAGATGCTAGAA	CLK4
TRCN0000010605	TGACGAATACAGGAATGACTA	CLK4
TRCN0000196441	GAATCAGTGGTCTTACTATAT	CLK4
TRCN0000197156	GCACACAAGAGAACAGGCATT	CLK4
TRCN0000194961	CGTTCAGAAATCCAAGTATTA	CLK4
TRCN0000265730	CCTTGAATGAGCGAGATTATC	CLK4
TRCN0000265717	ACAGAGCTCCCGAGGTCATTT	CLK4
TRCN0000083623	CCTGACCTGATGTCCATTCAT	COL2A1, HNRNPM
TRCN0000220031	CTGATTGCAAATAGGCATTTA	ESRP1
TRCN0000146588	CCGGTATATTGAGGTTTACAA	ESRP1
TRCN0000149820	CTTGCAGCAAGATGGAACTTA	ESRP1
TRCN0000147725	GCATAAAGACTTGTTGGGTAA	ESRP1
TRCN0000059643	GTGACAATAAACTGGTGACAA	FABP1, PRDM10
TRCN0000059646	CTGGGTCCAAAGTGATCCAAA	FABP1, PRDM10
TRCN0000059647	GAGAAAGTCAAGACAGTGGTT	FABP1, PRDM10
TRCN0000059645	CAAGTCTGTGACCGAACTCAA	FABP1, PRDM10
TRCN0000151121	GATCCGAATATCTTTGCCTAT	FAM75C1, METTL6
TRCN0000152034	CCAAACTTTGGTGTCTGATTT	FAM75C1, METTL6
TRCN0000152989	GACCAAACTTTGGTGTCTGAT	FAM75C1, METTL6
TRCN0000239355	AGATCCACATCAAGCCCAAGT	FBLL1
TRCN0000239353	CTCCCATGTCTCCGACATCAT	FBLL1
TRCN0000239356	TCTGGTCAACGTGGCCAAGAA	FBLL1
TRCN0000239354	CCACTTTCTCATCTCCATCAA	FBLL1
TRCN0000239352	TTGCAGCAGGAGAACTTGAAG	FBLL1
TRCN0000144648	GAAAGGTGTAAGAGACTCTTT	FBXO10, SHB, TOMM5
TRCN0000141612	CACGATATGAAGAGCCTGGTT	FBXO10, SHB, TOMM5
TRCN0000142024	GACTCCTCTCTGCAAGTGAAT	FBXO10, SHB, TOMM5
TRCN0000001132	CGGACTATGTAATTGTAACTA	FUS
TRCN0000001133	GCCTGGGTGAGAATGTTACAA	FUS
TRCN0000001134	CGTGGTGGCTTCAATAAATTT	FUS
TRCN0000001135	ACAGGATAATTCAGACAACAA	FUS
TRCN0000039824	GCTGATTACTTCAAGCAGATT	FUS
TRCN0000039825	CCAGAGCAGCTATTCTTCTTA	FUS
TRCN0000039826	CCTGGGTGAGAATGTTACAAT	FUS
TRCN0000039827	CGAACAGGATAATTCAGACAA	FUS
TRCN0000010598	TCGCAGGGAGAGGCCGTATTA	FUS
TRCN0000010450	ATGAATGCAACCAGTGTAAGG	FUS
TRCN0000010451	ATTCCTGATCACCCAAGGGTT	FUS
TRCN0000074833	CCCAGGTAAATTCCAATTATA	FUSIP1, LOC642558
TRCN0000074835	GCTATGATGATTATGACAGAT	FUSIP1, LOC642558, LOC653884
TRCN0000074836	CCAGTACAGTTCTGCTTACTA	FUSIP1, LOC642558, LOC653884
TRCN0000074837	GCCGAAGTTATGAAAGGAGGA	FUSIP1, LOC642558, LOC653884
TRCN0000074834	CGGCGTGAATTTGGTCGTTAT	FUSIP1, LOC642558, LOC653884
TRCN0000017233	CGGCTTCGTGTATTTCCAGAA	HNRNPA0
TRCN0000017234	GTCGCAGTAATAGTGGACCTT	HNRNPA0
TRCN0000017235	GCCAAGGTTAAGAAGCTCTTT	HNRNPA0
TRCN0000017237	CCCGTTGCTTTGGCTTCGTGA	HNRNPA0
TRCN0000017236	CGACAAGCAGTCCGGCAAGAA	HNRNPA0
TRCN0000235095	ATATTTGTTGGTGGCATTAAA	HNRNPA1
TRCN0000235097	CAACAATCAGTCTTCAAATTT	HNRNPA1
TRCN0000235098	ACCCATGAAGGGAGGAAATTT	HNRNPA1
TRCN0000055266	GCAATTACAACAATCAGTCTT	HNRNPA1, HNRNPA1P2, HNRPA1L-2, LOC100132528, LOC100133362, LOC100133372, LOC391670, LOC402112, LOC440125, LOC642817, LOC643033, LOC644037, LOC645001, LOC728170, LOC728732, RP11-78J21.1
TRCN0000006586	AGATATTTGTTGGTGGCATTA	HNRNPA1, HNRPA1L-2, HNRPA1P5, LOC100132528, LOC120364, LOC391670, LOC440396, LOC643033, LOC644037, LOC645001, LOC645691, LOC728170, LOC729366, RP11-78J21.1, VKORC1L1
TRCN0000006585	TGTGGTAATGAGAGATCCAAA	HNRNPA1, HNRPA1L-2, LOC100128701, LOC100132528, LOC120364, LOC402112, LOC440396, LOC643033, LOC645001, LOC645691, LOC728170, LOC729366, RP11-78J21.1
TRCN0000006584	CGAAGTGGTTCTGGAAACTTT	HNRNPA1, HNRPA1L-2, LOC100128836, LOC120364, LOC402112, LOC440125, LOC644037, LOC645691, LOC728643, LOC729102, LOC730246
TRCN0000006583	GCCACAACTGTGAAGTTAGAA	HNRNPA1, HNRPA1L-2, LOC645691, RP11-78J21.1
TRCN0000006582	GCCAGGTTCTATTTGGAATTT	HNRNPA1, HNRPA1P5, LOC644037, LOC645691
TRCN0000074518	CCCTGGTTGTAAAGAGTAAAT	HNRNPAB
TRCN0000074519	TCAGAATAACTACAAGCCATA	HNRNPAB
TRCN0000074520	TGGAAGCAAGTGTGAGATCAA	HNRNPAB
TRCN0000074521	TGAGGCCATTGAATTGCCAAT	HNRNPAB
TRCN0000074522	TGAATTGCCAATGGATCCAAA	HNRNPAB
TRCN0000006644	GCGCTTGTCTAAGATCAAATT	HNRNPC
TRCN0000006645	GCCTTCGTTCAGTATGTTAAT	HNRNPC
TRCN0000011038	GCGGAGATGTACGGGTCAGTA	HNRNPC
TRCN0000006646	CTGGATGATGATGATAATGAA	HNRNPC, LOC440563
TRCN0000006647	CTTGTGGTCAAGAAATCTGAT	HNRNPC, LOC646956, LOC729954
TRCN0000001292	GCGGCTAGTTCAGAGAGATTT	HNRNPD
TRCN0000001293	AGAGTGGTTATGGGAAGGTAT	HNRNPD
TRCN0000001294	AGTAAGAACGAGGAGGATGAA	HNRNPD
TRCN0000001295	AGGATATGACTACACTGGTTA	HNRNPD
TRCN0000001296	TCGAAGGAACAATATCAGCAA	HNRNPD
TRCN0000293284	ACTATGGATATGGTGATTATA	HNRNPD
TRCN0000001233	TGGCACAGATTACTCAGCAAA	HNRNPF
TRCN0000001234	CGAGAACGACATTTACAACTT	HNRNPF
TRCN0000001235	GAGGTACATTGGCATCGTGAA	HNRNPF
TRCN0000001236	GAAGGCTCTAGGGAAACACAA	HNRNPF
TRCN0000001237	CGCAGGTGTCCATTTCATCTA	HNRNPF
TRCN0000230710	AGCGACCGAGAACGACATTTA	HNRNPF
TRCN0000230711	GCAATTAAGAGCAGTTATAAT	HNRNPF
TRCN0000218480	CGGCAATATGCAGCACAGATA	HNRNPF
TRCN0000230708	TGGATCAGAAGATGATGTAAA	HNRNPF
TRCN0000074593	GCATGTTGAAAGACATGCTTT	HNRNPH1
TRCN0000074594	GCTCTACTTTCCAGAGCACAA	HNRNPH1
TRCN0000074596	CCTGTGAGAGTACACATTGAA	HNRNPH1
TRCN0000074597	GAAGTCAAATTGGCCCTGAAA	HNRNPH1
TRCN0000236086	TTGCCCTTTGCCACGTTAAAT	HNRNPH1
TRCN0000236088	CAAGTCAAACAACGTTGAAAT	HNRNPH1
TRCN0000236085	AGCTGAAGTTAGAACTCATTA	HNRNPH1
TRCN0000257227	GATCCACCACGAAAGCTTATG	HNRNPH1
TRCN0000074595	CTCATTATGATCCACCACGAA	HNRNPH1, TRAM2
TRCN0000075093	GCTTACTGTAAAGTGGAAGTT	HNRNPH2
TRCN0000075094	CCCATGAGAGTACATATTGAA	HNRNPH2
TRCN0000075095	GCCTTAAAGAAACACAAGGAA	HNRNPH2
TRCN0000075096	CCATGAGAGTACATATTGAAA	HNRNPH2
TRCN0000075097	CCAAGTGGTGAAGCATTTGTT	HNRNPH2
TRCN0000062456	TGATGTTTGATGACCGTCGCG	HNRNPK
TRCN0000062457	ATGATGTTTGATGACCGTCGC	HNRNPK
TRCN0000295992	TGATCTTGGTGGACCTATTAT	HNRNPK
TRCN0000295993	AGATTTGGCTGGATCTATTAT	HNRNPK
TRCN0000296044	CGTTATTGTTGGTGGTTTAAA	HNRNPK
TRCN0000062454	TGCCAGTGTTTCAGTCCCAGA	HNRNPK, LOC389322, LOC644063
TRCN0000062455	GCCAGTGTTTCAGTCCCAGAC	HNRNPK, LOC389322, LOC644063
TRCN0000062453	CTCTGTTGTATGTTGGATTAT	HNRNPK, LOC644063
TRCN0000017247	CCATCAGCTATGTGGTGGTAA	HNRNPL
TRCN0000330565	TAGAGGCTTACTTAACCTTAA	HNRNPL
TRCN0000017244	CCACGGATGTTCTTTACACTA	HNRNPL, LOC644390
TRCN0000017245	CCTCAACAACAACTTCATGTT	HNRNPL, LOC644390
TRCN0000017246	GCCGACAACCAAATATACATT	HNRNPL, LOC644390
TRCN0000017243	CGCTTGAATGTGTTCAAGAAT	HNRNPL, LOC644390
TRCN0000001243	AGAGCCTTCATTACAAACATA	HNRNPM
TRCN0000001244	ACAAGCATAGTCTGAGCGGAA	HNRNPM
TRCN0000001245	GAGAGGAGAGATCATTGCAAA	HNRNPM
TRCN0000001246	CTGTGCAAGCTATATCTATGT	HNRNPM
TRCN0000001247	GATGGCTACGACTGGTGGGAT	HNRNPM
TRCN0000350395	CGAATTGATAGAAACGCTTAA	HNRNPM
TRCN0000001238	CTCTTGGACATTATTGGGCTT	HNRNPR
TRCN0000001239	CCAAGGGATTTATATGAGGAT	HNRNPR
TRCN0000001240	GAACACTACAAGACACTGATA	HNRNPR
TRCN0000001241	GACGTTATTCTCTATCATCAA	HNRNPR
TRCN0000001242	GTAGCTTATGTCGATCTTGAT	HNRNPR
TRCN0000235504	GAGGGTTTGGTGGACGTTATT	HNRNPR
TRCN0000235502	ACGGCTATGAAGATTACTATG	HNRNPR
TRCN0000235505	GCTTGAGAGAACTGGTTATAC	HNRNPR
TRCN0000235506	TTATCGTTTCAGGCTTCATTT	HNRNPR
TRCN0000001297	CGATAAGAGAATGTGTCAGTA	HNRNPU
TRCN0000001298	CAGTGCTTCTTCCCTTACAAT	HNRNPU
TRCN0000001299	GCAACTGTGAGACTGAAGATT	HNRNPU
TRCN0000001300	AGGGAACTACAACCAGAACTT	HNRNPU
TRCN0000001301	GAACAAGTATAGCAGAGCCAA	HNRNPU
TRCN0000320585	TGCCCGAAAGAAGCGAAATTT	HNRNPU
TRCN0000320516	AGATCATGGCCGTGGATATTT	HNRNPU
TRCN0000074728	GCTTCTGTGTTCAGTTGAATT	HNRNPUL1
TRCN0000074729	CCCGCAAGAAACGCAACTATA	HNRNPUL1
TRCN0000074730	CCGGGATAACAACAACTCCAA	HNRNPUL1
TRCN0000074731	CCGTGTATGCTTCGAGATGAA	HNRNPUL1
TRCN0000074732	GCCCGCAAGAAACGCAACTAT	HNRNPUL1
TRCN0000344784	CCTCATGCAGTTGGTTGTAAA	HNRNPUL1
TRCN0000074553	CCTCAAATAAATGCTTCCTTA	HNRPDL
TRCN0000074554	CGGATACTTCTGAAGAACAAA	HNRPDL
TRCN0000074555	CCATCAAATTGGTTCTGGGAA	HNRPDL
TRCN0000074556	CGGATATGATTATACTGGGTA	HNRPDL
TRCN0000074557	CGTCACTATGGAGGATATGAA	HNRPDL
TRCN0000236576	TGGCTATGGCGGATATGATTA	HNRPDL
TRCN0000236574	ACAATTACCAGCCATACTAAA	HNRPDL
TRCN0000236572	AGTTGTAGACTGCACAATTAA	HNRPDL
TRCN0000236575	CAGAGTACTTGTCTCGATTTG	HNRPDL
TRCN0000075098	GAGAAGAGCATGTTAGAATTT	HNRPLL
TRCN0000075099	GCACTGAATCACTATCAGATA	HNRPLL
TRCN0000075100	GCAAAGTGCAACGTATTGTTA	HNRPLL
TRCN0000075101	CGACAGGCTCTAGTGGAATTT	HNRPLL
TRCN0000075102	CCTTCTTCGTTTAGACATGAT	HNRPLL
TRCN0000035929	CCGGCAGTACAAAGACTACAA	LOC100128760, PRMT1
TRCN0000072674	CGGTGGATATTCCATGAATTT	LOC100131735, RBMX
TRCN0000072676	CTTGAAGCAGTATTTGGCAAA	LOC100131735, RBMX
TRCN0000140699	GCCTGCTAACACAACATCCAT	LOC100132176, LOC440839, LOC642313, LOC642617, LOC727836, LOC728601, SFRS2IP, TIGD1
TRCN0000035957	CGACTGGATGTGCACTCATTT	LOC441487, METTL1
TRCN0000035958	GATGACCCAAAGGATAAGAAA	LOC441487, METTL1
TRCN0000001156	CCGACGTTTAGCCAGACCATT	LOC441722, U2AF1
TRCN0000001157	CGTCGCAAGAAGCATAGATCA	LOC441722, U2AF1
TRCN0000006621	GCACAGAAATAAATGGCAGAA	LOC644422, SFRS6
TRCN0000006623	CGTACAGAATACAGGCTTATT	LOC644422, SFRS6
TRCN0000006624	GCTCCCATTCACATTCTCGAA	LOC644422, SFRS6
TRCN0000001190	GCTGTGGGCATTTCCTCTATT	LUC7L2
TRCN0000001191	CGGTCCTATGAGAGTGCTAAT	LUC7L2
TRCN0000001192	GCAGAGGAAGTTTATCGGAAT	LUC7L2
TRCN0000001193	GTAATGGATGAAGTAGAGAAA	LUC7L2
TRCN0000001194	GAACGGCTGAAACGAAGAGAA	LUC7L2
TRCN0000196311	GAAGAATTAAAGAGAGTCGTA	LUC7L2
TRCN0000195117	CTCTATTCTGTTACGTCATTA	LUC7L2
TRCN0000039641	CAGGAACTATGACCTCGACTA	MRTL, MYC
TRCN0000010389	AACTATGACCTCGACTACGAC	MRTL, MYC
TRCN0000145489	GCACATCTAACATCTACACTT	NSUN5, NSUN5B
TRCN0000142689	CAAGAGACAAGGTTTCTCCTA	NSUN5, NSUN5B, NSUN5C
TRCN0000139265	CAGGCAATAAGACCAGTCACT	NSUN5, NSUN5B, NSUN5C
TRCN0000139509	CCAAGGGAAGATCTTTGCCTT	NSUN5, NSUN5B, NSUN5C
TRCN0000139787	CGTTGCTGTAATTGAACGGGT	NSUN5, NSUN5B, NSUN5C
TRCN0000139053	CCAGGAGGAGAATGAAGACAT	NSUN5B, NSUN5C
TRCN0000139274	CCAGGCAATAAAGACCAGTCA	NSUN5C
TRCN0000144522	CAAAGAGAAAGAAGAGAGCAA	NSUN5C
TRCN0000074668	CCCATGATCCAACTGTGTAAT	PCBP1
TRCN0000074669	CGGGTGTAAGATCAAAGAGAT	PCBP1
TRCN0000074670	GCCTACTCGATTCAAGGACAA	PCBP1
TRCN0000074671	GCCATCTTTAAGGCTTTCGCT	PCBP1
TRCN0000074672	TCGGCTTCTTATGCACGGAAA	PCBP1
TRCN0000303584	TAGTCTGGCCCAGTATCTAAT	PCBP1
TRCN0000074878	GCCTACTACTACCAGCAGAAA	PHF5A
TRCN0000074879	CCATCGGAAGACTGTGTGAAA	PHF5A
TRCN0000074880	GCGCATATGTGATGAGTGTAA	PHF5A
TRCN0000074881	GACCTCTTCTATGAACGCAAA	PHF5A
TRCN0000074882	TGTGTGATTTGTGACTCCTAT	PHF5A
TRCN0000015176	GCTATGAGTATGTGGATGGAA	PRDM7, PRDM9
TRCN0000075153	AGACCAGAGATGGGTGGTATA	PRPF40B
TRCN0000075154	GCAGGCATTCAATGCCTACAA	PRPF40B
TRCN0000075155	CTGGACTTATTCAAGTTCTAT	PRPF40B
TRCN0000075156	TCTGGACTTATTCAAGTTCTA	PRPF40B
TRCN0000075157	CTAGAGGTTCTAGTCAAACAA	PRPF40B
TRCN0000075108	CCCAACTTGTACCGCTACATA	PRPF8
TRCN0000075109	GCCCTGTATGTGTTACGTGAA	PRPF8
TRCN0000075110	CCCAACATGAAATATGAGCTA	PRPF8
TRCN0000075111	CGAGACATCAACCTACAGGAT	PRPF8
TRCN0000075112	CGCCTCATGAAACATGATGTT	PRPF8
TRCN0000001062	CTCAACGTCAAGTACAACAAT	PTBP1
TRCN0000001063	AGCAAACGGAAATGACAGCAA	PTBP1
TRCN0000010584	CGTCGTCAAAGGATTCAAGTT	PTBP1
TRCN0000010585	CCAGCCCATCTACATCCAGTT	PTBP1
TRCN0000231421	ACGCGGAGAGAACCGATTAAA	PTBP1
TRCN0000231417	TGTCACTAACGGACCGTTTAT	PTBP1
TRCN0000231420	GCGTGAAGATCCTGTTCAATA	PTBP1
TRCN0000231418	GCTTCTGCAGCAAACGGAAAT	PTBP1
TRCN0000127544	CCTCTGAGTAAAGATCCCAAT	RBM35B
TRCN0000127635	CGACATGTTCTTCTCCTTCTA	RBM35B
TRCN0000128491	GCCTTAAAGATCCATTCTGAA	RBM35B
TRCN0000130676	CATTGAAGACATCCTGAGCTT	RBM35B
TRCN0000131004	CCTGAACTACACAGCCTACTA	RBM35B
TRCN0000074543	CCTCACTATGTTCTTTGAATA	RBM9
TRCN0000074544	CGGGTTCGTAACTTTCGAGAA	RBM9
TRCN0000074545	GCATCCAGCTTTCAAGCAGAT	RBM9
TRCN0000074546	CATATGCAAATGGTTGGAAAT	RBM9
TRCN0000074547	CCATATGCAAATGGTTGGAAA	RBM9
TRCN0000306861	TTGGCGCTGTGGCGAGTTTAT	RBM9
TRCN0000294132	AGACATTAGGAGCCGATAAAT	RBM9
TRCN0000294044	GTATATGGTCCGGAGTTATAT	RBM9
TRCN0000294042	GCCGCTTACAGTGACGGTTAT	RBM9
TRCN0000157175	GATGGTGGATACACTCCTGAT	RBMY1A1, RBMY1A3P, RBMY1B, RBMY1D, RBMY1E, RBMY1F, RBMY1J
TRCN0000147892	GATACAGAAATCGTCGAAGTT	RBMY1A1, RBMY1B, RBMY1D, RBMY1E
TRCN0000152933	GAGGATACAGAAATCGTCGAA	RBMY1A1, RBMY1B, RBMY1D, RBMY1E
TRCN0000062783	CCTGCATATTACTGAAAGAAA	RBMY1A1, RBMY1B, RBMY1D, RBMY1E, RBMY1F, RBMY1J
TRCN0000062784	CCGTGATAATGGTCATTCTAA	RBMY1A1, RBMY1B, RBMY1D, RBMY1E, RBMY1F, RBMY1J
TRCN0000062785	GCTCCACCACATAGAGACTAT	RBMY1A1, RBMY1B, RBMY1D, RBMY1E, RBMY1F, RBMY1J
TRCN0000062786	CGCATGTCAACAAGACATGAT	RBMY1A1, RBMY1B, RBMY1D, RBMY1E, RBMY1F, RBMY1J
TRCN0000146399	CGACAATATCTTCCTGGAGAA	RBMY1A1, RBMY1B, RBMY1D, RBMY1E, RBMY1F, RBMY1J
TRCN0000148208	GCAACTAACGATGGAAATCAT	RBMY1A1, RBMY1B, RBMY1D, RBMY1E, RBMY1F, RBMY1J
TRCN0000148068	GAGAAGATGCTTAAAGCAGTA	RBMY1A1, RBMY1B, RBMY1D, RBMY1E, RBMY1F, RBMY1J
TRCN0000147304	GATACTAACTTCCTCCATGAA	RBMY1A1, RBMY1B, RBMY1D, RBMY1E, RBMY1F, RBMY1J
TRCN0000147803	GTAGATACTAACTTCCTCCAT	RBMY1A1, RBMY1B, RBMY1D, RBMY1E, RBMY1F, RBMY1J
TRCN0000149586	CTCGTCGGGATGAAAGTTATT	RBMY1A1, RBMY1B, RBMY1D, RBMY1E, RBMY1F, RBMY1J
TRCN0000147681	GTCAACAAGACATGATGGTTA	RBMY1A1, RBMY1B, RBMY1D, RBMY1E, RBMY1F, RBMY1J
TRCN0000151325	GAGAGAGGTAGATACTAACTT	RBMY1A1, RBMY1B, RBMY1D, RBMY1E, RBMY1F, RBMY1J
TRCN0000151367	GACATGATGGTTATGCAACTA	RBMY1A1, RBMY1B, RBMY1D, RBMY1E, RBMY1F, RBMY1J
TRCN0000154817	GCATACCGTGATTATGGTCAT	RBMY1A1, RBMY1B, RBMY1D, RBMY1E, RBMY1F, RBMY1J
TRCN0000152906	GATCGCATGTCAACAAGACAT	RBMY1A1, RBMY1B, RBMY1D, RBMY1E, RBMY1F, RBMY1J
TRCN0000062787	GCAAATCCAGAGGCTTTGCAT	RBMY1A1, RBMY1B, RBMY1D, RBMY1E, RBMY1F, RBMY1J, RBMY2EP, RBMY2FP
TRCN0000150249	GAGATAGATATGGCAGAAGTT	RBMY1A1, RBMY1B, RBMY1D, RBMY1E, RBMY1F, RBMY1J, RBMY3AP
TRCN0000153196	CGAGATAGATATGGCAGAAGT	RBMY1A1, RBMY1B, RBMY1D, RBMY1E, RBMY1F, RBMY1J, RBMY3AP
TRCN0000149492	GCTAAGAATGCTGCGAAAGAT	RBMY1A1, RBMY1F, RBMY1J
TRCN0000154988	GATGCTAAGAATGCTGCGAAA	RBMY1A1, RBMY1F, RBMY1J
TRCN0000128437	GCAGACATTCAGATCAAGTAA	RSRC1
TRCN0000128605	CCTCGTTCACATTCTTATGAT	RSRC1
TRCN0000128586	GTCAGCAGTAACATTGGAAAT	RSRC1
TRCN0000128413	GATTTCATCTTCCGTATGGTA	RSRC1
TRCN0000130228	CGAGGGAAATCCTATAGAGTT	RSRC1
TRCN0000128011	GTCTCCGTTCTCATAGTCGTA	RSRC1
TRCN0000128628	CACTAGTGTTTCTTAGTGCAA	RSRC1
TRCN0000001069	GCGTTCTCTTCACTGGTTTAT	SF1
TRCN0000001070	CCACAAGATGAGTACCCAGAA	SF1
TRCN0000001071	CGTAGCATCGAGTGTCTTCTT	SF1
TRCN0000001072	GCTCGCTTAAATGGGACCCTT	SF1
TRCN0000001073	AGGATAAAGCACGGATGGATA	SF1
TRCN0000229969	CGGGAGTTGGCTCGCTTAAAT	SF1
TRCN0000257126	GGTTGCACTCAATCCGGATTT	SF1
TRCN0000229968	AGAACAAGAAAGAGCTTATAT	SF1
TRCN0000218954	CGGGATAAAGCACGGATGGAT	SF1
TRCN0000006597	GCTCTTACTCAGTTTGGGAAT	SF3A1
TRCN0000006598	GCAGGATAAGACGGAATGGAA	SF3A1
TRCN0000006599	CCTCTTCAACTACTTCACGAA	SF3A1
TRCN0000006600	CGTACTGACATCTTCGGTGTA	SF3A1
TRCN0000006601	CCACAGAAGAAGAAGCATCTT	SF3A1
TRCN0000000074	TGCTTTGATTTGGTGATGTAA	SF3B1
TRCN0000000075	AGAAGAAATTACCGACAGTTA	SF3B1
TRCN0000000076	CGCTATTGATTGATGAAGATT	SF3B1
TRCN0000000077	CAACTCCTTATGGTATCGAAT	SF3B1
TRCN0000000078	CTGGGCATACTCCTTCCTTAA	SF3B1
TRCN0000001093	GCAACCACGAAACCTGTAATA	SFRS1
TRCN0000001094	ACTGCCTACATCCGGGTTAAA	SFRS1
TRCN0000001095	GAAGCAGGTGATGTATGTTAT	SFRS1
TRCN0000001096	ACTTACCTCCAGACATCCGAA	SFRS1
TRCN0000010592	CAAGTTATGGAAGATCTCGAT	SFRS1
TRCN0000000125	CCTTATCTCTTGCCCTTATTT	SFRS11
TRCN0000000126	GTCCCTAATTTCTGCTGCTAT	SFRS11
TRCN0000000127	AGAACGATCAACAAGCAAGAA	SFRS11
TRCN0000000128	GAGCTTTGATAGTCGTACCAT	SFRS11
TRCN0000000129	AGCTTTGATAGTCGTACCATA	SFRS11
TRCN0000284895	TAAAGCTCCTGTTACTCATAT	SFRS11
TRCN0000314691	GGGAACTGGTGATTCACTAAG	SFRS11
TRCN0000272950	AGGTAATCCAGGTGACTAATG	SFRS11
TRCN0000272949	ATGGATATGAGTGACTGAATA	SFRS11
TRCN0000001307	CCATCATTCTTAGGCTCACTT	SFRS12
TRCN0000001308	GAAGAAGTAATGAAGCGAGTA	SFRS12
TRCN0000001309	CATGAGAAGGATCGAGACAAA	SFRS12
TRCN0000001310	GATGAAATTAGGAGAACGGTT	SFRS12
TRCN0000001311	CTCCAACAATGCAATAGTAAA	SFRS12
TRCN0000000079	CGATTGCTCCTGTGTAAAGAT	SFRS2
TRCN0000000080	TGGATTTGGATATTTGAGGTA	SFRS2
TRCN0000000081	AGTTGTGTAGCAGTTGAGTAA	SFRS2
TRCN0000000082	ACCACATAGTCCATCGAAGAA	SFRS2
TRCN0000000083	CAGTTGTGTAGCAGTTGAGTA	SFRS2
TRCN0000000084	TCTCCCGATTGCTCCTGTGTA	SFRS2
TRCN0000000085	GTCGTGCAGAAACAAATGGCT	SFRS2
TRCN0000000086	ATGTATCGGCAAGCAGTGTAA	SFRS2
TRCN0000000087	AGTCCATCGAAGAAGAGTCCT	SFRS2
TRCN0000000088	AGGCGCAGTTGTGTAGCAGTT	SFRS2
TRCN0000000089	CACATAGTCCATCGAAGAAGA	SFRS2
TRCN0000000090	CATAGTCCATCGAAGAAGAGT	SFRS2
TRCN0000000092	CGGGCCTTGCATATAAATAAC	SFRS2
TRCN0000000093	CCGATTGCTCCTGTGTAAAGA	SFRS2
TRCN0000000094	ACATAGTCCATCGAAGAAGAG	SFRS2
TRCN0000000095	TCGGCAAGCAGTGTAAACGGA	SFRS2
TRCN0000000096	GTATCGGCAAGCAGTGTAAAC	SFRS2
TRCN0000000097	CGGCAAGCAGTGTAAACGGAG	SFRS2
TRCN0000000098	GAGTGCTTGGCTGTTTCCTGT	SFRS2
TRCN0000000099	CCACATAGTCCATCGAAGAAG	SFRS2
TRCN0000000100	TAGTCCATCGAAGAAGAGTCC	SFRS2
TRCN0000000101	ATAGTCCATCGAAGAAGAGTC	SFRS2
TRCN0000000102	CCCGATTGCTCCTGTGTAAAG	SFRS2
TRCN0000000103	GATTGCTCCTGTGTAAAGATG	SFRS2
TRCN0000000104	TTTCTCCCGATTGCTCCTGTG	SFRS2
TRCN0000000105	ATCGGCAAGCAGTGTAAACGG	SFRS2
TRCN0000000106	GGCAAGCAGTGTAAACGGAGG	SFRS2
TRCN0000000107	TTGCTCCTGTGTAAAGATGCC	SFRS2
TRCN0000000108	ATTGCTCCTGTGTAAAGATGC	SFRS2
TRCN0000000109	TATCGGCAAGCAGTGTAAACG	SFRS2
TRCN0000010514	TAGGCGCAGTTGTGTAGCAGT	SFRS2
TRCN0000010515	GGCGCAGTTGTGTAGCAGTTG	SFRS2
TRCN0000001223	CACTGTTACCATTGTTCTTAT	SFRS3
TRCN0000001224	CGAGAGCTAGATGGAAGAACA	SFRS3
TRCN0000001225	ACAATGGCAACAAGACGGAAT	SFRS3
TRCN0000001226	GACGGAATTGGAACGGGCTTT	SFRS3
TRCN0000001227	TGGAACTGTCGAATGGTGAAA	SFRS3
TRCN0000273174	CAGTGACACAAAGGTGTAATT	SFRS3
TRCN0000273171	CAGGTCCCTTTCTAGAGATAG	SFRS3
TRCN0000006625	GCACAAGTGATTGGAGTAGAA	SFRS4
TRCN0000006626	CGCACAGAGTACAGACTTATT	SFRS4
TRCN0000006627	GCAGTCATTCTAAGAGTAGAT	SFRS4
TRCN0000006628	GCTCCAGATCAAAGTCAGCTT	SFRS4
TRCN0000006629	GCAGTGGATATGGTTATAGAA	SFRS4
TRCN0000231449	GACGCAGTGGATATGGTTATA	SFRS4
TRCN0000231448	CTTTGTGGTGAGCGAGTAATT	SFRS4
TRCN0000231451	CCCTAATGGTGTGTCTATAAT	SFRS4
TRCN0000231447	GTGGATCTGAAGAACGGATAT	SFRS4
TRCN0000000140	CATTTAAGATTCAGGAGTCAT	SFRS5
TRCN0000000141	TGGAAGAGGTAGAGGACGATA	SFRS5
TRCN0000000142	CTGTGTATGAGCTTGATGGAA	SFRS5
TRCN0000000143	GACGGTATGTGAAGGGTGGAT	SFRS5
TRCN0000000144	AGACGGTATGTGAAGGGTGGA	SFRS5
TRCN0000284799	AGTAGTCGCAGACCTCGAAAT	SFRS5
TRCN0000006620	CCCTTTAACAAGTTGAGTAAA	SFRS6
TRCN0000006622	CCGTTCTAGATCTCGCTCAAA	SFRS6
TRCN0000231443	CGAACAAATGAGGGTGTAATT	SFRS6
TRCN0000001140	CGCTAGTATGTTGGAAGTTAT	SFRS7
TRCN0000001141	GATGCTATGAGTGTGGCGAAA	SFRS7
TRCN0000001142	GAACTGTATGGATTGCGAGAA	SFRS7
TRCN0000001143	AGGACTGGATGGAAAGGTGAT	SFRS7
TRCN0000001144	AGCAGGTTTCTTCGTTTGAGT	SFRS7
TRCN0000273401	GATCAAGATCCAGGTCTATTT	SFRS7
TRCN0000006630	GACACCAAATTCCGCTCTCAT	SFRS9
TRCN0000006631	GATGACACCAAATTCCGCTCT	SFRS9
TRCN0000006632	CCTGCGTAAACTGGATGACAC	SFRS9
TRCN0000006633	CTGCGTAAACTGGATGACACC	SFRS9
TRCN0000006634	ATGTCTGTTATGCTGATGTGC	SFRS9
TRCN0000320892	ATTTCTACCAGGGCCATATTA	SFRS9
TRCN0000320817	TGGAAGAAATGGTTATGATTA	SFRS9
TRCN0000083723	CCCTAATAAGAAGCATGCTAA	SON
TRCN0000083724	CGCTCTATGATGTCAGCTTAT	SON
TRCN0000083725	GCAGATTTAGTGAGACCGTTA	SON
TRCN0000083726	GCCTACTACAACACTGGTGTT	SON
TRCN0000083727	GCCAGAATCTTCAATTACGTT	SON
TRCN0000128503	GCATTCTTCTACACCTAATAG	SREK1IP1
TRCN0000074631	ACCCGTGGATTTCAGAGTAAT	SRP19, ZRSR1, ZRSR2
TRCN0000001228	CCATAACTAAAGGATCAGGAT	SRPK1
TRCN0000001230	GTGGCAATGAAAGTAGTTAAA	SRPK1
TRCN0000001231	CAGACCCTAATGATCCAAATA	SRPK1
TRCN0000001232	GAACAACACATTAGCCAACTT	SRPK1
TRCN0000006274	GCACCCTGTAAATGTTACTTT	SRPK2
TRCN0000006275	GCCGGTATCATGTTATTAGAA	SRPK2
TRCN0000006276	CCTGAGGAATATAATCTTGAT	SRPK2
TRCN0000006277	CGTTGTGTGAAGAGTATCATT	SRPK2
TRCN0000006278	GCAACGGGAGATTATTTGTTT	SRPK2
TRCN0000197040	GAGACAGCCTTGGATGAAATA	SRPK2
TRCN0000007067	GAGACCATTGTCCAGCTCATT	SRPK3
TRCN0000007068	TGCAGATAAGATCAAGATCAA	SRPK3
TRCN0000011067	GCCACACAGTTCAGCGCCTTT	SRPK3
TRCN0000011066	CTCCAGCTCTCCGTGCCTTAA	SRPK3
TRCN0000196929	GCTCCTCAAATGGATCATCAA	SRPK3
TRCN0000199786	GAGCGTGTTCTGCCTGAGACC	SRPK3
TRCN0000199553	CGTGAGGGCTCTCGGAGAAAG	SRPK3
TRCN0000234322	AGATCGGCGACGTGTTCAATG	SRPK3
TRCN0000158202	CCAGCCAAAGAAGAACTCGAA	SRSF12
TRCN0000157667	GAAGATGTTCGAGGTGCTGAA	SRSF12
TRCN0000151194	GAACTCGAAGTAGAAGTTCTT	SRSF12
TRCN0000017268	CGTAGGTTAATGAGTGGTAAA	SYNCRIP
TRCN0000017269	CCTCCAGATTATTATGGATAT	SYNCRIP
TRCN0000017270	GCAAAGTAACAGAGGGTCTTA	SYNCRIP
TRCN0000017271	GCACTGAGATATTTGTGGGAA	SYNCRIP
TRCN0000017272	CCAAAGTAGCAGATTCTAGTA	SYNCRIP
TRCN0000275206	GTATGACGATTACTACTATTA	SYNCRIP
TRCN0000001155	GAAAGTGTTGTAGTTGATTGA	U2AF1
TRCN0000001158	GAGATGCAGGAACACTATGAT	U2AF1
TRCN0000001159	GTTGGTTTAATGGACAGCCGA	U2AF1
TRCN0000001160	GAAGACGATGGGCAGAGGAGT	U2AF2
TRCN0000001161	GAAGAAGAAGAAGGTCCGTAA	U2AF2
TRCN0000001162	CGACGAGGAGTATGAGGAGAT	U2AF2
TRCN0000001163	TGCAGATTAACCAGGACAAGA	U2AF2
TRCN0000001164	CGCCTTCTGTGAGTACGTGGA	U2AF2
TRCN0000314964	GAAGAAGAAGGTCCGTAAATA	U2AF2
TRCN0000315016	GGTAGGAACATAGCGTGTTTA	U2AF2
TRCN0000314894	CCTTTGACCAGAGGCGCTAAA	U2AF2
TRCN0000350475	GTGTTGGCTGTGCAGATTAAC	U2AF2
TRCN0000074628	GACATCTACTTGTCTCCAGAT	ZRSR2
TRCN0000074629	CATGTTTACGACGTTTGGAAT	ZRSR2
TRCN0000074630	GCATGTTTACGACGTTTGGAA	ZRSR2
TRCN0000074632	CCTTTGGGAAGAACTCCGAAA	ZRSR2
