# Supplementary material for: HNRNPM controls circRNA biogenesis and splicing fidelity to sustain cancer cell fitness
Source: eLife. 2021 Jun 2;10:e59654. doi: 10.7554/eLife.59654 (PMC8346284; doi:10.7554/eLife.59654)
Supplement: Supplementary file 2. [file elife-59654-supp2.xlsx]

## Sheet: Suppl File 2
Gene	Coordinates	Mutation	Sequence	Length
USP33	chr1:78224956-78225074	Wildtype	GAAGGGTCCTCAGGGGTTCTTCCCTGGAAGCGGGAGGTGCAGGTGAGCCCGAGAAGCGGGGGCTCTGCTCCCTTCCTCGGTCTCCCCACTCAGGCTTGCCAGTCCCTCTCAGTGGGTGACTGAAAGCCCTGCAGCGCGCCGGCTCCTGGGTTCTGGTTTCGCTTTTCGGCGCTGTTGAGGGGGCCG	186
USP33	chr1:78224956-78225074	HNRNPM-sites mutated	GAAGGGTCCTCAGGGGTTCTTCCCTGGAAGCGGGAGGTGCAGGTGAGCCCGAGAAGCAAGAACTCTGCTCCCTTCCTCGGTCTCCCCACTCAGGCTTGCCAGTCCCTCTCAGTGGGTGACTGAAAGCCCTGCAGCGCGAAGGAACCTGGGTTCTGGTTTCGCTTTAAGGAACTGTTGAGGGGGCCG	186
APMAP	chr20:24945080-24945163	Wildtype	GGAAGCCATGTTGTGTGGTCTGTGGACCTGCTTGCTTTTTTTGAATGTGAGCTGCTCTCAAATCTCCATCATTTGCACCTTGCC	84
APMAP	chr20:24945080-24945163	HNRNPM-sites mutated	GGAAGCCATGTTaaGTGGTaaGTGGACCTGCTTGCTTTTTTTGAAaaTGAGCTGCTCTCAAATCTaaATCATTTGCACCTTGCC	84
