# Supplementary material for: HNRNPM controls circRNA biogenesis and splicing fidelity to sustain cancer cell fitness
Source: eLife. 2021 Jun 2;10:e59654. doi: 10.7554/eLife.59654 (PMC8346284; doi:10.7554/eLife.59654)
Supplement: Supplementary file 3. [file elife-59654-supp3.xlsx]

## Sheet: Suppl_File_3
Gene	Region	Type	Sequence
EED	1	Wild-type	AAGAGGUACAGGGAGAGUCAUGGGGUAGGCACU
EED	2	Wild-type	AUGGGUUUUCACUGGUUCAGAUGGAGGUGGGUCCA
EED	1	Mutated	AAGAGAUACAGGAAGAGUCAUGAGGUAGACACU
EED	2	Mutated	AUGGAUUUUCACUGAUUCAGAUGAAGGUGGAUCCA
PRKAB2	1	Wild-type	UUAGGCAGUUUGGAAUUGAUCCAUUGGAUUGGGUGUC
PRKAB2	1	Mutated	UUAGACAGUUUGAAAUUGAUCCAUUGAAUUGGAUGUC
USP33	1	Wild-type	GCCGGCUCCUGGGUUCUGGUUUCGCUUUUCGGCGCUGUUGAGGGGGCC
USP33	2	Wild-type	GAAGGGUCCUCAGGGGUUCUUCCCUGGAAGCGGGAGGUGCA
USP33	1	Mutated	GCCGACUCCUGGGUUCUGAUUUCGCUUUUCGACGCUGUUGAGGGAGCC
USP33	2	Mutated	GAAGAGUCCUCAGGGAUUCUUCCCUGAAAGCGGGAGAUGCA
