# Supplementary figures and images for: HNRNPM controls circRNA biogenesis and splicing fidelity to sustain cancer cell fitness
Source: eLife journal article supplement (doi:10.7554/elife.59654), 2021-06-02

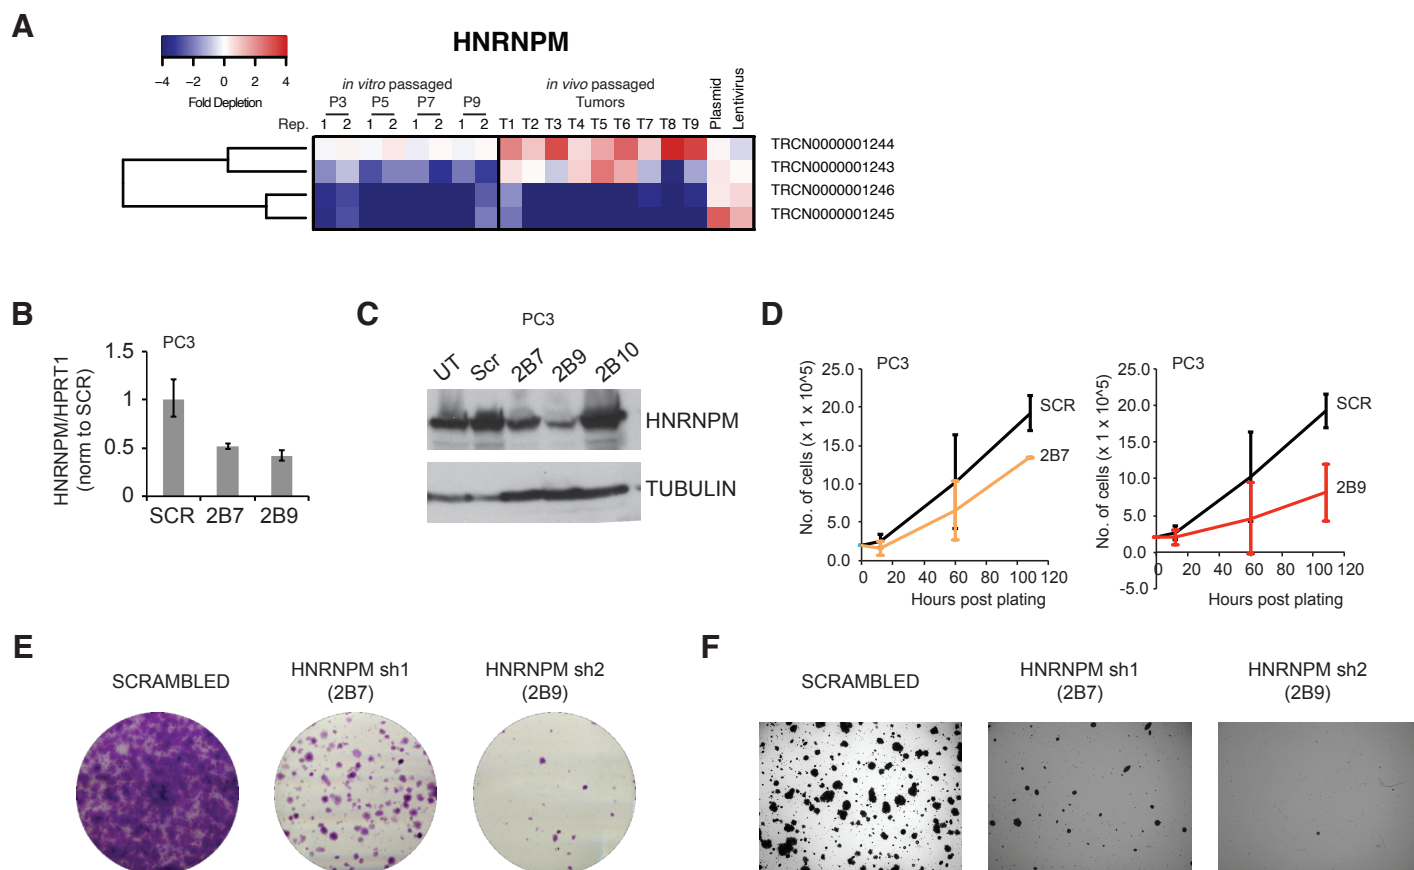

Supplement: supp [file elife-59654-supp-v1.zip]

A

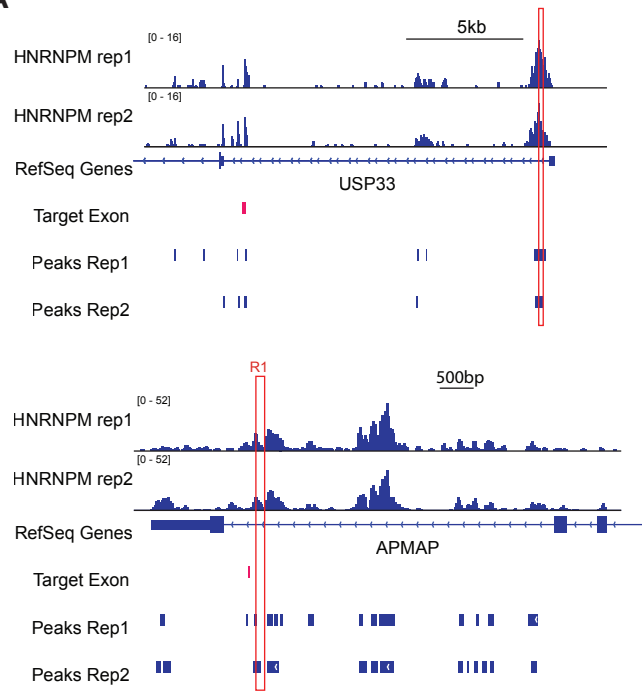

B

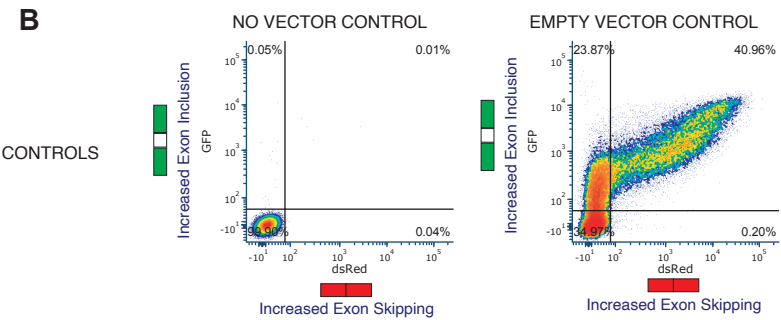

C

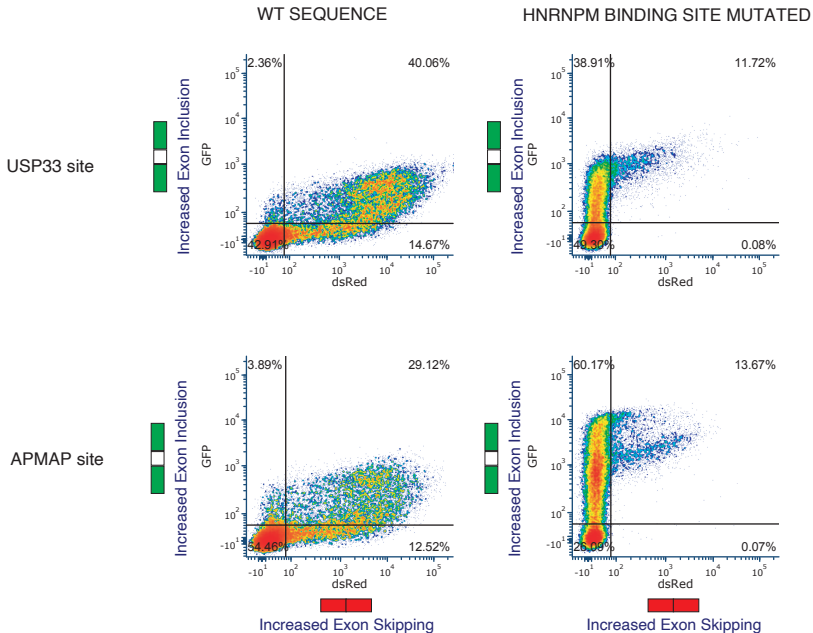

Supplement: supp [file elife-59654-supp-v1.zip]

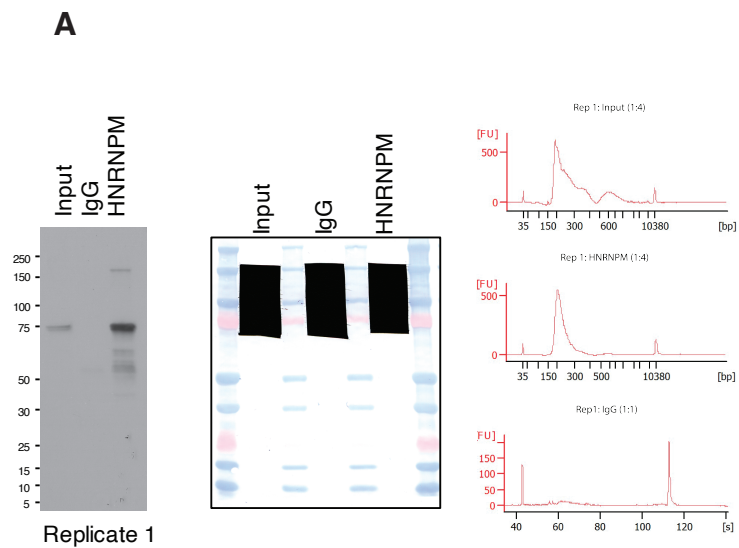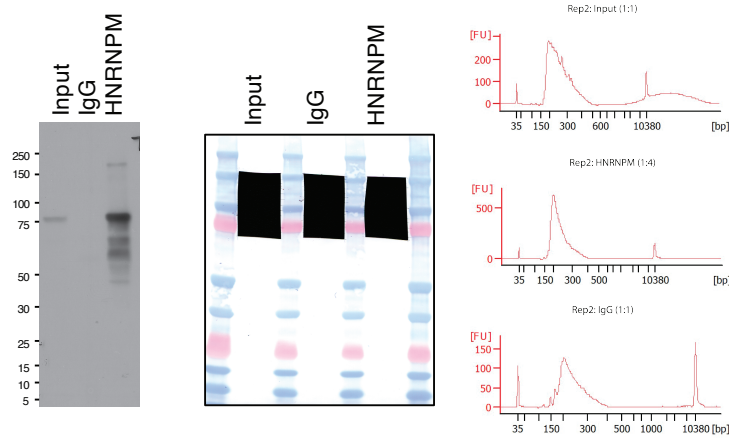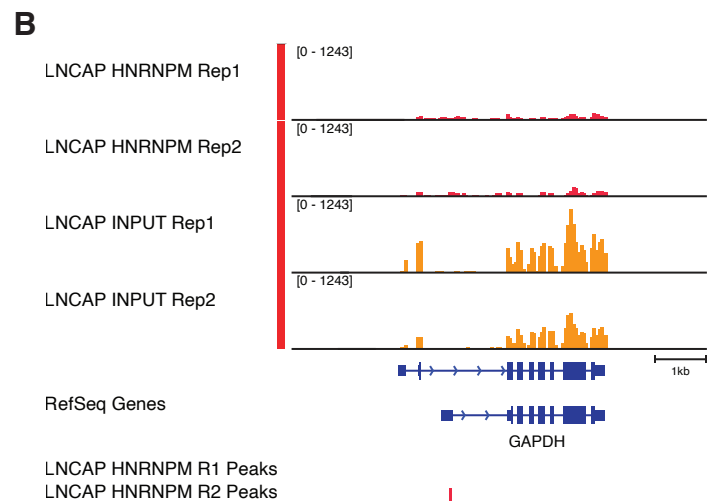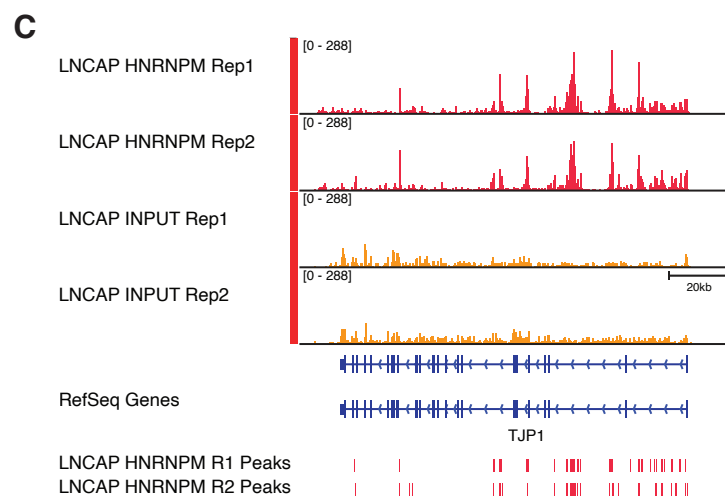

Supplement: supp [file elife-59654-supp-v1.zip]

**A**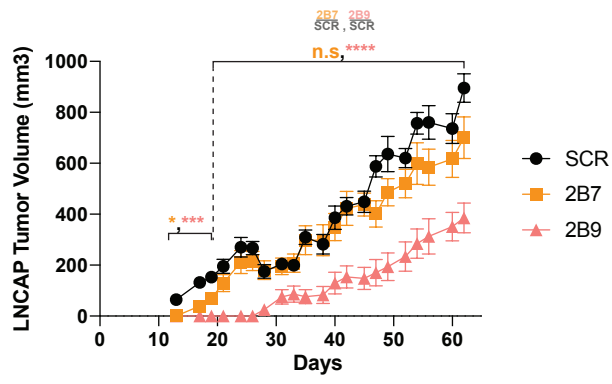**B**

Xenograft Inputs  
(0 Days Post Injection)

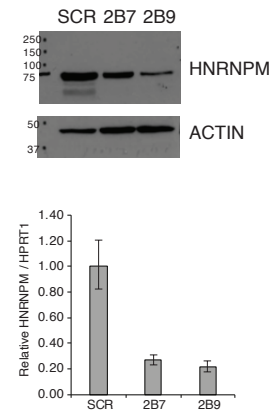**C**

Xenograft Tumor  
(62 Days Post Injection)

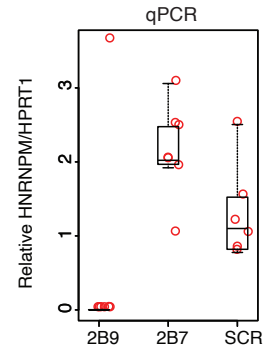

Supplement: supp [file elife-59654-supp-v1.zip]

**A**

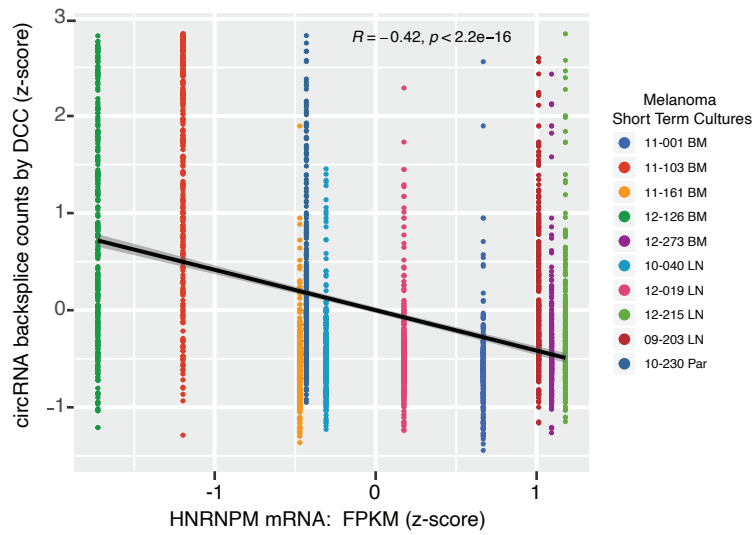

**B**

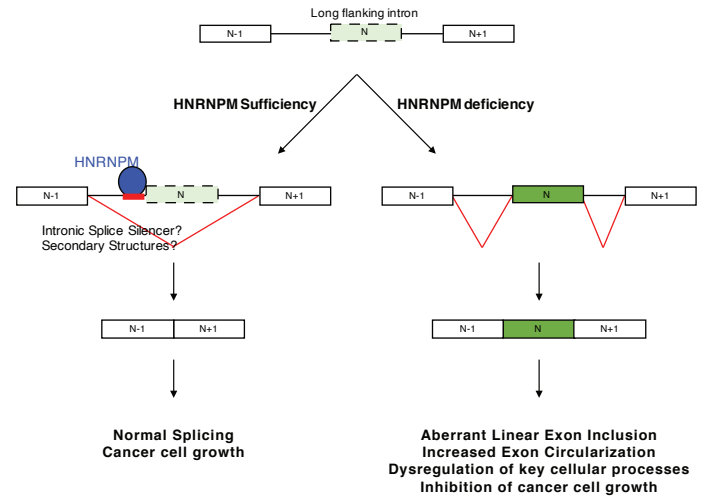

Supplement: supp [file elife-59654-supp-v1.zip]

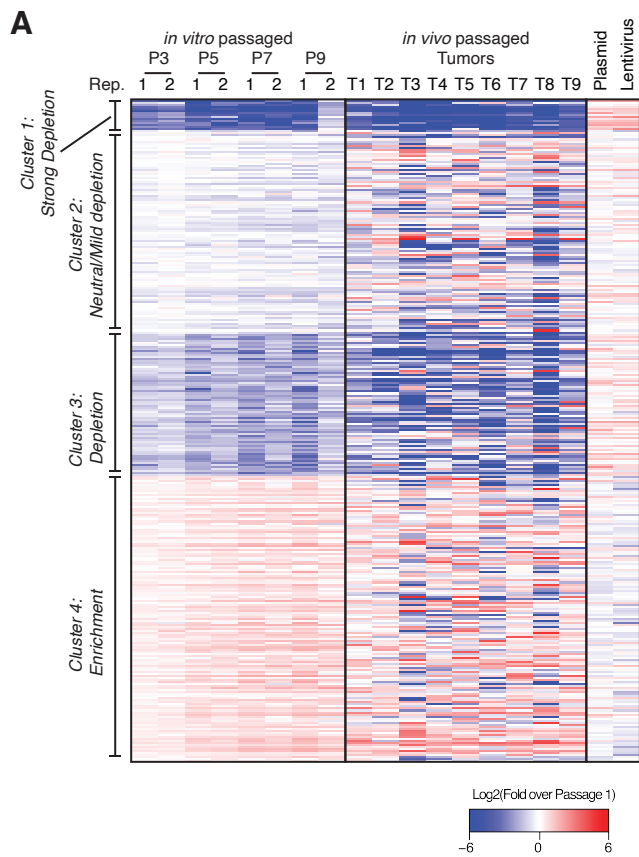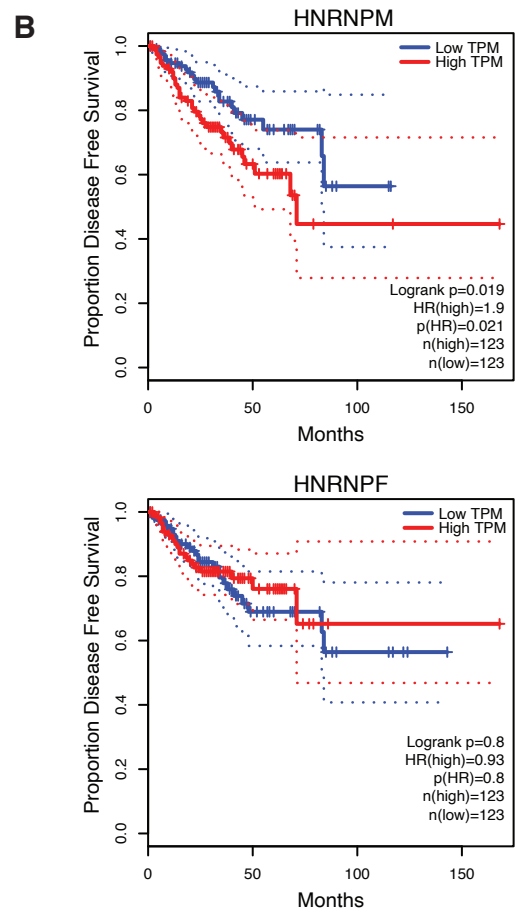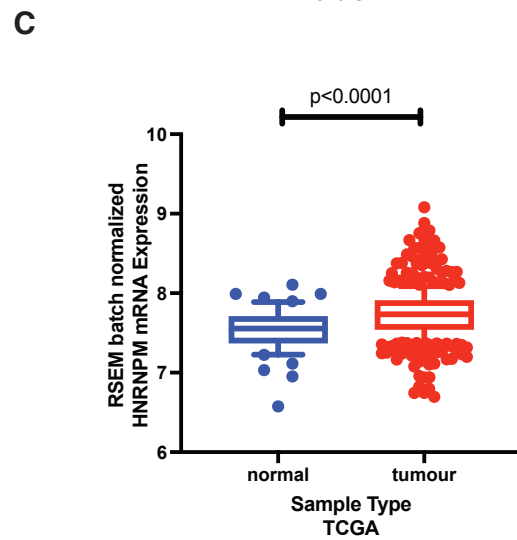

Supplement: supp [file elife-59654-supp-v1.zip]

A

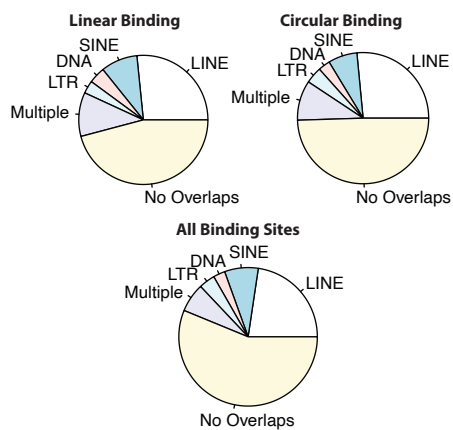

B

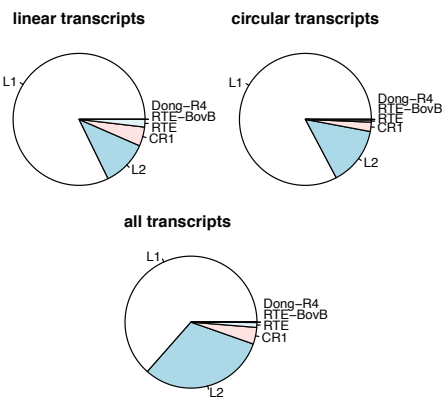

C

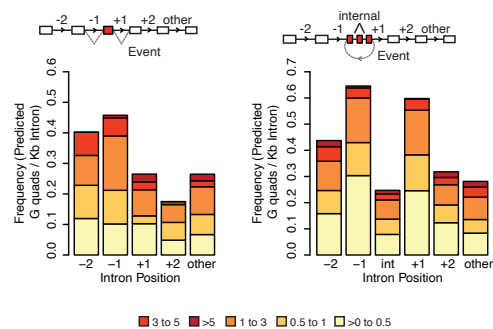

D

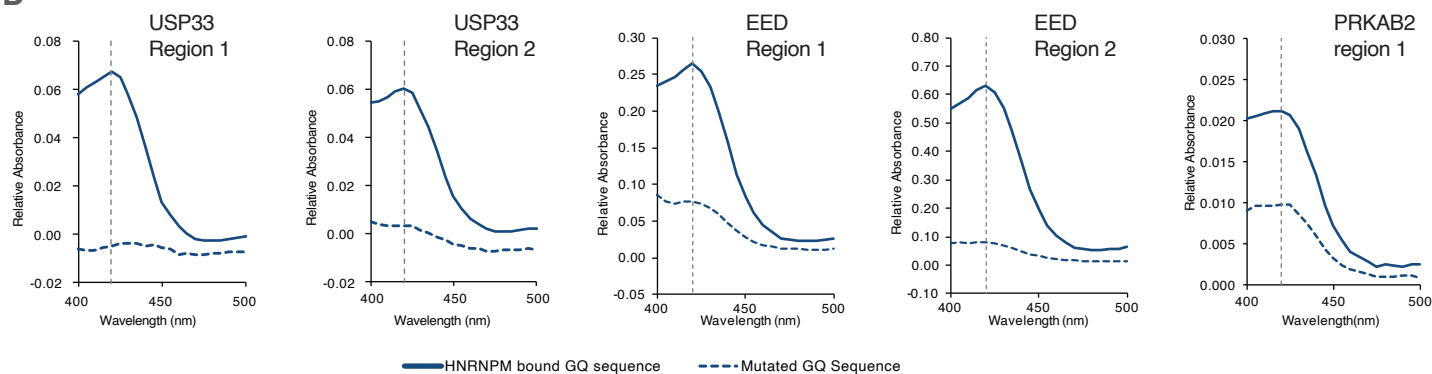

E

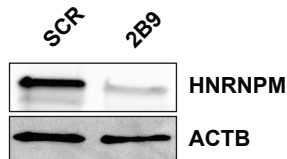

G

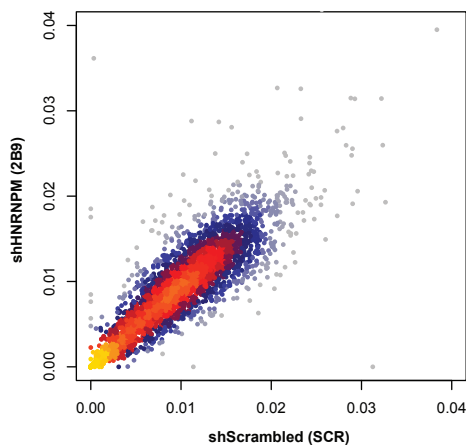

F

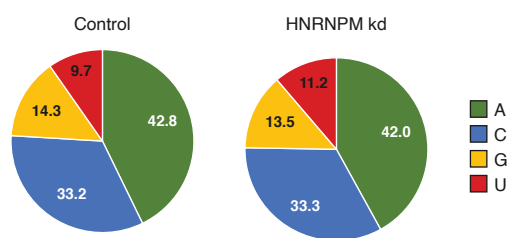

Supplement: supp [file elife-59654-supp-v1.zip]
